# Supplementary material
Source: PubMed Central journal article supplement (PMC1298927)
Supplement: nar_33_20_6587__1.pdf [file nar_33_20_6587__1.pdf]

| time course  | 5 min    |         |          |          |          |          |          |
|--------------|----------|---------|----------|----------|----------|----------|----------|
| experimental | 4786     |         | 2064     |          | 7549     |          | 47       |
| channel      | CH1I     | CH2I    | CH1I     | CH2I     | CH1I     | CH2I     | CH1I     |
| gamma        | 230.2605 | 123.63  | 220.7608 | 166.2275 | 291.8823 | 184.7299 | 224.925  |
| sigma        | 0.383047 | 0.37322 | 0.353256 | 0.36554  | 0.366488 | 0.377659 | 0.378729 |
| Upper limit  | 2.8      | 3       | 3        | 3        | 3        | 3        | 2.2      |
| Lower limit  | -1.7     | -1.7    | -1.5     | -1.5     | -1       | -0.8     | -1.6     |
| grid number  | mu       | mu      | mu       | mu       | mu       | mu       | mu       |
| 1            | 544.7395 | 1238.37 | 706.2392 | 764.7725 | 1180.118 | 1686.27  | 750.075  |
| 2            | 500.7395 | 1005.37 | 596.2392 | 558.7725 | 878.1177 | 1358.27  | 634.075  |
| 3            | 643.7395 | 1114.37 | 728.2392 | 579.7725 | 1095.118 | 1411.27  | 737.075  |
| 4            | 732.7395 | 1109.37 | 887.2392 | 777.7725 | 1060.118 | 1273.27  | 816.075  |
| 5            | 565.7395 | 956.37  | 811.2392 | 849.7725 | 595.1177 | 879.2701 | 634.075  |
| 6            | 480.7395 | 695.37  | 671.2392 | 596.7725 | 449.1177 | 574.2701 | 497.075  |
| 7            | 604.7395 | 897.37  | 774.2392 | 653.7725 | 548.1177 | 702.2701 | 620.075  |
| 8            | 493.7395 | 663.37  | 622.2392 | 585.7725 | 496.1177 | 627.2701 | 504.075  |
| 9            | 478.7395 | 791.37  | 688.2392 | 812.7725 | 526.1177 | 814.2701 | 524.075  |
| 10           | 391.7395 | 533.37  | 521.2392 | 511.7725 | 362.1177 | 469.2701 | 368.075  |
| 11           | 440.7395 | 489.37  | 531.2392 | 477.7725 | 256.1177 | 333.2701 | 345.075  |
| 12           | 503.7395 | 465.37  | 658.2392 | 603.7725 | 229.1177 | 260.2701 | 346.075  |
| 13           | 396.7395 | 753.37  | 618.2392 | 729.7725 | 546.1177 | 792.2701 | 484.075  |
| 14           | 423.7395 | 561.37  | 518.2392 | 538.7725 | 419.1177 | 536.2701 | 368.075  |
| 15           | 531.7395 | 596.37  | 594.2392 | 579.7725 | 365.1177 | 445.2701 | 430.075  |
| 16           | 500.7395 | 465.37  | 676.2392 | 695.7725 | 287.1177 | 353.2701 | 353.075  |

| 30 min   |          |          |          |          |
|----------|----------|----------|----------|----------|
| 87       | 2555     |          | 7547     |          |
| CH2I     | CH1I     | CH2I     | CH1I     | CH2I     |
| 126.5321 | 284.9998 | 270.0193 | 313.263  | 199.3268 |
| 0.374563 | 0.350228 | 0.354814 | 0.367002 | 0.378476 |
| 2.2      | 3.4      | 3.6      | 3        | 2.6      |
| -1.7     | -1       | -0.8     | -1       | -2       |
| mu       | mu       | mu       | mu       | mu       |
| 1235.468 | 954.0002 | 1582.981 | 652.737  | 995.6732 |
| 1002.468 | 867.0002 | 1391.981 | 630.737  | 922.6732 |
| 1111.468 | 1043     | 1461.981 | 997.737  | 1230.673 |
| 1106.468 | 1037     | 1472.981 | 1087.737 | 1393.673 |
| 953.4679 | 784.0002 | 1139.981 | 581.737  | 745.6732 |
| 692.4679 | 684.0002 | 886.9807 | 445.737  | 562.6732 |
| 894.4679 | 788.0002 | 918.9807 | 462.737  | 575.6732 |
| 660.4679 | 717.0002 | 1021.981 | 434.737  | 451.6732 |
| 788.4679 | 603.0002 | 781.9807 | 557.737  | 758.6732 |
| 530.4679 | 490.0002 | 645.9807 | 464.737  | 626.6732 |
| 486.4679 | 485.0002 | 564.9807 | 393.737  | 506.6732 |
| 462.4679 | 641.0002 | 853.9807 | 440.737  | 477.6732 |
| 750.4679 | 437.0002 | 562.9807 | 620.737  | 851.6732 |
| 558.4679 | 376.0002 | 468.9807 | 620.737  | 940.6732 |
| 593.4679 | 483.0002 | 552.9807 | 803.737  | 1051.673 |
| 462.4679 | 561.0002 | 751.9807 | 877.737  | 1111.673 |

| SPOT | NAME    | STRAND | GENE NAME | CH1I_MEAN | CH2I_MEAN | FAILED | Ch1       | mu_ch1  |
|------|---------|--------|-----------|-----------|-----------|--------|-----------|---------|
| 1    | YBR160W | W      | CDC28     | 1298      | 1981      | 0      | gamma     | 750.075 |
| 2    | YBR162C | C      | TOS1      | 4762      | 4988      | 0      | 224.925   | 750.075 |
| 3    | YBR163W | W      | DEM1      | 1095      | 1361      | 0      | sigma (lc | 750.075 |
| 4    | YBR165W | W      | UBS1      | 735       | 923       | 0      | 0.378729  | 750.075 |
| 5    | YBR167C | C      | POP7      | 805       | 1069      | 0      | mu (log10 | 750.075 |
| 6    | YBR169C | C      | SSE2      | 1009      | 3116      | 0      | (each gri | 750.075 |
| 7    | YBR255W | W      |           | 587       | 929       | 0      |           | 750.075 |
| 8    | YBR257W | W      | POP4      | 1088      | 1653      | 0      | upper lin | 750.075 |
| 9    | YBR259W | W      |           | 492       | 690       | 0      | 2.2       | 750.075 |
| 10   | YBR261C | C      |           | 1187      | 1943      | 0      | lower lin | 750.075 |
| 11   | YBR263W | W      | SHM1      | 2958      | 3177      | 0      | -1.6      | 750.075 |
| 12   | YBR265W | W      | TSC10     | 1467      | 1801      | 0      |           | 750.075 |
| 13   | YCL050C | C      | APA1      | 1645      | 3144      | 0      |           | 750.075 |
| 14   | YCL052C | C      | PBN1      | 1249      | 1704      | 0      |           | 750.075 |
| 15   | YCL054W | W      | SPB1      | 1125      | 2248      | 0      |           | 750.075 |
| 16   | YCL056C | C      |           | 1157      | 1858      | 0      |           | 750.075 |
| 17   | YCL058C | C      | FYV5      | 1420      | 2414      | 0      |           | 750.075 |
| 18   | YCL060C |        |           | 1831      | 2472      | 0      |           | 750.075 |
| 19   | YCR058C |        |           | 817       | 1107      | 0      |           | ...     |
| 20   | YCR060W | W      |           | 896       | 1325      | 0      |           | ...     |
| 21   | YCR062W | W      |           | 926       | 1751      | 0      |           | ...     |
| 22   | YCR064C | C      |           | 861       | 890       | 0      |           | ...     |
| 23   | YCR066W | W      | RAD18     | 902       | 1059      | 0      |           | ...     |
| 24   | YCR068W | W      | CVT17     | 1141      | 1296      | 0      |           |         |
| 25   | YDL026W | W      |           | 365       | 414       | 0      |           |         |
| 26   | YDL028C | C      | MPS1      | 491       | 612       | 0      |           |         |
| 27   | YDL030W | W      | PRP9      | 470       | 680       | 0      |           |         |
| 28   | YDL032W | W      |           | 488       | 600       | 0      |           |         |
| 29   | YDL034W | W      |           | 494       | 700       | 0      |           |         |
| 30   | YDL036C | C      |           | 495       | 703       | 0      |           |         |
| 31   | YDL122W | W      | UBP1      | 1668      | 2978      | 0      |           |         |
| 32   | YDL124W | W      |           | 2386      | 8829      | 0      |           |         |
| 33   | YDL126C | C      | CDC48     | 4122      | 8269      | 0      |           |         |
| 34   | YDL128W | W      | VCX1      | 2639      | 3841      | 0      |           |         |
| 35   | YDL130W | W      | RPP1B     | 521       | 394       | 0      |           |         |
| 36   | YDL132W | W      | CDC53     | 2030      | 3429      | 0      |           |         |
| 37   | YDL218W | W      |           | 492       | 616       | 0      |           |         |
| 38   | YDL220C | C      | CDC13     | 536       | 720       | 0      |           |         |
| 39   | YDL222C | C      |           | 572       | 1386      | 0      |           |         |
| 40   | YDL224C | C      | WHI4      | 877       | 1106      | 0      |           |         |
| 41   | YDL226C | C      | GCS1      | 2405      | 3528      | 0      |           |         |
| 42   | YDL228C | C      |           | 686       | 932       | 1      |           |         |
| 43   | YDR066C | C      |           | 975       | 1322      | 0      |           |         |
| 44   | YDR068W | W      | DOS2      | 1852      | 2848      | 0      |           |         |
| 45   | YDR070C | C      |           | 1066      | 1934      | 1      |           |         |
| 46   | YDR072C | C      | IPT1      | 2867      | 2442      | 0      |           |         |
| 47   | YDR074W | W      | TPS2      | 4803      | 4859      | 0      |           |         |
| 48   | YDR076W | W      | RAD55     | 995       | 1094      | 0      |           |         |
| 49   | YDR162C | C      | NBP2      | 802       | 1268      | 0      |           |         |
| 50   | YDR164C | C      | SEC1      | 986       | 1649      | 0      |           |         |
| 51   | YDR166C | C      | SEC5      | 397       | 506       | 1      |           |         |

|     |          |   |        |      |      |   |
|-----|----------|---|--------|------|------|---|
| 52  | YDR168W  | W | CDC37  | 1890 | 3799 | 0 |
| 53  | YDR170C  | C | SEC7   | 744  | 1207 | 1 |
| 54  | YDR172W  | W | SUP35  | 4590 | 7748 | 0 |
| 55  | YDR267C  | C |        | 1279 | 1725 | 0 |
| 56  | YDR268W  | W | MSW1   | 975  | 1428 | 0 |
| 57  | YDR269C  | C |        | 715  | 810  | 0 |
| 58  | YDR270W  | W | CCC2   | 734  | 1069 | 0 |
| 59  | YDR271C  | C |        | 789  | 1124 | 0 |
| 60  | YDR272W  | W | GL02   | 1414 | 2998 | 0 |
| 61  | YDR354W  | W | TRP4   | 1756 | 2034 | 0 |
| 62  | YDR356W  | W | NUF1   | 1151 | 1739 | 2 |
| 63  | YDR358W  | W | GGA1   | 1023 | 1228 | 0 |
| 64  | YDR360W  | W |        | 878  | 1115 | 0 |
| 65  | YDR362C  | C | TFC6   | 900  | 1329 | 0 |
| 66  | YDR364C  | C | CDC40  | 1091 | 1665 | 0 |
| 67  | YDR450W  | W | RPS18A | 1405 | 1988 | 0 |
| 68  | YDR452W  | W | PHM5   | 3063 | 4391 | 0 |
| 69  | YDR454C  | C | GUK1   | 4227 | 4464 | 0 |
| 70  | YDR456W  | W | NHX1   | 3136 | 3237 | 0 |
| 71  | YDR458C  | C |        | 694  | 979  | 0 |
| 72  | YDR460W  | W | TFB3   | 799  | 1223 | 0 |
| 73  | YAL001C  | C | TFC3   | 370  | 415  | 1 |
| 74  | YAL003W  | W | EFB1   | 1686 | 2631 | 0 |
| 75  | YAL005C  | C | SSA1   | 3491 | 6529 | 0 |
| 76  | YAL008W  | W | FUN14  | 422  | 573  | 0 |
| 77  | YAL010C  | C | MDM10  | 495  | 743  | 0 |
| 78  | YAL012W  | W | CYS3   | 3561 | 5325 | 0 |
| 79  | YAR062W  | W |        | 654  | 894  | 0 |
| 80  | YAR068W  | W |        | 939  | 1457 | 0 |
| 81  | YAR070C  | C |        | 492  | 517  | 0 |
| 82  | YAR073W  | W | IMD1   | 2110 | 2089 | 0 |
| 83  | YBL001C  | C | ECM15  | 1491 | 2186 | 0 |
| 84  | YBL003C  | C | HTA2   | 3156 | 2718 | 0 |
| 85  | YBL087C  | C | RPL23A | 2117 | 2498 | 0 |
| 86  | YBL089W  | W |        | 1452 | 1860 | 0 |
| 87  | YBL091C  | C | MAP2   | 1661 | 3277 | 0 |
| 88  | YBL093C  | C | ROX3   | 996  | 1781 | 0 |
| 89  | YBL095W  | W |        | 998  | 1357 | 0 |
| 90  | YBL097W  | W | BRN1   | 522  | 684  | 2 |
| 91  | YBR066C  | C | NRG2   | 1423 | 2006 | 0 |
| 92  | YBR068C  | C | BAP2   | 587  | 749  | 0 |
| 93  | YBR070C  | C |        | 1248 | 1499 | 0 |
| 94  | YBR072W  | W | HSP26  | 370  | 780  | 0 |
| 95  | YBR074W  | W |        | 2205 | 2240 | 0 |
| 96  | YBR076W  | W | ECM8   | 636  | 669  | 0 |
| 97  | YEL001C  | C |        | 704  | 1024 | 0 |
| 98  | YEL003W  | W | GIM4   | 1271 | 1844 | 0 |
| 99  | YEL005C  | C | VAB2   | 422  | 583  | 0 |
| 100 | YEL007W  | W | TOS9   | 967  | 1423 | 3 |
| 101 | YEL009C  | C | GCN4   | 3197 | 4440 | 0 |
| 102 | YEL011W  | W | GLC3   | 400  | 504  | 0 |
| 103 | YER0191C |   |        | 1952 | 2616 | 0 |

|     |         |   |        |      |       |   |
|-----|---------|---|--------|------|-------|---|
| 104 | YER020W | W | GPA2   | 1475 | 1952  | 0 |
| 105 | YER022W | W | SRB4   | 854  | 1304  | 0 |
| 106 | YER024W | W | YAT2   | 517  | 711   | 0 |
| 107 | YER026C | C | CH01   | 2269 | 3456  | 0 |
| 108 | YER028C | C |        | 831  | 1042  | 0 |
| 109 | YER111C | C | SWI4   | 1091 | 1864  | 0 |
| 110 | YER113C | C |        | 1577 | 2179  | 0 |
| 111 | YER115C | C | SPR6   | 1141 | 1598  | 0 |
| 112 | YER117W | W | RPL23B | 3659 | 4623  | 0 |
| 113 | YER119C | C |        | 1674 | 2548  | 0 |
| 114 | YER121W | W |        | 716  | 1001  | 0 |
| 115 | YFL014W | W | HSP12  | 1052 | 13372 | 0 |
| 116 | YFL016C | C | MDJ1   | 1117 | 1839  | 0 |
| 117 | YFL018C | C | LPD1   | 2951 | 5656  | 0 |
| 118 | YFL020C | C | PAU5   | 1094 | 1233  | 0 |
| 119 | YFL022C | C | FRS2   | 3558 | 4481  | 0 |
| 120 | YFL024C | C | EPL1   | 560  | 758   | 1 |
| 121 | YFR041C | C |        | 981  | 1324  | 0 |
| 122 | YFR043C | C |        | 600  | 860   | 0 |
| 123 | YFR045W | W |        | 853  | 1134  | 0 |
| 124 | YFR047C | C |        | 1517 | 2512  | 0 |
| 125 | YFR049W | W | YMR31  | 984  | 1453  | 0 |
| 126 | YFR051C | C | RET2   | 1211 | 1623  | 0 |
| 127 | YGL080W | W |        | 1058 | 1556  | 0 |
| 128 | YGL082W | W |        | 1223 | 1819  | 0 |
| 129 | YGL084C | C | GUP1   | 1981 | 2696  | 0 |
| 130 | YGL086W | W | MAD1   | 379  | 425   | 1 |
| 131 | YGL088W | W |        | 482  | 572   | 0 |
| 132 | YGL090W | W | LIF1   | 811  | 1236  | 0 |
| 133 | YGL176C | C |        | 602  | 819   | 0 |
| 134 | YGL178W | W | MPT5   | 478  | 724   | 0 |
| 135 | YGL180W | W | APG1   | 459  | 649   | 0 |
| 136 | YGL182C | C |        | 651  | 858   | 0 |
| 137 | YGL184C | C | STR3   | 588  | 843   | 0 |
| 138 | YGL186C | C |        | 1568 | 2276  | 0 |
| 139 | YGR009C | C | SEC9   | 2097 | 3044  | 0 |
| 140 | YGR011W | W |        | 979  | 1247  | 0 |
| 141 | YGR013W | W | SNU71  | 1238 | 1838  | 0 |
| 142 | YGR015C | C |        | 999  | 1194  | 0 |
| 143 | YGR017W | W |        | 1768 | 1927  | 1 |
| 144 | YGR019W | W | UGA1   | 1260 | 3075  | 0 |
| 145 | YGR105W | W | VMA21  | 1346 | 1738  | 0 |
| 146 | YGR107W | W |        | 495  | 587   | 0 |
| 147 | YGR109C | C | CLB6   | 863  | 1321  | 0 |
| 148 | YGR111W | W |        | 1117 | 2087  | 0 |
| 149 | YGR113W | W | DAM1   | 1146 | 1506  | 0 |
| 150 | YGR115C | C |        | 2585 | 3552  | 0 |
| 151 | YGR201C | C |        | 648  | 1069  | 0 |
| 152 | YGR203W | W |        | 760  | 933   | 0 |
| 153 | YGR205W | W |        | 685  | 828   | 0 |
| 154 | YGR207C | C |        | 1530 | 2863  | 0 |
| 155 | YGR209C | C | TRX2   | 1320 | 2533  | 0 |

|     |          |   |        |      |      |   |
|-----|----------|---|--------|------|------|---|
| 156 | YGR211W  | W | ZPR1   | 1820 | 2879 | 0 |
| 157 | YHL001W  | W | RPL14B | 4023 | 5351 | 0 |
| 158 | YHL003C  | C | LAG1   | 1114 | 1527 | 0 |
| 159 | YHL005C  | C |        | 676  | 902  | 0 |
| 160 | YHL007C  | C | STE20  | 1250 | 2248 | 0 |
| 161 | YHL009C  | C | YAP3   | 960  | 1393 | 0 |
| 162 | YHL011C  | C | PRS3   | 1161 | 1656 | 0 |
| 163 | YHR046C  | C |        | 1377 | 2263 | 0 |
| 164 | YHR048W  | W |        | 337  | 356  | 1 |
| 165 | YHR050W  | W | SMF2   | 1606 | 1769 | 0 |
| 166 | YHR052W  | W | NSA3   | 1701 | 2939 | 0 |
| 167 | YHR054C  | C |        | 1840 | 2530 | 0 |
| 168 | YHR056C  | C | RSC30  | 1307 | 1749 | 0 |
| 169 | YHR141C  | C | RPL42B | 2554 | 3370 | 0 |
| 170 | YHR143BW |   |        | 350  | 417  | 1 |
| 171 | YHR144C  | C | DCD1   | 898  | 1309 | 0 |
| 172 | YHR146W  | W | CRP1   | 2562 | 4162 | 0 |
| 173 | YHR148W  | W | IMP3   | 1041 | 1767 | 0 |
| 174 | YHR150W  | W |        | 349  | 433  | 0 |
| 175 | YIL017W  |   |        | 593  | 746  | 0 |
| 176 | YIL019W  | W |        | 1218 | 2034 | 0 |
| 177 | YIL021W  | W | RPB3   | 1690 | 2706 | 0 |
| 178 | YIL023C  | C |        | 1059 | 1376 | 0 |
| 179 | YIL025C  | C |        | 458  | 506  | 0 |
| 180 | YIL027C  | C | KRE27  | 961  | 1494 | 0 |
| 181 | YIL114C  | C | POR2   | 1174 | 1448 | 0 |
| 182 | YIL116W  | W | HIS5   | 1407 | 1748 | 0 |
| 183 | YIL118W  | W | RHO3   | 902  | 1361 | 0 |
| 184 | YIL120W  | W | QDR1   | 561  | 688  | 0 |
| 185 | YIL122W  | W |        | 643  | 791  | 0 |
| 186 | YIL124W  | W | AYR1   | 1534 | 2627 | 0 |
| 187 | YIR033W  | W | MGA2   | 528  | 624  | 0 |
| 188 | YIR035C  | C |        | 712  | 870  | 0 |
| 189 | YIR037W  | W | HYR1   | 2108 | 4888 | 0 |
| 190 | YIR039C  | C | YPS6   | 457  | 527  | 0 |
| 191 | YIR041W  | W |        | 672  | 710  | 0 |
| 192 | YIR043C  | C |        | 1104 | 1647 | 0 |
| 193 | YJL086C  | C |        | 516  | 570  | 0 |
| 194 | YJL088W  | W | ARG3   | 453  | 633  | 0 |
| 195 | YJL090C  | C | DPB11  | 526  | 708  | 0 |
| 196 | YJL092W  | W | HPR5   | 697  | 888  | 0 |
| 197 | YJL094C  | C | KHA1   | 330  | 338  | 1 |
| 198 | YJL096W  | W | MRPL49 | 957  | 1349 | 0 |
| 199 | YJL182C  | C |        | 543  | 634  | 0 |
| 200 | YJL184W  | W |        | 1027 | 1653 | 0 |
| 201 | YJL186W  | W | MNN5   | 2189 | 3432 | 0 |
| 202 | YJL188C  | C | BUD19  | 2000 | 2844 | 0 |
| 203 | YJL190C  | C | RPS22A | 3203 | 3332 | 0 |
| 204 | YJL192C  | C |        | 2612 | 3745 | 0 |
| 205 | YJR053W  | W | BFA1   | 620  | 749  | 0 |
| 206 | YJR055W  | W | HIT1   | 499  | 658  | 0 |
| 207 | YJR057W  | W | CDC8   | 835  | 1164 | 0 |

|     |         |   |        |      |       |   |
|-----|---------|---|--------|------|-------|---|
| 208 | YJR059W | W | PTK2   | 1387 | 1954  | 2 |
| 209 | YJR061W | W |        | 411  | 484   | 0 |
| 210 | YJR063W | W | RPA12  | 1706 | 2392  | 0 |
| 211 | YJR150C | C | DAN1   | 452  | 474   | 0 |
| 212 | YJR152W | W | DAL5   | 398  | 414   | 0 |
| 213 | YJR154W | W |        | 636  | 562   | 0 |
| 214 | YJR156C | C | THI11  | 847  | 975   | 0 |
| 215 | YJR158W | W | HXT16  | 590  | 674   | 0 |
| 216 | YJR160C | C |        | 328  | 307   | 1 |
| 217 | YKL083W | W |        | 337  | 313   | 1 |
| 218 | YKL085W | W | MDH1   | 1615 | 2150  | 0 |
| 219 | YKL087C | C | CYT2   | 845  | 1078  | 0 |
| 220 | YKL089W | W | MIF2   | 824  | 1234  | 0 |
| 221 | YKL091C | C |        | 725  | 1263  | 0 |
| 222 | YKL093W | W | MBR1   | 645  | 782   | 0 |
| 223 | YKL178C | C | STE3   | 464  | 597   | 0 |
| 224 | YKL180W | W | RPL17A | 7437 | 8693  | 0 |
| 225 | YKL182W | W | FAS1   | 573  | 620   | 1 |
| 226 | YKL184W | W | SPE1   | 2120 | 2523  | 0 |
| 227 | YKL186C | C | MTR2   | 1174 | 1903  | 0 |
| 228 | YKL188C | C | PXA2   | 610  | 705   | 0 |
| 229 | YKR049C | C |        | 742  | 1089  | 0 |
| 230 | YKR051W | W |        | 896  | 1000  | 0 |
| 231 | YKR053C | C | YSR3   | 796  | 867   | 0 |
| 232 | YKR055W | W | RHO4   | 781  | 1001  | 0 |
| 233 | YKR057W | W | RPS21A | 2344 | 3033  | 0 |
| 234 | YKR059W | W | TIF1   | 7989 | 7792  | 0 |
| 235 | YLL039C | C | UBI4   | 1698 | 3990  | 3 |
| 236 | YLL041C | C | SDH2   | 1209 | 1094  | 0 |
| 237 | YLL043W | W | FPS1   | 1327 | 1779  | 0 |
| 238 | YLL045C | C | RPL8B  | 9949 | 11796 | 0 |
| 239 | YLL047W | W |        | 617  | 726   | 0 |
| 240 | YLL049W | W |        | 1406 | 1603  | 0 |
| 241 | YLR068W | W | FYV7   | 942  | 1384  | 0 |
| 242 | YLR070C | C |        | 511  | 627   | 0 |
| 243 | YLR072W | W |        | 495  | 705   | 0 |
| 244 | YLR074C | C | BUD20  | 1200 | 2290  | 0 |
| 245 | YLR076C | C |        | 2728 | 3923  | 0 |
| 246 | YLR078C | C | BOS1   | 1011 | 1563  | 0 |
| 247 | YLR164W | W |        | 598  | 705   | 0 |
| 248 | YLR166C | C | SEC10  | 935  | 1484  | 0 |
| 249 | YLR168C | C |        | 948  | 1224  | 0 |
| 250 | YLR170C | C | APS1   | 964  | 1474  | 0 |
| 251 | YLR172C | C | DPH5   | 2434 | 2676  | 0 |
| 252 | YLR174W | W | IDP2   | 743  | 1037  | 0 |
| 253 | YLR260W | W | LCB5   | 1089 | 1714  | 0 |
| 254 | YLR262C | C | YPT6   | 1156 | 1523  | 0 |
| 255 | YLR264W | W | RPS28B | 2910 | 3327  | 0 |
| 256 | YLR266C | C |        | 1029 | 1328  | 0 |
| 257 | YLR268W | W | SEC22  | 1441 | 1908  | 0 |
| 258 | YLR270W | W |        | 989  | 2234  | 0 |
| 259 | YLR356W | W |        | 956  | 1551  | 0 |

|     |         |   |       |      |      |   |
|-----|---------|---|-------|------|------|---|
| 260 | YLR358C | C |       | 1207 | 1575 | 0 |
| 261 | YLR360W | W | VPS38 | 1046 | 1407 | 0 |
| 262 | YLR362W | W | STE11 | 645  | 818  | 0 |
| 263 | YLR364W | W |       | 502  | 585  | 0 |
| 264 | YLR366W | W |       | 426  | 430  | 0 |
| 265 | YLR452C | C | SST2  | 329  | 313  | 0 |
| 266 | YLR454W | W |       | 361  | 394  | 1 |
| 267 | YLR456W | W |       | 668  | 820  | 0 |
| 268 | YLR458W | W |       | 571  | 701  | 0 |
| 269 | YLR460C | C |       | 602  | 633  | 0 |
| 270 | YLR462W | W |       | 1530 | 1684 | 0 |
| 271 | YML096W | W |       | 950  | 1399 | 0 |
| 272 | YML098W | W | TAF19 | 302  | 279  | 0 |
| 273 | YML100W | W | TSL1  | 2820 | 3806 | 0 |
| 274 | YML102W | W | CAC2  | 891  | 1250 | 0 |
| 275 | YML104C | C | MDM1  | 733  | 996  | 0 |
| 276 | YML106W | W | URA5  | 2771 | 3074 | 0 |
| 277 | YMR067C | C |       | 1261 | 2018 | 0 |
| 278 | YMR069W | W |       | 707  | 938  | 0 |
| 279 | YMR071C | C |       | 1276 | 1741 | 0 |
| 280 | YMR073C | C |       | 1022 | 1439 | 0 |
| 281 | YMR075W | W |       | 891  | 1283 | 0 |
| 282 | YMR077C | C | VPS20 | 788  | 1054 | 0 |
| 283 | YMR173W | W | DDR48 | 1656 | 4326 | 2 |
| 284 | YMR177W | W | MMT1  | 832  | 993  | 0 |
| 285 | YMR179W | W | SPT21 | 790  | 1257 | 0 |
| 286 | YMR181C | C |       | 858  | 1052 | 0 |
| 287 | YMR183C | C | SS02  | 2149 | 3295 | 0 |
| 288 | YMR185W | W |       | 523  | 771  | 0 |
| 289 | YMR280C | C | CAT8  | 343  | 366  | 1 |
| 290 | YMR282C | C | AEP2  | 1018 | 1311 | 0 |
| 291 | YMR284W | W | YKU70 | 637  | 924  | 1 |
| 292 | YMR287C | C | MSU1  | 806  | 1168 | 0 |
| 293 | YMR289W | W |       | 1218 | 1812 | 0 |
| 294 | YMR291W | W |       | 1262 | 1467 | 0 |
| 295 | YNL053W | W | MSG5  | 1215 | 1690 | 0 |
| 296 | YNL055C | C | POR1  | 4022 | 7900 | 0 |
| 297 | YNL057W | W |       | 1039 | 1497 | 0 |
| 298 | YNL059C | C | ARP5  | 1830 | 2808 | 0 |
| 299 | YNL061W | W | NOP2  | 2512 | 3810 | 0 |
| 300 | YNL063W | W |       | 1125 | 1760 | 0 |
| 301 | YNL149C | C |       | 1661 | 2246 | 0 |
| 302 | YNL151C | C | RPC31 | 1343 | 2072 | 0 |
| 303 | YNL153C | C | GIM3  | 1046 | 1563 | 0 |
| 304 | YNL155W | W |       | 1487 | 2730 | 0 |
| 305 | YNL157W | W |       | 1032 | 1689 | 0 |
| 306 | YNL159C | C | ASI2  | 675  | 926  | 0 |
| 307 | YNL245C | C |       | 1028 | 1560 | 0 |
| 308 | YNL247W | W |       | 2109 | 2819 | 0 |
| 309 | YNL249C | C | MPA43 | 869  | 1120 | 0 |
| 310 | YNL251C | C | NRD1  | 1269 | 1331 | 1 |
| 311 | YNL253W | W |       | 1103 | 1508 | 0 |

|     |         |   |        |      |      |   |
|-----|---------|---|--------|------|------|---|
| 312 | YNL255C | C | GIS2   | 2960 | 3808 | 0 |
| 313 | YNR002C | C | FUN34  | 554  | 660  | 0 |
| 314 | YNR004W | W |        | 486  | 561  | 0 |
| 315 | YNR006W | W | VPS27  | 700  | 1137 | 0 |
| 316 | YNR008W | W | LR01   | 842  | 1302 | 0 |
| 317 | YNR010W | W | CSE2   | 601  | 762  | 0 |
| 318 | YNR012W | W | URK1   | 887  | 1289 | 0 |
| 319 | YOL021C | C | DIS3   | 1016 | 1418 | 0 |
| 320 | YOL023W | W | IFM1   | 634  | 898  | 0 |
| 321 | YOL025W | W | LAG2   | 993  | 1668 | 0 |
| 322 | YOL027C | C |        | 1136 | 1868 | 0 |
| 323 | YOL029C | C |        | 1000 | 1477 | 0 |
| 324 | YOL031C | C |        | 874  | 1252 | 0 |
| 325 | YOL116W | W | MSN1   | 755  | 1036 | 0 |
| 326 | YOL118C | C |        | 460  | 577  | 0 |
| 327 | YOL120C | C | RPL18A | 5937 | 6139 | 0 |
| 328 | YOL122C | C | SMF1   | 837  | 1111 | 1 |
| 329 | YOL124C | C |        | 1139 | 1992 | 0 |
| 330 | YOL126C | C | MDH2   | 2692 | 1795 | 0 |
| 331 | YOR046C | C | DBP5   | 2677 | 4127 | 0 |
| 332 | YOR048C | C | RAT1   | 311  | 339  | 1 |
| 333 | YOR050C | C |        | 519  | 613  | 0 |
| 334 | YOR052C | C |        | 1065 | 2222 | 0 |
| 335 | YOR054C | C |        | 1054 | 1612 | 0 |
| 336 | YOR056C | C |        | 1783 | 3138 | 0 |
| 337 | YOR142W | W | LSC1   | 1832 | 2490 | 0 |
| 338 | YOR144C | C | EFD1   | 446  | 701  | 0 |
| 339 | YOR146W | W |        | 1188 | 2120 | 0 |
| 340 | YOR148C | C | SPP2   | 846  | 1343 | 0 |
| 341 | YOR150W | W | MRPL23 | 840  | 1102 | 0 |
| 342 | YOR152C | C |        | 723  | 971  | 0 |
| 343 | YOR238W | W |        | 574  | 875  | 0 |
| 344 | YOR240W |   |        | 1014 | 1690 | 0 |
| 345 | YOR242C | C | SSP2   | 517  | 674  | 0 |
| 346 | YOR244W | W | ESA1   | 768  | 1197 | 0 |
| 347 | YOR246C | C |        | 1318 | 1526 | 0 |
| 348 | YOR248W | W | TOS11  | 4177 | 3970 | 0 |
| 349 | YOR334W | W | MRS2   | 316  | 304  | 1 |
| 350 | YOR336W | W | KRE5   | 318  | 314  | 1 |
| 351 | YOR338W | W |        | 316  | 361  | 1 |
| 352 | YOR340C | C | RPA43  | 320  | 309  | 1 |
| 353 | YOR342C | C |        | 309  | 297  | 1 |
| 354 | YOR344C | C | TYE7   | 743  | 1522 | 0 |
| 355 | YPL036W | W | PMA2   | 398  | 410  | 1 |
| 356 | YPL038W | W | MET31  | 747  | 1136 | 0 |
| 357 | YPL040C | C | ISM1   | 403  | 463  | 1 |
| 358 | YPL042C | C | SSN3   | 400  | 465  | 1 |
| 359 | YPL044C | C |        | 1176 | 1691 | 0 |
| 360 | YPL046C | C | ELC1   | 1191 | 1277 | 1 |
| 361 | YPL132W | W | COX11  | 656  | 833  | 0 |
| 362 | YPL134C | C | ODC1   | 636  | 769  | 0 |
| 363 | YPL136W | W |        | 829  | 973  | 0 |

|     |         |   |        |      |      |   |
|-----|---------|---|--------|------|------|---|
| 364 | YPL138C | C | SPP1   | 896  | 1275 | 0 |
| 365 | YPL140C | C | MKK2   | 822  | 1046 | 0 |
| 366 | YPL142C | C |        | 2928 | 3791 | 0 |
| 367 | YPL228W | W | CET1   | 698  | 958  | 0 |
| 368 | YPL230W | W | USV1   | 495  | 618  | 0 |
| 369 | YPL232W | W | SS01   | 1487 | 2472 | 0 |
| 370 | YPL234C | C | TFP3   | 2655 | 3163 | 0 |
| 371 | YPL236C | C |        | 656  | 781  | 0 |
| 372 | YPL238C | C |        | 3633 | 4666 | 0 |
| 373 | YPR041W | W | TIF5   | 2668 | 4025 | 0 |
| 374 | YPR043W | W | RPL43A | 1919 | 2568 | 0 |
| 375 | YPR045C | C |        | 1304 | 1758 | 0 |
| 376 | YPR047W | W | MSF1   | 791  | 1107 | 0 |
| 377 | YPR049C | C | CVT9   | 525  | 814  | 0 |
| 378 | YPR051W | W | MAK3   | 1079 | 1280 | 0 |
| 379 | YPR137W | W | RRP9   | 1228 | 2184 | 0 |
| 380 | YPR139C | C |        | 1385 | 1826 | 0 |
| 381 | YPR141C | C | KAR3   | 1185 | 1613 | 0 |
| 382 | YPR143W | W |        | 2024 | 3116 | 0 |
| 383 | YPR145W | W | ASN1   | 5065 | 5108 | 0 |
| 384 | YPR147C | C |        | 605  | 751  | 1 |
| 385 | NORF 1  |   |        | 606  | 804  | 0 |
| 386 | NORF 5  |   |        | 385  | 474  | 0 |
| 387 | NORF 9  |   |        | 402  | 510  | 1 |
| 388 | NORF 13 |   |        | 712  | 1797 | 0 |
| 389 | NORF 17 |   |        | 648  | 1111 | 0 |
| 390 | NORF 21 |   |        | 729  | 1182 | 0 |
| 391 | YAL001C | C | TFC3   | 764  | 1078 | 0 |
| 392 | YAL020C | C | ATS1   | 457  | 503  | 0 |
| 393 | YAL056W | W | GPE2   | 416  | 577  | 0 |
| 394 | YAR035W | W | YAT1   | 807  | 1173 | 2 |
| 395 | YBL008W | W | HIR1   | 555  | 795  | 0 |
| 396 | YBL047C | C | EDE1   | 438  | 590  | 2 |
| 397 | YER013W | W | PRP22  | 814  | 1176 | 0 |
| 398 | YER054C | C | GIP2   | 594  | 809  | 0 |
| 399 | YER089C | C | PTC2   | 1752 | 2064 | 0 |
| 400 | YER134C | C |        | 1062 | 1353 | 0 |
| 401 | YER138C | C |        | 1352 | 1875 | 0 |
| 402 | YER172C | C | BRR2   | 2923 | 4450 | 4 |
| 403 | YKL014C | C |        | 1174 | 1658 | 1 |
| 404 | YKL166C | C | TPK3   | 1029 | 1546 | 0 |
| 405 | YKL194C | C | MST1   | 786  | 936  | 0 |
| 406 | YKL203C | C | TOR2   | 399  | 518  | 1 |
| 407 | YKR054C | C | DYN1   | 463  | 523  | 1 |
| 408 | YLL018C | C | DPS1   | 4890 | 6345 | 0 |
| 409 | YOR314W | W |        | 687  | 738  | 0 |
| 410 | YOR356W | W |        | 931  | 1730 | 0 |
| 411 | YOR383C | C | FIT3   | 618  | 829  | 2 |
| 412 | YPL009C | C |        | 997  | 1404 | 1 |
| 413 | YPL074W | W | YTA6   | 415  | 500  | 0 |
| 414 | YPL093W | W | NOG1   | 1251 | 2168 | 0 |
| 415 | YMR174C | C | PAI3   | 685  | 1362 | 0 |

|     |                     |       |       |       |      |   |
|-----|---------------------|-------|-------|-------|------|---|
| 416 | YER007C- <i>f</i> C |       | 1327  | 2002  | 0    |   |
| 417 | YML058C- <i>f</i> C |       | 848   | 995   | 0    |   |
| 418 | YMR324C             | C     | 481   | 556   | 0    |   |
| 419 | YIL082W- <i>f</i> W |       | 1501  | 2816  | 0    |   |
| 420 | YHR214C- <i>f</i> C |       | 7847  | 12436 | 0    |   |
| 421 | YDL045W- <i>f</i> W | MRP10 | 441   | 643   | 0    |   |
| 422 | YDR235W             | W     | PRP42 | 550   | 721  | 0 |
| 423 | YDR238C             | C     | SEC26 | 338   | 336  | 1 |
| 424 | YDR242W             | W     | AMD2  | 475   | 589  | 0 |
| 425 | YDR244W             | W     | PEX5  | 510   | 692  | 0 |
| 426 | YEL017C- <i>f</i> C |       | PMP2  | 1635  | 2219 | 0 |
| 427 | YAL024C             | C     | LTE1  | 329   | 330  | 0 |
| 428 | YAL065C             | C     |       | 441   | 494  | 0 |
| 429 | YBL017C             | C     | PEP1  | 429   | 447  | 0 |
| 430 | YBL085W             | W     | BOI1  | 405   | 501  | 0 |
| 431 | YDR039C             | C     | ENA2  | 543   | 689  | 0 |
| 432 | YDR127W             | W     | ARO1  | 410   | 473  | 0 |
| 433 | YOR373W             | W     | NUD1  | 388   | 479  | 1 |
| 434 | YPL016W             | W     | SWI1  | 402   | 467  | 0 |
| 435 | YPL180W             | W     | SHD7  | 850   | 1430 | 0 |
| 436 | YPR115W             | W     |       | 428   | 558  | 0 |
| 437 | YPR147C             | C     |       | 661   | 877  | 0 |
| 438 | YCL021W             |       |       | 3409  | 5610 | 2 |
| 439 | YJL036W             | W     | SNX4  | 910   | 1319 | 0 |
| 440 | YJL042W             | W     | MHP1  | 471   | 612  | 1 |
| 441 | YJL050W             | W     | MTR4  | 880   | 1347 | 0 |
| 442 | YJL061W             | W     | NUP82 | 708   | 955  | 0 |
| 443 | YJL094C             | C     | KHA1  | 421   | 476  | 0 |
| 444 | YJL120W             | W     |       | 595   | 706  | 0 |
| 445 | YOR371C             | C     | GPE1  | 463   | 619  | 0 |
| 446 | YOR384W             | W     | FRE5  | 752   | 853  | 0 |
| 447 | YPL007C             | C     | TFC8  | 710   | 940  | 0 |
| 448 | YPL022W             | W     | RAD1  | 561   | 807  | 0 |
| 449 | YPL032C             | C     | SVL3  | 1595  | 2028 | 0 |
| 450 | YPL039W             | W     |       | 386   | 454  | 0 |
| 451 | YCR001W             | W     |       | 316   | 317  | 0 |
| 452 | YCR024C- <i>f</i> C |       | PMP1  | 1717  | 2396 | 0 |
| 453 | YDL228C             | C     |       | 605   | 803  | 0 |
| 454 | YDL232W             | W     | OST4  | 769   | 1070 | 1 |
| 455 | YDL248W             | W     | COS7  | 1344  | 1684 | 0 |
| 456 | YDR017C             | C     | KCS1  | 2452  | 2074 | 0 |
| 457 | YAL002W             | W     | VPS8  | 417   | 496  | 0 |
| 458 | YAL017W             | W     | FUN31 | 436   | 563  | 0 |
| 459 | YAL023C             | C     | PMT2  | 942   | 1082 | 0 |
| 460 | YAL033W             | W     | POP5  | 546   | 636  | 0 |
| 461 | YAL053W             | W     |       | 430   | 537  | 1 |
| 462 | YAL063C             | C     | FL09  | 383   | 395  | 0 |
| 463 | EMPTY               |       |       | 290   | 255  | 0 |
| 464 | EMPTY               |       |       | 296   | 256  | 0 |
| 465 | EMPTY               |       |       | 302   | 255  | 0 |
| 466 | EMPTY               |       |       | 295   | 261  | 0 |
| 467 | EMPTY               |       |       | 304   | 276  | 0 |

|                   |     |      |   |
|-------------------|-----|------|---|
| 468 EMPTY         | 288 | 243  | 0 |
| 469 EMPTY         | 299 | 238  | 0 |
| 470 EMPTY         | 284 | 248  | 0 |
| 471 EMPTY         | 289 | 242  | 0 |
| 472 EMPTY         | 291 | 250  | 0 |
| 473 EMPTY         | 300 | 250  | 0 |
| 474 EMPTY         | 296 | 250  | 0 |
| 475 EMPTY         | 291 | 241  | 0 |
| 476 EMPTY         | 283 | 228  | 0 |
| 477 EMPTY         | 281 | 233  | 0 |
| 478 EMPTY         | 280 | 232  | 0 |
| 479 EMPTY         | 282 | 247  | 0 |
| 480 EMPTY         | 285 | 259  | 0 |
| 481 GENOMIC 1X    | 302 | 264  | 0 |
| 482 3XSSC         | 309 | 249  | 0 |
| 483 GENOMIC 0.5X  | 297 | 252  | 0 |
| 484 3XSSC         | 295 | 250  | 0 |
| 485 GENOMIC 0.25X | 294 | 258  | 0 |
| 486 3XSSC         | 281 | 251  | 0 |
| 487 EMPTY         | 284 | 270  | 0 |
| 488 EMPTY         | 288 | 261  | 0 |
| 489 EMPTY         | 317 | 281  | 0 |
| 490 EMPTY         | 281 | 254  | 0 |
| 491 EMPTY         | 288 | 257  | 0 |
| 492 EMPTY         | 315 | 277  | 0 |
| 493 EMPTY         | 288 | 239  | 0 |
| 494 EMPTY         | 291 | 243  | 0 |
| 495 EMPTY         | 291 | 245  | 0 |
| 496 EMPTY         | 289 | 246  | 0 |
| 497 EMPTY         | 345 | 496  | 0 |
| 498 EMPTY         | 315 | 259  | 0 |
| 499 EMPTY         | 288 | 242  | 0 |
| 500 EMPTY         | 289 | 237  | 0 |
| 501 EMPTY         | 301 | 246  | 0 |
| 502 EMPTY         | 299 | 255  | 0 |
| 503 EMPTY         | 284 | 243  | 0 |
| 504 EMPTY         | 285 | 238  | 0 |
| 505 GENOMIC 1X    | 667 | 1027 | 0 |
| 506 3XSSC         | 314 | 308  | 0 |
| 507 GENOMIC 0.5X  | 814 | 1268 | 0 |
| 508 3XSSC         | 286 | 260  | 0 |
| 509 GENOMIC 0.25X | 377 | 457  | 0 |
| 510 3XSSC         | 301 | 257  | 0 |
| 511 EMPTY         | 336 | 362  | 0 |
| 512 EMPTY         | 293 | 257  | 0 |
| 513 EMPTY         | 294 | 251  | 0 |
| 514 EMPTY         | 307 | 259  | 0 |
| 515 EMPTY         | 288 | 251  | 0 |
| 516 EMPTY         | 288 | 255  | 0 |
| 517 EMPTY         | 289 | 248  | 0 |
| 518 EMPTY         | 292 | 251  | 0 |
| 519 EMPTY         | 289 | 252  | 0 |

|     |            |   |           |      |      |   |
|-----|------------|---|-----------|------|------|---|
| 520 | EMPTY      |   | 303       | 253  | 0    |   |
| 521 | EMPTY      |   | 287       | 253  | 0    |   |
| 522 | EMPTY      |   | 288       | 240  | 0    |   |
| 523 | EMPTY      |   | 290       | 241  | 0    |   |
| 524 | EMPTY      |   | 282       | 233  | 0    |   |
| 525 | EMPTY      |   | 280       | 242  | 0    |   |
| 526 | EMPTY      |   | 290       | 234  | 0    |   |
| 527 | EMPTY      |   | 285       | 236  | 0    |   |
| 528 | EMPTY      |   | 288       | 229  | 0    |   |
| 529 | YBR171W    | W | SEC66     | 1769 | 2441 | 0 |
| 530 | YBR173C    | C | UMP1      | 1750 | 3017 | 0 |
| 531 | YBR175W    | W | SWD3      | 1597 | 1869 | 0 |
| 532 | YBR177C    | C | EHT1      | 865  | 1028 | 1 |
| 533 | YBR179C    | C | FZ01      | 2928 | 3816 | 0 |
| 534 | YBR181C    | C | RPS6B     | 8471 | 9881 | 0 |
| 535 | YBR267W    | W |           | 1604 | 3093 | 0 |
| 536 | YBR269C    | C |           | 1156 | 1756 | 0 |
| 537 | YBR271W    | W |           | 1156 | 1690 | 0 |
| 538 | YBR273C    | C |           | 1206 | 1937 | 0 |
| 539 | YBR275C    | C | RIF1      | 462  | 499  | 1 |
| 540 | YBR277C    | C |           | 964  | 1077 | 0 |
| 541 | YCL062W    |   |           | 1008 | 1049 | 0 |
| 542 | YCL064C    | C | CHA1      | 3153 | 8638 | 0 |
| 543 | YCL066W    | W | HMLALPHA1 | 553  | 530  | 0 |
| 544 | YCL068C    | C |           | 581  | 635  | 0 |
| 545 | YCL070/73C |   |           | 409  | 435  | 0 |
| 546 | YCL075W    | W |           | 468  | 445  | 0 |
| 547 | YCR070W    |   |           | 1994 | 2642 | 0 |
| 548 | YCR072C    | C |           | 1548 | 2522 | 0 |
| 549 | YCR074C    |   |           | 337  | 377  | 1 |
| 550 | YCR076C    | C |           | 949  | 1330 | 0 |
| 551 | YCR079W    | W |           | 754  | 835  | 0 |
| 552 | YCR081W    | W | SRB8      | 534  | 670  | 0 |
| 553 | YDL038C    | C |           | 426  | 465  | 0 |
| 554 | YDL040C    | C | NAT1      | 986  | 1445 | 0 |
| 555 | YDL042C    | C | SIR2      | 1107 | 1558 | 0 |
| 556 | YDL044C    | C | MTF2      | 844  | 1107 | 1 |
| 557 | YDL046W    | W |           | 2550 | 4085 | 0 |
| 558 | YDL048C    | C | STP4      | 1188 | 1264 | 0 |
| 559 | YDL134C    | C | PPH21     | 3252 | 4149 | 0 |
| 560 | YDL136W    | W | RPL35B    | 3209 | 4593 | 0 |
| 561 | YDL138W    | W | RGT2      | 624  | 704  | 1 |
| 562 | YDL140C    | C | RP021     | 2331 | 2464 | 0 |
| 563 | YDL142C    | C | CRD1      | 1032 | 1177 | 0 |
| 564 | YDL144C    | C |           | 454  | 500  | 1 |
| 565 | YDL230W    | W | PTP1      | 718  | 847  | 0 |
| 566 | YDL232W    | W | OST4      | 642  | 789  | 1 |
| 567 | YDL234C    | C | GYP7      | 600  | 758  | 0 |
| 568 | YDL236W    | W | PH013     | 1695 | 2518 | 0 |
| 569 | YDL238C    | C |           | 963  | 1209 | 0 |
| 570 | YDL240W    | W | LRG1      | 562  | 669  | 0 |
| 571 | YDR078C    | C |           | 772  | 945  | 0 |

|     |           |   |        |      |      |   |
|-----|-----------|---|--------|------|------|---|
| 572 | YDR080W   | W | VPS41  | 1076 | 1679 | 1 |
| 573 | YDR082W   | W | STN1   | 913  | 1102 | 0 |
| 574 | YDR084C   | C |        | 1753 | 2090 | 0 |
| 575 | YDR086C   | C | SSS1   | 2467 | 3380 | 0 |
| 576 | YDR088C   | C | SLU7   | 1058 | 1331 | 0 |
| 577 | YDR174W   | W | HM01   | 4563 | 7264 | 0 |
| 578 | YDR176W   | W | NGG1   | 1720 | 2341 | 0 |
| 579 | YDR178W   | W | SDH4   | 2004 | 1955 | 0 |
| 580 | YDR180W   | W | SCC2   | 536  | 642  | 0 |
| 581 | YDR182W   | W | CDC1   | 3088 | 3619 | 0 |
| 582 | YDR184C   | C | ATC1   | 1469 | 2474 | 0 |
| 583 | YDR273W   | W | DON1   | 997  | 1134 | 0 |
| 584 | YDR274C   | C |        | 368  | 422  | 0 |
| 585 | YDR275W   | W |        | 1152 | 1600 | 0 |
| 586 | YDR276C   | C | PMP3   | 1027 | 1379 | 0 |
| 587 | YDR278C   | C |        | 443  | 466  | 0 |
| 588 | YDR280W   | W | RRP45  | 1589 | 2239 | 0 |
| 589 | YDR366C   | C |        | 5016 | 6656 | 0 |
| 590 | YDR368W   | W | YPR1   | 2182 | 3505 | 0 |
| 591 | YDR370C   | C |        | 1416 | 1744 | 0 |
| 592 | YDR372C   | C |        | 1822 | 2471 | 0 |
| 593 | YDR374C   | C |        | 596  | 633  | 0 |
| 594 | YDR376W   | W | ARH1   | 1163 | 1574 | 0 |
| 595 | YDR462W   | W | MRPL28 | 662  | 1053 | 0 |
| 596 | YDR464W   | W | SPP41  | 522  | 728  | 1 |
| 597 | YDR466W   | W |        | 933  | 1360 | 0 |
| 598 | YDR468C   | C | TLG1   | 994  | 1527 | 0 |
| 599 | YDR470C   | C | UG01   | 799  | 994  | 0 |
| 600 | YDR472W   | W | TRS31  | 1073 | 1236 | 0 |
| 601 | YAL014C   | C |        | 667  | 879  | 0 |
| 602 | YAL016W   | W | TPD3   | 560  | 751  | 0 |
| 603 | YAL018C   | C |        | 357  | 371  | 0 |
| 604 | YAL020C   | C | ATS1   | 366  | 433  | 0 |
| 605 | YAL022C   | C | FUN26  | 529  | 743  | 0 |
| 606 | YAL024C   | C | LTE1   | 351  | 360  | 1 |
| 607 | YBL005W   | W | PDR3   | 5808 | 8745 | 0 |
| 608 | YBL005W-F | W |        | 648  | 883  | 0 |
| 609 | YBL007C   | C | SLA1   | 1364 | 2122 | 0 |
| 610 | YBL009W   | W |        | 771  | 953  | 0 |
| 611 | YBL011W   | W | SCT1   | 1697 | 2164 | 0 |
| 612 | YBL013W   | W | FMT1   | 476  | 441  | 0 |
| 613 | YBL099W   | W | ATP1   | 1755 | 2024 | 0 |
| 614 | YBL101C   | C | ECM21  | 732  | 1049 | 0 |
| 615 | YBL101W-F | W |        | 483  | 557  | 0 |
| 616 | YBL103C   | C | RTG3   | 758  | 853  | 0 |
| 617 | YBL105C   | C | PKC1   | 529  | 618  | 0 |
| 618 | YBL107C   | C |        | 871  | 1477 | 0 |
| 619 | YBR078W   | W | ECM33  | 3085 | 3234 | 0 |
| 620 | YBR080C   | C | SEC18  | 973  | 1411 | 0 |
| 621 | YBR082C   | C | UBC4   | 1539 | 3111 | 0 |
| 622 | YBR084C-F | C | RPL19A | 3520 | 4913 | 0 |
| 623 | YBR085W   | W | AAC3   | 1963 | 2570 | 0 |

|     |          |   |        |      |      |   |
|-----|----------|---|--------|------|------|---|
| 624 | YBR087W  | W | RFC5   | 1228 | 1413 | 0 |
| 625 | YEL013W  | W | VAC8   | 540  | 612  | 0 |
| 626 | YEL015W  | W |        | 883  | 1360 | 0 |
| 627 | YEL0171C |   |        | 884  | 1182 | 0 |
| 628 | YEL018W  | W |        | 1552 | 2287 | 0 |
| 629 | YEL020C  | C |        | 594  | 902  | 0 |
| 630 | YEL022W  | W | GEA2   | 457  | 714  | 0 |
| 631 | YER030W  | W |        | 2135 | 3878 | 0 |
| 632 | YER032W  | W | FIR1   | 1550 | 1977 | 0 |
| 633 | YER034W  | W |        | 864  | 1359 | 0 |
| 634 | YER036C  | C | KRE30  | 4826 | 6317 | 0 |
| 635 | YER038C  | C | KRE29  | 958  | 1670 | 0 |
| 636 | YER040W  | W | GLN3   | 1233 | 1538 | 0 |
| 637 | YER123W  | W | YCK3   | 1112 | 1463 | 0 |
| 638 | YER125W  | W | RSP5   | 3377 | 3688 | 0 |
| 639 | YER127W  | W | LCP5   | 1922 | 3462 | 0 |
| 640 | YER129W  | W | PAK1   | 2310 | 2671 | 0 |
| 641 | YER131W  | W | RPS26B | 5052 | 6378 | 0 |
| 642 | YER133W  | W | GLC7   | 2487 | 3240 | 0 |
| 643 | YFL026W  | W | STE2   | 7280 | 9151 | 0 |
| 644 | YFL028C  | C | CAF16  | 982  | 1144 | 0 |
| 645 | YFL030W  | W |        | 524  | 607  | 0 |
| 646 | YFL032W  | W |        | 917  | 952  | 0 |
| 647 | YFL034W  | W |        | 1029 | 1412 | 0 |
| 648 | YFL036W  | W | RP041  | 863  | 923  | 0 |
| 649 | YFR053C  | C | HXK1   | 1845 | 3426 | 0 |
| 650 | YFR055W  | W |        | 2088 | 2677 | 0 |
| 651 | YFR057W  | W |        | 365  | 377  | 1 |
| 652 | YGL002W  | W | ERP6   | 1429 | 1655 | 0 |
| 653 | YGL004C  | C |        | 836  | 1170 | 0 |
| 654 | YGL006W  | W | PMC1   | 872  | 991  | 0 |
| 655 | YGL092W  | W | NUP145 | 357  | 365  | 1 |
| 656 | YGL094C  | C | PAN2   | 671  | 842  | 0 |
| 657 | YGL096W  | W | TOS8   | 790  | 708  | 0 |
| 658 | YGL098W  | W |        | 803  | 1020 | 0 |
| 659 | YGL100W  | W | SEH1   | 1637 | 2318 | 0 |
| 660 | YGL102C  | C |        | 4879 | 5279 | 0 |
| 661 | YGL188C  | C |        | 841  | 779  | 0 |
| 662 | YGL190C  | C | CDC55  | 1381 | 1684 | 0 |
| 663 | YGL192W  | W | IME4   | 1406 | 1410 | 0 |
| 664 | YGL194C  | C | HOS2   | 859  | 1022 | 0 |
| 665 | YGL196W  | W |        | 803  | 1123 | 0 |
| 666 | YGL198W  | W |        | 1541 | 1832 | 0 |
| 667 | YGR021W  | W |        | 666  | 862  | 0 |
| 668 | YGR023W  | W | MTL1   | 864  | 1157 | 0 |
| 669 | YGR025W  | W |        | 846  | 942  | 0 |
| 670 | YGR027C  | C | RPS25A | 5336 | 6258 | 0 |
| 671 | YGR029W  | W | ERV1   | 750  | 1067 | 0 |
| 672 | YGR031W  | W |        | 692  | 998  | 0 |
| 673 | YGR117C  | C |        | 1066 | 1437 | 0 |
| 674 | YGR119C  | C | NUP57  | 1628 | 2345 | 0 |
| 675 | YGR121C  | C | MEP1   | 772  | 874  | 0 |

|     |         |   |        |      |      |   |
|-----|---------|---|--------|------|------|---|
| 676 | YGR123C | C | PPT1   | 1801 | 2038 | 0 |
| 677 | YGR125W | W |        | 790  | 1019 | 0 |
| 678 | YGR127W | W |        | 842  | 1129 | 0 |
| 679 | YGR213C | C | RTA1   | 519  | 621  | 0 |
| 680 | YGR215W | W | RSM27  | 989  | 1501 | 0 |
| 681 | YGR217W | W | CCH1   | 452  | 534  | 1 |
| 682 | YGR219W | W |        | 564  | 864  | 0 |
| 683 | YGR221C | C | TOS2   | 574  | 662  | 0 |
| 684 | YGR223C | C |        | 836  | 1050 | 0 |
| 685 | YHL013C | C |        | 966  | 1596 | 0 |
| 686 | YHL015W | W | RPS20  | 4456 | 5414 | 0 |
| 687 | YHL017W | W |        | 1397 | 1676 | 0 |
| 688 | YHL019C | C | APM2   | 795  | 1156 | 0 |
| 689 | YHL021C | C |        | 713  | 764  | 0 |
| 690 | YHL023C | C |        | 532  | 744  | 0 |
| 691 | YHR058C | C | MED6   | 710  | 965  | 0 |
| 692 | YHR060W | W | VMA22  | 1041 | 1619 | 0 |
| 693 | YHR062C | C | RPP1   | 860  | 1193 | 0 |
| 694 | YHR064C | C | SSZ1   | 4875 | 4540 | 0 |
| 695 | YHR066W | W | SSF1   | 1831 | 3542 | 0 |
| 696 | YHR068W | W | DYS1   | 3270 | 3351 | 0 |
| 697 | YHR152W | W | SP012  | 1420 | 2571 | 0 |
| 698 | YHR154W | W | ESC4   | 342  | 345  | 1 |
| 699 | YHR156C | C |        | 595  | 910  | 0 |
| 700 | YHR158C | C | KEL1   | 709  | 925  | 0 |
| 701 | YHR160C | C | PEX18  | 648  | 768  | 0 |
| 702 | YHR162W | W |        | 1623 | 2505 | 0 |
| 703 | YIL029C | C |        | 1028 | 1438 | 0 |
| 704 | YIL031W | W | ULP2   | 724  | 1037 | 0 |
| 705 | YIL033C | C | BCY1   | 1948 | 2845 | 0 |
| 706 | YIL035C | C | CKA1   | 1513 | 2371 | 0 |
| 707 | YIL037C | C | PRM2   | 490  | 562  | 0 |
| 708 | YIL039W | W |        | 1841 | 2388 | 0 |
| 709 | YIL126W | W | STH1   | 357  | 387  | 1 |
| 710 | YIL128W | W | MET18  | 962  | 1267 | 0 |
| 711 | YIL130W | W |        | 936  | 1447 | 0 |
| 712 | YIL132C | C | CSM2   | 612  | 706  | 0 |
| 713 | YIL134W | W | FLX1   | 673  | 762  | 0 |
| 714 | YIL136W | W | OM45   | 932  | 2229 | 0 |
| 715 | YJL001W | W | PRE3   | 1444 | 2588 | 0 |
| 716 | YJL003W | W |        | 724  | 908  | 0 |
| 717 | YJL005W | W | CYR1   | 321  | 361  | 1 |
| 718 | YJL007C | C |        | 415  | 468  | 0 |
| 719 | YJL009W | W |        | 1322 | 1932 | 0 |
| 720 | YJL011C | C |        | 380  | 451  | 1 |
| 721 | YJL098W | W | SAP185 | 402  | 589  | 0 |
| 722 | YJL100W | W | LSB6   | 602  | 823  | 0 |
| 723 | YJL102W | W | MEF2   | 600  | 731  | 0 |
| 724 | YJL104W | W | MIA1   | 1080 | 1879 | 0 |
| 725 | YJL106W | W | IME2   | 506  | 587  | 0 |
| 726 | YJL108C | C | PRM10  | 697  | 873  | 0 |
| 727 | YJL194W | W | CDC6   | 280  | 258  | 0 |

|     |          |   |       |       |      |   |
|-----|----------|---|-------|-------|------|---|
| 728 | YJL196C  | C | EL01  | 1644  | 2587 | 0 |
| 729 | YJL198W  | W | PH090 | 1173  | 1539 | 0 |
| 730 | YJL200C  | C |       | 1794  | 1829 | 0 |
| 731 | YJL202C  | C |       | 1305  | 1560 | 0 |
| 732 | YJL204C  | C |       | 799   | 1126 | 0 |
| 733 | YJR065C  | C | ARP3  | 2949  | 4196 | 0 |
| 734 | YJR067C  | C | YAE1  | 347   | 386  | 1 |
| 735 | YJR069C  | C | HAM1  | 1165  | 1722 | 0 |
| 736 | YJR071W  | W |       | 1273  | 1600 | 0 |
| 737 | YJR073C  | C | OPI3  | 1164  | 2684 | 0 |
| 738 | YJR075W  | W | HOC1  | 1683  | 2565 | 0 |
| 739 | YJR162C  | C |       | 518   | 531  | 0 |
| 740 | YKL002W  | W | DID4  | 874   | 1281 | 0 |
| 741 | YKL004W  | W | AUR1  | 1825  | 1978 | 0 |
| 742 | YKL006BC |   |       | 652   | 949  | 0 |
| 743 | YKL007W  | W | CAP1  | 1407  | 2513 | 0 |
| 744 | YKL009W  | W | MRT4  | 2075  | 2978 | 0 |
| 745 | YKL095W  | W | YJU2  | 659   | 857  | 0 |
| 746 | YKL097C  | C |       | 417   | 422  | 0 |
| 747 | YKL098W  | W |       | 722   | 991  | 0 |
| 748 | YKL100C  | C |       | 1155  | 1730 | 0 |
| 749 | YKL102C  | C |       | 452   | 521  | 0 |
| 750 | YKL104C  | C | GFA1  | 2178  | 3579 | 0 |
| 751 | YKL190W  | W | CNB1  | 1247  | 2195 | 0 |
| 752 | YKL192C  | C | ACP1  | 1985  | 3095 | 0 |
| 753 | YKL194C  | C | MST1  | 11657 | 8276 | 0 |
| 754 | YKL196C  | C | YKT6  | 1365  | 2117 | 0 |
| 755 | YKL198C  | C | PTK1  | 468   | 556  | 0 |
| 756 | YKL200C  |   |       | 751   | 953  | 0 |
| 757 | YKR061W  | W | KTR2  | 596   | 804  | 0 |
| 758 | YKR063C  | C | LAS1  | 711   | 1057 | 0 |
| 759 | YKR065C  | C |       | 1177  | 1721 | 0 |
| 760 | YKR067W  | W | GPT2  | 813   | 1240 | 0 |
| 761 | YKR069W  | W | MET1  | 372   | 440  | 0 |
| 762 | YKR071C  | C |       | 1375  | 2332 | 0 |
| 763 | YLL051C  | C | FRE6  | 699   | 843  | 0 |
| 764 | YLL053C  | C |       | 409   | 417  | 0 |
| 765 | YLL055W  | W |       | 509   | 554  | 0 |
| 766 | YLL057C  | C |       | 406   | 444  | 0 |
| 767 | YLL059C  | C |       | 342   | 340  | 0 |
| 768 | YLL061W  | W | MMP1  | 760   | 763  | 0 |
| 769 | YLR080W  | W |       | 386   | 553  | 0 |
| 770 | YLR082C  | C | SRL2  | 770   | 904  | 0 |
| 771 | YLR084C  | C | RAX2  | 1033  | 1316 | 0 |
| 772 | YLR086W  | W | SMC4  | 840   | 1129 | 0 |
| 773 | YLR088W  | W | GAA1  | 864   | 1074 | 0 |
| 774 | YLR090W  | W | XDJ1  | 824   | 1351 | 0 |
| 775 | YLR176C  | C | RFX1  | 593   | 680  | 0 |
| 776 | YLR178C  | C | TFS1  | 728   | 3718 | 0 |
| 777 | YLR180W  | W | SAM1  | 3667  | 3493 | 0 |
| 778 | YLR182W  | W | SWI6  | 922   | 1153 | 0 |
| 779 | YLR184W  | W |       | 344   | 319  | 0 |

|     |         |   |        |      |      |   |
|-----|---------|---|--------|------|------|---|
| 780 | YLR186W | W | EMG1   | 1376 | 1792 | 0 |
| 781 | YLR272C | C | YCS4   | 554  | 659  | 0 |
| 782 | YLR274W | W | CDC46  | 724  | 1033 | 0 |
| 783 | YLR276C | C | DBP9   | 1515 | 2508 | 0 |
| 784 | YLR278C | C |        | 358  | 385  | 2 |
| 785 | YLR280C | C |        | 324  | 305  | 0 |
| 786 | YLR282C | C |        | 649  | 792  | 0 |
| 787 | YLR368W | W |        | 698  | 958  | 0 |
| 788 | YLR370C | C | ARC18  | 1313 | 1839 | 0 |
| 789 | YLR372W | W | SUR4   | 3268 | 3040 | 0 |
| 790 | YLR374C | C |        | 614  | 699  | 0 |
| 791 | YLR376C | C |        | 514  | 610  | 0 |
| 792 | YLR378C | C | SEC61  | 3696 | 3812 | 0 |
| 793 | YLR464W | W |        | 1358 | 1467 | 2 |
| 794 | YLR466W | W | YRF1-4 | 798  | 1012 | 0 |
| 795 | YML001W | W | YPT7   | 941  | 1374 | 0 |
| 796 | YML003W | W |        | 307  | 363  | 1 |
| 797 | YML005W | W |        | 469  | 723  | 0 |
| 798 | YML007W | W | YAP1   | 407  | 599  | 0 |
| 799 | YML108W | W |        | 719  | 1040 | 0 |
| 800 | YML110C | C | COQ5   | 1669 | 3294 | 0 |
| 801 | YML112W | W | CTK3   | 617  | 883  | 0 |
| 802 | YML114C | C | TAF65  | 1168 | 1895 | 0 |
| 803 | YML116W | W | ATR1   | 769  | 935  | 0 |
| 804 | YML118W | W | NGL3   | 439  | 478  | 0 |
| 805 | YMR080C | C | NAM7   | 1137 | 1299 | 0 |
| 806 | YMR082C | C |        | 368  | 385  | 0 |
| 807 | YMR086W | W |        | 1082 | 1564 | 0 |
| 808 | YMR088C | C |        | 1164 | 1444 | 0 |
| 809 | YMR090W | W |        | 761  | 2380 | 0 |
| 810 | YMR092C | C | AIP1   | 1068 | 1880 | 0 |
| 811 | YMR187C | C |        | 569  | 696  | 2 |
| 812 | YMR189W | W | GCV2   | 274  | 256  | 1 |
| 813 | YMR191W | W |        | 874  | 1054 | 0 |
| 814 | YMR193W | W | MRPL24 | 993  | 1310 | 0 |
| 815 | YMR196W | W |        | 323  | 690  | 0 |
| 816 | YMR198W | W | CIK1   | 631  | 690  | 2 |
| 817 | YMR294W | W | JNM1   | 733  | 1035 | 0 |
| 818 | YMR296C | C | LCB1   | 2815 | 3568 | 0 |
| 819 | YMR298W | W |        | 1675 | 2179 | 0 |
| 820 | YMR300C | C | ADE4   | 1197 | 1571 | 0 |
| 821 | YMR302C | C | PRP12  | 775  | 1215 | 0 |
| 822 | YMR304W | W | UBP15  | 583  | 894  | 0 |
| 823 | YNL065W | W | BZR1   | 1088 | 1407 | 0 |
| 824 | YNL067W | W | RPL9B  | 3805 | 5169 | 0 |
| 825 | YNL069C | C | RPL16B | 4075 | 4144 | 0 |
| 826 | YNL071W | W | LAT1   | 833  | 1627 | 0 |
| 827 | YNL073W | W | MSK1   | 1021 | 1224 | 0 |
| 828 | YNL075W | W | IMP4   | 1314 | 1902 | 0 |
| 829 | YNL161W | W | CBK1   | 801  | 1212 | 0 |
| 830 | YNL163C | C | RIA1   | 687  | 991  | 2 |
| 831 | YNL165W | W |        | 560  | 768  | 0 |

|     |         |   |        |      |      |   |
|-----|---------|---|--------|------|------|---|
| 832 | YNL167C | C | SKO1   | 553  | 648  | 0 |
| 833 | YNL169C | C | PSD1   | 1076 | 1119 | 0 |
| 834 | YNL171C | C |        | 613  | 725  | 0 |
| 835 | YNL257C | C | SIP3   | 498  | 660  | 0 |
| 836 | YNL259C | C | ATX1   | 568  | 798  | 0 |
| 837 | YNL261W | W | ORC5   | 1025 | 1193 | 0 |
| 838 | YNL263C | C | YIF1   | 1478 | 1745 | 0 |
| 839 | YNL265C | C | IST1   | 695  | 927  | 0 |
| 840 | YNL267W | W | PIK1   | 1440 | 1838 | 0 |
| 841 | YNR014W | W |        | 553  | 556  | 0 |
| 842 | YNR016C | C | ACC1   | 402  | 374  | 1 |
| 843 | YNR018W | W |        | 2095 | 3561 | 0 |
| 844 | YNR020C | C |        | 498  | 589  | 0 |
| 845 | YNR022C | C |        | 923  | 1267 | 0 |
| 846 | YNR024W | W |        | 676  | 943  | 0 |
| 847 | YOL033W | W | MSE1   | 499  | 708  | 0 |
| 848 | YOL035C | C |        | 675  | 971  | 0 |
| 849 | YOL037C | C |        | 618  | 766  | 0 |
| 850 | YOL039W | W | RPP2A  | 3997 | 4344 | 0 |
| 851 | YOL041C | C | NOP12  | 309  | 296  | 1 |
| 852 | YOL043C | C | NTG2   | 518  | 632  | 0 |
| 853 | YOL128C | C |        | 704  | 888  | 0 |
| 854 | YOL130W | W | ALR1   | 884  | 1093 | 0 |
| 855 | YOL132W | W |        | 374  | 373  | 0 |
| 856 | YOL134C | C |        | 685  | 1062 | 0 |
| 857 | YOL136C | C | PFK27  | 1699 | 2204 | 0 |
| 858 | YOL138C | C |        | 380  | 461  | 0 |
| 859 | YOR058C | C | ASE1   | 831  | 951  | 0 |
| 860 | YOR060C | C |        | 641  | 802  | 0 |
| 861 | YOR062C | C |        | 290  | 251  | 1 |
| 862 | YOR064C | C | YNG1   | 660  | 750  | 0 |
| 863 | YOR066W | W |        | 1203 | 1685 | 0 |
| 864 | YOR068C | C |        | 498  | 578  | 0 |
| 865 | YOR154W | W |        | 813  | 1254 | 0 |
| 866 | YOR156C | C | NFI1   | 545  | 624  | 0 |
| 867 | YOR158W | W | PET123 | 948  | 1416 | 0 |
| 868 | YOR160W | W | MTR10  | 736  | 890  | 0 |
| 869 | YOR162C | C | YRR1   | 553  | 711  | 0 |
| 870 | YOR164C | C |        | 1959 | 2463 | 0 |
| 871 | YOR250C | C | CLP1   | 869  | 1032 | 0 |
| 872 | YOR252W | W |        | 844  | 1050 | 0 |
| 873 | YOR254C | C | SEC63  | 1249 | 1664 | 0 |
| 874 | YOR256C | C |        | 637  | 831  | 0 |
| 875 | YOR258W | W |        | 456  | 609  | 0 |
| 876 | YOR260W | W | GCD1   | 2357 | 3060 | 0 |
| 877 | YOR346W | W | REV1   | 287  | 271  | 1 |
| 878 | YOR348C | C | PUT4   | 320  | 312  | 0 |
| 879 | YOR350C | C | MNE1   | 412  | 447  | 0 |
| 880 | YOR352W | W |        | 433  | 525  | 0 |
| 881 | YOR354C | C | MSC6   | 321  | 369  | 0 |
| 882 | YOR356W | W |        | 326  | 326  | 1 |
| 883 | YPL048W | W | CAM1   | 3426 | 4190 | 0 |

|     |         |   |        |      |       |   |
|-----|---------|---|--------|------|-------|---|
| 884 | YPL050C | C | MNN9   | 1276 | 1777  | 0 |
| 885 | YPL052W | W |        | 474  | 570   | 0 |
| 886 | YPL054W | W | LEE1   | 348  | 295   | 0 |
| 887 | YPL056C | C |        | 347  | 327   | 0 |
| 888 | YPL058C | C | PDR12  | 289  | 248   | 1 |
| 889 | YPL144W | W |        | 327  | 351   | 1 |
| 890 | YPL146C | C |        | 1531 | 2559  | 0 |
| 891 | YPL148C | C | PPT2   | 586  | 706   | 0 |
| 892 | YPL150W | W |        | 396  | 478   | 0 |
| 893 | YPL152W | W | RRD2   | 594  | 834   | 0 |
| 894 | YPL154C | C | PEP4   | 2129 | 5699  | 0 |
| 895 | YPL240C | C | HSP82  | 5588 | 14236 | 0 |
| 896 | YPL242C | C | IQG1   | 407  | 487   | 0 |
| 897 | YPL244C | C | HUT1   | 1025 | 1145  | 0 |
| 898 | YPL246C | C |        | 1491 | 1748  | 0 |
| 899 | YPL248C | C | GAL4   | 377  | 396   | 1 |
| 900 | YPL250C | C | ICY2   | 518  | 520   | 0 |
| 901 | YPR053C | C |        | 1550 | 1409  | 0 |
| 902 | YPR055W | W | SEC8   | 526  | 607   | 0 |
| 903 | YPR057W | W | BRR1   | 863  | 1006  | 0 |
| 904 | YPR059C | C |        | 823  | 807   | 0 |
| 905 | YPR061C | C |        | 497  | 467   | 0 |
| 906 | YPR063C | C |        | 1763 | 2021  | 0 |
| 907 | YPR149W | W | NCE102 | 3732 | 5496  | 0 |
| 908 | YPR151C | C |        | 327  | 325   | 0 |
| 909 | YPR153W | W |        | 486  | 479   | 0 |
| 910 | YPR155C | C | NCA2   | 628  | 699   | 0 |
| 911 | YPR157W | W |        | 426  | 536   | 0 |
| 912 | YPR159W | W | KRE6   | 1713 | 2169  | 0 |
| 913 | NORF 2  |   |        | 865  | 1333  | 1 |
| 914 | NORF 6  |   |        | 350  | 361   | 0 |
| 915 | NORF 10 |   |        | 760  | 918   | 0 |
| 916 | NORF 14 |   |        | 1428 | 1282  | 0 |
| 917 | NORF 18 |   |        | 1135 | 1567  | 0 |
| 918 | NORF 22 |   |        | 567  | 626   | 0 |
| 919 | YBL066C | C | SEF1   | 1827 | 2387  | 0 |
| 920 | YBL097W | W | BRN1   | 1042 | 1467  | 2 |
| 921 | YBR038W | W | CHS2   | 572  | 600   | 0 |
| 922 | YBR058C | C | UBP14  | 920  | 1351  | 0 |
| 923 | YBR097W | W | VPS15  | 303  | 338   | 2 |
| 924 | YBR140C | C | IRA1   | 592  | 827   | 1 |
| 925 | YFL-TYA |   |        | 6202 | 10197 | 0 |
| 926 | YFL007W | W | BLM3   | 492  | 572   | 0 |
| 927 | YFL033C | C | RIM15  | 334  | 356   | 1 |
| 928 | YFR023W | W | PES4   | 537  | 718   | 2 |
| 929 | YFR040W | W | SAP155 | 575  | 679   | 0 |
| 930 | YFR057W | W |        | 311  | 263   | 0 |
| 931 | YLL040C | C | VPS13  | 632  | 976   | 1 |
| 932 | YLR007W | W |        | 651  | 954   | 0 |
| 933 | YLR067C | C | PET309 | 455  | 518   | 0 |
| 934 | YLR131C | C | ACE2   | 732  | 774   | 0 |
| 935 | YLR169W | W |        | 614  | 865   | 0 |

|     |                         |   |        |      |      |   |
|-----|-------------------------|---|--------|------|------|---|
| 936 | YLR206W                 | W | ENT2   | 1597 | 2254 | 0 |
| 937 | YPL127C                 | C | HH01   | 2652 | 2725 | 0 |
| 938 | YPL150W                 | W |        | 578  | 723  | 1 |
| 939 | YPL160W                 | W | CDC60  | 913  | 1083 | 0 |
| 940 | YPL167C                 | C | REV3   | 400  | 506  | 2 |
| 941 | YPL212C                 | C | PUS1   | 1246 | 2094 | 0 |
| 942 | YPL222W                 | W |        | 433  | 820  | 0 |
| 943 | YFL013W- <del>A</del> W |   |        | 309  | 334  | 0 |
| 944 | YOR304C- <del>A</del> C |   |        | 273  | 241  | 0 |
| 945 | YAR066W                 | W |        | 270  | 235  | 0 |
| 946 | YIL015C- <del>A</del> C |   |        | 276  | 255  | 0 |
| 947 | YLR287C- <del>A</del> C |   | RPS30A | 285  | 259  | 0 |
| 948 | YMR120C                 | C | ADE17  | 290  | 247  | 0 |
| 949 | YER019C- <del>A</del> C |   | SBH2   | 1474 | 1740 | 0 |
| 950 | YER060W- <del>A</del> W |   | FCY22  | 492  | 582  | 1 |
| 951 | YFL010W- <del>A</del> W |   | AUA1   | 1052 | 1929 | 0 |
| 952 | YFR031C- <del>A</del> C |   | RPL2A  | 5192 | 5071 | 0 |
| 953 | YHR143W- <del>A</del> W |   | RPC10  | 751  | 1151 | 0 |
| 954 | YLR287C- <del>A</del> C |   | RPS30A | 1138 | 1469 | 0 |
| 955 | YDR170C                 | C | SEC7   | 668  | 674  | 0 |
| 956 | YDR301W                 | W | CFT1   | 347  | 359  | 0 |
| 957 | YDR545W                 | W | YRF1-1 | 2737 | 3547 | 0 |
| 958 | YEL007W                 | W | TOS9   | 438  | 461  | 0 |
| 959 | YER111C                 | C | SWI4   | 366  | 478  | 0 |
| 960 | YER160C                 | C |        | 2120 | 2866 | 2 |
| 961 | YCR017C                 | C | CWH43  | 503  | 562  | 0 |
| 962 | YFR019W                 | W | FAB1   | 440  | 608  | 0 |
| 963 | YGL206C                 | C | CHC1   | 680  | 865  | 0 |
| 964 | YJL070C                 | C |        | 626  | 793  | 0 |
| 965 | YKL083W                 | W |        | 1672 | 2991 | 0 |
| 966 | YLR318W                 | W | EST2   | 395  | 441  | 0 |
| 967 | YJR059W                 | W | PTK2   | 1581 | 2069 | 2 |
| 968 | YJR121W                 | W | ATP2   | 1160 | 1225 | 0 |
| 969 | YKL032C                 | C | IXR1   | 1658 | 2183 | 2 |
| 970 | YKL092C                 | C | BUD2   | 703  | 848  | 0 |
| 971 | YKL113C                 | C | RAD27  | 1077 | 1476 | 0 |
| 972 | YKL197C                 | C | PEX1   | 545  | 758  | 0 |
| 973 | YPL042C                 | C | SSN3   | 560  | 692  | 0 |
| 974 | YPL058C                 | C | PDR12  | 279  | 252  | 1 |
| 975 | YPL089C                 | C | RLM1   | 455  | 648  | 0 |
| 976 | YPL137C                 | C |        | 434  | 589  | 1 |
| 977 | YPL171C                 | C | OYE3   | 328  | 305  | 0 |
| 978 | YPL247C                 | C |        | 504  | 500  | 0 |
| 979 | YDR030C                 | C | RAD28  | 382  | 520  | 0 |
| 980 | EMPTY                   |   |        | 253  | 212  | 0 |
| 981 | EMPTY                   |   |        | 250  | 228  | 0 |
| 982 | EMPTY                   |   |        | 237  | 211  | 0 |
| 983 | EMPTY                   |   |        | 249  | 212  | 0 |
| 984 | EMPTY                   |   |        | 264  | 226  | 0 |
| 985 | YAR014C                 | C | BUD14  | 276  | 235  | 0 |
| 986 | YAR019C                 | C | CDC15  | 312  | 262  | 0 |
| 987 | YAR050W                 | W | FL01   | 318  | 315  | 1 |

|                    |   |      |     |      |   |
|--------------------|---|------|-----|------|---|
| 988 YBL034C        | C | STU1 | 317 | 285  | 1 |
| 989 YBL071C        | C |      | 524 | 932  | 0 |
| 990 YBR081C        | C | SPT7 | 521 | 806  | 0 |
| 991 EMPTY          |   |      | 259 | 225  | 0 |
| 992 EMPTY          |   |      | 260 | 229  | 0 |
| 993 EMPTY          |   |      | 267 | 228  | 0 |
| 994 EMPTY          |   |      | 261 | 227  | 0 |
| 995 EMPTY          |   |      | 268 | 221  | 0 |
| 996 EMPTY          |   |      | 266 | 230  | 0 |
| 997 EMPTY          |   |      | 267 | 234  | 0 |
| 998 EMPTY          |   |      | 273 | 251  | 0 |
| 999 EMPTY          |   |      | 266 | 227  | 0 |
| 1000 EMPTY         |   |      | 262 | 224  | 0 |
| 1001 EMPTY         |   |      | 286 | 248  | 0 |
| 1002 EMPTY         |   |      | 287 | 228  | 0 |
| 1003 EMPTY         |   |      | 266 | 220  | 0 |
| 1004 EMPTY         |   |      | 264 | 219  | 0 |
| 1005 EMPTY         |   |      | 255 | 212  | 0 |
| 1006 EMPTY         |   |      | 252 | 212  | 0 |
| 1007 EMPTY         |   |      | 251 | 205  | 0 |
| 1008 EMPTY         |   |      | 256 | 217  | 0 |
| 1009 GENOMIC 1X    |   |      | 276 | 229  | 0 |
| 1010 3XSSC         |   |      | 282 | 250  | 0 |
| 1011 GENOMIC 0.5X  |   |      | 285 | 237  | 0 |
| 1012 3XSSC         |   |      | 278 | 246  | 0 |
| 1013 GENOMIC 0.25X |   |      | 277 | 246  | 0 |
| 1014 3XSSC         |   |      | 259 | 226  | 0 |
| 1015 EMPTY         |   |      | 263 | 246  | 0 |
| 1016 EMPTY         |   |      | 257 | 221  | 0 |
| 1017 EMPTY         |   |      | 257 | 219  | 0 |
| 1018 EMPTY         |   |      | 263 | 232  | 0 |
| 1019 EMPTY         |   |      | 268 | 225  | 0 |
| 1020 EMPTY         |   |      | 263 | 266  | 0 |
| 1021 EMPTY         |   |      | 266 | 230  | 0 |
| 1022 EMPTY         |   |      | 266 | 235  | 0 |
| 1023 EMPTY         |   |      | 269 | 232  | 0 |
| 1024 EMPTY         |   |      | 261 | 220  | 0 |
| 1025 EMPTY         |   |      | 270 | 237  | 0 |
| 1026 EMPTY         |   |      | 253 | 219  | 0 |
| 1027 EMPTY         |   |      | 263 | 215  | 0 |
| 1028 EMPTY         |   |      | 250 | 227  | 0 |
| 1029 EMPTY         |   |      | 259 | 228  | 0 |
| 1030 EMPTY         |   |      | 260 | 220  | 0 |
| 1031 EMPTY         |   |      | 251 | 215  | 0 |
| 1032 EMPTY         |   |      | 249 | 209  | 0 |
| 1033 GENOMIC 1X    |   |      | 707 | 998  | 0 |
| 1034 3XSSC         |   |      | 275 | 260  | 0 |
| 1035 GENOMIC 0.5X  |   |      | 838 | 1161 | 0 |
| 1036 3XSSC         |   |      | 265 | 241  | 0 |
| 1037 GENOMIC 0.25X |   |      | 424 | 525  | 0 |
| 1038 3XSSC         |   |      | 252 | 218  | 0 |
| 1039 EMPTY         |   |      | 280 | 236  | 0 |

|      |                         |         |      |      |   |
|------|-------------------------|---------|------|------|---|
| 1040 | EMPTY                   |         | 261  | 218  | 0 |
| 1041 | EMPTY                   |         | 262  | 229  | 0 |
| 1042 | EMPTY                   |         | 258  | 224  | 0 |
| 1043 | EMPTY                   |         | 254  | 224  | 0 |
| 1044 | EMPTY                   |         | 262  | 217  | 0 |
| 1045 | EMPTY                   |         | 265  | 233  | 0 |
| 1046 | EMPTY                   |         | 304  | 248  | 0 |
| 1047 | EMPTY                   |         | 264  | 234  | 0 |
| 1048 | EMPTY                   |         | 269  | 228  | 0 |
| 1049 | EMPTY                   |         | 263  | 219  | 0 |
| 1050 | EMPTY                   |         | 255  | 220  | 0 |
| 1051 | EMPTY                   |         | 261  | 223  | 0 |
| 1052 | EMPTY                   |         | 258  | 223  | 0 |
| 1053 | EMPTY                   |         | 248  | 219  | 0 |
| 1054 | EMPTY                   |         | 250  | 220  | 0 |
| 1055 | EMPTY                   |         | 246  | 208  | 0 |
| 1056 | EMPTY                   |         | 292  | 246  | 0 |
| 1057 | YBR161W                 | W       | 1279 | 1127 | 0 |
| 1058 | YBR162W- <del>A</del> W | YSY6    | 1836 | 2511 | 0 |
| 1059 | YBR164C                 | C ARL1  | 1799 | 2333 | 0 |
| 1060 | YBR166C                 | C TYR1  | 1461 | 1921 | 0 |
| 1061 | YBR168W                 | W       | 952  | 1125 | 0 |
| 1062 | YBR170C                 | C NPL4  | 1175 | 1681 | 0 |
| 1063 | YBR256C                 | C RIB5  | 1642 | 2212 | 0 |
| 1064 | YBR258C                 | C SHG1  | 715  | 848  | 0 |
| 1065 | YBR260C                 | C RGD1  | 880  | 1160 | 0 |
| 1066 | YBR262C                 | C       | 621  | 747  | 0 |
| 1067 | YBR264C                 | C YPT10 | 1429 | 1611 | 0 |
| 1068 | YBR266C                 | C       | 1658 | 2934 | 0 |
| 1069 | YCL051W                 | W LRE1  | 951  | 1041 | 0 |
| 1070 | YCL053C                 |         | 1674 | 2697 | 0 |
| 1071 | YCL055W                 | W KAR4  | 1238 | 2787 | 0 |
| 1072 | YCL057W                 | W PRD1  | 2484 | 3551 | 0 |
| 1073 | YCL059C                 | C KRR1  | 2777 | 3336 | 0 |
| 1074 | YCL061C                 | C MRC1  | 354  | 358  | 1 |
| 1075 | YCR059C                 | C YIH1  | 1442 | 1619 | 0 |
| 1076 | YCR061W                 | W       | 1247 | 2158 | 0 |
| 1077 | YCR063W                 | W BUD31 | 947  | 903  | 0 |
| 1078 | YCR065W                 | W HCM1  | 1964 | 2128 | 0 |
| 1079 | YCR067C                 | C SED4  | 1126 | 1240 | 1 |
| 1080 | YCR069W                 | W CPR4  | 2318 | 2660 | 0 |
| 1081 | YDL027C                 | C       | 1072 | 1317 | 0 |
| 1082 | YDL029W                 | W ARP2  | 2143 | 2962 | 0 |
| 1083 | YDL031W                 | W DBP10 | 675  | 910  | 1 |
| 1084 | YDL033C                 | C       | 336  | 327  | 0 |
| 1085 | YDL035C                 | C GPR1  | 308  | 269  | 1 |
| 1086 | YDL037C                 | C       | 299  | 261  | 0 |
| 1087 | YDL123W                 | W       | 967  | 1059 | 0 |
| 1088 | YDL125C                 | C HNT1  | 2263 | 2275 | 0 |
| 1089 | YDL127W                 | W PCL2  | 754  | 1423 | 0 |
| 1090 | YDL129W                 | W       | 717  | 661  | 0 |
| 1091 | YDL131W                 | W LYS21 | 6090 | 7247 | 0 |

|      |         |   |       |       |       |   |
|------|---------|---|-------|-------|-------|---|
| 1092 | YDL133W | W |       | 1283  | 1424  | 0 |
| 1093 | YDL219W | W |       | 929   | 1275  | 0 |
| 1094 | YDL221W | W |       | 825   | 1012  | 0 |
| 1095 | YDL223C | C |       | 502   | 1799  | 0 |
| 1096 | YDL225W | W | SHS1  | 1110  | 1785  | 0 |
| 1097 | YDL227C | C | HO    | 483   | 563   | 1 |
| 1098 | YDL229W | W | SSB1  | 448   | 592   | 1 |
| 1099 | YDR067C | C |       | 905   | 1048  | 0 |
| 1100 | YDR069C | C | DOA4  | 978   | 1265  | 0 |
| 1101 | YDR071C | C |       | 1855  | 2569  | 0 |
| 1102 | YDR073W | W | SNF11 | 1258  | 1194  | 0 |
| 1103 | YDR075W | W | PPH3  | 1139  | 1591  | 0 |
| 1104 | YDR077W | W | SED1  | 13827 | 19355 | 0 |
| 1105 | YDR163W | W |       | 1020  | 1447  | 0 |
| 1106 | YDR165W | W |       | 2980  | 3931  | 0 |
| 1107 | YDR167W | W | TAF25 | 1126  | 1466  | 0 |
| 1108 | YDR169C | C | STB3  | 1255  | 1646  | 0 |
| 1109 | YDR171W | W | HSP42 | 1136  | 1421  | 0 |
| 1110 | YDR173C | C | ARG82 | 983   | 1266  | 0 |
| 1111 | YDR267C | C |       | 1034  | 1296  | 0 |
| 1112 | YDR268W | W | MSW1  | 714   | 991   | 0 |
| 1113 | YDR269C | C |       | 529   | 542   | 0 |
| 1114 | YDR270W | W | CCC2  | 624   | 841   | 0 |
| 1115 | YDR271C | C |       | 691   | 902   | 1 |
| 1116 | YDR272W | W | GL02  | 1523  | 2765  | 0 |
| 1117 | YDR355C | C |       | 819   | 713   | 0 |
| 1118 | YDR357C | C |       | 2808  | 2608  | 0 |
| 1119 | YDR359C | C | VID21 | 1648  | 2262  | 0 |
| 1120 | YDR361C | C | BCP1  | 1845  | 2388  | 0 |
| 1121 | YDR363W | W | ESC2  | 1104  | 1359  | 0 |
| 1122 | YDR365C | C |       | 2719  | 4080  | 0 |
| 1123 | YDR451C | C | YHP1  | 1363  | 1342  | 0 |
| 1124 | YDR453C | C |       | 759   | 2133  | 0 |
| 1125 | YDR455C | C |       | 1204  | 1008  | 0 |
| 1126 | YDR457W | W | TOM1  | 383   | 424   | 1 |
| 1127 | YDR459C | C |       | 741   | 811   | 0 |
| 1128 | YDR461W | W | MFA1  | 2218  | 3730  | 0 |
| 1129 | YAL002W | W | VPS8  | 287   | 256   | 1 |
| 1130 | YAL004W | W |       | 284   | 270   | 1 |
| 1131 | YAL007C | C | ERP2  | 1347  | 1558  | 0 |
| 1132 | YAL009W | W | SP07  | 288   | 266   | 1 |
| 1133 | YAL011W | W |       | 356   | 409   | 0 |
| 1134 | YAL013W | W | DEP1  | 420   | 590   | 0 |
| 1135 | YAR064W | W |       | 464   | 539   | 0 |
| 1136 | YAR069C | C |       | 412   | 416   | 0 |
| 1137 | YAR071W | W | PH011 | 3431  | 6011  | 0 |
| 1138 | YAR074C |   |       | 1064  | 1056  | 0 |
| 1139 | YBL002W | W | HTB2  | 7941  | 6335  | 0 |
| 1140 | YBL004W | W |       | 338   | 328   | 1 |
| 1141 | YBL088C | C | TEL1  | 301   | 295   | 1 |
| 1142 | YBL090W | W | MRP21 | 889   | 1166  | 0 |
| 1143 | YBL092W | W | RPL32 | 2310  | 3079  | 0 |

|      |         |   |            |       |       |   |
|------|---------|---|------------|-------|-------|---|
| 1144 | YBL094C | C |            | 651   | 762   | 0 |
| 1145 | YBL096C | C |            | 673   | 672   | 0 |
| 1146 | YBL098W | W |            | 861   | 918   | 0 |
| 1147 | YBR067C | C | TIP1       | 2478  | 1930  | 0 |
| 1148 | YBR069C | C | TAT1       | 2955  | 2979  | 0 |
| 1149 | YBR071W | W |            | 1081  | 1416  | 0 |
| 1150 | YBR073W | W | RDH54      | 1050  | 1482  | 0 |
| 1151 | YBR075W | W |            | 1918  | 2425  | 0 |
| 1152 | YBR077C | C |            | 777   | 984   | 0 |
| 1153 | YEL002C | C | WBP1       | 2254  | 2722  | 0 |
| 1154 | YEL004W | W | YEA4       | 571   | 679   | 0 |
| 1155 | YEL006W | W |            | 355   | 317   | 1 |
| 1156 | YEL008W | W |            | 382   | 376   | 0 |
| 1157 | YEL010W | W |            | 413   | 415   | 0 |
| 1158 | YEL012W | W | UBC8       | 526   | 736   | 0 |
| 1159 | YER019W | W | ISC1       | 1380  | 1470  | 0 |
| 1160 | YER021W | W | RPN3       | 3395  | 4991  | 0 |
| 1161 | YER023W | W | PRO3       | 3574  | 4446  | 0 |
| 1162 | YER025W | W | GCD11      | 3921  | 5077  | 0 |
| 1163 | YER027C | C | GAL83      | 1548  | 2187  | 0 |
| 1164 | YER029C | C | SMB1       | 1158  | 1415  | 0 |
| 1165 | YER112W | W | LSM4       | 1450  | 1970  | 0 |
| 1166 | YER114C | C | BOI2       | 1153  | 1383  | 0 |
| 1167 | YER116C | C | SLX8       | 821   | 967   | 0 |
| 1168 | YER118C | C | SHO1       | 1707  | 2084  | 0 |
| 1169 | YER120W | W | SCS2       | 6542  | 7052  | 0 |
| 1170 | YER122C | C | GL03       | 8398  | 8291  | 0 |
| 1171 | YFL015C | C |            | 439   | 359   | 0 |
| 1172 | YFL017C | C | GNA1       | 1177  | 1373  | 0 |
| 1173 | YFL019C | C |            | 331   | 289   | 0 |
| 1174 | YFL021W | W | GAT1       | 1246  | 1399  | 0 |
| 1175 | YFL023W | W | FYV11      | 1327  | 2184  | 0 |
| 1176 | YFL025C | C | BST1       | 789   | 842   | 0 |
| 1177 | YFR042W | W |            | 858   | 1012  | 0 |
| 1178 | YFR044C | C |            | 5245  | 6710  | 0 |
| 1179 | YFR046C | C |            | 1121  | 1086  | 0 |
| 1180 | YFR048W | W |            | 864   | 1030  | 0 |
| 1181 | YFR050C | C | PRE4       | 2566  | 3575  | 0 |
| 1182 | YFR052W | W | RPN12      | 2395  | 3674  | 0 |
| 1183 | YGL081W | W |            | 454   | 572   | 0 |
| 1184 | YGL083W | W | SCY1       | 1054  | 1158  | 0 |
| 1185 | YGL085W | W |            | 681   | 791   | 0 |
| 1186 | YGL087C | C | MMS2       | 794   | 1300  | 0 |
| 1187 | YGL089C | C | MF (ALPHA) | 401   | 475   | 0 |
| 1188 | YGL091C | C | NBP35      | 913   | 1257  | 0 |
| 1189 | YGL177W | W |            | 482   | 465   | 0 |
| 1190 | YGL179C | C | TOS3       | 573   | 620   | 0 |
| 1191 | YGL181W | W | GTS1       | 995   | 1423  | 0 |
| 1192 | YGL183C | C | MND1       | 456   | 435   | 0 |
| 1193 | YGL185C | C |            | 886   | 1066  | 0 |
| 1194 | YGL187C | C | COX4       | 12228 | 13708 | 0 |
| 1195 | YGR010W | W |            | 1041  | 1167  | 0 |

|      |         |   |        |      |      |   |
|------|---------|---|--------|------|------|---|
| 1196 | YGR012W | W |        | 1045 | 1338 | 0 |
| 1197 | YGR014W | W | MSB2   | 3322 | 3468 | 0 |
| 1198 | YGR016W | W |        | 569  | 536  | 0 |
| 1199 | YGR018C | C |        | 948  | 1278 | 0 |
| 1200 | YGR020C | C | VMA7   | 1900 | 2403 | 0 |
| 1201 | YGR106C | C |        | 3315 | 3362 | 0 |
| 1202 | YGR108W | W | CLB1   | 1610 | 1987 | 0 |
| 1203 | YGR110W | W |        | 672  | 876  | 0 |
| 1204 | YGR112W | W | SHY1   | 689  | 874  | 0 |
| 1205 | YGR114C | C |        | 2261 | 2413 | 0 |
| 1206 | YGR116W | W | SPT6   | 469  | 540  | 2 |
| 1207 | YGR202C | C | PCT1   | 915  | 1279 | 0 |
| 1208 | YGR204W | W | ADE3   | 3005 | 4460 | 0 |
| 1209 | YGR206W | W |        | 657  | 856  | 0 |
| 1210 | YGR208W | W | SER2   | 1345 | 1921 | 0 |
| 1211 | YGR210C | C |        | 1604 | 2127 | 0 |
| 1212 | YGR212W | W |        | 518  | 624  | 0 |
| 1213 | YHL002W | W |        | 1303 | 1789 | 0 |
| 1214 | YHL004W | W | MRP4   | 1474 | 1848 | 0 |
| 1215 | YHL006C | C | SHU1   | 521  | 560  | 0 |
| 1216 | YHL008C | C |        | 972  | 1106 | 0 |
| 1217 | YHL010C | C |        | 388  | 460  | 0 |
| 1218 | YHL012W | W |        | 598  | 457  | 0 |
| 1219 | YHR047C | C | AAP1'  | 1349 | 1302 | 0 |
| 1220 | YHR049W | W |        | 2592 | 1973 | 0 |
| 1221 | YHR051W | W | COX6   | 1376 | 1533 | 0 |
| 1222 | YHR053C | C | CUP1-1 | 1208 | 1782 | 0 |
| 1223 | YHR055C | C | CUP1-2 | 1217 | 1691 | 0 |
| 1224 | YHR057C | C | CPR2   | 891  | 1405 | 0 |
| 1225 | YHR142W | W | CHS7   | 1185 | 1504 | 0 |
| 1226 | YHR143W | W | DSE2   | 3043 | 4718 | 0 |
| 1227 | YHR145C | C |        | 3796 | 5304 | 0 |
| 1228 | YHR147C | C | MRPL6  | 772  | 1038 | 0 |
| 1229 | YHR149C | C |        | 362  | 351  | 0 |
| 1230 | YHR151C | C |        | 1059 | 1194 | 1 |
| 1231 | YIL018W | W | RPL2B  | 9756 | 9609 | 0 |
| 1232 | YIL020C | C | HIS6   | 1060 | 1305 | 0 |
| 1233 | YIL022W | W | TIM44  | 1912 | 2922 | 0 |
| 1234 | YIL024C | C |        | 523  | 486  | 0 |
| 1235 | YIL026C | C | IRR1   | 1011 | 1518 | 0 |
| 1236 | YIL028W | W |        | 401  | 369  | 0 |
| 1237 | YIL115C | C | NUP159 | 579  | 660  | 2 |
| 1238 | YIL117C | C | PRM5   | 769  | 1617 | 0 |
| 1239 | YIL119C | C | RPI1   | 1652 | 1102 | 0 |
| 1240 | YIL121W | W |        | 2005 | 1065 | 0 |
| 1241 | YIL123W | W | SIM1   | 4828 | 4594 | 0 |
| 1242 | YIL125W | W | KGD1   | 2294 | 2699 | 0 |
| 1243 | YIR034C | C | LYS1   | 1045 | 1298 | 0 |
| 1244 | YIR036C | C |        | 885  | 1476 | 0 |
| 1245 | YIR038C | C | GTT1   | 1390 | 4651 | 0 |
| 1246 | YIR040C | C |        | 744  | 599  | 0 |
| 1247 | YIR042C | C |        | 497  | 464  | 0 |

|      |         |   |        |      |      |   |
|------|---------|---|--------|------|------|---|
| 1248 | YIR044C | C |        | 833  | 933  | 0 |
| 1249 | YJL087C | C | TRL1   | 458  | 629  | 0 |
| 1250 | YJL089W | W | SIP4   | 353  | 377  | 0 |
| 1251 | YJL091C | C |        | 1144 | 1255 | 0 |
| 1252 | YJL093C | C | TOK1   | 1116 | 1137 | 0 |
| 1253 | YJL095W | W | BCK1   | 691  | 860  | 0 |
| 1254 | YJL097W | W |        | 1852 | 2047 | 0 |
| 1255 | YJL183W | W | MNN11  | 2301 | 2439 | 0 |
| 1256 | YJL185C | C |        | 548  | 666  | 0 |
| 1257 | YJL187C | C | SWE1   | 1014 | 1419 | 0 |
| 1258 | YJL189W | W | RPL39  | 1309 | 1718 | 0 |
| 1259 | YJL191W | W | RPS14B | 3631 | 3893 | 0 |
| 1260 | YJL193W | W |        | 892  | 1002 | 0 |
| 1261 | YJR054W | W |        | 900  | 1337 | 0 |
| 1262 | YJR056C | C |        | 644  | 841  | 0 |
| 1263 | YJR058C | C | APS2   | 864  | 1050 | 0 |
| 1264 | YJR060W | W | CBF1   | 1073 | 1922 | 0 |
| 1265 | YJR062C | C | NTA1   | 478  | 571  | 0 |
| 1266 | YJR064W | W | CCT5   | 3122 | 4438 | 0 |
| 1267 | YJR151C | C | DAN4   | 595  | 886  | 2 |
| 1268 | YJR153W | W | PGU1   | 506  | 571  | 0 |
| 1269 | YJR155W | W | AAD10  | 643  | 765  | 0 |
| 1270 | YJR157W | W |        | 403  | 339  | 0 |
| 1271 | YJR159W | W | SOR1   | 492  | 510  | 0 |
| 1272 | YJR161C | C | COS5   | 2787 | 3544 | 0 |
| 1273 | YKL084W | W |        | 731  | 788  | 0 |
| 1274 | YKL086W | W |        | 444  | 495  | 1 |
| 1275 | YKL088W | W |        | 962  | 1391 | 0 |
| 1276 | YKL090W | W |        | 589  | 719  | 0 |
| 1277 | YKL092C | C | BUD2   | 903  | 1159 | 0 |
| 1278 | YKL094W | W | YJU3   | 1288 | 1956 | 0 |
| 1279 | YKL179C | C |        | 1042 | 1360 | 0 |
| 1280 | YKL181W | W | PRS1   | 3181 | 3239 | 0 |
| 1281 | YKL183W | W | LOT5   | 866  | 939  | 0 |
| 1282 | YKL185W | W | ASH1   | 2270 | 2475 | 0 |
| 1283 | YKL187C | C |        | 460  | 450  | 0 |
| 1284 | YKL189W | W | HYM1   | 601  | 760  | 0 |
| 1285 | YKR050W | W | TRK2   | 333  | 337  | 1 |
| 1286 | YKR052C | C | MRS4   | 613  | 620  | 0 |
| 1287 | YKR054C | C | DYN1   | 278  | 256  | 1 |
| 1288 | YKR056W | W | RNC1   | 1079 | 1861 | 0 |
| 1289 | YKR058W | W | GLG1   | 505  | 408  | 0 |
| 1290 | YKR060W | W |        | 848  | 1457 | 0 |
| 1291 | YLL040C | C | VPS13  | 524  | 464  | 1 |
| 1292 | YLL042C | C | APG10  | 428  | 390  | 0 |
| 1293 | YLL044W | W |        | 8195 | 8357 | 0 |
| 1294 | YLL046C | C | RNP1   | 424  | 371  | 0 |
| 1295 | YLL048C | C | YBT1   | 1045 | 1014 | 0 |
| 1296 | YLL050C | C | COF1   | 2112 | 3123 | 0 |
| 1297 | YLR069C | C | MEF1   | 660  | 934  | 0 |
| 1298 | YLR071C | C | RGR1   | 1170 | 1397 | 0 |
| 1299 | YLR073C | C |        | 1119 | 1474 | 0 |

|      |         |   |        |      |       |   |
|------|---------|---|--------|------|-------|---|
| 1300 | YLR075W | W | RPL10  | 8379 | 8955  | 0 |
| 1301 | YLR077W | W |        | 473  | 682   | 0 |
| 1302 | YLR079W | W | SIC1   | 1309 | 2181  | 0 |
| 1303 | YLR165C | C | PUS5   | 497  | 536   | 0 |
| 1304 | YLR167W | W | RPS31  | 6077 | 6918  | 0 |
| 1305 | YLR169W | W |        | 314  | 260   | 1 |
| 1306 | YLR171W | W |        | 763  | 990   | 0 |
| 1307 | YLR173W | W |        | 694  | 765   | 0 |
| 1308 | YLR175W | W | CBF5   | 6292 | 7327  | 0 |
| 1309 | YLR261C | C |        | 747  | 992   | 0 |
| 1310 | YLR263W | W | RED1   | 377  | 417   | 0 |
| 1311 | YLR265C | C | NEJ1   | 897  | 1154  | 0 |
| 1312 | YLR267W | W | BOP2   | 432  | 585   | 0 |
| 1313 | YLR269C | C |        | 845  | 1117  | 0 |
| 1314 | YLR271W | W |        | 619  | 759   | 0 |
| 1315 | YLR357W | W | RSC2   | 937  | 1172  | 0 |
| 1316 | YLR359W | W | ADE13  | 2764 | 2843  | 0 |
| 1317 | YLR361C | C |        | 891  | 1140  | 0 |
| 1318 | YLR363C | C | NMD4   | 805  | 914   | 0 |
| 1319 | YLR365W | W |        | 300  | 244   | 0 |
| 1320 | YLR367W | W | RPS22B | 2972 | 2803  | 0 |
| 1321 | YLR453C | C | RIF2   | 482  | 463   | 0 |
| 1322 | YLR455W | W |        | 1337 | 1441  | 0 |
| 1323 | YLR457C | C | NBP1   | 521  | 627   | 0 |
| 1324 | YLR459W | W | CDC91  | 1107 | 1206  | 0 |
| 1325 | YLR461W | W | PAU4   | 845  | 793   | 0 |
| 1326 | YLR463C | C |        | 1582 | 1484  | 0 |
| 1327 | YML097C | C | VPS9   | 979  | 1380  | 2 |
| 1328 | YML099C | C | ARG81  | 659  | 879   | 0 |
| 1329 | YML101C | C |        | 594  | 596   | 0 |
| 1330 | YML103C | C | NUP188 | 337  | 292   | 1 |
| 1331 | YML105C | C | SEC65  | 825  | 1258  | 0 |
| 1332 | YML107C | C |        | 248  | 221   | 0 |
| 1333 | YMR068W | W |        | 517  | 546   | 0 |
| 1334 | YMR070W | W | MOT3   | 1471 | 1887  | 0 |
| 1335 | YMR072W | W | ABF2   | 2048 | 2919  | 0 |
| 1336 | YMR074C | C |        | 1180 | 1748  | 0 |
| 1337 | YMR076C | C | PDS5   | 707  | 935   | 0 |
| 1338 | YMR078C | C | CTF18  | 948  | 1193  | 0 |
| 1339 | YMR176W | W | ECM5   | 341  | 245   | 1 |
| 1340 | YMR178W | W |        | 1047 | 1371  | 0 |
| 1341 | YMR180C | C | CTL1   | 621  | 753   | 0 |
| 1342 | YMR182C | C | RGM1   | 620  | 661   | 0 |
| 1343 | YMR184W | W |        | 757  | 1093  | 0 |
| 1344 | YMR186W | W | HSC82  | 6343 | 13975 | 0 |
| 1345 | YMR281W | W | GPI12  | 1059 | 1082  | 0 |
| 1346 | YMR283C | C | RIT1   | 775  | 889   | 0 |
| 1347 | YMR285C | C | NGL2   | 1002 | 1238  | 0 |
| 1348 | YMR288W | W | HSH155 | 689  | 980   | 0 |
| 1349 | YMR290C | C | HAS1   | 2351 | 2984  | 0 |
| 1350 | YMR293C | C |        | 602  | 648   | 0 |
| 1351 | YNL054W | W | VAC7   | 770  | 946   | 1 |

|      |         |   |        |      |      |   |
|------|---------|---|--------|------|------|---|
| 1352 | YNL056W | W |        | 1080 | 1384 | 0 |
| 1353 | YNL058C | C |        | 1592 | 2228 | 0 |
| 1354 | YNL060C |   |        | 1467 | 1849 | 0 |
| 1355 | YNL062C | C | GCD10  | 1037 | 1594 | 0 |
| 1356 | YNL064C | C | YDJ1   | 3890 | 6124 | 0 |
| 1357 | YNL150W | W |        | 1580 | 1886 | 0 |
| 1358 | YNL152W | W |        | 799  | 992  | 0 |
| 1359 | YNL154C | C | YCK2   | 2369 | 2866 | 0 |
| 1360 | YNL156C | C |        | 1302 | 1881 | 0 |
| 1361 | YNL158W | W |        | 585  | 672  | 0 |
| 1362 | YNL160W | W | YGP1   | 1318 | 5551 | 0 |
| 1363 | YNL246W | W |        | 1118 | 1600 | 0 |
| 1364 | YNL248C | C | RPA49  | 1328 | 1923 | 0 |
| 1365 | YNL250W | W | RAD50  | 581  | 928  | 0 |
| 1366 | YNL252C | C | MRPL17 | 1020 | 1478 | 0 |
| 1367 | YNL254C | C |        | 776  | 990  | 0 |
| 1368 | YNL256W | W | FOL1   | 1328 | 1495 | 0 |
| 1369 | YNR003C | C | RPC34  | 843  | 1113 | 0 |
| 1370 | YNR005C | C |        | 528  | 642  | 0 |
| 1371 | YNR007C | C | AUT1   | 435  | 527  | 0 |
| 1372 | YNR009W | W |        | 894  | 792  | 0 |
| 1373 | YNR011C | C | PRP2   | 458  | 654  | 0 |
| 1374 | YNR013C | C | PHO91  | 915  | 1088 | 0 |
| 1375 | YOL022C | C |        | 1212 | 1682 | 0 |
| 1376 | YOL024W | W |        | 494  | 573  | 0 |
| 1377 | YOL026C | C |        | 1154 | 1780 | 0 |
| 1378 | YOL028C | C | YAP7   | 807  | 980  | 0 |
| 1379 | YOL030W | W |        | 2748 | 2599 | 0 |
| 1380 | YOL032W | W |        | 561  | 651  | 0 |
| 1381 | YOL117W | W |        | 533  | 605  | 0 |
| 1382 | YOL119C | C |        | 949  | 1488 | 0 |
| 1383 | YOL121C | C | RPS19A | 3559 | 4380 | 0 |
| 1384 | YOL123W | W | HRP1   | 2935 | 2460 | 0 |
| 1385 | YOL125W | W |        | 774  | 992  | 0 |
| 1386 | YOL127W | W | RPL25  | 2728 | 3041 | 0 |
| 1387 | YOR047C | C | STD1   | 1186 | 1506 | 0 |
| 1388 | YOR049C | C |        | 604  | 558  | 0 |
| 1389 | YOR051C | C |        | 2092 | 2784 | 0 |
| 1390 | YOR053W | W |        | 1193 | 1953 | 0 |
| 1391 | YOR055W | W |        | 557  | 530  | 0 |
| 1392 | YOR057W | W | SGT1   | 1353 | 2111 | 0 |
| 1393 | YOR143C | C | THI80  | 787  | 1045 | 0 |
| 1394 | YOR145C | C |        | 1366 | 2303 | 0 |
| 1395 | YOR147W | W |        | 1198 | 1433 | 0 |
| 1396 | YOR149C | C | SMP3   | 762  | 866  | 0 |
| 1397 | YOR151C | C | RPB2   | 1663 | 2308 | 0 |
| 1398 | YOR153W | W | PDR5   | 1504 | 1737 | 0 |
| 1399 | YOR239W | W | ABP140 | 1519 | 2127 | 0 |
| 1400 | YOR241W | W | MET7   | 1246 | 1838 | 0 |
| 1401 | YOR243C | C |        | 1601 | 1973 | 0 |
| 1402 | YOR245C | C | DGA1   | 960  | 1168 | 0 |
| 1403 | YOR247W | W | SRL1   | 6770 | 5544 | 0 |

|      |         |   |        |      |      |   |
|------|---------|---|--------|------|------|---|
| 1404 | YOR249C | C | APC5   | 545  | 659  | 0 |
| 1405 | YOR335C | C | ALA1   | 264  | 230  | 1 |
| 1406 | YOR337W | W | TEA1   | 269  | 232  | 1 |
| 1407 | YOR339C | C | UBC11  | 267  | 215  | 1 |
| 1408 | YOR341W | W | RPA190 | 247  | 224  | 1 |
| 1409 | YOR343C | C |        | 273  | 252  | 0 |
| 1410 | YOR345C | C |        | 506  | 566  | 0 |
| 1411 | YPL037C | C | EGD1   | 3137 | 4168 | 0 |
| 1412 | YPL039W | W |        | 263  | 232  | 1 |
| 1413 | YPL041C | C |        | 582  | 565  | 0 |
| 1414 | YPL043W | W | NOP4   | 995  | 1647 | 0 |
| 1415 | YPL045W | W | VPS16  | 443  | 576  | 2 |
| 1416 | YPL047W | W |        | 635  | 587  | 1 |
| 1417 | YPL133C | C |        | 692  | 713  | 0 |
| 1418 | YPL135W | W | ISU1   | 1040 | 1703 | 0 |
| 1419 | YPL137C | C |        | 454  | 554  | 1 |
| 1420 | YPL139C | C | UME1   | 888  | 980  | 0 |
| 1421 | YPL141C | C |        | 908  | 1100 | 0 |
| 1422 | YPL143W | W | RPL33A | 1748 | 2293 | 0 |
| 1423 | YPL229W | W |        | 688  | 943  | 0 |
| 1424 | YPL231W | W | FAS2   | 1256 | 1535 | 1 |
| 1425 | YPL233W | W |        | 530  | 659  | 0 |
| 1426 | YPL235W | W | RVB2   | 2224 | 2942 | 2 |
| 1427 | YPL237W | W | SUI3   | 4425 | 5484 | 0 |
| 1428 | YPL239W | W | YAR1   | 1212 | 1875 | 0 |
| 1429 | YPR042C | C | PUF2   | 275  | 239  | 1 |
| 1430 | YPR044C | C |        | 1565 | 1869 | 0 |
| 1431 | YPR046W | W | MCM16  | 499  | 525  | 0 |
| 1432 | YPR048W | W | TAH18  | 900  | 1213 | 0 |
| 1433 | YPR050C | C |        | 795  | 840  | 0 |
| 1434 | YPR052C | C | NHP6A  | 628  | 562  | 0 |
| 1435 | YPR138C | C | MEP3   | 1404 | 1694 | 0 |
| 1436 | YPR140W | W |        | 909  | 1278 | 0 |
| 1437 | YPR142C | C |        | 1159 | 1588 | 0 |
| 1438 | YPR144C | C |        | 1547 | 2139 | 0 |
| 1439 | YPR146C | C |        | 800  | 895  | 0 |
| 1440 | YPR148C | C |        | 1894 | 3083 | 0 |
| 1441 | NORF 3  |   |        | 560  | 540  | 0 |
| 1442 | NORF 7  |   |        | 694  | 1367 | 1 |
| 1443 | NORF 11 |   |        | 441  | 575  | 0 |
| 1444 | NORF 15 |   |        | 314  | 264  | 0 |
| 1445 | NORF 19 |   |        | 406  | 356  | 0 |
| 1446 | NORF 23 |   |        | 643  | 797  | 0 |
| 1447 | YAL009W | W | SP07   | 650  | 781  | 0 |
| 1448 | YAL021C | C | CCR4   | 649  | 907  | 1 |
| 1449 | YAR009C | C |        | 3239 | 4975 | 0 |
| 1450 | YBL007C | C | SLA1   | 1063 | 1453 | 0 |
| 1451 | YBL022C | C | PIM1   | 1520 | 2619 | 0 |
| 1452 | YBL052C | C | SAS3   | 489  | 619  | 0 |
| 1453 | YER017C | C | AFG3   | 786  | 1111 | 0 |
| 1454 | YER060W | W | FCY21  | 558  | 658  | 2 |
| 1455 | YER093C | C |        | 487  | 637  | 0 |

|      |                         |   |        |      |      |   |
|------|-------------------------|---|--------|------|------|---|
| 1456 | YER137C                 | C |        | 455  | 635  | 0 |
| 1457 | YER155C                 | C | BEM2   | 500  | 587  | 2 |
| 1458 | YER183C                 | C | FAU1   | 244  | 187  | 1 |
| 1459 | YKL066W                 | W |        | 847  | 1168 | 0 |
| 1460 | YKL182W                 | W | FAS1   | 638  | 486  | 1 |
| 1461 | YKL195W                 | W |        | 1682 | 2655 | 0 |
| 1462 | YKR050W                 | W | TRK2   | 923  | 997  | 0 |
| 1463 | YKR072C                 | C | SIS2   | 1159 | 1671 | 2 |
| 1464 | YLL032C                 | C |        | 816  | 854  | 0 |
| 1465 | YOR349W                 | W | CIN1   | 537  | 571  | 0 |
| 1466 | YOR359W                 | W |        | 1514 | 2013 | 0 |
| 1467 | YPL008W                 | W | CHL1   | 482  | 557  | 0 |
| 1468 | YPL073C                 | C |        | 451  | 474  | 0 |
| 1469 | YPL085W                 | W | SEC16  | 378  | 443  | 1 |
| 1470 | YPL100W                 | W |        | 492  | 633  | 0 |
| 1471 | YMR175W                 | W | SIP18  | 317  | 552  | 0 |
| 1472 | YFR024C- <del>A</del> C |   | LSB3   | 1901 | 2793 | 0 |
| 1473 | YML009C                 | C | MRPL39 | 626  | 858  | 0 |
| 1474 | YMR254C                 | C |        | 311  | 286  | 0 |
| 1475 | YFL017W- <del>A</del> W |   | SMX2   | 490  | 595  | 0 |
| 1476 | YML086C                 | C | AL01   | 1981 | 2091 | 0 |
| 1477 | YDL134C-A               |   |        | 1064 | 1241 | 1 |
| 1478 | YDR237W                 | W | MRPL7  | 802  | 1034 | 0 |
| 1479 | YDR240C                 | C | SNU56  | 628  | 728  | 0 |
| 1480 | YDR243C                 | C | PRP28  | 501  | 596  | 0 |
| 1481 | YDR245W                 | W | MNN10  | 1859 | 2113 | 0 |
| 1482 | YEL059C- <del>A</del> C |   | SOM1   | 414  | 452  | 0 |
| 1483 | YAL051W                 | W | OAF1   | 353  | 339  | 0 |
| 1484 | YBL004W                 | W |        | 504  | 544  | 0 |
| 1485 | YBL079W                 | W | NUP170 | 770  | 1045 | 0 |
| 1486 | YBR275C                 | C | RIF1   | 354  | 360  | 0 |
| 1487 | YDR080W                 | W | VPS41  | 301  | 303  | 0 |
| 1488 | YDR166C                 | C | SEC5   | 353  | 385  | 0 |
| 1489 | YOR381W                 | W | FRE3   | 253  | 209  | 2 |
| 1490 | YPL082C                 | C | MOT1   | 323  | 309  | 0 |
| 1491 | YPR095C                 | C | SYT1   | 310  | 283  | 0 |
| 1492 | YPR122W                 | W | AXL1   | 308  | 304  | 2 |
| 1493 | YAL034W- <del>A</del> W |   | MTW1   | 379  | 325  | 0 |
| 1494 | YCL073C                 | C |        | 402  | 366  | 0 |
| 1495 | YJL039C                 | C | NUP192 | 280  | 219  | 1 |
| 1496 | YJL049W                 | W |        | 728  | 825  | 0 |
| 1497 | YJL060W                 | W |        | 1443 | 1658 | 0 |
| 1498 | YJL078C                 | C | PRY3   | 1517 | 1107 | 0 |
| 1499 | YJL099W                 | W | CHS6   | 489  | 543  | 2 |
| 1500 | YJL205C- <del>A</del> C |   | NCE101 | 421  | 479  | 1 |
| 1501 | YOR380W                 | W |        | 541  | 490  | 0 |
| 1502 | YPL005W                 | W |        | 339  | 347  | 0 |
| 1503 | YPL012W                 | W | RRP12  | 853  | 1155 | 0 |
| 1504 | YPL030W                 | W |        | 554  | 817  | 0 |
| 1505 | YPL036W                 | W | PMA2   | 900  | 799  | 0 |
| 1506 | YPL040C                 | C | ISM1   | 387  | 425  | 0 |
| 1507 | YCR020C                 | C | PET18  | 734  | 707  | 2 |

|      |               |   |       |      |      |   |
|------|---------------|---|-------|------|------|---|
| 1508 | YDL227C       | C | HO    | 358  | 355  | 1 |
| 1509 | YDL229W       | W | SSB1  | 385  | 443  | 1 |
| 1510 | YDL239W       |   |       | 392  | 424  | 0 |
| 1511 | YDR011W       | W | SNQ2  | 1122 | 1163 | 0 |
| 1512 | YDR028C       | C | REG1  | 1634 | 2044 | 0 |
| 1513 | YAL004W       | W |       | 3162 | 6348 | 0 |
| 1514 | YAL019W       | W | FUN30 | 557  | 841  | 0 |
| 1515 | YAL029C       | C | MY04  | 695  | 890  | 1 |
| 1516 | YAL035W       | W | FUN12 | 1745 | 2839 | 0 |
| 1517 | YAL058W       | W | CNE1  | 237  | 201  | 1 |
| 1518 | YAR002AC      |   |       | 362  | 329  | 1 |
| 1519 | EMPTY         |   |       | 265  | 194  | 0 |
| 1520 | EMPTY         |   |       | 255  | 192  | 0 |
| 1521 | EMPTY         |   |       | 253  | 196  | 0 |
| 1522 | EMPTY         |   |       | 238  | 189  | 0 |
| 1523 | EMPTY         |   |       | 247  | 197  | 0 |
| 1524 | EMPTY         |   |       | 255  | 191  | 0 |
| 1525 | EMPTY         |   |       | 249  | 201  | 0 |
| 1526 | EMPTY         |   |       | 269  | 238  | 0 |
| 1527 | EMPTY         |   |       | 247  | 197  | 0 |
| 1528 | EMPTY         |   |       | 256  | 195  | 0 |
| 1529 | EMPTY         |   |       | 245  | 197  | 0 |
| 1530 | EMPTY         |   |       | 255  | 190  | 0 |
| 1531 | EMPTY         |   |       | 268  | 196  | 0 |
| 1532 | EMPTY         |   |       | 250  | 190  | 0 |
| 1533 | EMPTY         |   |       | 253  | 188  | 0 |
| 1534 | EMPTY         |   |       | 252  | 186  | 0 |
| 1535 | EMPTY         |   |       | 284  | 230  | 0 |
| 1536 | EMPTY         |   |       | 252  | 229  | 0 |
| 1537 | GENOMIC 1X    |   |       | 245  | 188  | 0 |
| 1538 | 3XSSC         |   |       | 248  | 194  | 0 |
| 1539 | GENOMIC 0.5X  |   |       | 252  | 214  | 0 |
| 1540 | 3XSSC         |   |       | 258  | 206  | 0 |
| 1541 | GENOMIC 0.25X |   |       | 240  | 186  | 0 |
| 1542 | 3XSSC         |   |       | 235  | 195  | 0 |
| 1543 | EMPTY         |   |       | 251  | 194  | 0 |
| 1544 | EMPTY         |   |       | 258  | 201  | 0 |
| 1545 | EMPTY         |   |       | 269  | 208  | 0 |
| 1546 | EMPTY         |   |       | 242  | 193  | 0 |
| 1547 | EMPTY         |   |       | 279  | 209  | 0 |
| 1548 | EMPTY         |   |       | 261  | 200  | 0 |
| 1549 | EMPTY         |   |       | 255  | 195  | 0 |
| 1550 | EMPTY         |   |       | 249  | 189  | 0 |
| 1551 | EMPTY         |   |       | 258  | 188  | 0 |
| 1552 | EMPTY         |   |       | 257  | 195  | 0 |
| 1553 | EMPTY         |   |       | 273  | 198  | 0 |
| 1554 | EMPTY         |   |       | 242  | 190  | 0 |
| 1555 | EMPTY         |   |       | 254  | 202  | 0 |
| 1556 | EMPTY         |   |       | 251  | 187  | 0 |
| 1557 | EMPTY         |   |       | 249  | 190  | 0 |
| 1558 | EMPTY         |   |       | 265  | 188  | 0 |
| 1559 | EMPTY         |   |       | 246  | 184  | 0 |

|      |               |   |           |      |      |   |
|------|---------------|---|-----------|------|------|---|
| 1560 | EMPTY         |   |           | 242  | 187  | 0 |
| 1561 | GENOMIC 1X    |   |           | 570  | 731  | 0 |
| 1562 | 3XSSC         |   |           | 270  | 215  | 0 |
| 1563 | GENOMIC 0.5X  |   |           | 520  | 638  | 0 |
| 1564 | 3XSSC         |   |           | 262  | 207  | 0 |
| 1565 | GENOMIC 0.25X |   |           | 382  | 430  | 0 |
| 1566 | 3XSSC         |   |           | 258  | 220  | 0 |
| 1567 | EMPTY         |   |           | 243  | 198  | 0 |
| 1568 | EMPTY         |   |           | 754  | 304  | 0 |
| 1569 | EMPTY         |   |           | 255  | 201  | 0 |
| 1570 | EMPTY         |   |           | 253  | 191  | 0 |
| 1571 | EMPTY         |   |           | 247  | 202  | 0 |
| 1572 | EMPTY         |   |           | 253  | 207  | 0 |
| 1573 | EMPTY         |   |           | 247  | 197  | 0 |
| 1574 | EMPTY         |   |           | 250  | 200  | 0 |
| 1575 | EMPTY         |   |           | 247  | 193  | 0 |
| 1576 | EMPTY         |   |           | 255  | 198  | 0 |
| 1577 | EMPTY         |   |           | 252  | 197  | 0 |
| 1578 | EMPTY         |   |           | 238  | 186  | 0 |
| 1579 | EMPTY         |   |           | 257  | 186  | 0 |
| 1580 | EMPTY         |   |           | 250  | 194  | 0 |
| 1581 | EMPTY         |   |           | 248  | 189  | 0 |
| 1582 | EMPTY         |   |           | 249  | 180  | 0 |
| 1583 | EMPTY         |   |           | 246  | 182  | 0 |
| 1584 | EMPTY         |   |           | 251  | 185  | 0 |
| 1585 | YBR172C       | C | SMY2      | 2376 | 3527 | 0 |
| 1586 | YBR174C       | C |           | 618  | 615  | 0 |
| 1587 | YBR176W       | W | ECM31     | 872  | 1064 | 0 |
| 1588 | YBR178W       | W |           | 603  | 498  | 0 |
| 1589 | YBR180W       | W | DTR1      | 379  | 368  | 0 |
| 1590 | YBR182C       | C | SMP1      | 516  | 496  | 0 |
| 1591 | YBR268W       | W | MRPL37    | 1043 | 1486 | 0 |
| 1592 | YBR270C       | C |           | 626  | 740  | 0 |
| 1593 | YBR272C       | C | HSM3      | 479  | 678  | 0 |
| 1594 | YBR274W       | W | CHK1      | 1273 | 1389 | 0 |
| 1595 | YBR276C       | C | PPS1      | 1160 | 1544 | 0 |
| 1596 | YBR278W       | W | DPB3      | 863  | 1066 | 0 |
| 1597 | YCL063W       | W |           | 989  | 849  | 0 |
| 1598 | YCL065W       | W |           | 738  | 854  | 0 |
| 1599 | YCL067C       | C | HMLALPHA2 | 1285 | 1710 | 0 |
| 1600 | YCL069W       | W |           | 612  | 595  | 0 |
| 1601 | YCL074W       | W |           | 444  | 331  | 0 |
| 1602 | YCL076W       | W |           | 468  | 358  | 0 |
| 1603 | YCR071C       | C | IMG2      | 1092 | 1205 | 0 |
| 1604 | YCR073C       | C | SSK22     | 450  | 484  | 0 |
| 1605 | YCR075C       | C | ERS1      | 996  | 896  | 0 |
| 1606 | YCR077C       | C | PAT1      | 3415 | 3019 | 0 |
| 1607 | YCR080W       |   |           | 921  | 901  | 0 |
| 1608 | YCR082W       | W |           | 1391 | 2156 | 0 |
| 1609 | YDL039C       | C | PRM7      | 510  | 879  | 0 |
| 1610 | YDL041W       | W | KRE26     | 1066 | 1268 | 0 |
| 1611 | YDL043C       | C | PRP11     | 929  | 1343 | 0 |

|      |                     |   |        |      |      |   |
|------|---------------------|---|--------|------|------|---|
| 1612 | YDL045C             | C | FAD1   | 734  | 1069 | 0 |
| 1613 | YDL047W             | W | SIT4   | 1637 | 2418 | 0 |
| 1614 | YDL049C             | C | KNH1   | 417  | 519  | 0 |
| 1615 | YDL135C             | C | RDI1   | 2465 | 4194 | 0 |
| 1616 | YDL137W             | W | ARF2   | 3909 | 6350 | 0 |
| 1617 | YDL139C             | C | SCM3   | 1546 | 2009 | 0 |
| 1618 | YDL141W             | W | BPL1   | 1945 | 1931 | 0 |
| 1619 | YDL143W             | W | CCT4   | 2155 | 3619 | 0 |
| 1620 | YDL145C             | C | COP1   | 434  | 452  | 1 |
| 1621 | YDL231C             | C | BRE4   | 526  | 585  | 0 |
| 1622 | YDL233W             | W |        | 660  | 781  | 0 |
| 1623 | YDL235C             | C | YPD1   | 533  | 689  | 0 |
| 1624 | YDL237W             | W |        | 1638 | 2166 | 0 |
| 1625 | YDL239C             | C | ADY3   | 395  | 389  | 1 |
| 1626 | YDL241W             | W |        | 392  | 371  | 0 |
| 1627 | YDR079W             | W | PET100 | 888  | 1105 | 0 |
| 1628 | YDR081C             | C | PDC2   | 1030 | 1368 | 0 |
| 1629 | YDR083W             | W | RRP8   | 2694 | 3445 | 0 |
| 1630 | YDR085C             | C | AFR1   | 946  | 1120 | 0 |
| 1631 | YDR087C             | C | RRP1   | 1670 | 2036 | 0 |
| 1632 | YDR089W             | W |        | 1475 | 1239 | 0 |
| 1633 | YDR175C             | C | RSM24  | 1218 | 1434 | 0 |
| 1634 | YDR177W             | W | UBC1   | 1847 | 2721 | 0 |
| 1635 | YDR179C             | C |        | 682  | 801  | 0 |
| 1636 | YDR181C             | C | SAS4   | 1088 | 1324 | 0 |
| 1637 | YDR183W             | W | PLP1   | 706  | 1007 | 0 |
| 1638 | YDR185C             | C |        | 630  | 561  | 0 |
| 1639 | YDR273W             | W | DON1   | 618  | 670  | 0 |
| 1640 | YDR274C             | C |        | 815  | 1049 | 0 |
| 1641 | YDR275W             | W |        | 930  | 1170 | 0 |
| 1642 | YDR277C             | C | MTH1   | 685  | 561  | 0 |
| 1643 | YDR279W             | W |        | 1017 | 1292 | 0 |
| 1644 | YDR281C             | C | PHM6   | 687  | 589  | 0 |
| 1645 | YDR367W             | W |        | 1510 | 1537 | 0 |
| 1646 | YDR369C             | C | XRS2   | 810  | 1017 | 0 |
| 1647 | YDR371W             | W | CTS2   | 1202 | 1534 | 0 |
| 1648 | YDR373W             | W | FRQ1   | 1569 | 1982 | 0 |
| 1649 | YDR375C             | C | BCS1   | 1041 | 1161 | 0 |
| 1650 | YDR377W             | W | ATP17  | 2200 | 2224 | 0 |
| 1651 | YDR463W             | W | STP1   | 1603 | 2300 | 0 |
| 1652 | YDR465C             | C | RMT2   | 1617 | 2201 | 0 |
| 1653 | YDR467C             | C |        | 1287 | 1618 | 0 |
| 1654 | YDR469W             | W | SDC1   | 1297 | 1629 | 0 |
| 1655 | YDR471W             | W | RPL27B | 3674 | 4762 | 0 |
| 1656 | YDR473C             | C | PRP3   | 995  | 1310 | 0 |
| 1657 | YAL015C             | C | NTG1   | 409  | 538  | 0 |
| 1658 | YAL017W             | W | FUN31  | 278  | 245  | 1 |
| 1659 | YAL019W             | W | FUN30  | 293  | 240  | 1 |
| 1660 | YAL021C             | C | CCR4   | 280  | 222  | 1 |
| 1661 | YAL023C             | C | PMT2   | 288  | 252  | 1 |
| 1662 | YAL025C             | C | MAK16  | 678  | 1462 | 0 |
| 1663 | YBL005W- <i>F</i> W |   |        | 1779 | 2770 | 0 |

|      |                         |   |        |      |       |   |
|------|-------------------------|---|--------|------|-------|---|
| 1664 | YBL006C                 | C |        | 1273 | 1678  | 0 |
| 1665 | YBL008W                 | W | HIR1   | 275  | 233   | 1 |
| 1666 | YBL010C                 | C |        | 654  | 893   | 0 |
| 1667 | YBL012C                 | C |        | 1054 | 1084  | 0 |
| 1668 | YBL014C                 | C | RRN6   | 488  | 630   | 0 |
| 1669 | YBL100C                 | C |        | 2503 | 2974  | 0 |
| 1670 | YBL101W- <del>F</del> W |   |        | 7879 | 12604 | 0 |
| 1671 | YBL102W                 | W | SFT2   | 1915 | 2369  | 0 |
| 1672 | YBL104C                 | C |        | 383  | 472   | 0 |
| 1673 | YBL106C                 | C | SR077  | 4803 | 5379  | 0 |
| 1674 | YBL108W                 | W |        | 382  | 308   | 0 |
| 1675 | YBR079C                 | C | RPG1   | 1999 | 2367  | 0 |
| 1676 | YBR081C                 | C | SPT7   | 845  | 1683  | 2 |
| 1677 | YBR083W                 | W | TEC1   | 1610 | 3230  | 0 |
| 1678 | YBR084W                 | W | MIS1   | 2860 | 3154  | 0 |
| 1679 | YBR086C                 | C | IST2   | 2593 | 2700  | 2 |
| 1680 | YBR088C                 | C | POL30  | 1245 | 2011  | 0 |
| 1681 | YEL014C                 | C |        | 639  | 753   | 0 |
| 1682 | YEL016C                 | C |        | 626  | 675   | 0 |
| 1683 | YEL017W                 | W |        | 1109 | 1195  | 0 |
| 1684 | YEL019C                 | C | MMS21  | 474  | 522   | 0 |
| 1685 | YEL021W                 | W | URA3   | 2523 | 2079  | 0 |
| 1686 | YEL023C                 | C |        | 405  | 450   | 0 |
| 1687 | YER031C                 | C | YPT31  | 3443 | 4857  | 0 |
| 1688 | YER033C                 | C | ZRG8   | 533  | 666   | 0 |
| 1689 | YER035W                 | W | EDC2   | 1199 | 1892  | 0 |
| 1690 | YER037W                 | W | PHM8   | 854  | 1952  | 0 |
| 1691 | YER039C                 | C | HVG1   | 603  | 595   | 0 |
| 1692 | YER041W                 | W | YEN1   | 745  | 995   | 0 |
| 1693 | YER124C                 | C | DSE1   | 2383 | 6154  | 0 |
| 1694 | YER126C                 | C | NSA2   | 2380 | 3412  | 0 |
| 1695 | YER128W                 | W |        | 740  | 993   | 0 |
| 1696 | YER130C                 | C |        | 1279 | 2179  | 0 |
| 1697 | YER132C                 | C | PMD1   | 826  | 1141  | 0 |
| 1698 | YER134C                 | C |        | 487  | 592   | 0 |
| 1699 | YFL027C                 | C |        | 1232 | 1681  | 0 |
| 1700 | YFL029C                 | C | CAK1   | 627  | 735   | 1 |
| 1701 | YFL031W                 | W | HAC1   | 6792 | 6417  | 0 |
| 1702 | YFL033C                 | C | RIM15  | 535  | 615   | 1 |
| 1703 | YFL035C                 |   |        | 1379 | 1627  | 0 |
| 1704 | YFL037W                 | W | TUB2   | 7137 | 5801  | 0 |
| 1705 | YFR054C                 | C |        | 387  | 348   | 0 |
| 1706 | YFR056C                 | C |        | 893  | 953   | 0 |
| 1707 | YGL001C                 | C | ERG26  | 1717 | 2149  | 0 |
| 1708 | YGL003C                 | C | CDH1   | 1078 | 1025  | 0 |
| 1709 | YGL005C                 | C |        | 1048 | 1234  | 0 |
| 1710 | YGL007W                 | W |        | 457  | 383   | 0 |
| 1711 | YGL093W                 | W | SPC105 | 776  | 1016  | 0 |
| 1712 | YGL095C                 | C | VPS45  | 1366 | 1744  | 0 |
| 1713 | YGL097W                 | W | SRM1   | 2488 | 3149  | 0 |
| 1714 | YGL099W                 | W | KRE35  | 3396 | 4221  | 0 |
| 1715 | YGL101W                 | W |        | 1479 | 1309  | 0 |

|      |         |   |         |      |       |   |
|------|---------|---|---------|------|-------|---|
| 1716 | YGL103W | W | RPL28   | 4383 | 4636  | 0 |
| 1717 | YGL189C | C | RPS26A  | 9333 | 11003 | 0 |
| 1718 | YGL191W | W | COX13   | 1855 | 2082  | 0 |
| 1719 | YGL193C | C |         | 792  | 740   | 0 |
| 1720 | YGL195W | W | GCN1    | 703  | 794   | 1 |
| 1721 | YGL197W | W | MDS3    | 575  | 851   | 0 |
| 1722 | YGL199C | C |         | 1567 | 1697  | 0 |
| 1723 | YGR022C | C |         | 487  | 435   | 0 |
| 1724 | YGR024C | C |         | 1174 | 1333  | 0 |
| 1725 | YGR026W | W |         | 3767 | 4445  | 0 |
| 1726 | YGR028W | W | MSP1    | 1058 | 1413  | 0 |
| 1727 | YGR030C | C | POP6    | 938  | 1059  | 0 |
| 1728 | YGR032W | W | GSC2    | 475  | 541   | 0 |
| 1729 | YGR118W | W | RPS23A  | 5292 | 6524  | 0 |
| 1730 | YGR120C | C | SEC35   | 939  | 1138  | 0 |
| 1731 | YGR122W | W |         | 853  | 860   | 0 |
| 1732 | YGR124W | W | ASN2    | 7118 | 7367  | 0 |
| 1733 | YGR126W | W |         | 502  | 467   | 0 |
| 1734 | YGR128C | C |         | 1558 | 2539  | 0 |
| 1735 | YGR214W | W | RPS0A   | 9055 | 8696  | 0 |
| 1736 | YGR216C | C | GPI1    | 1256 | 1421  | 0 |
| 1737 | YGR218W | W | CRM1    | 1168 | 1544  | 0 |
| 1738 | YGR220C | C | MRPL9   | 908  | 1346  | 0 |
| 1739 | YGR222W | W | PET54   | 704  | 924   | 0 |
| 1740 | YGR224W | W | AZR1    | 569  | 514   | 0 |
| 1741 | YHL014C | C | YLF2    | 739  | 763   | 0 |
| 1742 | YHL016C | C | DUR3    | 479  | 411   | 0 |
| 1743 | YHL018W | W |         | 548  | 475   | 0 |
| 1744 | YHL020C | C | OPI1    | 1446 | 1743  | 0 |
| 1745 | YHL022C | C | SP011   | 271  | 238   | 0 |
| 1746 | YHL024W | W | RIM4    | 502  | 581   | 0 |
| 1747 | YHR059W | W | FYV4    | 622  | 802   | 0 |
| 1748 | YHR061C | C | GIC1    | 1061 | 948   | 0 |
| 1749 | YHR063C | C | PAN5    | 1709 | 2433  | 0 |
| 1750 | YHR065C | C | RRP3    | 1966 | 2811  | 0 |
| 1751 | YHR067W | W |         | 757  | 927   | 0 |
| 1752 | YHR069C | C | RRP4    | 1180 | 1601  | 0 |
| 1753 | YHR153C | C | SP016   | 571  | 585   | 0 |
| 1754 | YHR155W | W |         | 844  | 1206  | 0 |
| 1755 | YHR157W | W | REC104  | 432  | 407   | 0 |
| 1756 | YHR159W | W |         | 733  | 719   | 0 |
| 1757 | YHR161C | C | YAP1801 | 1193 | 1964  | 0 |
| 1758 | YHR163W | W | SOL3    | 1446 | 1769  | 0 |
| 1759 | YIL030C | C | SSM4    | 1072 | 1199  | 0 |
| 1760 | YIL032C | C |         | 398  | 385   | 0 |
| 1761 | YIL034C | C | CAP2    | 2538 | 3495  | 0 |
| 1762 | YIL036W | W | CST6    | 1161 | 1526  | 0 |
| 1763 | YIL038C | C | NOT3    | 1433 | 2095  | 0 |
| 1764 | YIL040W | W |         | 1134 | 1216  | 0 |
| 1765 | YIL127C | C |         | 1693 | 2537  | 0 |
| 1766 | YIL129C | C | TA03    | 335  | 278   | 1 |
| 1767 | YIL131C | C | FKH1    | 514  | 633   | 0 |

|                              |   |        |      |      |   |
|------------------------------|---|--------|------|------|---|
| 1768 YIL133C                 | C | RPL16A | 6122 | 5781 | 0 |
| 1769 YIL135C                 | C |        | 551  | 659  | 0 |
| 1770 YIL137C                 | C |        | 1057 | 1373 | 0 |
| 1771 YJL002C                 | C | OST1   | 2795 | 2967 | 0 |
| 1772 YJL004C                 | C | SYS1   | 1346 | 1349 | 0 |
| 1773 YJL006C                 | C | CTK2   | 866  | 984  | 0 |
| 1774 YJL008C                 | C | CCT8   | 4079 | 5443 | 0 |
| 1775 YJL010C                 | C |        | 493  | 662  | 1 |
| 1776 YJL012C                 | C | VTC4   | 353  | 373  | 0 |
| 1777 YJL099W                 | W | CHS6   | 430  | 518  | 2 |
| 1778 YJL101C                 | C | GSH1   | 1273 | 1291 | 0 |
| 1779 YJL103C                 | C |        | 479  | 481  | 0 |
| 1780 YJL105W                 | W | SET4   | 449  | 401  | 0 |
| 1781 YJL107C                 | C |        | 777  | 905  | 0 |
| 1782 YJL109C                 | C |        | 517  | 501  | 0 |
| 1783 YJL195C                 | C |        | 887  | 908  | 0 |
| 1784 YJL197W                 | W | UBP12  | 729  | 983  | 0 |
| 1785 YJL199C                 | C |        | 549  | 613  | 0 |
| 1786 YJL201W                 | W | ECM25  | 1359 | 1317 | 0 |
| 1787 YJL203W                 | W | PRP21  | 873  | 1136 | 0 |
| 1788 YJL206C                 | C |        | 616  | 718  | 0 |
| 1789 YJR066W                 | W | TOR1   | 490  | 738  | 1 |
| 1790 YJR068W                 | W | RFC2   | 1333 | 1857 | 0 |
| 1791 YJR070C                 | C |        | 3600 | 4306 | 0 |
| 1792 YJR072C                 | C |        | 1789 | 2841 | 0 |
| 1793 YJR074W                 | W | MOG1   | 1015 | 1601 | 0 |
| 1794 YJR076C                 | C | CDC11  | 1956 | 2513 | 0 |
| 1795 YKL001C                 | C | MET14  | 320  | 327  | 1 |
| 1796 YKL003C                 | C | MRP17  | 955  | 1256 | 0 |
| 1797 YKL005C                 | C |        | 1293 | 1545 | 0 |
| 1798 YKL006W                 | W | RPL14A | 6419 | 6582 | 0 |
| 1799 YKL008C                 | C | LAC1   | 2862 | 2861 | 0 |
| 1800 YKL010C                 | C | UFD4   | 902  | 1280 | 0 |
| 1801 YKL096W                 | W | CWP1   | 3987 | 9039 | 0 |
| 1802 YKL096W- <del>A</del> W | W | CWP2   | 6572 | 7500 | 0 |
| 1803 YKL099C                 | C |        | 1220 | 1768 | 0 |
| 1804 YKL101W                 | W | HSL1   | 552  | 750  | 0 |
| 1805 YKL103C                 | C | LAP4   | 1263 | 3869 | 0 |
| 1806 YKL105C                 | C |        | 539  | 634  | 0 |
| 1807 YKL191W                 | W | DPH2   | 2162 | 2177 | 0 |
| 1808 YKL193C                 | C | SDS22  | 3518 | 3383 | 0 |
| 1809 YKL195W                 | W |        | 267  | 215  | 1 |
| 1810 YKL197C                 | C | PEX1   | 1374 | 1757 | 2 |
| 1811 YKL199C                 | C | YKT9   | 1134 | 835  | 1 |
| 1812 YKL201C                 | C | MNN4   | 1456 | 2024 | 0 |
| 1813 YKR062W                 | W | TFA2   | 1500 | 2149 | 0 |
| 1814 YKR064W                 | W |        | 771  | 1003 | 0 |
| 1815 YKR066C                 | C | CCP1   | 2229 | 2405 | 0 |
| 1816 YKR068C                 | C | BET3   | 1279 | 1503 | 0 |
| 1817 YKR070W                 | W |        | 1304 | 1867 | 0 |
| 1818 YKR072C                 | C | SIS2   | 1583 | 2344 | 0 |
| 1819 YLL052C                 | C | AQY2   | 1556 | 1998 | 0 |

|      |         |   |        |      |      |   |
|------|---------|---|--------|------|------|---|
| 1820 | YLL054C | C |        | 782  | 711  | 0 |
| 1821 | YLL056C | C |        | 544  | 504  | 0 |
| 1822 | YLL058W | W |        | 1139 | 1249 | 0 |
| 1823 | YLL060C | C | GTT2   | 594  | 615  | 0 |
| 1824 | YLL062C | C | MHT1   | 2044 | 1735 | 0 |
| 1825 | YLR081W | W | GAL2   | 598  | 471  | 0 |
| 1826 | YLR083C | C | EMP70  | 2311 | 1996 | 0 |
| 1827 | YLR085C | C | ARP6   | 855  | 912  | 0 |
| 1828 | YLR087C | C | CSF1   | 324  | 314  | 1 |
| 1829 | YLR089C | C |        | 2094 | 2795 | 0 |
| 1830 | YLR091W | W |        | 745  | 771  | 0 |
| 1831 | YLR177W | W |        | 1471 | 1380 | 0 |
| 1832 | YLR179C | C |        | 2584 | 2691 | 0 |
| 1833 | YLR181C | C |        | 1862 | 1436 | 0 |
| 1834 | YLR183C | C | TOS4   | 1382 | 1557 | 0 |
| 1835 | YLR185W | W | RPL37A | 3758 | 4217 | 0 |
| 1836 | YLR187W | W |        | 1410 | 1522 | 0 |
| 1837 | YLR273C | C | PIG1   | 661  | 893  | 0 |
| 1838 | YLR275W | W | SMD2   | 662  | 795  | 0 |
| 1839 | YLR277C | C | YSH1   | 1081 | 1373 | 0 |
| 1840 | YLR279W | W |        | 396  | 364  | 0 |
| 1841 | YLR281C | C |        | 383  | 345  | 0 |
| 1842 | YLR283W | W |        | 886  | 992  | 0 |
| 1843 | YLR369W | W | SSQ1   | 836  | 1159 | 0 |
| 1844 | YLR371W | W | ROM2   | 1336 | 1821 | 0 |
| 1845 | YLR373C | C | VID22  | 1719 | 1760 | 2 |
| 1846 | YLR375W | W | STP3   | 1395 | 1843 | 0 |
| 1847 | YLR377C | C | FBP1   | 545  | 452  | 0 |
| 1848 | YLR379W | W |        | 3401 | 3113 | 0 |
| 1849 | YLR465C | C |        | 1606 | 1386 | 0 |
| 1850 | YLR467W | W | YRF1-5 | 1793 | 2299 | 0 |
| 1851 | YML002W | W |        | 336  | 365  | 0 |
| 1852 | YML004C | C | GL01   | 1903 | 5128 | 0 |
| 1853 | YML006C | C | GIS4   | 489  | 705  | 0 |
| 1854 | YML008C | C | ERG6   | 1638 | 3209 | 0 |
| 1855 | YML109W | W | ZDS2   | 822  | 992  | 0 |
| 1856 | YML111W | W | BUL2   | 575  | 774  | 2 |
| 1857 | YML113W | W | DAT1   | 1011 | 1589 | 0 |
| 1858 | YML115C | C | VAN1   | 2221 | 2639 | 0 |
| 1859 | YML117W | W |        | 1268 | 1770 | 0 |
| 1860 | YML119W | W |        | 991  | 1154 | 0 |
| 1861 | YMR081C | C | ISF1   | 487  | 427  | 0 |
| 1862 | YMR083W | W | ADH3   | 5915 | 7289 | 0 |
| 1863 | YMR087W | W |        | 1041 | 1042 | 0 |
| 1864 | YMR089C | C | YTA12  | 1487 | 2726 | 0 |
| 1865 | YMR091C | C | NPL6   | 2112 | 2523 | 0 |
| 1866 | YMR093W | W |        | 2319 | 2941 | 0 |
| 1867 | YMR188C | C |        | 972  | 1094 | 0 |
| 1868 | YMR190C | C | SGS1   | 392  | 424  | 1 |
| 1869 | YMR192W | W |        | 1196 | 1164 | 0 |
| 1870 | YMR195W | W | ICY1   | 891  | 866  | 0 |
| 1871 | YMR197C | C | VTI1   | 1184 | 1832 | 0 |

|      |         |   |        |       |       |   |
|------|---------|---|--------|-------|-------|---|
| 1872 | YMR199W | W | CLN1   | 811   | 1019  | 1 |
| 1873 | YMR295C | C |        | 2273  | 2437  | 0 |
| 1874 | YMR297W | W | PRC1   | 4819  | 9267  | 0 |
| 1875 | YMR299C | C |        | 828   | 965   | 0 |
| 1876 | YMR301C | C | ATM1   | 1263  | 1332  | 0 |
| 1877 | YMR303C | C | ADH2   | 7581  | 10503 | 0 |
| 1878 | YMR305C | C | SCW10  | 5684  | 4898  | 0 |
| 1879 | YNL066W | W | SUN4   | 4443  | 5279  | 0 |
| 1880 | YNL068C | C | FKH2   | 1274  | 1789  | 0 |
| 1881 | YNL070W | W | TOM7   | 1058  | 1305  | 0 |
| 1882 | YNL072W | W | RNH35  | 829   | 925   | 0 |
| 1883 | YNL074C | C | MLF3   | 1908  | 2109  | 0 |
| 1884 | YNL076W | W | MKS1   | 966   | 1312  | 0 |
| 1885 | YNL162W | W | RPL42A | 2653  | 3229  | 0 |
| 1886 | YNL164C | C |        | 773   | 1054  | 0 |
| 1887 | YNL166C | C | BNI5   | 1403  | 2014  | 0 |
| 1888 | YNL168C | C |        | 1476  | 1724  | 0 |
| 1889 | YNL170W | W |        | 1456  | 1180  | 0 |
| 1890 | YNL172W | W | APC1   | 373   | 364   | 1 |
| 1891 | YNL258C | C | DSL1   | 667   | 922   | 0 |
| 1892 | YNL260C | C |        | 975   | 1155  | 0 |
| 1893 | YNL262W | W | POL2   | 420   | 374   | 1 |
| 1894 | YNL264C | C | PDR17  | 1315  | 1555  | 0 |
| 1895 | YNL266W | W |        | 974   | 1216  | 0 |
| 1896 | YNL268W | W | LYP1   | 2393  | 2852  | 0 |
| 1897 | YNR015W | W | SMM1   | 974   | 1062  | 0 |
| 1898 | YNR017W | W | MAS6   | 1670  | 2109  | 0 |
| 1899 | YNR019W | W | ARE2   | 357   | 430   | 0 |
| 1900 | YNR021W | W |        | 286   | 276   | 1 |
| 1901 | YNR023W | W | SNF12  | 668   | 788   | 0 |
| 1902 | YNR025C | C |        | 803   | 1144  | 0 |
| 1903 | YOL034W | W |        | 644   | 883   | 0 |
| 1904 | YOL036W | W |        | 1757  | 2155  | 0 |
| 1905 | YOL038W | W | PRE6   | 2517  | 4127  | 0 |
| 1906 | YOL040C | C | RPS15  | 7378  | 8050  | 0 |
| 1907 | YOL042W | W | NGL1   | 808   | 780   | 0 |
| 1908 | YOL044W | W | PEX15  | 512   | 615   | 0 |
| 1909 | YOL129W | W |        | 1840  | 2461  | 0 |
| 1910 | YOL131W | W |        | 339   | 294   | 0 |
| 1911 | YOL133W | W | HRT1   | 875   | 1472  | 0 |
| 1912 | YOL135C | C | MED7   | 912   | 1060  | 0 |
| 1913 | YOL137W | W |        | 1213  | 1373  | 0 |
| 1914 | YOL139C | C | CDC33  | 3670  | 4660  | 0 |
| 1915 | YOR059C | C |        | 947   | 1028  | 0 |
| 1916 | YOR061W | W | CKA2   | 1067  | 1155  | 1 |
| 1917 | YOR063W | W | RPL3   | 14513 | 13333 | 0 |
| 1918 | YOR065W | W | CYT1   | 1985  | 1824  | 0 |
| 1919 | YOR067C | C | ALG8   | 1551  | 1606  | 0 |
| 1920 | YOR069W | W | VPS5   | 1189  | 1308  | 0 |
| 1921 | YOR155C | C |        | 547   | 798   | 0 |
| 1922 | YOR157C | C | PUP1   | 2728  | 4175  | 0 |
| 1923 | YOR159C | C | SME1   | 670   | 890   | 0 |

|      |         |   |       |      |      |   |
|------|---------|---|-------|------|------|---|
| 1924 | YOR161C | C |       | 2108 | 3032 | 0 |
| 1925 | YOR163W | W | DDP1  | 1504 | 2540 | 0 |
| 1926 | YOR165W | W |       | 2036 | 2254 | 0 |
| 1927 | YOR251C | C |       | 1098 | 1210 | 0 |
| 1928 | YOR253W | W |       | 1527 | 1890 | 0 |
| 1929 | YOR255W | W |       | 354  | 304  | 0 |
| 1930 | YOR257W | W | CDC31 | 725  | 1021 | 0 |
| 1931 | YOR259C | C | RPT4  | 2621 | 4578 | 0 |
| 1932 | YOR261C | C | RPN8  | 2337 | 3877 | 0 |
| 1933 | YOR347C | C | PYK2  | 819  | 1375 | 0 |
| 1934 | YOR349W | W | CIN1  | 259  | 218  | 1 |
| 1935 | YOR351C | C | MEK1  | 283  | 238  | 2 |
| 1936 | YOR353C | C |       | 310  | 308  | 0 |
| 1937 | YOR355W | W | GDS1  | 545  | 755  | 2 |
| 1938 | YOR357C | C | GRD19 | 868  | 1320 | 0 |
| 1939 | YPL049C | C | DIG1  | 1655 | 2205 | 0 |
| 1940 | YPL051W | W | ARL3  | 578  | 656  | 0 |
| 1941 | YPL053C | C | KTR6  | 1011 | 1446 | 0 |
| 1942 | YPL055C | C |       | 702  | 941  | 0 |
| 1943 | YPL057C | C | SUR1  | 751  | 680  | 0 |
| 1944 | YPL059W | W | GRX5  | 1111 | 1374 | 0 |
| 1945 | YPL145C | C | KES1  | 3394 | 3162 | 0 |
| 1946 | YPL147W | W | PXA1  | 402  | 379  | 0 |
| 1947 | YPL149W | W | APG5  | 659  | 871  | 0 |
| 1948 | YPL151C | C | PRP46 | 774  | 944  | 0 |
| 1949 | YPL153C | C | RAD53 | 245  | 208  | 1 |
| 1950 | YPL155C | C | KIP2  | 709  | 733  | 0 |
| 1951 | YPL241C | C | CIN2  | 849  | 875  | 0 |
| 1952 | YPL243W | W | SRP68 | 2066 | 2553 | 0 |
| 1953 | YPL245W | W |       | 1630 | 1434 | 0 |
| 1954 | YPL247C | C |       | 666  | 571  | 0 |
| 1955 | YPL249C | C |       | 262  | 228  | 1 |
| 1956 | YPL251W | W |       | 1087 | 1252 | 0 |
| 1957 | YPR054W | W | SMK1  | 710  | 695  | 0 |
| 1958 | YPR056W | W | TFB4  | 889  | 944  | 0 |
| 1959 | YPR058W | W | YMC1  | 1120 | 1037 | 0 |
| 1960 | YPR060C | C | ARO7  | 1611 | 2207 | 0 |
| 1961 | YPR062W | W | FCY1  | 2419 | 3147 | 0 |
| 1962 | YPR064W | W |       | 371  | 345  | 0 |
| 1963 | YPR150W | W |       | 359  | 344  | 0 |
| 1964 | YPR152C | C |       | 362  | 388  | 1 |
| 1965 | YPR154W | W | PIN3  | 936  | 1196 | 0 |
| 1966 | YPR156C | C |       | 2298 | 2811 | 0 |
| 1967 | YPR158W | W |       | 900  | 743  | 0 |
| 1968 | YPR160W | W | GPH1  | 347  | 267  | 1 |
| 1969 | NORF 4  |   |       | 2296 | 3588 | 0 |
| 1970 | NORF 8  |   |       | 247  | 201  | 1 |
| 1971 | NORF 12 |   |       | 1825 | 2953 | 0 |
| 1972 | NORF 16 |   |       | 2480 | 3291 | 0 |
| 1973 | NORF 20 |   |       | 312  | 296  | 0 |
| 1974 | NORF 24 |   |       | 594  | 674  | 0 |
| 1975 | YBL088C | C | TEL1  | 284  | 266  | 1 |

|      |                     |   |        |      |      |   |
|------|---------------------|---|--------|------|------|---|
| 1976 | YBR033W             | W |        | 444  | 479  | 0 |
| 1977 | YBR048W             | W | RPS11B | 4108 | 4534 | 0 |
| 1978 | YBR081C             | C | SPT7   | 512  | 738  | 2 |
| 1979 | YBR136W             | W | MEC1   | 296  | 299  | 1 |
| 1980 | YBR166C             | C | TYR1   | 1134 | 1632 | 0 |
| 1981 | YFL001W             | W | DEG1   | 1241 | 1581 | 0 |
| 1982 | YFL029C             | C | CAK1   | 804  | 1025 | 0 |
| 1983 | YFL057C             | C |        | 974  | 1037 | 0 |
| 1984 | YFR034C             | C | PHO4   | 573  | 590  | 0 |
| 1985 | YFR051C             | C | RET2   | 1884 | 2023 | 0 |
| 1986 | YGL034C             | C |        | 352  | 278  | 0 |
| 1987 | YLL048C             | C | YBT1   | 1067 | 1202 | 2 |
| 1988 | YLR031W             | W |        | 539  | 545  | 0 |
| 1989 | YLR087C             | C | CSF1   | 443  | 379  | 1 |
| 1990 | YLR134W             | W | PDC5   | 6500 | 4761 | 2 |
| 1991 | YLR177W             | W |        | 1376 | 1191 | 0 |
| 1992 | YLR235C             | C |        | 574  | 445  | 0 |
| 1993 | YPL147W             | W | PXA1   | 344  | 360  | 0 |
| 1994 | YPL153C             | C | RAD53  | 481  | 629  | 0 |
| 1995 | YPL161C             | C | BEM4   | 464  | 629  | 0 |
| 1996 | YPL181W             | W |        | 1042 | 1379 | 0 |
| 1997 | YPL215W             | W | CBP3   | 1083 | 1233 | 0 |
| 1998 | YPL226W             | W | NEW1   | 2674 | 2233 | 2 |
| 1999 | YMR117C             | C | SPC24  | 276  | 210  | 0 |
| 2000 | YML017W             | W | PSP2   | 249  | 191  | 0 |
| 2001 | YER066C- <i>A</i> C |   |        | 250  | 199  | 0 |
| 2002 | YAL058C- <i>A</i> C |   | KRE20  | 254  | 202  | 0 |
| 2003 | YEL076W- <i>C</i> W |   |        | 250  | 217  | 0 |
| 2004 | YHR001W- <i>A</i> W |   | QCR10  | 264  | 237  | 0 |
| 2005 | YER044C- <i>A</i> C |   | MEI4   | 389  | 380  | 0 |
| 2006 | YER087C- <i>A</i> C |   | SBH1   | 1925 | 1877 | 0 |
| 2007 | YFL017W- <i>A</i> W |   | SMX2   | 787  | 930  | 0 |
| 2008 | YHR001W- <i>A</i> W |   | QCR10  | 682  | 730  | 1 |
| 2009 | YKL006C- <i>A</i> C |   | SFT1   | 337  | 318  | 1 |
| 2010 | YLR337W             |   |        | 1567 | 2003 | 0 |
| 2011 | YDR227W             | W | SIR4   | 662  | 779  | 0 |
| 2012 | YDR343C             | C | HXT6   | 1645 | 1734 | 2 |
| 2013 | YEL006W             | W |        | 952  | 1050 | 0 |
| 2014 | YER011W             | W | TIR1   | 1199 | 1023 | 0 |
| 2015 | YER132C             | C | PMD1   | 445  | 433  | 0 |
| 2016 | YER166W             | W | DNF1   | 519  | 408  | 0 |
| 2017 | YCR018C             | C | SRD1   | 255  | 208  | 1 |
| 2018 | YGL141W             | W | HUL5   | 572  | 695  | 0 |
| 2019 | YHR099W             | W | TRA1   | 739  | 940  | 0 |
| 2020 | YJR042W             | W | NUP85  | 634  | 905  | 0 |
| 2021 | YLR106C             | C |        | 464  | 426  | 0 |
| 2022 | YML003W             | W |        | 352  | 327  | 0 |
| 2023 | YJR067C             | C | YAE1   | 604  | 845  | 1 |
| 2024 | YJR127C             | C | ZMS1   | 486  | 491  | 1 |
| 2025 | YKL086W             | W |        | 281  | 253  | 1 |
| 2026 | YKL094W             | W | YJU3   | 1211 | 1819 | 1 |
| 2027 | YKL165C             | C | MCD4   | 725  | 663  | 0 |

|      |               |   |       |      |      |   |
|------|---------------|---|-------|------|------|---|
| 2028 | YKL199C       | C | YKT9  | 487  | 515  | 0 |
| 2029 | YPL045W       | W | VPS16 | 789  | 981  | 0 |
| 2030 | YPL075W       | W | GCR1  | 923  | 1232 | 0 |
| 2031 | YPL102C       | C | KRE24 | 480  | 484  | 0 |
| 2032 | YPL144W       | W |       | 517  | 524  | 1 |
| 2033 | YPL210C       | C | SRP72 | 1909 | 2693 | 0 |
| 2034 | YPL262W       | W | FUM1  | 2690 | 3572 | 0 |
| 2035 | YDR040C       | C | ENA1  | 488  | 715  | 0 |
| 2036 | EMPTY         |   |       | 698  | 689  | 0 |
| 2037 | EMPTY         |   |       | 274  | 211  | 0 |
| 2038 | EMPTY         |   |       | 297  | 229  | 0 |
| 2039 | EMPTY         |   |       | 295  | 231  | 0 |
| 2040 | EMPTY         |   |       | 332  | 245  | 0 |
| 2041 | YAR015W       | W | ADE1  | 239  | 179  | 2 |
| 2042 | YAR044W       | W | OSH1  | 624  | 781  | 0 |
| 2043 | YBL033C       | C | RIB1  | 394  | 459  | 1 |
| 2044 | YBL063W       | W | KIP1  | 437  | 434  | 2 |
| 2045 | YBR071W       | W |       | 1069 | 1212 | 0 |
| 2046 | YBR086C       | C | IST2  | 2834 | 2710 | 0 |
| 2047 | EMPTY         |   |       | 252  | 182  | 0 |
| 2048 | EMPTY         |   |       | 247  | 190  | 0 |
| 2049 | EMPTY         |   |       | 251  | 185  | 0 |
| 2050 | EMPTY         |   |       | 238  | 188  | 0 |
| 2051 | EMPTY         |   |       | 242  | 181  | 0 |
| 2052 | EMPTY         |   |       | 238  | 173  | 0 |
| 2053 | EMPTY         |   |       | 238  | 182  | 0 |
| 2054 | EMPTY         |   |       | 245  | 180  | 0 |
| 2055 | EMPTY         |   |       | 243  | 180  | 0 |
| 2056 | EMPTY         |   |       | 251  | 195  | 0 |
| 2057 | EMPTY         |   |       | 246  | 192  | 0 |
| 2058 | EMPTY         |   |       | 250  | 188  | 0 |
| 2059 | EMPTY         |   |       | 264  | 189  | 0 |
| 2060 | EMPTY         |   |       | 254  | 195  | 0 |
| 2061 | EMPTY         |   |       | 278  | 204  | 0 |
| 2062 | EMPTY         |   |       | 277  | 203  | 0 |
| 2063 | EMPTY         |   |       | 278  | 209  | 0 |
| 2064 | EMPTY         |   |       | 307  | 219  | 0 |
| 2065 | GENOMIC 1X    |   |       | 248  | 177  | 0 |
| 2066 | 3XSSC         |   |       | 232  | 175  | 0 |
| 2067 | GENOMIC 0.5X  |   |       | 251  | 184  | 0 |
| 2068 | 3XSSC         |   |       | 245  | 180  | 0 |
| 2069 | GENOMIC 0.25X |   |       | 241  | 181  | 0 |
| 2070 | 3XSSC         |   |       | 245  | 182  | 0 |
| 2071 | EMPTY         |   |       | 243  | 183  | 0 |
| 2072 | EMPTY         |   |       | 239  | 192  | 0 |
| 2073 | EMPTY         |   |       | 244  | 187  | 0 |
| 2074 | EMPTY         |   |       | 250  | 187  | 0 |
| 2075 | EMPTY         |   |       | 249  | 183  | 0 |
| 2076 | EMPTY         |   |       | 241  | 182  | 0 |
| 2077 | EMPTY         |   |       | 242  | 184  | 0 |
| 2078 | EMPTY         |   |       | 246  | 181  | 0 |
| 2079 | EMPTY         |   |       | 254  | 192  | 0 |

|      |               |          |      |      |   |
|------|---------------|----------|------|------|---|
| 2080 | EMPTY         |          | 249  | 183  | 0 |
| 2081 | EMPTY         |          | 258  | 186  | 0 |
| 2082 | EMPTY         |          | 251  | 193  | 0 |
| 2083 | EMPTY         |          | 248  | 190  | 0 |
| 2084 | EMPTY         |          | 257  | 193  | 0 |
| 2085 | EMPTY         |          | 261  | 198  | 0 |
| 2086 | EMPTY         |          | 285  | 204  | 0 |
| 2087 | EMPTY         |          | 296  | 210  | 0 |
| 2088 | EMPTY         |          | 311  | 216  | 0 |
| 2089 | GENOMIC 1X    |          | 1425 | 2176 | 0 |
| 2090 | 3XSSC         |          | 258  | 211  | 0 |
| 2091 | GENOMIC 0.5X  |          | 651  | 871  | 0 |
| 2092 | 3XSSC         |          | 255  | 182  | 0 |
| 2093 | GENOMIC 0.25X |          | 463  | 582  | 0 |
| 2094 | 3XSSC         |          | 263  | 196  | 0 |
| 2095 | EMPTY         |          | 244  | 186  | 0 |
| 2096 | EMPTY         |          | 235  | 185  | 0 |
| 2097 | EMPTY         |          | 244  | 181  | 0 |
| 2098 | EMPTY         |          | 234  | 178  | 0 |
| 2099 | EMPTY         |          | 246  | 180  | 0 |
| 2100 | EMPTY         |          | 243  | 179  | 0 |
| 2101 | EMPTY         |          | 243  | 179  | 0 |
| 2102 | EMPTY         |          | 235  | 183  | 0 |
| 2103 | EMPTY         |          | 246  | 188  | 0 |
| 2104 | EMPTY         |          | 251  | 189  | 0 |
| 2105 | EMPTY         |          | 252  | 191  | 0 |
| 2106 | EMPTY         |          | 243  | 182  | 0 |
| 2107 | EMPTY         |          | 259  | 183  | 0 |
| 2108 | EMPTY         |          | 238  | 179  | 0 |
| 2109 | EMPTY         |          | 422  | 235  | 0 |
| 2110 | EMPTY         |          | 287  | 223  | 0 |
| 2111 | EMPTY         |          | 299  | 196  | 0 |
| 2112 | EMPTY         |          | 304  | 207  | 0 |
| 2113 | YBR183W       | W YPC1   | 1179 | 1168 | 0 |
| 2114 | YBR185C       | C MBA1   | 807  | 921  | 0 |
| 2115 | YBR187W       | W        | 2987 | 2811 | 0 |
| 2116 | YBR189W       | W RPS9B  | 4051 | 5101 | 0 |
| 2117 | YBR191W       | W RPL21A | 2535 | 3038 | 0 |
| 2118 | YBR193C       | C MED8   | 989  | 1157 | 0 |
| 2119 | YBR279W       | W PAF1   | 1562 | 2314 | 0 |
| 2120 | YBR281C       | C        | 957  | 1340 | 0 |
| 2121 | YBR283C       | C SSH1   | 4292 | 4550 | 0 |
| 2122 | YBR285W       | W        | 516  | 663  | 0 |
| 2123 | YBR287W       | W        | 1186 | 1605 | 0 |
| 2124 | YBR289W       | W SNF5   | 1009 | 1390 | 1 |
| 2125 | YCLX01W       |          | 932  | 1476 | 0 |
| 2126 | YCLX03C       |          | 436  | 373  | 0 |
| 2127 | YCLX05C       |          | 893  | 1170 | 0 |
| 2128 | YCLX07W       |          | 633  | 750  | 0 |
| 2129 | YCLX09W       |          | 756  | 661  | 0 |
| 2130 | YCLX11W       |          | 2603 | 2604 | 0 |
| 2131 | YCR083W       | W TRX3   | 678  | 870  | 0 |

|      |         |   |        |      |      |   |
|------|---------|---|--------|------|------|---|
| 2132 | YCR085W | W |        | 419  | 358  | 0 |
| 2133 | YCR087W | W |        | 1123 | 1410 | 0 |
| 2134 | YCR089W | W | FIG2   | 461  | 550  | 0 |
| 2135 | YCR091W | W | KIN82  | 707  | 668  | 0 |
| 2136 | YCR093W | W | CDC39  | 364  | 339  | 1 |
| 2137 | YDL050C | C |        | 1031 | 1731 | 0 |
| 2138 | YDL052C | C | SLC1   | 989  | 1420 | 0 |
| 2139 | YDL054C | C |        | 701  | 850  | 0 |
| 2140 | YDL056W | W | MBP1   | 454  | 583  | 0 |
| 2141 | YDL058W | W | US01   | 765  | 1209 | 1 |
| 2142 | YDL060W | W | TSR1   | 822  | 1513 | 0 |
| 2143 | YDL146W | W |        | 896  | 881  | 0 |
| 2144 | YDL148C | C | NOP14  | 1589 | 2324 | 0 |
| 2145 | YDL150W | W | RPC53  | 1318 | 2158 | 0 |
| 2146 | YDL152W | W |        | 872  | 1083 | 0 |
| 2147 | YDL154W | W | MSH5   | 484  | 489  | 0 |
| 2148 | YDL156W | W |        | 788  | 956  | 0 |
| 2149 | YDL242W | W |        | 380  | 358  | 0 |
| 2150 | YDL244W | W | THI13  | 567  | 568  | 0 |
| 2151 | YDL246C | C |        | 474  | 519  | 0 |
| 2152 | YDL248W | W | COS7   | 1583 | 2020 | 2 |
| 2153 | YDR002W | W | YRB1   | 2072 | 3324 | 0 |
| 2154 | YDR004W | W | RAD57  | 681  | 831  | 0 |
| 2155 | YDR090C | C |        | 766  | 694  | 0 |
| 2156 | YDR092W | W | UBC13  | 1175 | 1534 | 0 |
| 2157 | YDR094W | W |        | 1799 | 1804 | 0 |
| 2158 | YDR096W | W | GIS1   | 1258 | 1248 | 0 |
| 2159 | YDR098C | C | GRX3   | 1652 | 2379 | 0 |
| 2160 | YDR100W | W |        | 1556 | 2222 | 0 |
| 2161 | YDR186C | C |        | 982  | 1782 | 0 |
| 2162 | YDR188W | W | CCT6   | 2886 | 4087 | 0 |
| 2163 | YDR190C | C | RVB1   | 1776 | 2904 | 0 |
| 2164 | YDR192C | C | NUP42  | 787  | 1043 | 0 |
| 2165 | YDR194C | C | MSS116 | 1816 | 3072 | 0 |
| 2166 | YDR196C | C |        | 974  | 1230 | 0 |
| 2167 | YDR282C | C |        | 522  | 624  | 0 |
| 2168 | YDR284C | C | DPP1   | 1088 | 1196 | 0 |
| 2169 | YDR286C | C |        | 537  | 649  | 0 |
| 2170 | YDR288W | W |        | 685  | 843  | 0 |
| 2171 | YDR290W | W |        | 458  | 482  | 0 |
| 2172 | YDR292C | C | SRP101 | 1191 | 1637 | 0 |
| 2173 | YDR378C | C | LSM6   | 1354 | 1533 | 0 |
| 2174 | YDR380W | W | ARO10  | 1210 | 3594 | 0 |
| 2175 | YDR382W | W | RPP2B  | 7042 | 7318 | 0 |
| 2176 | YDR384C | C |        | 1285 | 1953 | 0 |
| 2177 | YDR386W | W | MUS81  | 678  | 831  | 0 |
| 2178 | YDR388W | W | RVS167 | 2415 | 4511 | 0 |
| 2179 | YDR474C | C |        | 724  | 963  | 0 |
| 2180 | YDR476C | C |        | 650  | 737  | 0 |
| 2181 | YDR478W | W | SNM1   | 616  | 881  | 0 |
| 2182 | YDR480W | W | DIG2   | 709  | 863  | 0 |
| 2183 | YDR482C | C |        | 690  | 997  | 0 |

|      |                         |   |       |       |       |   |
|------|-------------------------|---|-------|-------|-------|---|
| 2184 | YDR484W                 | W | SAC2  | 787   | 927   | 0 |
| 2185 | YAL026C                 | C | DRS2  | 708   | 986   | 0 |
| 2186 | YAL028AW                |   |       | 471   | 476   | 0 |
| 2187 | YAL029C                 | C | MY04  | 551   | 733   | 1 |
| 2188 | YAL031C                 | C | FUN21 | 519   | 705   | 0 |
| 2189 | YAL033W                 | W | POP5  | 341   | 351   | 1 |
| 2190 | YAL034C                 | C | FUN19 | 517   | 649   | 0 |
| 2191 | YBL015W                 | W | ACH1  | 894   | 924   | 0 |
| 2192 | YBL017C                 | C | PEP1  | 388   | 392   | 1 |
| 2193 | YBL019W                 | W | APN2  | 567   | 694   | 0 |
| 2194 | YBL021C                 | C | HAP3  | 620   | 710   | 0 |
| 2195 | YBL023C                 | C | MCM2  | 712   | 1014  | 0 |
| 2196 | YBL025W                 | W | RRN10 | 569   | 647   | 0 |
| 2197 | YBL109W                 | W |       | 1046  | 846   | 0 |
| 2198 | YBL111C                 | C |       | 3453  | 3795  | 0 |
| 2199 | YBL113C                 | C |       | 3806  | 5611  | 0 |
| 2200 | YBR002C                 | C | RER2  | 1017  | 1297  | 0 |
| 2201 | YBR004C                 | C |       | 726   | 919   | 0 |
| 2202 | YBR006W                 | W | UGA2  | 717   | 1045  | 0 |
| 2203 | YBR089W                 | W |       | 1515  | 2076  | 0 |
| 2204 | YBR089C- <del>A</del> C |   | NHP6B | 811   | 956   | 0 |
| 2205 | YBR092C                 | C | PHO3  | 1738  | 1931  | 0 |
| 2206 | YBR094W                 | W |       | 629   | 839   | 0 |
| 2207 | YBR096W                 | W |       | 1431  | 1995  | 0 |
| 2208 | YBR098W                 | W | MMS4  | 310   | 304   | 2 |
| 2209 | YEL024W                 | W | RIP1  | 1371  | 1428  | 0 |
| 2210 | YEL026W                 | W | SNU13 | 3662  | 4003  | 0 |
| 2211 | YEL028W                 | W |       | 597   | 666   | 0 |
| 2212 | YEL030W                 | W | ECM10 | 940   | 1367  | 0 |
| 2213 | YEL032W                 | W | MCM3  | 658   | 901   | 1 |
| 2214 | YEL034W                 | W | HYP2  | 5329  | 7339  | 0 |
| 2215 | YER042W                 | W | MXR1  | 955   | 1224  | 0 |
| 2216 | YER0441C                |   |       | 382   | 375   | 0 |
| 2217 | YER045C                 | C | ACA1  | 637   | 852   | 0 |
| 2218 | YER047C                 | C | SAP1  | 571   | 731   | 0 |
| 2219 | YER049W                 | W |       | 2065  | 2866  | 0 |
| 2220 | YER051W                 | W |       | 601   | 743   | 0 |
| 2221 | YER135C                 | C |       | 432   | 442   | 0 |
| 2222 | YER137C                 | C |       | 388   | 382   | 1 |
| 2223 | YER139C                 | C |       | 616   | 748   | 0 |
| 2224 | YER141W                 | W | COX15 | 1725  | 1971  | 0 |
| 2225 | YER143W                 | W | DDI1  | 881   | 1196  | 0 |
| 2226 | YER145C                 | C | FTR1  | 2182  | 3094  | 0 |
| 2227 | YFL038C                 | C | YPT1  | 1849  | 3348  | 0 |
| 2228 | YFL040W                 | W |       | 603   | 566   | 0 |
| 2229 | YFL042C                 | C |       | 690   | 809   | 0 |
| 2230 | YFL044C                 | C |       | 772   | 1140  | 0 |
| 2231 | YFL046W                 | W |       | 790   | 1004  | 0 |
| 2232 | YFL048C                 | C | EMP47 | 1715  | 2586  | 0 |
| 2233 | YGL008C                 | C | PMA1  | 10745 | 10397 | 0 |
| 2234 | YGL010W                 | W |       | 716   | 711   | 0 |
| 2235 | YGL012W                 | W | ERG4  | 2933  | 3223  | 0 |

|      |         |   |        |       |       |   |
|------|---------|---|--------|-------|-------|---|
| 2236 | YGL014W | W | PUF4   | 1577  | 1636  | 0 |
| 2237 | YGL016W | W | KAP122 | 1329  | 1318  | 0 |
| 2238 | YGL018C | C | JAC1   | 717   | 1005  | 0 |
| 2239 | YGL104C | C |        | 715   | 848   | 0 |
| 2240 | YGL106W | W | MLC1   | 1838  | 2901  | 0 |
| 2241 | YGL108C | C |        | 713   | 996   | 0 |
| 2242 | YGL110C | C |        | 828   | 1168  | 0 |
| 2243 | YGL112C | C | TAF60  | 1248  | 1678  | 0 |
| 2244 | YGL114W | W |        | 959   | 1096  | 0 |
| 2245 | YGL200C | C | EMP24  | 2208  | 2527  | 0 |
| 2246 | YGL202W | W | AR08   | 3314  | 3727  | 0 |
| 2247 | YGL204C | C |        | 551   | 620   | 0 |
| 2248 | YGL206C | C | CHC1   | 321   | 299   | 1 |
| 2249 | YGL208W | W | SIP2   | 617   | 782   | 0 |
| 2250 | YGL210W | W | YPT32  | 955   | 1194  | 0 |
| 2251 | YGR033C | C |        | 1533  | 1759  | 0 |
| 2252 | YGR035C | C |        | 489   | 418   | 0 |
| 2253 | YGR037C | C | ACB1   | 2104  | 2634  | 0 |
| 2254 | YGR039W | W |        | 417   | 441   | 0 |
| 2255 | YGR041W | W | BUD9   | 1118  | 1339  | 0 |
| 2256 | YGR043C | C |        | 658   | 4198  | 0 |
| 2257 | YGR129W | W | SYF2   | 754   | 1037  | 0 |
| 2258 | YGR131W | W |        | 476   | 438   | 0 |
| 2259 | YGR133W | W | PEX4   | 577   | 640   | 0 |
| 2260 | YGR135W | W | PRE9   | 1747  | 3039  | 0 |
| 2261 | YGR137W | W |        | 1024  | 1943  | 0 |
| 2262 | YGR139W | W |        | 472   | 566   | 0 |
| 2263 | YGR225W | W | AMA1   | 386   | 358   | 0 |
| 2264 | YGR227W | W | DIE2   | 670   | 850   | 0 |
| 2265 | YGR229C | C | SMI1   | 1607  | 2832  | 0 |
| 2266 | YGR231C | C | PHB2   | 908   | 1868  | 0 |
| 2267 | YGR233C | C | PH081  | 425   | 661   | 0 |
| 2268 | YGR235C | C |        | 1138  | 1080  | 0 |
| 2269 | YHL025W | W | SNF6   | 691   | 940   | 0 |
| 2270 | YHL027W | W | RIM101 | 765   | 1066  | 0 |
| 2271 | YHL029C | C |        | 939   | 1043  | 0 |
| 2272 | YHL031C | C | GOS1   | 821   | 948   | 0 |
| 2273 | YHL033C | C | RPL8A  | 10047 | 10827 | 0 |
| 2274 | YHL035C | C |        | 376   | 428   | 0 |
| 2275 | YHR070W | W | TRM5   | 1190  | 1628  | 0 |
| 2276 | YHR072W | W | ERG7   | 1082  | 1324  | 0 |
| 2277 | YHR074W | W | QNS1   | 1329  | 1554  | 0 |
| 2278 | YHR076W | W |        | 478   | 648   | 3 |
| 2279 | YHR078W | W |        | 303   | 291   | 1 |
| 2280 | YHR079C | C | IRE1   | 717   | 836   | 0 |
| 2281 | YHR164C | C | DNA2   | 313   | 303   | 1 |
| 2282 | YHR166C | C | CDC23  | 750   | 816   | 0 |
| 2283 | YHR168W | W |        | 702   | 764   | 0 |
| 2284 | YHR170W | W | NMD3   | 1654  | 2150  | 0 |
| 2285 | YHR172W | W | SPC97  | 495   | 552   | 1 |
| 2286 | YHR174W | W | ENO2   | 6648  | 8721  | 0 |
| 2287 | YIL041W | W |        | 782   | 1260  | 0 |

|      |                         |   |        |      |      |   |
|------|-------------------------|---|--------|------|------|---|
| 2288 | YIL043C                 | C | CBR1   | 2403 | 2675 | 0 |
| 2289 | YIL045W                 | W | PIG2   | 565  | 594  | 0 |
| 2290 | YIL047C                 | C | SYG1   | 1470 | 2032 | 0 |
| 2291 | YIL049W                 | W | DFG10  | 620  | 649  | 0 |
| 2292 | YIL051C                 | C | MMF1   | 3130 | 5194 | 0 |
| 2293 | YIL138C                 | C | TPM2   | 1285 | 2214 | 0 |
| 2294 | YIL140W                 | W | AXL2   | 1620 | 2011 | 0 |
| 2295 | YIL142W                 | W | CCT2   | 1941 | 3155 | 0 |
| 2296 | YIL144W                 | W | TID3   | 743  | 902  | 0 |
| 2297 | YIL146C                 | C | ECM37  | 821  | 796  | 0 |
| 2298 | YIL148W                 | W | RPL40A | 2646 | 3124 | 0 |
| 2299 | YJL013C                 | C | MAD3   | 604  | 691  | 0 |
| 2300 | YJL015C                 | C |        | 565  | 650  | 0 |
| 2301 | YJL017W                 | W |        | 802  | 1021 | 0 |
| 2302 | YJL019W                 | W |        | 588  | 662  | 0 |
| 2303 | YJL021C                 | C |        | 1620 | 2766 | 0 |
| 2304 | YJL023C                 | C | PET130 | 517  | 606  | 0 |
| 2305 | YJL110C                 | C | GZF3   | 631  | 933  | 0 |
| 2306 | YJL112W                 | W | MDV1   | 602  | 997  | 0 |
| 2307 | YJL114W                 | W |        | 551  | 674  | 0 |
| 2308 | YJL116C                 | C | NCA3   | 537  | 1220 | 0 |
| 2309 | YJL118W                 | W |        | 320  | 301  | 1 |
| 2310 | YJL120W                 | W |        | 324  | 313  | 1 |
| 2311 | YJL205C- <sup>A</sup> C |   | NCE101 | 482  | 648  | 1 |
| 2312 | YJL208C                 | C | NUC1   | 886  | 1282 | 0 |
| 2313 | YJL210W                 | W | PEX2   | 732  | 857  | 0 |
| 2314 | YJL212C                 | C | OPT1   | 1095 | 1002 | 0 |
| 2315 | YJL214W                 | W | HXT8   | 470  | 448  | 0 |
| 2316 | YJL216C                 | C |        | 458  | 447  | 0 |
| 2317 | YJR077C                 | C | MIR1   | 3314 | 3319 | 0 |
| 2318 | YJR079W                 | W |        | 680  | 959  | 0 |
| 2319 | YJR082C                 | C |        | 567  | 797  | 0 |
| 2320 | YJR084W                 | W |        | 635  | 780  | 0 |
| 2321 | YJR086W                 | W | STE18  | 1206 | 1979 | 0 |
| 2322 | YJR088C                 | C |        | 1176 | 1938 | 0 |
| 2323 | YKL011C                 | C | CCE1   | 719  | 761  | 0 |
| 2324 | YKL013C                 | C | ARC19  | 1149 | 1504 | 0 |
| 2325 | YKL015W                 | W | PUT3   | 553  | 624  | 0 |
| 2326 | YKL017C                 | C | HCS1   | 555  | 624  | 0 |
| 2327 | YKL019W                 | W | RAM2   | 1136 | 1309 | 0 |
| 2328 | YKL021C                 | C | MAK11  | 1201 | 1513 | 0 |
| 2329 | YKL106W                 | W | AAT1   | 1191 | 1595 | 0 |
| 2330 | YKL108W                 | W | SLD2   | 702  | 962  | 0 |
| 2331 | YKL110C                 | C | KTI12  | 872  | 1271 | 0 |
| 2332 | YKL112W                 | W | ABF1   | 1055 | 1731 | 0 |
| 2333 | YKL114C                 | C | APN1   | 1075 | 1650 | 0 |
| 2334 | YKL116C                 | C | PRR1   | 1667 | 1334 | 0 |
| 2335 | YKL202W                 | W |        | 1044 | 2008 | 0 |
| 2336 | YKL204W                 | W | EAP1   | 972  | 1489 | 0 |
| 2337 | YKL206C                 | C |        | 952  | 1146 | 0 |
| 2338 | YKL208W                 | W | CBT1   | 546  | 649  | 0 |
| 2339 | YKL210W                 | W | UBA1   | 2321 | 3865 | 0 |

|      |         |   |        |      |      |   |
|------|---------|---|--------|------|------|---|
| 2340 | YKL212W | W | SAC1   | 1135 | 1740 | 0 |
| 2341 | YKR073C | C |        | 364  | 360  | 0 |
| 2342 | YKR075C | C |        | 518  | 470  | 0 |
| 2343 | YKR077W | W |        | 881  | 1114 | 0 |
| 2344 | YKR079C | C |        | 859  | 1132 | 0 |
| 2345 | YKR081C | C | RPF2   | 1568 | 2370 | 0 |
| 2346 | YKR083C | C | DAD2   | 579  | 724  | 0 |
| 2347 | YLL063C | C | AYT1   | 495  | 484  | 0 |
| 2348 | YLL065W | W | GIN11  | 620  | 554  | 0 |
| 2349 | YLL067C | C |        | 3180 | 3819 | 0 |
| 2350 | YLR002C | C | NOC3   | 1279 | 1842 | 0 |
| 2351 | YLR004C | C |        | 454  | 487  | 0 |
| 2352 | YLR006C | C | SSK1   | 685  | 779  | 0 |
| 2353 | YLR092W | W | SUL2   | 377  | 398  | 0 |
| 2354 | YLR094C | C | GIS3   | 863  | 1201 | 0 |
| 2355 | YLR096W | W | KIN2   | 628  | 905  | 0 |
| 2356 | YLR098C | C | CHA4   | 561  | 637  | 0 |
| 2357 | YLR100W | W | ERG27  | 1188 | 1683 | 0 |
| 2358 | YLR102C | C | APC9   | 603  | 650  | 0 |
| 2359 | YLR188W | W | MDL1   | 1481 | 1815 | 0 |
| 2360 | YLR190W | W |        | 1860 | 2094 | 0 |
| 2361 | YLR192C | C | HCR1   | 2243 | 4001 | 0 |
| 2362 | YLR194C | C |        | 814  | 1372 | 0 |
| 2363 | YLR196W | W | PWP1   | 1901 | 3054 | 0 |
| 2364 | YLR198C | C |        | 5274 | 6932 | 0 |
| 2365 | YLR284C | C | ECI1   | 479  | 586  | 0 |
| 2366 | YLR286C | C | CTS1   | 4651 | 8305 | 0 |
| 2367 | YLR288C | C | MEC3   | 496  | 604  | 0 |
| 2368 | YLR290C | C |        | 831  | 1083 | 0 |
| 2369 | YLR292C | C | SEC72  | 1203 | 1765 | 0 |
| 2370 | YLR294C | C |        | 1125 | 1346 | 0 |
| 2371 | YLR380W | W | CSR1   | 1489 | 1642 | 0 |
| 2372 | YLR382C | C | NAM2   | 638  | 728  | 0 |
| 2373 | YLR384C | C | IKI3   | 475  | 490  | 1 |
| 2374 | YLR386W | W |        | 687  | 836  | 0 |
| 2375 | YLR388W | W | RPS29A | 2772 | 3265 | 0 |
| 2376 | YLR390W | W | ECM19  | 510  | 638  | 0 |
| 2377 | YML010W | W | SPT5   | 611  | 873  | 0 |
| 2378 | YML012W | W | ERV25  | 1954 | 2661 | 0 |
| 2379 | YML014W | W |        | 736  | 1044 | 0 |
| 2380 | YML016C | C | PPZ1   | 369  | 391  | 1 |
| 2381 | YML019W | W | OST6   | 1061 | 1113 | 0 |
| 2382 | YML021W |   |        | 777  | 1071 | 0 |
| 2383 | YML120C | C | NDI1   | 880  | 913  | 0 |
| 2384 | YML122C | C |        | 428  | 401  | 0 |
| 2385 | YML125C | C |        | 1528 | 1959 | 0 |
| 2386 | YML127W | W | RSC9   | 1093 | 1260 | 0 |
| 2387 | YML129C | C | COX14  | 519  | 692  | 0 |
| 2388 | YML131W | W |        | 1096 | 876  | 0 |
| 2389 | YMR094W | W | CTF13  | 541  | 592  | 0 |
| 2390 | YMR096W | W | SNZ1   | 612  | 752  | 0 |
| 2391 | YMR098C | C |        | 700  | 1035 | 0 |

|      |         |   |       |      |      |   |
|------|---------|---|-------|------|------|---|
| 2392 | YMR100W | W | MUB1  | 846  | 1043 | 0 |
| 2393 | YMR102C | C |       | 321  | 329  | 1 |
| 2394 | YMR104C | C | YPK2  | 472  | 470  | 0 |
| 2395 | YMR200W | W | ROT1  | 1231 | 1633 | 0 |
| 2396 | YMR203W | W | TOM40 | 3038 | 3651 | 0 |
| 2397 | YMR205C | C | PFK2  | 3931 | 4282 | 0 |
| 2398 | YMR207C | C | HFA1  | 417  | 378  | 1 |
| 2399 | YMR209C | C |       | 904  | 979  | 0 |
| 2400 | YMR211W | W |       | 606  | 698  | 0 |
| 2401 | YMR306W | W | FKS3  | 640  | 929  | 0 |
| 2402 | YMR308C | C | PSE1  | 1824 | 2401 | 0 |
| 2403 | YMR310C | C |       | 1260 | 1575 | 0 |
| 2404 | YMR312W | W | ELP6  | 1042 | 1123 | 0 |
| 2405 | YMR314W | W | PRE5  | 1935 | 2980 | 0 |
| 2406 | YMR316W | W | DIA1  | 599  | 671  | 0 |
| 2407 | YNL077W | W |       | 457  | 501  | 1 |
| 2408 | YNL079C | C | TPM1  | 2278 | 4442 | 0 |
| 2409 | YNL081C | C |       | 915  | 1186 | 0 |
| 2410 | YNL083W | W |       | 460  | 437  | 0 |
| 2411 | YNL085W | W | MKT1  | 2127 | 2482 | 0 |
| 2412 | YNL087W | W |       | 1913 | 1592 | 0 |
| 2413 | YNL173C | C | MDG1  | 902  | 1317 | 0 |
| 2414 | YNL175C | C | NOP13 | 1986 | 2450 | 0 |
| 2415 | YNL177C | C |       | 1109 | 1544 | 0 |
| 2416 | YNL179C | C |       | 518  | 756  | 0 |
| 2417 | YNL181W | W |       | 798  | 1182 | 0 |
| 2418 | YNL183C | C | NPR1  | 1235 | 1283 | 0 |
| 2419 | YNL269W | W |       | 493  | 498  | 0 |
| 2420 | YNL271C | C | BNI1  | 753  | 963  | 1 |
| 2421 | YNL273W | W | TOF1  | 749  | 962  | 0 |
| 2422 | YNL275W | W |       | 727  | 807  | 0 |
| 2423 | YNL277W | W | MET2  | 576  | 692  | 0 |
| 2424 | YNL279W | W | PRM1  | 923  | 1457 | 0 |
| 2425 | YNR026C | C | SEC12 | 978  | 1333 | 0 |
| 2426 | YNR028W | W | CPR8  | 1265 | 1280 | 0 |
| 2427 | YNR030W | W | ECM39 | 1485 | 1991 | 0 |
| 2428 | YNR032W | W | PPG1  | 672  | 789  | 0 |
| 2429 | YNR034W | W | SOL1  | 639  | 648  | 0 |
| 2430 | YNR036C | C |       | 1481 | 2162 | 0 |
| 2431 | YOL045W | W |       | 931  | 1364 | 0 |
| 2432 | YOL047C | C |       | 402  | 444  | 0 |
| 2433 | YOL049W | W | GSH2  | 1963 | 2856 | 0 |
| 2434 | YOL051W | W | GAL11 | 575  | 777  | 1 |
| 2435 | YOL053C |   |       | 603  | 1076 | 0 |
| 2436 | YOL054W | W |       | 615  | 660  | 0 |
| 2437 | YOL140W | W | ARG8  | 863  | 1019 | 0 |
| 2438 | YOL142W | W | RRP40 | 1226 | 1247 | 0 |
| 2439 | YOL144W | W | NOP8  | 1224 | 1468 | 0 |
| 2440 | YOL146W | W |       | 745  | 776  | 0 |
| 2441 | YOL148C | C | SPT20 | 882  | 1133 | 0 |
| 2442 | YOL150C | C |       | 1310 | 1107 | 0 |
| 2443 | YOR070C | C | GYP1  | 879  | 1011 | 0 |

|      |         |   |       |      |      |   |
|------|---------|---|-------|------|------|---|
| 2444 | YOR072W | W |       | 1318 | 1817 | 0 |
| 2445 | YOR074C | C | CDC21 | 961  | 1298 | 0 |
| 2446 | YOR076C | C | SKI7  | 911  | 1246 | 0 |
| 2447 | YOR078W | W | BUD21 | 1214 | 2151 | 0 |
| 2448 | YOR080W | W | DIA2  | 663  | 783  | 0 |
| 2449 | YOR166C | C |       | 661  | 893  | 0 |
| 2450 | YOR168W | W | GLN4  | 2021 | 3093 | 0 |
| 2451 | YOR170W | W |       | 640  | 853  | 0 |
| 2452 | YOR172W | W |       | 373  | 421  | 1 |
| 2453 | YOR174W | W | MED4  | 426  | 545  | 0 |
| 2454 | YOR176W | W | HEM15 | 1954 | 2281 | 0 |
| 2455 | YOR262W | W |       | 988  | 1267 | 0 |
| 2456 | YOR264W | W | DSE3  | 1088 | 1887 | 0 |
| 2457 | YOR266W | W | PNT1  | 504  | 643  | 0 |
| 2458 | YOR268C | C |       | 358  | 360  | 0 |
| 2459 | YOR270C | C | VPH1  | 2152 | 2670 | 0 |
| 2460 | YOR272W | W | YTM1  | 1389 | 2007 | 0 |
| 2461 | YOR358W | W | HAP5  | 489  | 545  | 0 |
| 2462 | YOR360C | C | PDE2  | 596  | 812  | 2 |
| 2463 | YOR362C | C | PRE10 | 1483 | 2536 | 0 |
| 2464 | YOR364W | W |       | 414  | 380  | 0 |
| 2465 | YOR366W | W |       | 384  | 348  | 0 |
| 2466 | YOR368W | W | RAD17 | 442  | 470  | 0 |
| 2467 | YPL060W | W | LPE10 | 481  | 461  | 0 |
| 2468 | YPL062W | W |       | 344  | 301  | 0 |
| 2469 | YPL064C | C |       | 693  | 1018 | 0 |
| 2470 | YPL066W | W |       | 831  | 1141 | 0 |
| 2471 | YPL068C | C |       | 715  | 997  | 0 |
| 2472 | YPL070W | W |       | 566  | 721  | 0 |
| 2473 | YPL156C | C | PRM4  | 989  | 1372 | 0 |
| 2474 | YPL158C | C |       | 993  | 1825 | 0 |
| 2475 | YPL160W | W | CDC60 | 1558 | 1956 | 0 |
| 2476 | YPL162C | C |       | 744  | 807  | 0 |
| 2477 | YPL164C | C | MLH3  | 523  | 601  | 0 |
| 2478 | YPL166W | W |       | 565  | 586  | 0 |
| 2479 | YPL252C | C | YAH1  | 1274 | 1586 | 0 |
| 2480 | YPL254W | W | HFI1  | 965  | 1295 | 0 |
| 2481 | YPL256C | C | CLN2  | 1912 | 2708 | 0 |
| 2482 | YPL258C | C | THI21 | 871  | 1095 | 0 |
| 2483 | YPL260W | W |       | 1517 | 2165 | 0 |
| 2484 | YPL262W | W | FUM1  | 1771 | 2515 | 0 |
| 2485 | YPR065W | W | ROX1  | 372  | 349  | 1 |
| 2486 | YPR067W | W | ISA2  | 810  | 1032 | 0 |
| 2487 | YPR069C | C | SPE3  | 368  | 388  | 1 |
| 2488 | YPR071W | W |       | 284  | 249  | 1 |
| 2489 | YPR073C | C | LTP1  | 1003 | 1540 | 0 |
| 2490 | YPR075C | C | OPY2  | 1038 | 1241 | 0 |
| 2491 | YPR161C | C | SGV1  | 1004 | 1466 | 0 |
| 2492 | YPR163C | C | TIF3  | 4801 | 5013 | 0 |
| 2493 | YPR165W | W | RH01  | 1411 | 1779 | 0 |
| 2494 | YPR167C | C | MET16 | 501  | 536  | 0 |
| 2495 | YPR169W | W |       | 1540 | 2059 | 0 |

|      |                   |   |        |      |      |   |
|------|-------------------|---|--------|------|------|---|
| 2496 | YPR171W           | W |        | 976  | 1220 | 0 |
| 2497 | NORF 25           |   |        | 956  | 1331 | 0 |
| 2498 | NORF 29           |   |        | 549  | 533  | 0 |
| 2499 | NORF 33           |   |        | 1744 | 2068 | 0 |
| 2500 | NORF 37           |   |        | 515  | 498  | 0 |
| 2501 | NORF 41           |   |        | 500  | 568  | 0 |
| 2502 | NORF 45           |   |        | 2398 | 2404 | 0 |
| 2503 | YBR199W           | W | KTR4   | 1581 | 2258 | 0 |
| 2504 | YBR218C           | C | PYC2   | 1294 | 1891 | 0 |
| 2505 | YBR245C           | C | ISW1   | 617  | 906  | 0 |
| 2506 | YCL027W           | W | FUS1   | 862  | 1443 | 0 |
| 2507 | YCL031C           | C | RRP7   | 1329 | 1836 | 0 |
| 2508 | YCL048W           | W |        | 454  | 411  | 0 |
| 2509 | YGL036W           | W | MTC2   | 984  | 1233 | 2 |
| 2510 | YGL092W           | W | NUP145 | 734  | 924  | 0 |
| 2511 | YGL195W           | W | GCN1   | 1215 | 990  | 2 |
| 2512 | YGL233W           | W | SEC15  | 762  | 903  | 0 |
| 2513 | YGR060W           | W | ERG25  | 483  | 536  | 0 |
| 2514 | YGR116W           | W | SPT6   | 320  | 315  | 1 |
| 2515 | YLR256W           | W | HAP1   | 2609 | 3515 | 0 |
| 2516 | YLR280C           | C |        | 318  | 259  | 0 |
| 2517 | YLR381W           | W |        | 471  | 436  | 0 |
| 2518 | YLR450W           | W | HMG2   | 625  | 549  | 0 |
| 2519 | YLR454W           | W |        | 311  | 316  | 1 |
| 2520 | YML016C           | C | PPZ1   | 965  | 1114 | 0 |
| 2521 | YPL231W           | W | FAS2   | 2416 | 2876 | 1 |
| 2522 | YPL242C           | C | IQG1   | 503  | 642  | 1 |
| 2523 | YPL249C           | C |        | 658  | 1066 | 2 |
| 2524 | YPR016C           | C | TIF6   | 2134 | 2054 | 0 |
| 2525 | YPR049C           | C | CVT9   | 362  | 328  | 0 |
| 2526 | YPR068C           | C | HOS1   | 448  | 487  | 0 |
| 2527 | YHR139C- <i>A</i> | C |        | 487  | 568  | 0 |
| 2528 | YER093C- <i>A</i> | C |        | 517  | 599  | 0 |
| 2529 | YDR235W           | W | PRP42  | 546  | 640  | 0 |
| 2530 | YDR237W           | W | MRPL7  | 834  | 1057 | 0 |
| 2531 | YDR239C           | C |        | 709  | 820  | 0 |
| 2532 | YDR179W- <i>A</i> | W |        | 523  | 579  | 0 |
| 2533 | YML009C           | C | MRPL39 | 630  | 787  | 0 |
| 2534 | YML021C           | C | UNG1   | 918  | 1102 | 0 |
| 2535 | YML073C           | C | RPL6A  | 3694 | 4311 | 0 |
| 2536 | YML086C           | C | AL01   | 1526 | 1785 | 0 |
| 2537 | YML124C           | C | TUB3   | 1696 | 2107 | 0 |
| 2538 | YMR060C           | C | TOM37  | 687  | 820  | 0 |
| 2539 | YFL019C           | C |        | 319  | 310  | 0 |
| 2540 | YGL006W           | W | PMC1   | 246  | 216  | 0 |
| 2541 | YGL066W           | W | SGF73  | 597  | 772  | 2 |
| 2542 | YGL209W           | W | MIG2   | 740  | 630  | 2 |
| 2543 | YGL257C           | C | MNT2   | 631  | 783  | 0 |
| 2544 | YGR061C           | C | ADE6   | 713  | 666  | 0 |
| 2545 | YML013C- <i>A</i> | C |        | 617  | 877  | 0 |
| 2546 | YML025C           | C |        | 766  | 1080 | 0 |
| 2547 | YML032C- <i>A</i> |   |        | 781  | 955  | 0 |

|      |                       |   |        |      |       |   |
|------|-----------------------|---|--------|------|-------|---|
| 2548 | YML039W               | W |        | 7402 | 12234 | 2 |
| 2549 | YML056C               | C | IMD4   | 1037 | 987   | 0 |
| 2550 | YML095C- <del>A</del> | C |        | 522  | 673   | 0 |
| 2551 | YKR010C               | C | TOF2   | 679  | 780   | 3 |
| 2552 | YKR040C               | C |        | 446  | 470   | 0 |
| 2553 | YKR086W               | W | PRP16  | 902  | 1033  | 1 |
| 2554 | YLL007C               | C |        | 670  | 601   | 0 |
| 2555 | YLL016W               | W | SDC25  | 1090 | 1533  | 1 |
| 2556 | YLL025W               | W |        | 656  | 721   | 1 |
| 2557 | YPL263C               | C | KEL3   | 1422 | 2150  | 0 |
| 2558 | YPL272C               | C |        | 501  | 498   | 0 |
| 2559 | YPR010C               | C | RPA135 | 1357 | 1374  | 2 |
| 2560 | YPR044C               | C |        | 2320 | 2630  | 0 |
| 2561 | YPR134W               | W | MSS18  | 448  | 531   | 0 |
| 2562 | YPR152C               | C |        | 428  | 456   | 0 |
| 2563 | EMPTY                 |   |        | 313  | 261   | 0 |
| 2564 | EMPTY                 |   |        | 306  | 243   | 0 |
| 2565 | EMPTY                 |   |        | 251  | 184   | 0 |
| 2566 | EMPTY                 |   |        | 185  | 152   | 0 |
| 2567 | EMPTY                 |   |        | 267  | 226   | 0 |
| 2568 | EMPTY                 |   |        | 275  | 250   | 0 |
| 2569 | YBR098W               | W | MMS4   | 387  | 413   | 0 |
| 2570 | YBR128C               | C | APG14  | 740  | 784   | 0 |
| 2571 | YBR156C               | C | SLI15  | 759  | 1478  | 2 |
| 2572 | YBR214W               | W | SDS24  | 725  | 780   | 0 |
| 2573 | YBR227C               | C | MCX1   | 532  | 790   | 0 |
| 2574 | YBR299W               | W | MAL32  | 341  | 300   | 0 |
| 2575 | EMPTY                 |   |        | 307  | 240   | 0 |
| 2576 | EMPTY                 |   |        | 300  | 240   | 0 |
| 2577 | EMPTY                 |   |        | 317  | 248   | 0 |
| 2578 | EMPTY                 |   |        | 309  | 264   | 0 |
| 2579 | EMPTY                 |   |        | 305  | 241   | 0 |
| 2580 | EMPTY                 |   |        | 302  | 250   | 0 |
| 2581 | EMPTY                 |   |        | 310  | 255   | 0 |
| 2582 | EMPTY                 |   |        | 307  | 241   | 0 |
| 2583 | EMPTY                 |   |        | 307  | 238   | 0 |
| 2584 | EMPTY                 |   |        | 298  | 226   | 0 |
| 2585 | EMPTY                 |   |        | 293  | 227   | 0 |
| 2586 | EMPTY                 |   |        | 286  | 228   | 0 |
| 2587 | EMPTY                 |   |        | 287  | 221   | 0 |
| 2588 | EMPTY                 |   |        | 285  | 225   | 0 |
| 2589 | EMPTY                 |   |        | 287  | 237   | 0 |
| 2590 | EMPTY                 |   |        | 300  | 237   | 0 |
| 2591 | EMPTY                 |   |        | 231  | 178   | 0 |
| 2592 | EMPTY                 |   |        | 178  | 145   | 0 |
| 2593 | CY3 0.1X              |   |        | 304  | 244   | 0 |
| 2594 | 3XSSC                 |   |        | 299  | 237   | 0 |
| 2595 | 3XSSC                 |   |        | 329  | 249   | 0 |
| 2596 | CY5 0.1X              |   |        | 303  | 235   | 0 |
| 2597 | 3XSSC                 |   |        | 299  | 251   | 0 |
| 2598 | 3XSSC                 |   |        | 318  | 257   | 0 |
| 2599 | EMPTY                 |   |        | 311  | 244   | 0 |

|      |           |       |      |      |   |
|------|-----------|-------|------|------|---|
| 2600 | EMPTY     |       | 321  | 255  | 0 |
| 2601 | EMPTY     |       | 309  | 248  | 0 |
| 2602 | EMPTY     |       | 315  | 242  | 0 |
| 2603 | EMPTY     |       | 307  | 255  | 0 |
| 2604 | EMPTY     |       | 308  | 241  | 0 |
| 2605 | EMPTY     |       | 306  | 253  | 0 |
| 2606 | EMPTY     |       | 301  | 240  | 0 |
| 2607 | EMPTY     |       | 308  | 245  | 0 |
| 2608 | EMPTY     |       | 302  | 244  | 0 |
| 2609 | EMPTY     |       | 313  | 242  | 0 |
| 2610 | EMPTY     |       | 311  | 227  | 0 |
| 2611 | EMPTY     |       | 282  | 226  | 0 |
| 2612 | EMPTY     |       | 280  | 221  | 0 |
| 2613 | EMPTY     |       | 282  | 227  | 0 |
| 2614 | EMPTY     |       | 284  | 233  | 0 |
| 2615 | EMPTY     |       | 284  | 241  | 0 |
| 2616 | EMPTY     |       | 302  | 252  | 0 |
| 2617 | CY3 0.1X  |       | 9241 | 313  | 0 |
| 2618 | 3XSSC     |       | 332  | 283  | 0 |
| 2619 | 3XSSC     |       | 344  | 305  | 0 |
| 2620 | CY5 0.1X  |       | 435  | 382  | 0 |
| 2621 | 3XSSC     |       | 358  | 341  | 0 |
| 2622 | 3XSSC     |       | 294  | 238  | 0 |
| 2623 | EMPTY     |       | 1965 | 2389 | 0 |
| 2624 | EMPTY     |       | 321  | 249  | 0 |
| 2625 | EMPTY     |       | 325  | 249  | 0 |
| 2626 | EMPTY     |       | 316  | 237  | 0 |
| 2627 | EMPTY     |       | 304  | 248  | 0 |
| 2628 | EMPTY     |       | 314  | 241  | 0 |
| 2629 | EMPTY     |       | 303  | 251  | 0 |
| 2630 | EMPTY     |       | 318  | 253  | 0 |
| 2631 | EMPTY     |       | 295  | 233  | 0 |
| 2632 | EMPTY     |       | 295  | 234  | 0 |
| 2633 | EMPTY     |       | 295  | 228  | 0 |
| 2634 | EMPTY     |       | 297  | 221  | 0 |
| 2635 | EMPTY     |       | 284  | 221  | 0 |
| 2636 | EMPTY     |       | 288  | 221  | 0 |
| 2637 | EMPTY     |       | 297  | 236  | 0 |
| 2638 | EMPTY     |       | 291  | 243  | 0 |
| 2639 | EMPTY     |       | 286  | 235  | 0 |
| 2640 | EMPTY     |       | 289  | 245  | 0 |
| 2641 | YBR195C C | MSI1  | 863  | 1058 | 0 |
| 2642 | YBR197C C |       | 889  | 947  | 0 |
| 2643 | YBR199W W | KTR4  | 374  | 378  | 1 |
| 2644 | YBR201W W | DER1  | 474  | 515  | 0 |
| 2645 | YBR203W W |       | 365  | 292  | 0 |
| 2646 | YBR205W W | KTR3  | 1741 | 2154 | 0 |
| 2647 | YBR291C C | CTP1  | 728  | 608  | 0 |
| 2648 | YBR293W W |       | 722  | 732  | 0 |
| 2649 | YBR295W W | PCA1  | 301  | 261  | 0 |
| 2650 | YBR297W W | MAL33 | 399  | 330  | 0 |
| 2651 | YBR299W W | MAL32 | 313  | 253  | 1 |

|      |           |   |        |      |      |   |
|------|-----------|---|--------|------|------|---|
| 2652 | YBR301W   | W | DAN3   | 1072 | 940  | 0 |
| 2653 | YCR001W   | W |        | 263  | 246  | 1 |
| 2654 | YCR003W   | W | MRPL32 | 744  | 1005 | 0 |
| 2655 | YCR005C   | C | CIT2   | 586  | 1446 | 0 |
| 2656 | YCR007C   | C |        | 408  | 433  | 0 |
| 2657 | YCR009C   | C | RVS161 | 299  | 262  | 1 |
| 2658 | YCR011C   | C | ADP1   | 820  | 1150 | 0 |
| 2659 | YCR095C   | C |        | 667  | 824  | 0 |
| 2660 | YCR097W-A |   |        | 405  | 447  | 0 |
| 2661 | YCR098C   | C | GIT1   | 374  | 396  | 0 |
| 2662 | YCR100C   | C |        | 527  | 489  | 0 |
| 2663 | YCR102C   | C |        | 598  | 435  | 0 |
| 2664 | YCR104W   | W | PAU3   | 738  | 658  | 0 |
| 2665 | YDL062W   | W |        | 809  | 962  | 0 |
| 2666 | YDL064W   | W | UBC9   | 1096 | 1364 | 0 |
| 2667 | YDL066W   | W | IDP1   | 1615 | 2059 | 0 |
| 2668 | YDL068W   | W |        | 520  | 523  | 0 |
| 2669 | YDL070W   | W | BDF2   | 1017 | 1002 | 0 |
| 2670 | YDL072C   | C |        | 1809 | 2491 | 0 |
| 2671 | YDL158C   | C |        | 603  | 665  | 0 |
| 2672 | YDL160C   | C | DHH1   | 3414 | 3374 | 0 |
| 2673 | YDL162C   | C |        | 426  | 375  | 0 |
| 2674 | YDL164C   | C | CDC9   | 1236 | 1461 | 0 |
| 2675 | YDL166C   | C | FAP7   | 1030 | 1446 | 0 |
| 2676 | YDL168W   | W | SFA1   | 2454 | 3022 | 0 |
| 2677 | YDR006C   | C | SOK1   | 460  | 587  | 0 |
| 2678 | YDR008C   | C |        | 679  | 1020 | 0 |
| 2679 | YDR010C   | C |        | 352  | 329  | 0 |
| 2680 | YDR012W   | W | RPL4B  | 8171 | 7711 | 0 |
| 2681 | YDR014W   | W |        | 610  | 691  | 0 |
| 2682 | YDR016C   | C | DAD1   | 712  | 780  | 0 |
| 2683 | YDR102C   | C |        | 417  | 381  | 0 |
| 2684 | YDR104C   | C | SP071  | 681  | 1075 | 0 |
| 2685 | YDR106W   | W | ARP10  | 394  | 350  | 0 |
| 2686 | YDR108W   | W | GSG1   | 928  | 1089 | 0 |
| 2687 | YDR110W   | W | FOB1   | 1176 | 1604 | 0 |
| 2688 | YDR112W   | W |        | 839  | 688  | 0 |
| 2689 | YDR198C   | C |        | 739  | 902  | 0 |
| 2690 | YDR200C   | C |        | 889  | 1017 | 0 |
| 2691 | YDR202C   | C | RAV2   | 867  | 1147 | 0 |
| 2692 | YDR204W   | W | COQ4   | 976  | 1566 | 0 |
| 2693 | YDR206W   | W | EBS1   | 604  | 776  | 0 |
| 2694 | YDR208W   | W | MSS4   | 459  | 579  | 0 |
| 2695 | YDR294C   | C | DPL1   | 1495 | 2144 | 0 |
| 2696 | YDR296W   | W | MHR1   | 555  | 796  | 1 |
| 2697 | YDR298C   | C | ATP5   | 1816 | 1496 | 0 |
| 2698 | YDR300C   | C | PRO1   | 1238 | 1642 | 0 |
| 2699 | YDR302W   | W | GPI11  | 1011 | 997  | 0 |
| 2700 | YDR304C   | C | CPR5   | 2134 | 3194 | 0 |
| 2701 | YDR390C   | C | UBA2   | 579  | 781  | 0 |
| 2702 | YDR392W   | W | SPT3   | 769  | 1042 | 0 |
| 2703 | YDR394W   | W | RPT3   | 1946 | 3064 | 0 |

|      |            |   |        |      |      |   |
|------|------------|---|--------|------|------|---|
| 2704 | YDR396W    | W |        | 1251 | 1873 | 0 |
| 2705 | YDR398W    | W |        | 1438 | 2591 | 0 |
| 2706 | YDR400W    | W | URH1   | 1270 | 1562 | 0 |
| 2707 | YDR486C    | C | VPS60  | 756  | 1117 | 0 |
| 2708 | YDR488C    | C | PAC11  | 550  | 594  | 0 |
| 2709 | YDR490C    | C | PKH1   | 873  | 1134 | 0 |
| 2710 | YDR492W    | W |        | 1234 | 1569 | 0 |
| 2711 | YDR494W    | W | RCT1   | 900  | 1120 | 0 |
| 2712 | YDR496C    | C | PUF6   | 2491 | 3860 | 0 |
| 2713 | YAL036C    | C | FUN11  | 637  | 1002 | 0 |
| 2714 | YAL038W    | W | CDC19  | 2363 | 2734 | 0 |
| 2715 | YAL040C    | C | CLN3   | 607  | 632  | 0 |
| 2716 | YAL042W    | W | ERV46  | 958  | 1279 | 0 |
| 2717 | YAL044C    | C | GCV3   | 1006 | 2266 | 0 |
| 2718 | YAL046C    | C |        | 1658 | 1363 | 0 |
| 2719 | YBL027W    | W | RPL19B | 4315 | 5442 | 0 |
| 2720 | YBL029W    | W |        | 488  | 490  | 0 |
| 2721 | YBL031W    | W | SHE1   | 575  | 611  | 0 |
| 2722 | YBL033C    | C | RIB1   | 464  | 559  | 1 |
| 2723 | YBL035C    | C | POL12  | 647  | 949  | 0 |
| 2724 | YBL037W    | W | APL3   | 453  | 450  | 0 |
| 2725 | YBR008C    | C | FLR1   | 490  | 494  | 0 |
| 2726 | YBR010W    | W | HHT1   | 6197 | 5437 | 0 |
| 2727 | YBR012C    | C |        | 470  | 578  | 0 |
| 2728 | YBR012W-FW |   |        | 634  | 784  | 0 |
| 2729 | YBR014C    | C |        | 882  | 1927 | 0 |
| 2730 | YBR016W    | W |        | 1950 | 3088 | 0 |
| 2731 | YBR100W    | W |        | 464  | 435  | 0 |
| 2732 | YBR102C    | C | EX084  | 954  | 1279 | 0 |
| 2733 | YBR104W    | W | YMC2   | 753  | 1143 | 0 |
| 2734 | YBR106W    | W | PH088  | 4049 | 5112 | 0 |
| 2735 | YBR108W    | W |        | 691  | 861  | 0 |
| 2736 | YBR110W    | W | ALG1   | 1048 | 1231 | 0 |
| 2737 | YEL036C    | C | ANP1   | 774  | 1110 | 0 |
| 2738 | YEL038W    | W | UTR4   | 1178 | 1336 | 0 |
| 2739 | YEL040W    | W | UTR2   | 1373 | 1600 | 0 |
| 2740 | YEL042W    | W | GDA1   | 715  | 771  | 0 |
| 2741 | YEL044W    | W | IES6   | 647  | 803  | 0 |
| 2742 | YEL046C    | C | GLY1   | 2085 | 2336 | 0 |
| 2743 | YER053C    | C |        | 1077 | 1106 | 0 |
| 2744 | YER055C    | C | HIS1   | 2887 | 3220 | 0 |
| 2745 | YER056C    | C | FCY2   | 2681 | 3991 | 0 |
| 2746 | YER058W    | W | PET117 | 529  | 735  | 0 |
| 2747 | YER060W    | W | FCY21  | 829  | 963  | 2 |
| 2748 | YER062C    | C | HOR2   | 4674 | 9601 | 0 |
| 2749 | YER147C    | C | SCC4   | 557  | 651  | 0 |
| 2750 | YER149C    | C | PEA2   | 890  | 1159 | 0 |
| 2751 | YER151C    | C | UBP3   | 1551 | 2185 | 0 |
| 2752 | YER153C    | C | PET122 | 275  | 235  | 1 |
| 2753 | YER155C    | C | BEM2   | 333  | 311  | 0 |
| 2754 | YER157W    | W | SEC34  | 959  | 1164 | 0 |
| 2755 | YFL050C    | C | ALR2   | 286  | 213  | 1 |

|      |         |   |         |       |       |   |
|------|---------|---|---------|-------|-------|---|
| 2756 | YFL052W | W |         | 356   | 251   | 0 |
| 2757 | YFL054C | C |         | 428   | 457   | 0 |
| 2758 | YFL056C | C | AAD6    | 606   | 602   | 0 |
| 2759 | YFL058W | W | THI5    | 523   | 488   | 0 |
| 2760 | YFL060C | C | SN03    | 622   | 666   | 0 |
| 2761 | YGL020C | C |         | 1450  | 1641  | 0 |
| 2762 | YGL022W | W | STT3    | 3590  | 3620  | 0 |
| 2763 | YGL024W | W |         | 483   | 531   | 0 |
| 2764 | YGL026C | C | TRP5    | 4020  | 4662  | 0 |
| 2765 | YGL028C | C | SCW11   | 2782  | 5146  | 0 |
| 2766 | YGL030W | W | RPL30   | 2797  | 2944  | 0 |
| 2767 | YGL116W | W | CDC20   | 886   | 1195  | 0 |
| 2768 | YGL118C | C |         | 357   | 320   | 0 |
| 2769 | YGL120C | C | PRP43   | 2362  | 3022  | 0 |
| 2770 | YGL122C | C | NAB2    | 653   | 995   | 1 |
| 2771 | YGL124C | C | MON1    | 641   | 774   | 0 |
| 2772 | YGL126W | W | SCS3    | 265   | 224   | 1 |
| 2773 | YGL212W | W | VAM7    | 596   | 657   | 0 |
| 2774 | YGL214W | W |         | 361   | 363   | 1 |
| 2775 | YGL216W | W | KIP3    | 616   | 684   | 0 |
| 2776 | YGL218W | W |         | 641   | 782   | 0 |
| 2777 | YGL220W | W |         | 975   | 1376  | 0 |
| 2778 | YGL222C | C | EDC1    | 526   | 613   | 0 |
| 2779 | YGR045C | C |         | 364   | 325   | 0 |
| 2780 | YGR047C | C | TFC4    | 1188  | 1468  | 0 |
| 2781 | YGR049W | W | SCM4    | 811   | 866   | 0 |
| 2782 | YGR051C | C |         | 394   | 359   | 0 |
| 2783 | YGR053C | C |         | 366   | 376   | 0 |
| 2784 | YGR055W | W | MUP1    | 2648  | 3964  | 0 |
| 2785 | YGR141W | W |         | 776   | 1136  | 0 |
| 2786 | YGR143W | W | SKN1    | 1145  | 1326  | 0 |
| 2787 | YGR145W | W |         | 810   | 1237  | 0 |
| 2788 | YGR147C | C | NAT2    | 1165  | 1515  | 0 |
| 2789 | YGR149W | W |         | 835   | 1076  | 0 |
| 2790 | YGR151C | C |         | 1020  | 1507  | 0 |
| 2791 | YGR237C | C |         | 664   | 804   | 0 |
| 2792 | YGR239C | C | PEX21   | 584   | 802   | 0 |
| 2793 | YGR241C | C | YAP1802 | 1114  | 1221  | 0 |
| 2794 | YGR243W | W |         | 420   | 332   | 0 |
| 2795 | YGR245C | C | SDA1    | 1299  | 1762  | 0 |
| 2796 | YGR247W | W |         | 408   | 344   | 0 |
| 2797 | YHL037C | C |         | 335   | 271   | 0 |
| 2798 | YHL039W | W |         | 1319  | 1544  | 0 |
| 2799 | YHL041W | W |         | 344   | 255   | 0 |
| 2800 | YHL043W | W | ECM34   | 474   | 423   | 0 |
| 2801 | YHL045W | W |         | 249   | 216   | 0 |
| 2802 | YHL047C | C | TAF1    | 551   | 518   | 0 |
| 2803 | YHR081W | W |         | 933   | 1017  | 0 |
| 2804 | YHR083W | W |         | 1424  | 1716  | 0 |
| 2805 | YHR085W | W |         | 32449 | 29516 | 1 |
| 2806 | YHR087W | W |         | 2094  | 2421  | 0 |
| 2807 | YHR089C | C | GAR1    | 2440  | 2884  | 0 |

|      |         |   |       |       |       |   |
|------|---------|---|-------|-------|-------|---|
| 2808 | YHR091C | C | MSR1  | 623   | 795   | 0 |
| 2809 | YHR176W | W |       | 524   | 566   | 0 |
| 2810 | YHR178W | W | STB5  | 774   | 780   | 0 |
| 2811 | YHR180W | W |       | 430   | 414   | 0 |
| 2812 | YHR182W | W |       | 505   | 612   | 0 |
| 2813 | YHR184W | W | SSP1  | 362   | 270   | 0 |
| 2814 | YHR186C | C |       | 616   | 682   | 0 |
| 2815 | YIL053W | W | RHR2  | 6897  | 10673 | 0 |
| 2816 | YIL055C | C |       | 283   | 239   | 1 |
| 2817 | YIL057C | C |       | 348   | 281   | 0 |
| 2818 | YIL059C | C |       | 543   | 554   | 0 |
| 2819 | YIL061C | C | SNP1  | 562   | 670   | 0 |
| 2820 | YIL063C | C | YRB2  | 1055  | 1807  | 0 |
| 2821 | YIL150C | C | DNA43 | 654   | 827   | 0 |
| 2822 | YIL152W | W |       | 712   | 772   | 0 |
| 2823 | YIL154C | C | IMP2' | 362   | 358   | 0 |
| 2824 | YIL156W | W | UBP7  | 748   | 908   | 0 |
| 2825 | YIL158W | W |       | 980   | 1068  | 0 |
| 2826 | YIL160C | C | POT1  | 425   | 397   | 0 |
| 2827 | YJL025W | W | RRN7  | 618   | 755   | 0 |
| 2828 | YJL027C | C |       | 331   | 201   | 1 |
| 2829 | YJL029C | C | VPS53 | 19188 | 17302 | 0 |
| 2830 | YJL031C | C | BET4  | 7536  | 4807  | 0 |
| 2831 | YJL033W | W | HCA4  | 645   | 871   | 0 |
| 2832 | YJL035C | C | TAD2  | 574   | 474   | 0 |
| 2833 | YJL122W | W |       | 1250  | 1782  | 0 |
| 2834 | YJL124C | C | LSM1  | 1799  | 2506  | 0 |
| 2835 | YJL126W | W | NIT2  | 641   | 793   | 0 |
| 2836 | YJL128C | C | PBS2  | 1022  | 1378  | 0 |
| 2837 | YJL130C | C | URA2  | 407   | 297   | 1 |
| 2838 | YJL132W | W |       | 324   | 295   | 0 |
| 2839 | YJL218W | W |       | 468   | 466   | 0 |
| 2840 | YJL220W | W |       | 269   | 238   | 1 |
| 2841 | YJL222W | W | VTH2  | 458   | 477   | 0 |
| 2842 | YJL225C | C |       | 1362  | 1672  | 0 |
| 2843 | YJR002W | W | MPP10 | 1508  | 2033  | 0 |
| 2844 | YJR004C | C | SAG1  | 610   | 553   | 0 |
| 2845 | YJR090C | C | GRR1  | 812   | 924   | 0 |
| 2846 | YJR092W | W | BUD4  | 547   | 581   | 0 |
| 2847 | YJR094C | C | IME1  | 453   | 377   | 0 |
| 2848 | YJR096W | W |       | 651   | 1913  | 0 |
| 2849 | YJR098C | C |       | 482   | 491   | 0 |
| 2850 | YJR100C | C |       | 523   | 684   | 0 |
| 2851 | YKL023W | W |       | 799   | 1013  | 0 |
| 2852 | YKL025C | C | PAN3  | 1270  | 1276  | 0 |
| 2853 | YKL027W | W |       | 830   | 1028  | 0 |
| 2854 | YKL029C | C | MAE1  | 1249  | 1417  | 0 |
| 2855 | YKL031W | W |       | 364   | 305   | 0 |
| 2856 | YKL033W | W |       | 362   | 376   | 0 |
| 2857 | YKL118W | W |       | 464   | 490   | 0 |
| 2858 | YKL120W | W | OAC1  | 654   | 863   | 0 |
| 2859 | YKL122C | C | SRP21 | 1911  | 2885  | 0 |

|      |         |   |        |      |      |   |
|------|---------|---|--------|------|------|---|
| 2860 | YKL124W | W | SSH4   | 589  | 627  | 0 |
| 2861 | YKL126W | W | YPK1   | 1484 | 1664 | 0 |
| 2862 | YKL128C | C | PMU1   | 1253 | 1818 | 0 |
| 2863 | YKL214C | C |        | 918  | 1102 | 0 |
| 2864 | YKL216W | W | URA1   | 5863 | 2873 | 0 |
| 2865 | YKL218C | C | SRY1   | 497  | 620  | 0 |
| 2866 | YKL220C | C | FRE2   | 685  | 548  | 0 |
| 2867 | YKL222C | C |        | 519  | 566  | 0 |
| 2868 | YKL224C | C |        | 826  | 724  | 0 |
| 2869 | YKR085C | C | MRPL20 | 387  | 484  | 0 |
| 2870 | YKR087C | C |        | 598  | 694  | 0 |
| 2871 | YKR089C | C |        | 860  | 991  | 0 |
| 2872 | YKR091W | W | SRL3   | 379  | 474  | 0 |
| 2873 | YKR093W | W | PTR2   | 1625 | 1417 | 0 |
| 2874 | YKR095W | W | MLP1   | 263  | 223  | 1 |
| 2875 | YLR008C | C |        | 816  | 1261 | 0 |
| 2876 | YLR010C | C |        | 325  | 355  | 0 |
| 2877 | YLR012C | C |        | 310  | 241  | 0 |
| 2878 | YLR014C | C | PPR1   | 348  | 426  | 0 |
| 2879 | YLR016C | C |        | 502  | 637  | 0 |
| 2880 | YLR018C | C | POM34  | 741  | 1076 | 0 |
| 2881 | YLR104W | W |        | 837  | 1128 | 0 |
| 2882 | YLR106C | C |        | 311  | 352  | 1 |
| 2883 | YLR108C | C |        | 936  | 819  | 0 |
| 2884 | YLR110C | C | CCW12  | 3022 | 3121 | 0 |
| 2885 | YLR112W | W |        | 466  | 423  | 0 |
| 2886 | YLR114C | C | EFR4   | 444  | 506  | 1 |
| 2887 | YLR200W | W | YKE2   | 852  | 1166 | 0 |
| 2888 | YLR202C | C |        | 659  | 773  | 0 |
| 2889 | YLR204W | W | QRI5   | 784  | 1040 | 0 |
| 2890 | YLR206W | W | ENT2   | 262  | 242  | 1 |
| 2891 | YLR208W | W | SEC13  | 1862 | 2337 | 0 |
| 2892 | YLR210W | W | CLB4   | 531  | 575  | 0 |
| 2893 | YLR296W | W |        | 286  | 236  | 0 |
| 2894 | YLR298C | C | YHC1   | 589  | 743  | 0 |
| 2895 | YLR300W | W | EXG1   | 5126 | 6366 | 0 |
| 2896 | YLR302C | C |        | 372  | 400  | 0 |
| 2897 | YLR304C | C | AC01   | 3140 | 6008 | 0 |
| 2898 | YLR306W | W | UBC12  | 613  | 588  | 0 |
| 2899 | YLR392C | C |        | 550  | 545  | 0 |
| 2900 | YLR394W | W | CST9   | 585  | 584  | 0 |
| 2901 | YLR396C | C | VPS33  | 769  | 935  | 0 |
| 2902 | YLR398C | C | SKI2   | 450  | 523  | 0 |
| 2903 | YLR400W | W |        | 583  | 711  | 0 |
| 2904 | YLR402W | W |        | 451  | 391  | 0 |
| 2905 | YML023C | C |        | 934  | 949  | 0 |
| 2906 | YML028W | W | TSA1   | 4154 | 6360 | 0 |
| 2907 | YML030W | W |        | 759  | 996  | 0 |
| 2908 | YML032C | C | RAD52  | 467  | 610  | 0 |
| 2909 | YML034W | W | SRC1   | 652  | 763  | 0 |
| 2910 | YML037C | C |        | 502  | 552  | 0 |
| 2911 | YMR001C | C | CDC5   | 1383 | 1371 | 0 |

|      |         |   |        |      |      |   |
|------|---------|---|--------|------|------|---|
| 2912 | YMR003W | W |        | 562  | 551  | 0 |
| 2913 | YMR005W | W | MPT1   | 1383 | 2252 | 0 |
| 2914 | YMR008C | C | PLB1   | 1549 | 2041 | 2 |
| 2915 | YMR010W | W |        | 1253 | 1361 | 0 |
| 2916 | YMR012W | W | CLU1   | 351  | 316  | 1 |
| 2917 | YMR106C | C | YKU80  | 476  | 535  | 0 |
| 2918 | YMR108W | W | ILV2   | 2371 | 2570 | 0 |
| 2919 | YMR110C | C |        | 1112 | 1337 | 0 |
| 2920 | YMR112C | C | MED11  | 581  | 704  | 0 |
| 2921 | YMR114C | C |        | 489  | 524  | 0 |
| 2922 | YMR118C | C |        | 699  | 696  | 0 |
| 2923 | YMR213W | W | CEF1   | 678  | 805  | 0 |
| 2924 | YMR215W | W |        | 2639 | 1750 | 0 |
| 2925 | YMR217W | W | GUA1   | 5226 | 4228 | 0 |
| 2926 | YMR219W | W | ESC1   | 331  | 304  | 1 |
| 2927 | YMR221C | C |        | 1003 | 1080 | 0 |
| 2928 | YMR223W | W | UBP8   | 707  | 788  | 0 |
| 2929 | YMR318C | C |        | 3006 | 4558 | 0 |
| 2930 | YMR320W | W |        | 477  | 443  | 0 |
| 2931 | YMR322C | C |        | 554  | 398  | 0 |
| 2932 | YMR325C |   |        | 741  | 675  | 0 |
| 2933 | YNL001W | W | DOM34  | 1068 | 1549 | 0 |
| 2934 | YNL003C | C | PET8   | 924  | 911  | 0 |
| 2935 | YNL089C | C |        | 815  | 984  | 0 |
| 2936 | YNL091W | W |        | 1004 | 1380 | 0 |
| 2937 | YNL093W | W | YPT53  | 354  | 304  | 0 |
| 2938 | YNL095C | C |        | 720  | 762  | 0 |
| 2939 | YNL097C | C | PH023  | 678  | 718  | 0 |
| 2940 | YNL099C | C |        | 1257 | 1601 | 0 |
| 2941 | YNL185C | C | MRPL19 | 846  | 1004 | 0 |
| 2942 | YNL187W | W |        | 509  | 643  | 0 |
| 2943 | YNL189W | W | SRP1   | 2189 | 2932 | 0 |
| 2944 | YNL191W | W |        | 648  | 1047 | 0 |
| 2945 | YNL193W | W |        | 687  | 817  | 0 |
| 2946 | YNL195C | C |        | 393  | 433  | 0 |
| 2947 | YNL281W | W | HCH1   | 1514 | 2837 | 0 |
| 2948 | YNL283C | C | WSC2   | 1880 | 1992 | 0 |
| 2949 | YNL285W | W |        | 455  | 469  | 0 |
| 2950 | YNL287W | W | SEC21  | 2556 | 2564 | 0 |
| 2951 | YNL289W | W | PCL1   | 352  | 351  | 1 |
| 2952 | YNL291C | C | MID1   | 1364 | 1357 | 0 |
| 2953 | YNR038W | W | DBP6   | 1065 | 1470 | 0 |
| 2954 | YNR040W | W |        | 319  | 298  | 1 |
| 2955 | YNR042W | W |        | 891  | 1001 | 0 |
| 2956 | YNR044W | W | AGA1   | 1949 | 4165 | 0 |
| 2957 | YNR046W | W |        | 1271 | 1546 | 0 |
| 2958 | YNR048W | W |        | 338  | 344  | 0 |
| 2959 | YOL056W | W | GPM3   | 637  | 739  | 0 |
| 2960 | YOL058W | W | ARG1   | 1088 | 970  | 0 |
| 2961 | YOL060C | C | AMI3   | 1229 | 1198 | 0 |
| 2962 | YOL062C | C | APM4   | 937  | 1006 | 0 |
| 2963 | YOL064C | C | MET22  | 1099 | 1211 | 0 |

|      |         |   |        |      |      |   |
|------|---------|---|--------|------|------|---|
| 2964 | YOL066C | C | RIB2   | 564  | 733  | 0 |
| 2965 | YOL152W | W | FRE7   | 482  | 597  | 0 |
| 2966 | YOL154W | W |        | 428  | 421  | 0 |
| 2967 | YOL156W | W | HXT11  | 490  | 444  | 0 |
| 2968 | YOL158C | C | ENB1   | 809  | 961  | 0 |
| 2969 | YOL160W | W |        | 327  | 265  | 0 |
| 2970 | YOL162W | W |        | 405  | 348  | 0 |
| 2971 | YOR082C | C |        | 462  | 419  | 0 |
| 2972 | YOR084W | W |        | 448  | 389  | 0 |
| 2973 | YOR086C | C |        | 1184 | 1441 | 1 |
| 2974 | YOR088W | W |        | 980  | 996  | 0 |
| 2975 | YOR090C | C | PTC5   | 1036 | 1338 | 0 |
| 2976 | YOR092W | W | ECM3   | 1334 | 1299 | 0 |
| 2977 | YOR178C | C | GAC1   | 455  | 412  | 0 |
| 2978 | YOR180C | C | DCI1   | 510  | 500  | 0 |
| 2979 | YOR182C | C | RPS30B | 1538 | 2072 | 0 |
| 2980 | YOR184W | W | SER1   | 1988 | 3137 | 0 |
| 2981 | YOR186W | W |        | 323  | 280  | 0 |
| 2982 | YOR188W | W | MSB1   | 806  | 1174 | 0 |
| 2983 | YOR274W | W | MOD5   | 537  | 661  | 0 |
| 2984 | YOR276W | W | CAF20  | 2007 | 2200 | 0 |
| 2985 | YOR278W | W | HEM4   | 641  | 778  | 0 |
| 2986 | YOR280C | C |        | 628  | 818  | 0 |
| 2987 | YOR282W | W |        | 483  | 541  | 0 |
| 2988 | YOR284W | W |        | 480  | 448  | 0 |
| 2989 | YOR370C | C | MRS6   | 744  | 703  | 2 |
| 2990 | YOR372C | C | NDD1   | 977  | 414  | 0 |
| 2991 | YOR374W | W | ALD4   | 1036 | 2477 | 0 |
| 2992 | YOR376W | W |        | 337  | 206  | 0 |
| 2993 | YOR378W | W |        | 333  | 303  | 0 |
| 2994 | YOR380W | W |        | 285  | 243  | 2 |
| 2995 | YPL072W | W | UBP16  | 424  | 430  | 0 |
| 2996 | YPL074W | W | YTA6   | 250  | 202  | 1 |
| 2997 | YPL076W | W | GPI2   | 467  | 466  | 0 |
| 2998 | YPL078C | C | ATP4   | 1892 | 2511 | 0 |
| 2999 | YPL080C | C |        | 381  | 404  | 0 |
| 3000 | YPL082C | C | MOT1   | 254  | 204  | 1 |
| 3001 | YPL168W | W |        | 525  | 601  | 0 |
| 3002 | YPL170W | W |        | 433  | 514  | 0 |
| 3003 | YPL172C | C | COX10  | 483  | 472  | 0 |
| 3004 | YPL174C | C | NIP100 | 285  | 280  | 0 |
| 3005 | YPL176C | C |        | 625  | 750  | 0 |
| 3006 | YPL178W | W | CBC2   | 1080 | 1382 | 0 |
| 3007 | YPL264C | C |        | 441  | 402  | 0 |
| 3008 | YPL266W | W | DIM1   | 1267 | 1532 | 0 |
| 3009 | YPL268W | W | PLC1   | 411  | 494  | 0 |
| 3010 | YPL270W | W | MDL2   | 1110 | 1187 | 0 |
| 3011 | YPL272C | C |        | 481  | 397  | 2 |
| 3012 | YPL274W | W | SAM3   | 895  | 996  | 0 |
| 3013 | YPR077C | C |        | 310  | 270  | 0 |
| 3014 | YPR079W | W | MRL1   | 752  | 703  | 0 |
| 3015 | YPR081C | C |        | 850  | 583  | 0 |

|      |             |   |        |       |       |   |
|------|-------------|---|--------|-------|-------|---|
| 3016 | YPR083W     | W |        | 923   | 533   | 0 |
| 3017 | YPR085C     | C |        | 676   | 591   | 0 |
| 3018 | YPR087W     | W |        | 1225  | 1651  | 0 |
| 3019 | YPR173C     | C | VPS4   | 1517  | 2416  | 0 |
| 3020 | YPR175W     | W | DPB2   | 248   | 184   | 0 |
| 3021 | YPR177C     | C |        | 463   | 397   | 0 |
| 3022 | YPR179C     | C | PL01   | 723   | 778   | 0 |
| 3023 | YPR181C     | C | SEC23  | 3430  | 3040  | 0 |
| 3024 | YPR183W     | W | DPM1   | 2696  | 2484  | 0 |
| 3025 | NORF 26     |   |        | 441   | 429   | 0 |
| 3026 | NORF 30     |   |        | 1611  | 2907  | 0 |
| 3027 | NORF 34     |   |        | 2199  | 2998  | 0 |
| 3028 | NORF 38     |   |        | 3344  | 4039  | 0 |
| 3029 | NORF 42     |   |        | 474   | 450   | 0 |
| 3030 | NORF 46     |   |        | 433   | 454   | 0 |
| 3031 | YCL070/73C  |   |        | 572   | 649   | 0 |
| 3032 | YCR009C     | C | RVS161 | 1361  | 2118  | 0 |
| 3033 | YCR027C     | C | RSG1   | 588   | 641   | 0 |
| 3034 | YCR029C-A   |   |        | 1197  | 1341  | 0 |
| 3035 | YCR033W     | W | SNT1   | 861   | 1091  | 2 |
| 3036 | YCR054C     | C | CTR86  | 453   | 557   | 0 |
| 3037 | YGR184C     | C | UBR1   | 848   | 1055  | 3 |
| 3038 | YGR254W     | W | ENO1   | 10253 | 12389 | 0 |
| 3039 | YGR284C     | C | ERV29  | 1404  | 1702  | 0 |
| 3040 | YGR296W     | W | YRF1-3 | 1236  | 1079  | 0 |
| 3041 | YHR006W     | W | STP2   | 872   | 843   | 0 |
| 3042 | YHR008C     | C | SOD2   | 2198  | 3225  | 0 |
| 3043 | YML087C     | C |        | 481   | 334   | 0 |
| 3044 | YMR012W     | W | CLU1   | 2482  | 2620  | 0 |
| 3045 | YMR047C     | C | NUP116 | 879   | 882   | 2 |
| 3046 | YMR102C     | C |        | 666   | 720   | 0 |
| 3047 | YMR128W     | W | ECM16  | 842   | 1084  | 0 |
| 3048 | YMR165C     | C | SMP2   | 795   | 1048  | 0 |
| 3049 | YPR070W     | W | MED1   | 742   | 938   | 0 |
| 3050 | YPR083W     | W |        | 556   | 601   | 0 |
| 3051 | YPR117W     | W |        | 303   | 279   | 1 |
| 3052 | YPR160W     | W | GPH1   | 561   | 1577  | 2 |
| 3053 | YPR168W     | W | NUT2   | 540   | 669   | 0 |
| 3054 | YPR195C     | C |        | 413   | 380   | 0 |
| 3055 | YER056C-1 C |   | RPL34A | 2833  | 3723  | 0 |
| 3056 | YMR286W     | W | MRPL33 | 587   | 754   | 0 |
| 3057 | YDR241W     | W | BUD26  | 303   | 287   | 0 |
| 3058 | YDR243C     | C | PRP28  | 469   | 545   | 0 |
| 3059 | YDR245W     | W | MNN10  | 1006  | 1145  | 0 |
| 3060 | YDR246W     | W | TRS23  | 607   | 687   | 0 |
| 3061 | YMR079W     | W | SEC14  | 2738  | 2365  | 0 |
| 3062 | YMR120C     | C | ADE17  | 1529  | 1785  | 0 |
| 3063 | YMR174C     | C | PAI3   | 381   | 685   | 0 |
| 3064 | YMR225C     | C | MRPL44 | 542   | 639   | 0 |
| 3065 | YMR256C     | C | COX7   | 504   | 486   | 0 |
| 3066 | YMR286W     | W | MRPL33 | 505   | 601   | 0 |
| 3067 | YGR098C     | C | ESP1   | 302   | 273   | 0 |

|      |                       |   |        |      |      |   |
|------|-----------------------|---|--------|------|------|---|
| 3068 | YGR281W               | W | YOR1   | 341  | 325  | 0 |
| 3069 | YHL027W               | W | RIM101 | 603  | 702  | 0 |
| 3070 | YHL035C               | C |        | 341  | 347  | 0 |
| 3071 | YHR015W               | W | MIP6   | 238  | 193  | 0 |
| 3072 | YHR027C               | C | RPN1   | 838  | 1038 | 0 |
| 3073 | YML102C- <del>A</del> | C |        | 355  | 374  | 0 |
| 3074 | YMR031W- <del>A</del> | W |        | 400  | 347  | 0 |
| 3075 | YMR050C               | C |        | 3523 | 5166 | 0 |
| 3076 | YMR075C- <del>A</del> | C |        | 367  | 393  | 0 |
| 3077 | YMR119W- <del>A</del> | W |        | 412  | 460  | 0 |
| 3078 | YMR142C               | C | RPL13B | 1981 | 2502 | 0 |
| 3079 | YLR022C               | C |        | 1075 | 1455 | 0 |
| 3080 | YLR121C               | C | YPS3   | 828  | 1025 | 2 |
| 3081 | YLR278C               | C |        | 268  | 225  | 1 |
| 3082 | YLR373C               | C | VID22  | 852  | 797  | 2 |
| 3083 | YLR377C               | C | FBP1   | 315  | 263  | 2 |
| 3084 | YLR442C               | C | SIR3   | 281  | 255  | 1 |
| 3085 | NORF 97               |   |        | 243  | 194  | 0 |
| 3086 | NORF 99               |   |        | 246  | 210  | 1 |
| 3087 | NORF 101              |   |        | 252  | 202  | 1 |
| 3088 | NORF 103              |   |        | 271  | 212  | 0 |
| 3089 | NORF 105              |   |        | 283  | 287  | 0 |
| 3090 | NORF 107              |   |        | 256  | 210  | 1 |
| 3091 | EMPTY                 |   |        | 242  | 212  | 0 |
| 3092 | EMPTY                 |   |        | 237  | 204  | 0 |
| 3093 | EMPTY                 |   |        | 244  | 203  | 0 |
| 3094 | EMPTY                 |   |        | 245  | 200  | 0 |
| 3095 | EMPTY                 |   |        | 286  | 250  | 0 |
| 3096 | EMPTY                 |   |        | 236  | 200  | 0 |
| 3097 | YCL039W               | W |        | 296  | 278  | 1 |
| 3098 | YCR020C               | C | PET18  | 301  | 252  | 1 |
| 3099 | YDL019C               | C | OSH2   | 374  | 371  | 1 |
| 3100 | YDL044C               | C | MTF2   | 519  | 637  | 0 |
| 3101 | YDL093W               | W | PMT5   | 391  | 327  | 1 |
| 3102 | YDL197C               | C | ASF2   | 753  | 750  | 0 |
| 3103 | EMPTY                 |   |        | 259  | 229  | 0 |
| 3104 | EMPTY                 |   |        | 253  | 206  | 0 |
| 3105 | EMPTY                 |   |        | 253  | 205  | 0 |
| 3106 | EMPTY                 |   |        | 249  | 192  | 0 |
| 3107 | EMPTY                 |   |        | 243  | 235  | 0 |
| 3108 | EMPTY                 |   |        | 247  | 202  | 0 |
| 3109 | EMPTY                 |   |        | 242  | 203  | 0 |
| 3110 | EMPTY                 |   |        | 239  | 208  | 0 |
| 3111 | EMPTY                 |   |        | 245  | 197  | 0 |
| 3112 | EMPTY                 |   |        | 244  | 201  | 0 |
| 3113 | EMPTY                 |   |        | 251  | 201  | 0 |
| 3114 | EMPTY                 |   |        | 259  | 197  | 0 |
| 3115 | EMPTY                 |   |        | 252  | 205  | 0 |
| 3116 | EMPTY                 |   |        | 264  | 242  | 0 |
| 3117 | EMPTY                 |   |        | 243  | 200  | 0 |
| 3118 | EMPTY                 |   |        | 251  | 210  | 0 |
| 3119 | EMPTY                 |   |        | 257  | 210  | 0 |

|                |      |     |   |
|----------------|------|-----|---|
| 3120 EMPTY     | 359  | 229 | 0 |
| 3121 CY3 0.1X  | 198  | 172 | 0 |
| 3122 3XSSC     | 293  | 234 | 0 |
| 3123 3XSSC     | 283  | 231 | 0 |
| 3124 CY5 0.1X  | 269  | 221 | 0 |
| 3125 3XSSC     | 268  | 218 | 0 |
| 3126 3XSSC     | 279  | 231 | 0 |
| 3127 EMPTY     | 256  | 212 | 0 |
| 3128 EMPTY     | 247  | 207 | 0 |
| 3129 EMPTY     | 250  | 211 | 0 |
| 3130 EMPTY     | 241  | 202 | 0 |
| 3131 EMPTY     | 246  | 199 | 0 |
| 3132 EMPTY     | 251  | 209 | 0 |
| 3133 EMPTY     | 239  | 205 | 0 |
| 3134 EMPTY     | 247  | 210 | 0 |
| 3135 EMPTY     | 239  | 208 | 0 |
| 3136 EMPTY     | 247  | 206 | 0 |
| 3137 EMPTY     | 247  | 204 | 0 |
| 3138 EMPTY     | 254  | 204 | 0 |
| 3139 EMPTY     | 247  | 211 | 0 |
| 3140 EMPTY     | 255  | 218 | 0 |
| 3141 EMPTY     | 250  | 200 | 0 |
| 3142 EMPTY     | 249  | 214 | 0 |
| 3143 EMPTY     | 311  | 239 | 0 |
| 3144 EMPTY     | 251  | 217 | 0 |
| 3145 CY3 0.1X  | 9564 | 226 | 0 |
| 3146 3XSSC     | 258  | 172 | 0 |
| 3147 3XSSC     | 191  | 166 | 0 |
| 3148 CY5 0.1X  | 349  | 249 | 0 |
| 3149 3XSSC     | 258  | 216 | 0 |
| 3150 3XSSC     | 266  | 215 | 0 |
| 3151 EMPTY     | 378  | 470 | 0 |
| 3152 EMPTY     | 255  | 214 | 0 |
| 3153 EMPTY     | 251  | 205 | 0 |
| 3154 EMPTY     | 246  | 201 | 0 |
| 3155 EMPTY     | 247  | 201 | 0 |
| 3156 EMPTY     | 245  | 204 | 0 |
| 3157 EMPTY     | 248  | 205 | 0 |
| 3158 EMPTY     | 243  | 211 | 0 |
| 3159 EMPTY     | 246  | 200 | 0 |
| 3160 EMPTY     | 261  | 204 | 0 |
| 3161 EMPTY     | 266  | 220 | 0 |
| 3162 EMPTY     | 275  | 248 | 0 |
| 3163 EMPTY     | 247  | 214 | 0 |
| 3164 EMPTY     | 243  | 203 | 0 |
| 3165 EMPTY     | 238  | 210 | 0 |
| 3166 EMPTY     | 252  | 212 | 0 |
| 3167 EMPTY     | 249  | 218 | 0 |
| 3168 EMPTY     | 244  | 202 | 0 |
| 3169 YBR184W W | 419  | 387 | 0 |
| 3170 YBR186W W | 344  | 323 | 0 |
| 3171 YBR188C C | 668  | 795 | 0 |

PCH2  
NTC20

|      |                         |   |        |      |       |   |
|------|-------------------------|---|--------|------|-------|---|
| 3172 | YBR190W                 | W |        | 541  | 485   | 0 |
| 3173 | YBR192W                 | W | RIM2   | 698  | 879   | 0 |
| 3174 | YBR194W                 | W |        | 582  | 601   | 0 |
| 3175 | YBR280C                 | C |        | 542  | 565   | 0 |
| 3176 | YBR282W                 | W | MRPL27 | 869  | 1059  | 0 |
| 3177 | YBR284W                 | W |        | 607  | 725   | 0 |
| 3178 | YBR286W                 | W | APE3   | 6375 | 10157 | 0 |
| 3179 | YBR288C                 | C | APM3   | 1234 | 1363  | 0 |
| 3180 | YBR290W                 | W | BSD2   | 1045 | 1296  | 0 |
| 3181 | YCLX02C                 |   |        | 1537 | 2038  | 0 |
| 3182 | YCLX04W                 |   |        | 801  | 894   | 0 |
| 3183 | YCLX06C                 |   |        | 1889 | 2408  | 0 |
| 3184 | YCL026C- <del>A</del> C |   | FRM2   | 450  | 351   | 0 |
| 3185 | YCLX10C                 |   |        | 738  | 863   | 0 |
| 3186 | YCLX12W                 |   |        | 706  | 623   | 0 |
| 3187 | YCR084C                 | C | TUP1   | 4597 | 4183  | 0 |
| 3188 | YCR086W                 | W | CSM1   | 698  | 816   | 0 |
| 3189 | YCR088W                 | W | ABP1   | 2470 | 4666  | 0 |
| 3190 | YCR090C                 | C |        | 1158 | 1302  | 0 |
| 3191 | YCR092C                 | C | MSH3   | 451  | 510   | 0 |
| 3192 | YCR094W                 | W | CDC50  | 1372 | 1607  | 0 |
| 3193 | YDL051W                 | W | LHP1   | 1326 | 1863  | 0 |
| 3194 | YDL053C                 | C |        | 1149 | 1684  | 0 |
| 3195 | YDL055C                 | C | PSA1   | 3676 | 4241  | 0 |
| 3196 | YDL057W                 | W |        | 637  | 811   | 0 |
| 3197 | YDL059C                 | C | RAD59  | 552  | 658   | 0 |
| 3198 | YDL061C                 | C | RPS29B | 1137 | 1197  | 0 |
| 3199 | YDL147W                 | W | RPN5   | 2275 | 3700  | 0 |
| 3200 | YDL149W                 | W | APG9   | 933  | 1068  | 0 |
| 3201 | YDL151C                 | C | FYV3   | 1091 | 1343  | 0 |
| 3202 | YDL153C                 | C | SAS10  | 2011 | 2689  | 0 |
| 3203 | YDL155W                 | W | CLB3   | 1211 | 1315  | 0 |
| 3204 | YDL157C                 | C |        | 1350 | 1706  | 0 |
| 3205 | YDL243C                 | C | AAD4   | 374  | 306   | 1 |
| 3206 | YDL245C                 | C | HXT15  | 488  | 457   | 0 |
| 3207 | YDL247W                 | W |        | 479  | 438   | 0 |
| 3208 | YDR001C                 | C | NTH1   | 612  | 1283  | 0 |
| 3209 | YDR003W                 | W |        | 818  | 915   | 0 |
| 3210 | YDR005C                 | C | MAF1   | 753  | 889   | 0 |
| 3211 | YDR091C                 | C | RLI1   | 3440 | 2889  | 0 |
| 3212 | YDR093W                 | W | DNF2   | 601  | 546   | 0 |
| 3213 | YDR095C                 | C |        | 1306 | 1103  | 0 |
| 3214 | YDR097C                 | C | MSH6   | 1693 | 1971  | 0 |
| 3215 | YDR099W                 | W | BMH2   | 3399 | 5442  | 0 |
| 3216 | YDR101C                 | C |        | 2985 | 3095  | 0 |
| 3217 | YDR187C                 | C |        | 2050 | 2484  | 0 |
| 3218 | YDR189W                 | W | SLY1   | 1865 | 2390  | 0 |
| 3219 | YDR191W                 | W | HST4   | 479  | 545   | 0 |
| 3220 | YDR193W                 | W |        | 546  | 592   | 0 |
| 3221 | YDR195W                 | W | REF2   | 761  | 849   | 0 |
| 3222 | YDR197W                 | W | CBS2   | 786  | 943   | 0 |
| 3223 | YDR283C                 | C | GCN2   | 376  | 381   | 0 |

|      |          |   |        |      |      |   |
|------|----------|---|--------|------|------|---|
| 3224 | YDR285W  | W | ZIP1   | 400  | 403  | 0 |
| 3225 | YDR287W  | W |        | 736  | 1073 | 0 |
| 3226 | YDR289C  | C | RTT103 | 900  | 1067 | 0 |
| 3227 | YDR291W  | W |        | 485  | 531  | 0 |
| 3228 | YDR293C  | C | SSD1   | 1681 | 2014 | 0 |
| 3229 | YDR379W  | W | RGA2   | 799  | 1054 | 0 |
| 3230 | YDR381W  | W | YRA1   | 2637 | 3136 | 0 |
| 3231 | YDR383C  | C |        | 674  | 717  | 0 |
| 3232 | YDR385W  | W | EFT2   | 8955 | 6214 | 0 |
| 3233 | YDR387C  | C |        | 943  | 884  | 0 |
| 3234 | YDR389W  | W | SAC7   | 759  | 997  | 0 |
| 3235 | YDR475C  | C |        | 566  | 515  | 0 |
| 3236 | YDR477W  | W | SNF1   | 1713 | 1774 | 0 |
| 3237 | YDR479C  | C |        | 985  | 1004 | 0 |
| 3238 | YDR481C  | C | PH08   | 1521 | 2503 | 0 |
| 3239 | YDR483W  | W | KRE2   | 3664 | 4107 | 0 |
| 3240 | YDR485C  | C |        | 879  | 1047 | 0 |
| 3241 | YAL027W  | W |        | 715  | 792  | 0 |
| 3242 | YAL028W  | W |        | 515  | 599  | 0 |
| 3243 | YAL030W  | W | SNC1   | 649  | 1019 | 0 |
| 3244 | YAL032C  | C | PRP45  | 394  | 401  | 0 |
| 3245 | YAL034AW |   |        | 392  | 351  | 0 |
| 3246 | YAL035W  | W | FUN12  | 856  | 1306 | 2 |
| 3247 | YBL016W  | W | FUS3   | 924  | 1868 | 0 |
| 3248 | YBL018C  | C | POP8   | 571  | 663  | 0 |
| 3249 | YBL020W  | W | RFT1   | 620  | 581  | 0 |
| 3250 | YBL022C  | C | PIM1   | 835  | 1203 | 0 |
| 3251 | YBL024W  | W | NCL1   | 2131 | 2759 | 0 |
| 3252 | YBL026W  | W | LSM2   | 750  | 959  | 0 |
| 3253 | YBL110C  |   |        | 1972 | 1798 | 0 |
| 3254 | YBL112C  | C |        | 3315 | 4145 | 0 |
| 3255 | YBR001C  | C | NTH2   | 445  | 604  | 0 |
| 3256 | YBR003W  | W | COQ1   | 238  | 186  | 0 |
| 3257 | YBR005W  | W |        | 488  | 568  | 0 |
| 3258 | YBR007C  | C |        | 430  | 526  | 0 |
| 3259 | YBR090C  | C |        | 936  | 1393 | 0 |
| 3260 | YBR091C  | C | MRS5   | 426  | 460  | 0 |
| 3261 | YBR093C  | C | PH05   | 2618 | 3024 | 0 |
| 3262 | YBR095C  | C |        | 735  | 891  | 0 |
| 3263 | YBR097W  | W | VPS15  | 316  | 235  | 1 |
| 3264 | YBR099C  | C |        | 552  | 475  | 0 |
| 3265 | YEL025C  | C | SRI1   | 267  | 225  | 1 |
| 3266 | YEL027W  | W | CUP5   | 1065 | 1242 | 0 |
| 3267 | YEL029C  | C | BUD16  | 512  | 564  | 0 |
| 3268 | YEL031W  | W | SPF1   | 295  | 216  | 1 |
| 3269 | YEL033W  | W |        | 1085 | 1234 | 0 |
| 3270 | YEL035C  | C | UTR5   | 310  | 246  | 0 |
| 3271 | YER043C  | C | SAH1   | 6381 | 5075 | 0 |
| 3272 | YER044C  | C | ERG28  | 929  | 975  | 0 |
| 3273 | YER046W  | W | SP073  | 542  | 484  | 0 |
| 3274 | YER048C  | C | CAJ1   | 1990 | 3204 | 0 |
| 3275 | YER050C  | C | RSM18  | 822  | 1036 | 0 |

|      |         |   |        |      |       |   |
|------|---------|---|--------|------|-------|---|
| 3276 | YER052C | C | HOM3   | 1886 | 2196  | 0 |
| 3277 | YER136W | W | GDI1   | 2384 | 3719  | 0 |
| 3278 | YER138C | C |        | 6865 | 10560 | 0 |
| 3279 | YER140W | W |        | 816  | 939   | 0 |
| 3280 | YER142C | C | MAG1   | 611  | 929   | 0 |
| 3281 | YER144C | C | UBP5   | 301  | 268   | 1 |
| 3282 | YER146W | W | LSM5   | 1209 | 1526  | 0 |
| 3283 | YFL039C | C | ACT1   | 4838 | 6147  | 0 |
| 3284 | YFL041W | W | FET5   | 1399 | 1472  | 0 |
| 3285 | YFL043C | C |        | 491  | 642   | 0 |
| 3286 | YFL045C | C | SEC53  | 4298 | 3751  | 0 |
| 3287 | YFL047W | W |        | 1213 | 1647  | 0 |
| 3288 | YFL049W | W |        | 828  | 929   | 0 |
| 3289 | YGL009C | C | LEU1   | 1938 | 1827  | 0 |
| 3290 | YGL011C | C | SCL1   | 2170 | 3600  | 0 |
| 3291 | YGL013C | C | PDR1   | 581  | 784   | 0 |
| 3292 | YGL015C | C |        | 511  | 603   | 0 |
| 3293 | YGL017W | W | ATE1   | 653  | 825   | 0 |
| 3294 | YGL019W | W | CKB1   | 1639 | 2140  | 0 |
| 3295 | YGL105W | W | ARC1   | 3647 | 4845  | 0 |
| 3296 | YGL107C | C |        | 834  | 977   | 0 |
| 3297 | YGL109W | W |        | 529  | 707   | 0 |
| 3298 | YGL111W | W | NSA1   | 1775 | 2388  | 0 |
| 3299 | YGL113W | W | SLD3   | 484  | 564   | 0 |
| 3300 | YGL115W | W | SNF4   | 1377 | 1741  | 0 |
| 3301 | YGL201C | C | MCM6   | 500  | 628   | 0 |
| 3302 | YGL203C | C | KEX1   | 1005 | 1321  | 0 |
| 3303 | YGL205W | W | POX1   | 431  | 384   | 0 |
| 3304 | YGL207W | W | SPT16  | 1769 | 2600  | 0 |
| 3305 | YGL209W | W | MIG2   | 965  | 866   | 0 |
| 3306 | YGL211W | W |        | 800  | 1004  | 0 |
| 3307 | YGR034W | W | RPL26B | 2700 | 2840  | 0 |
| 3308 | YGR036C | C | CAX4   | 678  | 702   | 0 |
| 3309 | YGR038W | W | ORM1   | 1078 | 1127  | 0 |
| 3310 | YGR040W | W | KSS1   | 849  | 1062  | 0 |
| 3311 | YGR042W | W |        | 773  | 1138  | 0 |
| 3312 | YGR044C | C | RME1   | 1090 | 1446  | 0 |
| 3313 | YGR130C | C |        | 2852 | 4212  | 0 |
| 3314 | YGR132C | C | PHB1   | 1222 | 2091  | 0 |
| 3315 | YGR134W | W | CAF130 | 430  | 433   | 0 |
| 3316 | YGR136W | W | LSB1   | 1558 | 2677  | 0 |
| 3317 | YGR138C | C |        | 874  | 1172  | 0 |
| 3318 | YGR140W | W | CBF2   | 301  | 213   | 0 |
| 3319 | YGR226C | C |        | 406  | 261   | 0 |
| 3320 | YGR228W | W |        | 2547 | 4325  | 0 |
| 3321 | YGR230W | W | BNS1   | 2560 | 1815  | 0 |
| 3322 | YGR232W | W | NAS6   | 1111 | 1520  | 0 |
| 3323 | YGR234W | W | YHB1   | 4179 | 1086  | 0 |
| 3324 | YGR236C | C | SPG1   | 309  | 301   | 0 |
| 3325 | YHL026C | C |        | 788  | 827   | 0 |
| 3326 | YHL028W | W | WSC4   | 1298 | 924   | 0 |
| 3327 | YHL030W | W | ECM29  | 384  | 433   | 0 |

|      |          |   |        |      |      |   |
|------|----------|---|--------|------|------|---|
| 3328 | YHL032C  | C | GUT1   | 845  | 777  | 0 |
| 3329 | YHL034C  | C | SBP1   | 2171 | 4277 | 0 |
| 3330 | YHL036W  | W | MUP3   | 578  | 632  | 0 |
| 3331 | YHR071W  | W | PCL5   | 1197 | 2468 | 0 |
| 3332 | YHR073W  | W | OSH3   | 1352 | 1627 | 0 |
| 3333 | YHR075C  | C | PPE1   | 264  | 218  | 1 |
| 3334 | YHR077C  | C | NMD2   | 260  | 194  | 1 |
| 3335 | YHR079BC |   |        | 310  | 239  | 0 |
| 3336 | YHR080C  | C |        | 634  | 629  | 0 |
| 3337 | YHR165C  | C | PRP8   | 447  | 595  | 1 |
| 3338 | YHR167W  | W | THP2   | 530  | 586  | 0 |
| 3339 | YHR169W  | W | DBP8   | 1008 | 1586 | 0 |
| 3340 | YHR171W  | W | APG7   | 540  | 452  | 0 |
| 3341 | YHR173C  | C |        | 606  | 496  | 0 |
| 3342 | YHR175W  | W | CTR2   | 1194 | 1072 | 0 |
| 3343 | YIL042C  | C |        | 603  | 469  | 0 |
| 3344 | YIL044C  | C | AGE2   | 1349 | 1639 | 0 |
| 3345 | YIL046W  | W | MET30  | 798  | 1152 | 0 |
| 3346 | YIL048W  | W | NEO1   | 677  | 688  | 0 |
| 3347 | YIL050W  | W | PCL7   | 806  | 915  | 0 |
| 3348 | YIL052C  | C | RPL34B | 3287 | 4263 | 0 |
| 3349 | YIL139C  | C | REV7   | 685  | 849  | 0 |
| 3350 | YIL141W  | W |        | 634  | 548  | 0 |
| 3351 | YIL143C  | C | SSL2   | 1002 | 1266 | 0 |
| 3352 | YIL145C  | C | PAN6   | 1479 | 1563 | 0 |
| 3353 | YIL147C  | C | SLN1   | 774  | 898  | 0 |
| 3354 | YIL149C  | C | MLP2   | 454  | 580  | 0 |
| 3355 | YJL014W  | W | CCT3   | 2189 | 2827 | 0 |
| 3356 | YJL016W  | W |        | 335  | 388  | 0 |
| 3357 | YJL018W  | W |        | 712  | 767  | 0 |
| 3358 | YJL020C  | C | BBC1   | 644  | 1039 | 0 |
| 3359 | YJL022W  | W |        | 487  | 474  | 0 |
| 3360 | YJL024C  | C | APS3   | 674  | 784  | 0 |
| 3361 | YJL111W  | W | CCT7   | 1074 | 1606 | 0 |
| 3362 | YJL113W  | W |        | 252  | 213  | 1 |
| 3363 | YJL115W  | W | ASF1   | 928  | 1611 | 0 |
| 3364 | YJL117W  | W | PH086  | 1787 | 2824 | 0 |
| 3365 | YJL119C  | C |        | 469  | 413  | 0 |
| 3366 | YJL121C  | C | RPE1   | 2584 | 2300 | 0 |
| 3367 | YJL207C  | C |        | 349  | 241  | 1 |
| 3368 | YJL209W  | W | CBP1   | 642  | 751  | 0 |
| 3369 | YJL211C  | C |        | 718  | 661  | 0 |
| 3370 | YJL213W  | W |        | 557  | 746  | 0 |
| 3371 | YJL215C  | C |        | 345  | 297  | 0 |
| 3372 | YJL217W  | W |        | 1047 | 2369 | 0 |
| 3373 | YJR078W  | W |        | 362  | 331  | 0 |
| 3374 | YJR080C  | C |        | 779  | 1070 | 0 |
| 3375 | YJR083C  | C |        | 642  | 682  | 0 |
| 3376 | YJR085C  | C |        | 1020 | 1668 | 0 |
| 3377 | YJR087W  | W |        | 1149 | 1836 | 0 |
| 3378 | YJR089W  | W | BIR1   | 612  | 868  | 0 |
| 3379 | YKL012W  | W | PRP40  | 858  | 1180 | 0 |

|      |         |   |        |      |      |   |
|------|---------|---|--------|------|------|---|
| 3380 | YKL014C | C |        | 332  | 249  | 2 |
| 3381 | YKL016C | C | ATP7   | 1000 | 1117 | 0 |
| 3382 | YKL018W | W | SWD2   | 984  | 1077 | 0 |
| 3383 | YKL020C | C | SPT23  | 473  | 528  | 0 |
| 3384 | YKL022C | C | CDC16  | 624  | 758  | 0 |
| 3385 | YKL107W | W |        | 332  | 297  | 0 |
| 3386 | YKL109W | W | HAP4   | 698  | 431  | 0 |
| 3387 | YKL111C | C |        | 996  | 983  | 0 |
| 3388 | YKL113C | C | RAD27  | 1175 | 1589 | 0 |
| 3389 | YKL115C | C |        | 433  | 393  | 0 |
| 3390 | YKL117W | W | SBA1   | 2818 | 5550 | 0 |
| 3391 | YKL203C | C | TOR2   | 286  | 266  | 1 |
| 3392 | YKL205W | W | LOS1   | 643  | 792  | 0 |
| 3393 | YKL207W | W |        | 2144 | 2340 | 0 |
| 3394 | YKL209C | C | STE6   | 2525 | 3460 | 0 |
| 3395 | YKL211C | C | TRP3   | 1634 | 1874 | 0 |
| 3396 | YKL213C | C | DOA1   | 347  | 368  | 0 |
| 3397 | YKR074W | W |        | 963  | 1304 | 0 |
| 3398 | YKR076W | W | ECM4   | 499  | 1190 | 0 |
| 3399 | YKR078W | W |        | 552  | 718  | 0 |
| 3400 | YKR080W | W | MTD1   | 960  | 1757 | 0 |
| 3401 | YKR082W | W | NUP133 | 676  | 775  | 0 |
| 3402 | YKR084C | C | HBS1   | 1144 | 1621 | 0 |
| 3403 | YLL064C | C |        | 826  | 721  | 0 |
| 3404 | YLL066C | C |        | 1661 | 2019 | 0 |
| 3405 | YLR001C | C |        | 677  | 870  | 0 |
| 3406 | YLR003C | C |        | 1350 | 1860 | 0 |
| 3407 | YLR005W | W | SSL1   | 847  | 1021 | 0 |
| 3408 | YLR007W | W |        | 856  | 1080 | 0 |
| 3409 | YLR093C | C | NYV1   | 1044 | 1419 | 0 |
| 3410 | YLR095C | C | IOC2   | 817  | 1071 | 0 |
| 3411 | YLR097C | C |        | 609  | 762  | 0 |
| 3412 | YLR099C | C | ICT1   | 597  | 616  | 0 |
| 3413 | YLR101C | C |        | 1221 | 1628 | 0 |
| 3414 | YLR103C | C | CDC45  | 408  | 474  | 0 |
| 3415 | YLR189C | C | UGT51  | 688  | 843  | 0 |
| 3416 | YLR191W | W | PEX13  | 600  | 744  | 0 |
| 3417 | YLR193C | C |        | 653  | 763  | 0 |
| 3418 | YLR195C | C | NMT1   | 1499 | 1851 | 0 |
| 3419 | YLR197W | W | SIK1   | 6229 | 6329 | 0 |
| 3420 | YLR199C | C |        | 885  | 1126 | 0 |
| 3421 | YLR285W | W |        | 1295 | 1666 | 0 |
| 3422 | YLR287C | C |        | 1092 | 1747 | 0 |
| 3423 | YLR289W | W | GUF1   | 482  | 541  | 0 |
| 3424 | YLR291C | C | GCD7   | 2031 | 2335 | 0 |
| 3425 | YLR293C | C | GSP1   | 5568 | 6294 | 0 |
| 3426 | YLR295C | C | ATP14  | 1070 | 1229 | 0 |
| 3427 | YLR381W | W |        | 334  | 235  | 1 |
| 3428 | YLR383W | W | RHC18  | 575  | 768  | 0 |
| 3429 | YLR385C | C |        | 691  | 629  | 0 |
| 3430 | YLR387C | C |        | 979  | 1415 | 0 |
| 3431 | YLR389C | C | STE23  | 1293 | 1214 | 0 |

|      |         |   |        |      |      |   |
|------|---------|---|--------|------|------|---|
| 3432 | YLR391W |   | 3766   | 4326 | 0    |   |
| 3433 | YML011C | C | 629    | 689  | 0    |   |
| 3434 | YML013W | W | 862    | 963  | 0    |   |
| 3435 | YML015C | C | TAF40  | 698  | 932  | 0 |
| 3436 | YML018C | C | 2617   | 2454 | 0    |   |
| 3437 | YML020W | W | 283    | 255  | 1    |   |
| 3438 | YML022W | W | APT1   | 2321 | 2197 | 0 |
| 3439 | YML121W | W | GTR1   | 864  | 1282 | 0 |
| 3440 | YML123C | C | PH084  | 2359 | 7980 | 0 |
| 3441 | YML126C | C | ERG13  | 4551 | 4426 | 0 |
| 3442 | YML128C | C | MSC1   | 624  | 3608 | 0 |
| 3443 | YML130C | C | ER01   | 1744 | 2196 | 2 |
| 3444 | YML132W | W | COS3   | 3134 | 3511 | 0 |
| 3445 | YMR095C | C | SN01   | 525  | 530  | 0 |
| 3446 | YMR097C | C |        | 718  | 920  | 0 |
| 3447 | YMR099C | C |        | 2043 | 3160 | 0 |
| 3448 | YMR101C | C | SRT1   | 326  | 327  | 1 |
| 3449 | YMR103C | C |        | 310  | 318  | 1 |
| 3450 | YMR105C | C | PGM2   | 1609 | 3189 | 0 |
| 3451 | YMR202W | W | ERG2   | 2400 | 2715 | 0 |
| 3452 | YMR204C | C |        | 577  | 502  | 0 |
| 3453 | YMR206W | W |        | 553  | 523  | 0 |
| 3454 | YMR208W | W | ERG12  | 1494 | 1508 | 0 |
| 3455 | YMR210W | W |        | 770  | 757  | 0 |
| 3456 | YMR212C | C | EFR3   | 1467 | 1453 | 0 |
| 3457 | YMR307W | W | GAS1   | 7217 | 5908 | 0 |
| 3458 | YMR309C | C | NIP1   | 3341 | 3276 | 0 |
| 3459 | YMR311C | C | GLC8   | 1543 | 2273 | 0 |
| 3460 | YMR313C | C |        | 547  | 706  | 1 |
| 3461 | YMR315W | W |        | 1845 | 4151 | 0 |
| 3462 | YMR317W | W |        | 495  | 459  | 0 |
| 3463 | YNL078W | W | JIP1   | 1372 | 2042 | 0 |
| 3464 | YNL080C | C |        | 1819 | 1764 | 0 |
| 3465 | YNL082W | W | PMS1   | 673  | 810  | 0 |
| 3466 | YNL084C | C | END3   | 1305 | 1793 | 0 |
| 3467 | YNL086W | W |        | 506  | 487  | 0 |
| 3468 | YNL088W | W | TOP2   | 463  | 441  | 1 |
| 3469 | YNL174W | W |        | 1967 | 2336 | 0 |
| 3470 | YNL176C | C |        | 1139 | 1017 | 0 |
| 3471 | YNL178W | W | RPS3   | 7726 | 7542 | 0 |
| 3472 | YNL180C | C | RH05   | 1571 | 2989 | 0 |
| 3473 | YNL182C | C |        | 906  | 1313 | 0 |
| 3474 | YNL184C | C |        | 583  | 612  | 0 |
| 3475 | YNL270C | C | ALP1   | 430  | 372  | 0 |
| 3476 | YNL272C | C | SEC2   | 969  | 1121 | 0 |
| 3477 | YNL274C | C |        | 741  | 1344 | 0 |
| 3478 | YNL276C | C |        | 475  | 520  | 0 |
| 3479 | YNL278W | W | CAF120 | 625  | 640  | 0 |
| 3480 | YNL280C | C | ERG24  | 986  | 1302 | 0 |
| 3481 | YNR027W | W | BUD17  | 675  | 863  | 0 |
| 3482 | YNR029C | C |        | 605  | 671  | 0 |
| 3483 | YNR031C | C | SSK2   | 301  | 268  | 1 |

|      |         |   |        |      |      |   |
|------|---------|---|--------|------|------|---|
| 3484 | YNR033W | W | ABZ1   | 406  | 443  | 0 |
| 3485 | YNR035C | C | ARC35  | 1251 | 1884 | 0 |
| 3486 | YNR037C | C | RSM19  | 519  | 818  | 0 |
| 3487 | YOL046C | C |        | 744  | 644  | 0 |
| 3488 | YOL048C | C |        | 511  | 457  | 0 |
| 3489 | YOL050C | C |        | 780  | 907  | 0 |
| 3490 | YOL052C | C | SPE2   | 1434 | 1509 | 0 |
| 3491 | YOL053W | W |        | 452  | 479  | 0 |
| 3492 | YOL055C | C | THI20  | 677  | 867  | 0 |
| 3493 | YOL141W | W | PPM2   | 537  | 609  | 0 |
| 3494 | YOL143C | C | RIB4   | 3622 | 3102 | 0 |
| 3495 | YOL145C | C | CTR9   | 847  | 1109 | 0 |
| 3496 | YOL147C | C | PEX11  | 852  | 750  | 0 |
| 3497 | YOL149W | W | DCP1   | 1071 | 1271 | 0 |
| 3498 | YOL151W | W | GRE2   | 2273 | 1815 | 0 |
| 3499 | YOR071C | C |        | 1523 | 1775 | 0 |
| 3500 | YOR073W | W |        | 987  | 901  | 0 |
| 3501 | YOR075W | W | UFE1   | 758  | 882  | 0 |
| 3502 | YOR077W | W | RTS2   | 595  | 578  | 0 |
| 3503 | YOR079C | C | ATX2   | 733  | 671  | 0 |
| 3504 | YOR081C | C |        | 1250 | 1063 | 0 |
| 3505 | YOR167C | C | RPS28A | 1410 | 1479 | 0 |
| 3506 | YOR169C | C |        | 2073 | 2438 | 0 |
| 3507 | YOR171C | C | LCB4   | 1151 | 1259 | 0 |
| 3508 | YOR173W | W |        | 246  | 200  | 1 |
| 3509 | YOR175C | C |        | 1365 | 1192 | 0 |
| 3510 | YOR177C | C | MPC54  | 380  | 343  | 0 |
| 3511 | YOR263C | C |        | 826  | 953  | 0 |
| 3512 | YOR265W | W | RBL2   | 925  | 1200 | 0 |
| 3513 | YOR267C | C |        | 1403 | 1449 | 0 |
| 3514 | YOR269W | W | PAC1   | 744  | 742  | 0 |
| 3515 | YOR271C | C |        | 1816 | 1883 | 0 |
| 3516 | YOR273C | C |        | 671  | 374  | 0 |
| 3517 | YOR359W | W |        | 264  | 243  | 1 |
| 3518 | YOR361C | C | PRT1   | 392  | 376  | 1 |
| 3519 | YOR363C | C | PIP2   | 265  | 198  | 1 |
| 3520 | YOR365C | C |        | 303  | 254  | 0 |
| 3521 | YOR367W | W | SCP1   | 785  | 1080 | 0 |
| 3522 | YOR369C | C | RPS12  | 3519 | 3458 | 0 |
| 3523 | YPL061W | W | ALD6   | 3767 | 7429 | 0 |
| 3524 | YPL063W | W |        | 1282 | 1875 | 0 |
| 3525 | YPL065W | W | VPS28  | 540  | 623  | 0 |
| 3526 | YPL067C | C |        | 594  | 553  | 0 |
| 3527 | YPL069C | C | BTS1   | 694  | 676  | 0 |
| 3528 | YPL071C | C |        | 519  | 594  | 0 |
| 3529 | YPL157W | W |        | 450  | 545  | 0 |
| 3530 | YPL159C | C |        | 1067 | 1060 | 0 |
| 3531 | YPL161C | C | BEM4   | 243  | 196  | 1 |
| 3532 | YPL163C | C | SVS1   | 2301 | 2294 | 0 |
| 3533 | YPL165C | C | SET6   | 525  | 429  | 0 |
| 3534 | YPL167C | C | REV3   | 276  | 184  | 1 |
| 3535 | YPL253C | C | VIK1   | 698  | 679  | 0 |

|      |           |   |         |      |      |   |
|------|-----------|---|---------|------|------|---|
| 3536 | YPL255W   | W | BBP1    | 736  | 795  | 0 |
| 3537 | YPL257W   | W |         | 430  | 362  | 0 |
| 3538 | YPL259C   | C | APM1    | 977  | 1075 | 0 |
| 3539 | YPL261C   | C |         | 465  | 441  | 0 |
| 3540 | YPL263C   | C | KEL3    | 1108 | 1516 | 0 |
| 3541 | YPR066W   | W | UBA3    | 472  | 435  | 0 |
| 3542 | YPR068C   | C | HOS1    | 250  | 191  | 1 |
| 3543 | YPR070W   | W | MED1    | 252  | 181  | 1 |
| 3544 | YPR072W   | W | NOT5    | 1184 | 1728 | 0 |
| 3545 | YPR074C   | C | TKL1    | 7035 | 5472 | 0 |
| 3546 | YPR076W   | W |         | 723  | 711  | 0 |
| 3547 | YPR162C   | C | ORC4    | 758  | 836  | 0 |
| 3548 | YPR164W   | W | MMS1    | 323  | 235  | 1 |
| 3549 | YPR166C   | C | MRP2    | 674  | 697  | 0 |
| 3550 | YPR168W   | W | NUT2    | 326  | 332  | 1 |
| 3551 | YPR170C   | C |         | 612  | 586  | 0 |
| 3552 | YPR172W   | W |         | 877  | 1136 | 0 |
| 3553 | NORF 27   |   |         | 279  | 207  | 0 |
| 3554 | NORF 31   |   |         | 492  | 513  | 0 |
| 3555 | NORF 35   |   |         | 726  | 849  | 0 |
| 3556 | NORF 39   |   |         | 2788 | 2751 | 0 |
| 3557 | NORF 43   |   |         | 1309 | 1057 | 0 |
| 3558 | NORF 47   |   |         | 448  | 410  | 0 |
| 3559 | YBR208C   | C | DUR1, 2 | 325  | 296  | 1 |
| 3560 | YBR224W   | W |         | 370  | 304  | 0 |
| 3561 | YBR286W   | W | APE3    | 5055 | 8026 | 0 |
| 3562 | YCL029C   | C | BIK1    | 534  | 662  | 0 |
| 3563 | YCL045C   | C |         | 1955 | 2032 | 0 |
| 3564 | YCL061C   | C | MRC1    | 713  | 869  | 0 |
| 3565 | YGL071W   | W | RCS1    | 1286 | 1662 | 0 |
| 3566 | YGL126W   | W | SCS3    | 325  | 256  | 1 |
| 3567 | YGL226W   | W |         | 461  | 475  | 2 |
| 3568 | YGR017W   | W |         | 962  | 1178 | 0 |
| 3569 | YGR062C   | C | COX18   | 314  | 291  | 0 |
| 3570 | YGR150C   | C |         | 452  | 539  | 0 |
| 3571 | YLR279W   | W |         | 296  | 222  | 0 |
| 3572 | YLR281C   | C |         | 294  | 210  | 0 |
| 3573 | YLR406C   | C | RPL31B  | 297  | 254  | 1 |
| 3574 | YLR451W   | W | LEU3    | 747  | 797  | 0 |
| 3575 | YLR464W   | W |         | 1661 | 1391 | 2 |
| 3576 | YML066C   | C | SMA2    | 583  | 575  | 0 |
| 3577 | YPL235W   | W | RVB2    | 1623 | 2125 | 2 |
| 3578 | YPL248C   | C | GAL4    | 311  | 254  | 0 |
| 3579 | YPL283C   | C | YRF1-7  | 390  | 337  | 1 |
| 3580 | YPR041W   | W | TIF5    | 2683 | 3264 | 1 |
| 3581 | YPR065W   | W | ROX1    | 922  | 1128 | 1 |
| 3582 | YPR069C   | C | SPE3    | 2850 | 3569 | 0 |
| 3583 | YAR075W   | W |         | 3383 | 2489 | 0 |
| 3584 | YDL134C-A |   |         | 588  | 679  | 1 |
| 3585 | YDR236C   | C | FMN1    | 727  | 763  | 0 |
| 3586 | YDR238C   | C | SEC26   | 669  | 704  | 1 |
| 3587 | YMR060C   | C | TOM37   | 743  | 832  | 0 |

|      |                         |   |        |       |       |   |
|------|-------------------------|---|--------|-------|-------|---|
| 3588 | YMR062C                 | C | ECM40  | 1201  | 1209  | 0 |
| 3589 | YML017W                 | W | PSP2   | 290   | 224   | 1 |
| 3590 | YML052W                 | W | SUR7   | 2334  | 2026  | 0 |
| 3591 | YML085C                 | C | TUB1   | 2670  | 2508  | 0 |
| 3592 | YML094W                 | W | GIM5   | 852   | 990   | 0 |
| 3593 | YMR033W                 | W | ARP9   | 1553  | 1642  | 0 |
| 3594 | YMR062C                 | C | ECM40  | 940   | 1029  | 0 |
| 3595 | YFL024C                 | C | EPL1   | 480   | 619   | 0 |
| 3596 | YGL062W                 | W | PYC1   | 669   | 1277  | 0 |
| 3597 | YGL140C                 | C |        | 545   | 575   | 0 |
| 3598 | YGL215W                 | W | CLG1   | 1006  | 1215  | 2 |
| 3599 | YGR032W                 | W | GSC2   | 864   | 783   | 0 |
| 3600 | YGR097W                 | W | ASK10  | 334   | 384   | 0 |
| 3601 | YML024W                 | W | RPS17A | 1022  | 1088  | 0 |
| 3602 | YML026C                 | C | RPS18B | 1664  | 1906  | 0 |
| 3603 | YML035C- <del>A</del> C |   |        | 433   | 385   | 0 |
| 3604 | YML048W- <del>A</del> W |   |        | 415   | 388   | 0 |
| 3605 | YML067C                 | C | ERV41  | 598   | 678   | 0 |
| 3606 | YML100W- <del>A</del> W |   |        | 327   | 341   | 0 |
| 3607 | YKR030W                 | W |        | 952   | 881   | 0 |
| 3608 | YKR043C                 | C |        | 1869  | 1832  | 0 |
| 3609 | YKR093W                 | W | PTR2   | 2578  | 3063  | 1 |
| 3610 | YLL015W                 | W | BPT1   | 455   | 473   | 1 |
| 3611 | YLL019C                 | C | KNS1   | 615   | 748   | 0 |
| 3612 | YLL039C                 | C | UBI4   | 841   | 1893  | 2 |
| 3613 | YPL268W                 | W | PLC1   | 460   | 563   | 0 |
| 3614 | YPL273W                 | W | SAM4   | 23959 | 25923 | 0 |
| 3615 | YPR030W                 | W | CSR2   | 340   | 357   | 0 |
| 3616 | YPR062W                 | W | FCY1   | 2054  | 2508  | 0 |
| 3617 | YPR136C                 | C | FYV15  | 929   | 1262  | 0 |
| 3618 | NORF 108                |   |        | 802   | 1570  | 0 |
| 3619 | EMPTY                   |   |        | 246   | 194   | 0 |
| 3620 | EMPTY                   |   |        | 226   | 170   | 0 |
| 3621 | EMPTY                   |   |        | 247   | 174   | 0 |
| 3622 | EMPTY                   |   |        | 236   | 176   | 0 |
| 3623 | EMPTY                   |   |        | 255   | 174   | 0 |
| 3624 | EMPTY                   |   |        | 262   | 185   | 0 |
| 3625 | YBR123C                 | C | TFC1   | 635   | 650   | 0 |
| 3626 | YBR130C                 | C | SHE3   | 1158  | 1397  | 2 |
| 3627 | YBR177C                 | C | EHT1   | 976   | 822   | 0 |
| 3628 | YBR226C                 | C |        | 275   | 208   | 1 |
| 3629 | YBR289W                 | W | SNF5   | 579   | 618   | 0 |
| 3630 | YCL001W                 | W | RER1   | 251   | 193   | 1 |
| 3631 | EMPTY                   |   |        | 256   | 182   | 0 |
| 3632 | EMPTY                   |   |        | 236   | 183   | 0 |
| 3633 | EMPTY                   |   |        | 246   | 189   | 0 |
| 3634 | EMPTY                   |   |        | 260   | 192   | 0 |
| 3635 | EMPTY                   |   |        | 259   | 199   | 0 |
| 3636 | EMPTY                   |   |        | 247   | 192   | 0 |
| 3637 | EMPTY                   |   |        | 274   | 192   | 0 |
| 3638 | EMPTY                   |   |        | 254   | 183   | 0 |
| 3639 | EMPTY                   |   |        | 246   | 191   | 0 |

|                |      |     |   |
|----------------|------|-----|---|
| 3640 EMPTY     | 258  | 270 | 0 |
| 3641 EMPTY     | 249  | 174 | 0 |
| 3642 EMPTY     | 242  | 170 | 0 |
| 3643 EMPTY     | 238  | 178 | 0 |
| 3644 EMPTY     | 237  | 174 | 0 |
| 3645 EMPTY     | 241  | 174 | 0 |
| 3646 EMPTY     | 239  | 167 | 0 |
| 3647 EMPTY     | 225  | 163 | 0 |
| 3648 EMPTY     | 249  | 170 | 0 |
| 3649 CY3 0. 1X | 725  | 411 | 0 |
| 3650 3XSSC     | 232  | 196 | 0 |
| 3651 3XSSC     | 233  | 184 | 0 |
| 3652 CY5 0. 1X | 246  | 175 | 0 |
| 3653 3XSSC     | 258  | 176 | 0 |
| 3654 3XSSC     | 242  | 176 | 0 |
| 3655 EMPTY     | 256  | 193 | 0 |
| 3656 EMPTY     | 239  | 188 | 0 |
| 3657 EMPTY     | 247  | 184 | 0 |
| 3658 EMPTY     | 249  | 192 | 0 |
| 3659 EMPTY     | 247  | 203 | 0 |
| 3660 EMPTY     | 257  | 191 | 0 |
| 3661 EMPTY     | 262  | 189 | 0 |
| 3662 EMPTY     | 252  | 190 | 0 |
| 3663 EMPTY     | 248  | 177 | 0 |
| 3664 EMPTY     | 251  | 176 | 0 |
| 3665 EMPTY     | 244  | 181 | 0 |
| 3666 EMPTY     | 240  | 175 | 0 |
| 3667 EMPTY     | 234  | 171 | 0 |
| 3668 EMPTY     | 241  | 171 | 0 |
| 3669 EMPTY     | 239  | 175 | 0 |
| 3670 EMPTY     | 256  | 187 | 0 |
| 3671 EMPTY     | 236  | 171 | 0 |
| 3672 EMPTY     | 240  | 173 | 0 |
| 3673 CY3 0. 1X | 4332 | 191 | 0 |
| 3674 3XSSC     | 260  | 193 | 0 |
| 3675 3XSSC     | 239  | 187 | 0 |
| 3676 CY5 0. 1X | 340  | 193 | 0 |
| 3677 3XSSC     | 268  | 184 | 0 |
| 3678 3XSSC     | 246  | 189 | 0 |
| 3679 EMPTY     | 248  | 186 | 0 |
| 3680 EMPTY     | 238  | 182 | 0 |
| 3681 EMPTY     | 237  | 187 | 0 |
| 3682 EMPTY     | 245  | 191 | 0 |
| 3683 EMPTY     | 254  | 207 | 0 |
| 3684 EMPTY     | 256  | 187 | 0 |
| 3685 EMPTY     | 256  | 187 | 0 |
| 3686 EMPTY     | 250  | 185 | 0 |
| 3687 EMPTY     | 244  | 177 | 0 |
| 3688 EMPTY     | 252  | 186 | 0 |
| 3689 EMPTY     | 248  | 179 | 0 |
| 3690 EMPTY     | 247  | 173 | 0 |
| 3691 EMPTY     | 238  | 184 | 0 |

|      |         |   |       |      |      |   |
|------|---------|---|-------|------|------|---|
| 3692 | EMPTY   |   | 243   | 174  | 0    |   |
| 3693 | EMPTY   |   | 244   | 177  | 0    |   |
| 3694 | EMPTY   |   | 254   | 184  | 0    |   |
| 3695 | EMPTY   |   | 243   | 176  | 0    |   |
| 3696 | EMPTY   |   | 297   | 229  | 0    |   |
| 3697 | YBR196C | C | PGI1  | 4031 | 4585 | 0 |
| 3698 | YBR198C | C | TAF90 | 823  | 1104 | 0 |
| 3699 | YBR200W | W | BEM1  | 883  | 1226 | 0 |
| 3700 | YBR202W | W | CDC47 | 583  | 659  | 0 |
| 3701 | YBR204C | C |       | 612  | 698  | 0 |
| 3702 | YBR206W | W |       | 993  | 1177 | 0 |
| 3703 | YBR292C | C |       | 378  | 322  | 0 |
| 3704 | YBR294W | W | SUL1  | 379  | 324  | 0 |
| 3705 | YBR296C | C | PHO89 | 291  | 240  | 0 |
| 3706 | YBR298C | C | MAL31 | 349  | 230  | 0 |
| 3707 | YBR300C | C |       | 382  | 274  | 0 |
| 3708 | YBR302C | C | COS2  | 841  | 1052 | 0 |
| 3709 | YCR002C | C | CDC10 | 1578 | 1761 | 0 |
| 3710 | YCR004C | C | YCP4  | 2034 | 4191 | 0 |
| 3711 | YCR006C | C |       | 358  | 300  | 0 |
| 3712 | YCR008W | W | SAT4  | 1238 | 1633 | 0 |
| 3713 | YCR010C | C | ADY2  | 478  | 427  | 0 |
| 3714 | YCR012W | W | PGK1  | 2614 | 4233 | 0 |
| 3715 | YCR096C | C | HMRA2 | 827  | 1058 | 0 |
| 3716 | YCR097W | W | HMRA1 | 1028 | 1352 | 0 |
| 3717 | YCR099C | C |       | 548  | 492  | 0 |
| 3718 | YCR101C | C |       | 513  | 383  | 0 |
| 3719 | YCR103C |   |       | 634  | 506  | 0 |
| 3720 | YCR105W | W |       | 495  | 452  | 0 |
| 3721 | YDL063C | C |       | 399  | 452  | 0 |
| 3722 | YDL065C | C | PEX19 | 332  | 297  | 0 |
| 3723 | YDL067C | C | COX9  | 875  | 843  | 0 |
| 3724 | YDL069C | C | CBS1  | 408  | 361  | 0 |
| 3725 | YDL071C | C |       | 512  | 489  | 0 |
| 3726 | YDL073W | W |       | 386  | 367  | 1 |
| 3727 | YDL159W | W | STE7  | 726  | 785  | 0 |
| 3728 | YDL161W | W | ENT1  | 1385 | 1953 | 0 |
| 3729 | YDL163W | W |       | 759  | 663  | 0 |
| 3730 | YDL165W | W | CDC36 | 585  | 720  | 0 |
| 3731 | YDL167C | C | NRP1  | 1112 | 1593 | 0 |
| 3732 | YDL169C | C | UGX2  | 478  | 465  | 0 |
| 3733 | YDR007W | W | TRP1  | 658  | 921  | 0 |
| 3734 | YDR009W | W | GAL3  | 289  | 230  | 0 |
| 3735 | YDR011W | W | SNQ2  | 283  | 226  | 1 |
| 3736 | YDR013W | W |       | 485  | 482  | 0 |
| 3737 | YDR015C | C |       | 265  | 185  | 0 |
| 3738 | YDR017C | C | KCS1  | 404  | 295  | 1 |
| 3739 | YDR103W | W | STE5  | 1387 | 1538 | 0 |
| 3740 | YDR105C | C |       | 1429 | 1381 | 0 |
| 3741 | YDR107C | C |       | 723  | 778  | 0 |
| 3742 | YDR109C | C |       | 930  | 1116 | 0 |
| 3743 | YDR111C | C |       | 1004 | 651  | 0 |

|      |                         |   |        |      |       |   |
|------|-------------------------|---|--------|------|-------|---|
| 3744 | YDR113C                 | C | PDS1   | 942  | 890   | 0 |
| 3745 | YDR199W                 | W |        | 804  | 887   | 0 |
| 3746 | YDR201W                 | W | SPC19  | 764  | 821   | 0 |
| 3747 | YDR203W                 | W |        | 568  | 653   | 0 |
| 3748 | YDR205W                 | W | MSC2   | 968  | 983   | 0 |
| 3749 | YDR207C                 | C | UME6   | 764  | 987   | 0 |
| 3750 | YDR209C                 | C |        | 1534 | 1781  | 0 |
| 3751 | YDR295C                 | C | PL02   | 331  | 309   | 1 |
| 3752 | YDR297W                 | W | SUR2   | 1787 | 1550  | 0 |
| 3753 | YDR299W                 | W | BFR2   | 1300 | 2131  | 0 |
| 3754 | YDR301W                 | W | CFT1   | 444  | 441   | 0 |
| 3755 | YDR303C                 | C | RSC3   | 644  | 686   | 0 |
| 3756 | YDR305C                 | C | HNT2   | 2585 | 1710  | 0 |
| 3757 | YDR391C                 | C |        | 775  | 957   | 0 |
| 3758 | YDR393W                 | W | SHE9   | 1414 | 1287  | 0 |
| 3759 | YDR395W                 | W | SXM1   | 2037 | 2353  | 0 |
| 3760 | YDR397C                 | C | NCB2   | 1140 | 1503  | 0 |
| 3761 | YDR399W                 | W | HPT1   | 1775 | 1472  | 0 |
| 3762 | YDR401W                 | W |        | 372  | 295   | 0 |
| 3763 | YDR487C                 | C | RIB3   | 1645 | 1912  | 0 |
| 3764 | YDR489W                 | W |        | 688  | 741   | 0 |
| 3765 | YDR491C                 | C |        | 801  | 854   | 0 |
| 3766 | YDR493W                 | W |        | 588  | 628   | 0 |
| 3767 | YDR495C                 | C | VPS3   | 494  | 586   | 0 |
| 3768 | YDR497C                 | C | ITR1   | 2041 | 2243  | 0 |
| 3769 | YAL037W                 | W |        | 289  | 246   | 0 |
| 3770 | YAL039C                 | C | CYC3   | 419  | 461   | 0 |
| 3771 | YAL041W                 | W | CDC24  | 352  | 356   | 0 |
| 3772 | YAL043C                 | C | PTA1   | 286  | 249   | 0 |
| 3773 | YAL045C                 | C |        | 467  | 646   | 0 |
| 3774 | YAL047C                 | C | SPC72  | 307  | 291   | 0 |
| 3775 | YBL028C                 | C |        | 1291 | 1791  | 0 |
| 3776 | YBL030C                 | C | PET9   | 4464 | 5356  | 0 |
| 3777 | YBL032W                 | W |        | 1756 | 1552  | 0 |
| 3778 | YBL034C                 | C | STU1   | 260  | 199   | 1 |
| 3779 | YBL036C                 | C |        | 1283 | 1822  | 0 |
| 3780 | YBL038W                 | W | MRPL16 | 674  | 700   | 0 |
| 3781 | YBR009C                 | C | HHF1   | 2645 | 2262  | 0 |
| 3782 | YBR011C                 | C | IPP1   | 3937 | 5325  | 0 |
| 3783 | YBR012W- <sup>A</sup> W |   |        | 7035 | 10230 | 0 |
| 3784 | YBR013C                 | C |        | 409  | 404   | 0 |
| 3785 | YBR015C                 | C | MNN2   | 1345 | 1520  | 0 |
| 3786 | YBR017C                 | C | KAP104 | 510  | 721   | 0 |
| 3787 | YBR101C                 | C |        | 1017 | 1199  | 0 |
| 3788 | YBR103W                 | W | SIF2   | 591  | 739   | 0 |
| 3789 | YBR105C                 | C | VID24  | 697  | 931   | 0 |
| 3790 | YBR107C                 | C | IML3   | 551  | 544   | 0 |
| 3791 | YBR109C                 | C | CMD1   | 1720 | 2442  | 0 |
| 3792 | YBR111C                 | C | YSA1   | 1200 | 2346  | 0 |
| 3793 | YEL037C                 | C | RAD23  | 1189 | 1974  | 0 |
| 3794 | YEL039C                 | C | CYC7   | 390  | 357   | 0 |
| 3795 | YEL041W                 | W |        | 281  | 236   | 0 |

|      |          |   |        |      |      |   |
|------|----------|---|--------|------|------|---|
| 3796 | YEL043W  | W |        | 368  | 353  | 0 |
| 3797 | YEL045C  | C |        | 352  | 286  | 0 |
| 3798 | YEL047C  | C |        | 1148 | 1093 | 0 |
| 3799 | YER054C  | C | GIP2   | 277  | 240  | 1 |
| 3800 | YER0561C |   |        | 3133 | 3926 | 0 |
| 3801 | YER057C  | C | HMF1   | 1664 | 1929 | 0 |
| 3802 | YER059W  | W | PCL6   | 824  | 835  | 0 |
| 3803 | YER061C  | C | CEM1   | 671  | 805  | 0 |
| 3804 | YER063W  | W | TH01   | 1767 | 2043 | 0 |
| 3805 | YER148W  | W | SPT15  | 1804 | 2497 | 0 |
| 3806 | YER150W  | W | SPI1   | 678  | 2065 | 0 |
| 3807 | YER152C  | C |        | 858  | 1157 | 0 |
| 3808 | YER154W  | W | OXA1   | 1291 | 1703 | 0 |
| 3809 | YER156C  | C |        | 1854 | 1725 | 0 |
| 3810 | YER158C  | C |        | 736  | 780  | 0 |
| 3811 | YFL051C  | C |        | 356  | 258  | 0 |
| 3812 | YFL053W  | W | DAK2   | 391  | 304  | 0 |
| 3813 | YFL055W  | W | AGP3   | 403  | 356  | 0 |
| 3814 | YFL057C  | C |        | 323  | 282  | 1 |
| 3815 | YFL059W  | W | SNZ3   | 600  | 587  | 0 |
| 3816 | YFL061W  | W |        | 503  | 438  | 0 |
| 3817 | YGL021W  | W | ALK1   | 1284 | 1169 | 0 |
| 3818 | YGL023C  | C | PIB2   | 792  | 1152 | 0 |
| 3819 | YGL025C  | C | PGD1   | 762  | 885  | 0 |
| 3820 | YGL027C  | C | CWH41  | 1491 | 1785 | 0 |
| 3821 | YGL029W  | W | CGR1   | 1169 | 1668 | 0 |
| 3822 | YGL031C  | C | RPL24A | 7216 | 7761 | 0 |
| 3823 | YGL117W  | W |        | 526  | 505  | 0 |
| 3824 | YGL119W  | W | ABC1   | 678  | 840  | 0 |
| 3825 | YGL121C  | C |        | 420  | 631  | 0 |
| 3826 | YGL123W  | W | RPS2   | 7569 | 6797 | 0 |
| 3827 | YGL125W  | W | MET13  | 605  | 643  | 0 |
| 3828 | YGL127C  | C | SOH1   | 725  | 780  | 0 |
| 3829 | YGL213C  | C | SKI8   | 1446 | 1310 | 0 |
| 3830 | YGL215W  | W | CLG1   | 1768 | 2336 | 0 |
| 3831 | YGL217C  | C |        | 510  | 427  | 0 |
| 3832 | YGL219C  | C | MMM2   | 826  | 1012 | 0 |
| 3833 | YGL221C  | C | NIF3   | 1483 | 2257 | 0 |
| 3834 | YGL223C  | C | TFI1   | 772  | 895  | 0 |
| 3835 | YGR046W  | W |        | 751  | 699  | 0 |
| 3836 | YGR048W  | W | UFD1   | 885  | 1161 | 0 |
| 3837 | YGR050C  | C |        | 476  | 361  | 0 |
| 3838 | YGR052W  | W |        | 554  | 664  | 0 |
| 3839 | YGR054W  | W |        | 2852 | 3162 | 0 |
| 3840 | YGR056W  | W | RSC1   | 876  | 1011 | 0 |
| 3841 | YGR142W  | W | BTN2   | 701  | 590  | 0 |
| 3842 | YGR144W  | W | THI4   | 405  | 300  | 0 |
| 3843 | YGR146C  | C |        | 638  | 877  | 0 |
| 3844 | YGR148C  | C | RPL24B | 6103 | 7006 | 0 |
| 3845 | YGR150C  | C |        | 399  | 425  | 1 |
| 3846 | YGR152C  | C | RSR1   | 1086 | 1377 | 0 |
| 3847 | YGR238C  | C | KEL2   | 444  | 433  | 0 |

|      |         |   |       |      |      |   |
|------|---------|---|-------|------|------|---|
| 3848 | YGR240C | C | PFK1  | 2406 | 2410 | 0 |
| 3849 | YGR242W | W |       | 622  | 504  | 0 |
| 3850 | YGR244C | C | LSC2  | 948  | 2171 | 0 |
| 3851 | YGR246C | C | BRF1  | 595  | 755  | 0 |
| 3852 | YGR248W | W | SOL4  | 472  | 1106 | 0 |
| 3853 | YHL038C | C | CBP2  | 575  | 627  | 0 |
| 3854 | YHL040C | C | ARN1  | 283  | 223  | 1 |
| 3855 | YHL042W | W |       | 376  | 290  | 0 |
| 3856 | YHL044W | W |       | 431  | 354  | 0 |
| 3857 | YHL046C | C |       | 619  | 536  | 0 |
| 3858 | YHL048W | W | COS8  | 2107 | 2431 | 0 |
| 3859 | YHR082C | C | KSP1  | 925  | 1038 | 0 |
| 3860 | YHR084W | W | STE12 | 1577 | 2170 | 0 |
| 3861 | YHR086W | W | NAM8  | 1122 | 985  | 0 |
| 3862 | YHR088W | W | RPF1  | 1082 | 1712 | 0 |
| 3863 | YHR090C | C | YNG2  | 668  | 787  | 0 |
| 3864 | YHR092C | C | HXT4  | 429  | 308  | 2 |
| 3865 | YHR177W | W |       | 431  | 346  | 0 |
| 3866 | YHR179W | W | OYE2  | 3692 | 3045 | 0 |
| 3867 | YHR181W | W |       | 1066 | 1084 | 0 |
| 3868 | YHR183W | W | GND1  | 322  | 239  | 1 |
| 3869 | YHR185C | C | PFS1  | 374  | 235  | 0 |
| 3870 | YHR187W | W | IKI1  | 663  | 807  | 0 |
| 3871 | YIL054W | W | FYV2  | 352  | 276  | 0 |
| 3872 | YIL056W | W |       | 778  | 718  | 0 |
| 3873 | YIL058W | W |       | 470  | 405  | 0 |
| 3874 | YIL060W | W |       | 2402 | 3111 | 0 |
| 3875 | YIL062C | C | ARC15 | 1205 | 1548 | 0 |
| 3876 | YIL064W | W |       | 754  | 756  | 0 |
| 3877 | YIL151C | C |       | 287  | 226  | 1 |
| 3878 | YIL153W | W | RRD1  | 792  | 805  | 0 |
| 3879 | YIL155C | C | GUT2  | 890  | 1013 | 1 |
| 3880 | YIL157C | C |       | 898  | 925  | 0 |
| 3881 | YIL159W | W | BNR1  | 362  | 358  | 0 |
| 3882 | YIL161W | W |       | 729  | 744  | 0 |
| 3883 | YJL026W | W | RNR2  | 2504 | 2058 | 0 |
| 3884 | YJL028W | W |       | 334  | 265  | 0 |
| 3885 | YJL030W | W | MAD2  | 274  | 205  | 1 |
| 3886 | YJL032W | W |       | 499  | 620  | 0 |
| 3887 | YJL034W | W | KAR2  | 3036 | 3484 | 0 |
| 3888 | YJL036W | W | SNX4  | 401  | 412  | 1 |
| 3889 | YJL123C | C |       | 843  | 1545 | 0 |
| 3890 | YJL125C | C | GCD14 | 878  | 1125 | 0 |
| 3891 | YJL127C | C | SPT10 | 342  | 316  | 0 |
| 3892 | YJL129C | C | TRK1  | 593  | 699  | 0 |
| 3893 | YJL131C | C |       | 362  | 389  | 0 |
| 3894 | YJL133W | W | MRS3  | 718  | 768  | 0 |
| 3895 | YJL219W | W | HXT9  | 521  | 427  | 0 |
| 3896 | YJL221C | C | FSP2  | 623  | 536  | 0 |
| 3897 | YJL223C | C | PAU1  | 771  | 646  | 0 |
| 3898 | YJR001W | W |       | 1374 | 1255 | 0 |
| 3899 | YJR003C | C |       | 957  | 874  | 0 |

|      |         |   |        |      |       |   |
|------|---------|---|--------|------|-------|---|
| 3900 | YJR005W | W | APL1   | 521  | 564   | 0 |
| 3901 | YJR091C | C | JSN1   | 637  | 563   | 0 |
| 3902 | YJR093C | C | FIP1   | 817  | 821   | 0 |
| 3903 | YJR095W | W | SFC1   | 333  | 254   | 0 |
| 3904 | YJR097W | W |        | 434  | 490   | 0 |
| 3905 | YJR099W | W | YUH1   | 566  | 717   | 0 |
| 3906 | YJR101W | W | RSM26  | 360  | 329   | 1 |
| 3907 | YKL024C | C | URA6   | 1387 | 1658  | 0 |
| 3908 | YKL026C | C | GPX1   | 338  | 343   | 0 |
| 3909 | YKL028W | W | TFA1   | 768  | 1107  | 0 |
| 3910 | YKL030W | W |        | 1167 | 1562  | 0 |
| 3911 | YKL032C | C | IXR1   | 381  | 402   | 1 |
| 3912 | YKL034W | W |        | 948  | 877   | 0 |
| 3913 | YKL119C | C | VPH2   | 757  | 825   | 0 |
| 3914 | YKL121W | W |        | 475  | 491   | 0 |
| 3915 | YKL123W | W |        | 480  | 434   | 0 |
| 3916 | YKL125W | W | RRN3   | 711  | 859   | 0 |
| 3917 | YKL127W | W | PGM1   | 1860 | 1322  | 0 |
| 3918 | YKL129C | C | MYO3   | 540  | 778   | 0 |
| 3919 | YKL215C | C |        | 410  | 447   | 0 |
| 3920 | YKL217W | W | JEN1   | 369  | 296   | 0 |
| 3921 | YKL219W | W | COS9   | 1037 | 1114  | 0 |
| 3922 | YKL221W | W |        | 406  | 287   | 0 |
| 3923 | YKL223W | W |        | 1276 | 956   | 0 |
| 3924 | YKL225W | W |        | 398  | 262   | 0 |
| 3925 | YKR086W | W | PRP16  | 296  | 246   | 2 |
| 3926 | YKR088C | C |        | 1073 | 981   | 0 |
| 3927 | YKR090W | W | PXL1   | 693  | 665   | 0 |
| 3928 | YKR092C | C | SRP40  | 1785 | 2617  | 0 |
| 3929 | YKR094C | C | RPL40B | 1858 | 2104  | 0 |
| 3930 | YKR096W | W |        | 432  | 474   | 0 |
| 3931 | YLR009W | W | RLP24  | 1220 | 1679  | 0 |
| 3932 | YLR011W | W | LOT6   | 403  | 373   | 0 |
| 3933 | YLR013W | W | GAT3   | 281  | 185   | 0 |
| 3934 | YLR015W | W | BRE2   | 470  | 605   | 0 |
| 3935 | YLR017W | W | MEU1   | 797  | 949   | 0 |
| 3936 | YLR019W | W | PSR2   | 841  | 835   | 0 |
| 3937 | YLR105C | C | SEN2   | 633  | 690   | 0 |
| 3938 | YLR107W | W | REX3   | 627  | 847   | 0 |
| 3939 | YLR109W | W | AHP1   | 5173 | 12343 | 0 |
| 3940 | YLR111W | W |        | 400  | 325   | 0 |
| 3941 | YLR113W | W | HOG1   | 1711 | 1839  | 0 |
| 3942 | YLR115W | W | CFT2   | 622  | 745   | 0 |
| 3943 | YLR201C | C |        | 916  | 956   | 0 |
| 3944 | YLR203C | C | MSS51  | 1462 | 1638  | 0 |
| 3945 | YLR205C | C |        | 392  | 434   | 0 |
| 3946 | YLR207W | W | HRD3   | 715  | 862   | 0 |
| 3947 | YLR209C | C | PNP1   | 4036 | 2667  | 0 |
| 3948 | YLR211C | C |        | 497  | 511   | 0 |
| 3949 | YLR297W | W |        | 577  | 618   | 0 |
| 3950 | YLR299W | W | ECM38  | 590  | 598   | 0 |
| 3951 | YLR301W | W |        | 1466 | 2047  | 0 |

|      |         |   |        |      |      |   |
|------|---------|---|--------|------|------|---|
| 3952 | YLR303W | W | MET17  | 1699 | 2567 | 0 |
| 3953 | YLR305C | C | STT4   | 364  | 316  | 2 |
| 3954 | YLR307W | W | CDA1   | 309  | 216  | 0 |
| 3955 | YLR393W | W | ATP10  | 571  | 438  | 0 |
| 3956 | YLR395C | C | COX8   | 885  | 796  | 0 |
| 3957 | YLR397C | C | AFG2   | 860  | 1037 | 0 |
| 3958 | YLR399C | C | BDF1   | 2148 | 2372 | 2 |
| 3959 | YLR401C | C |        | 1117 | 1592 | 0 |
| 3960 | YLR403W | W | SFP1   | 994  | 1135 | 0 |
| 3961 | YML027W | W | YOX1   | 900  | 1119 | 0 |
| 3962 | YML029W | W | USA1   | 695  | 785  | 0 |
| 3963 | YML031W | W | NDC1   | 1482 | 1626 | 0 |
| 3964 | YML034W | W | SRC1   | 743  | 760  | 0 |
| 3965 | YML035C | C | AMD1   | 710  | 1035 | 0 |
| 3966 | YML038C | C | YMD8   | 895  | 889  | 0 |
| 3967 | YMR002W | W |        | 1406 | 2107 | 0 |
| 3968 | YMR004W | W | MVP1   | 729  | 983  | 0 |
| 3969 | YMR007W | W |        | 527  | 455  | 0 |
| 3970 | YMR009W | W |        | 618  | 796  | 0 |
| 3971 | YMR011W | W | HXT2   | 5936 | 6301 | 0 |
| 3972 | YMR013C | C | SEC59  | 779  | 730  | 0 |
| 3973 | YMR107W | W |        | 346  | 261  | 0 |
| 3974 | YMR109W | W | MY05   | 611  | 797  | 0 |
| 3975 | YMR111C | C |        | 499  | 570  | 0 |
| 3976 | YMR113W | W | FOL3   | 646  | 653  | 0 |
| 3977 | YMR115W | W |        | 1001 | 1049 | 0 |
| 3978 | YMR119W | W | ASI1   | 1063 | 963  | 0 |
| 3979 | YMR214W | W | SCJ1   | 866  | 1159 | 0 |
| 3980 | YMR216C | C | SKY1   | 1208 | 1622 | 0 |
| 3981 | YMR218C | C | TRS130 | 605  | 673  | 0 |
| 3982 | YMR220W | W | ERG8   | 1449 | 1979 | 0 |
| 3983 | YMR222C | C |        | 765  | 787  | 0 |
| 3984 | YMR224C | C | MRE11  | 547  | 529  | 0 |
| 3985 | YMR319C | C | FET4   | 627  | 527  | 0 |
| 3986 | YMR321C | C |        | 1407 | 1455 | 0 |
| 3987 | YMR323W | W |        | 468  | 359  | 0 |
| 3988 | YMR326C | C |        | 508  | 373  | 0 |
| 3989 | YNL002C | C | RLP7   | 1813 | 2622 | 0 |
| 3990 | YNL004W | W | HRB1   | 971  | 1215 | 0 |
| 3991 | YNL090W | W | RHO2   | 765  | 895  | 0 |
| 3992 | YNL092W | W |        | 473  | 414  | 0 |
| 3993 | YNL094W | W |        | 1014 | 1297 | 0 |
| 3994 | YNL096C | C | RPS7B  | 4010 | 4739 | 0 |
| 3995 | YNL098C | C | RAS2   | 1798 | 2301 | 0 |
| 3996 | YNL100W | W |        | 763  | 807  | 0 |
| 3997 | YNL186W | W | UBP10  | 1364 | 2250 | 0 |
| 3998 | YNL188W | W | KAR1   | 835  | 963  | 0 |
| 3999 | YNL190W | W |        | 4160 | 4576 | 0 |
| 4000 | YNL192W | W | CHS1   | 816  | 1162 | 0 |
| 4001 | YNL194C | C |        | 368  | 277  | 0 |
| 4002 | YNL196C | C | SLZ1   | 376  | 294  | 0 |
| 4003 | YNL282W | W | POP3   | 654  | 735  | 0 |

|      |         |   |        |      |      |   |
|------|---------|---|--------|------|------|---|
| 4004 | YNL284C | C | MRPL10 | 1024 | 1229 | 0 |
| 4005 | YNL286W | W | CUS2   | 627  | 689  | 0 |
| 4006 | YNL288W | W | CAF40  | 1177 | 1067 | 0 |
| 4007 | YNL290W | W | RFC3   | 979  | 1264 | 0 |
| 4008 | YNL292W | W | PUS4   | 986  | 1098 | 0 |
| 4009 | YNR039C | C | ZRG17  | 580  | 629  | 0 |
| 4010 | YNR041C | C | COQ2   | 686  | 699  | 0 |
| 4011 | YNR043W | W | MVD1   | 1388 | 1547 | 0 |
| 4012 | YNR045W | W | PET494 | 472  | 394  | 0 |
| 4013 | YNR047W | W |        | 457  | 412  | 0 |
| 4014 | YNR049C | C | MSO1   | 480  | 467  | 0 |
| 4015 | YOL057W | W |        | 1122 | 1166 | 0 |
| 4016 | YOL059W | W | GPD2   | 1385 | 2382 | 0 |
| 4017 | YOL061W | W | PRS5   | 2038 | 2027 | 0 |
| 4018 | YOL063C | C |        | 582  | 566  | 0 |
| 4019 | YOL065C | C | INP54  | 565  | 561  | 0 |
| 4020 | YOL067C | C | RTG1   | 700  | 712  | 0 |
| 4021 | YOL153C | C |        | 594  | 654  | 0 |
| 4022 | YOL155C | C |        | 836  | 1155 | 0 |
| 4023 | YOL157C | C |        | 534  | 471  | 0 |
| 4024 | YOL159C | C |        | 436  | 390  | 0 |
| 4025 | YOL161C | C |        | 713  | 551  | 0 |
| 4026 | YOL163W | W |        | 319  | 225  | 0 |
| 4027 | YOR083W | W |        | 388  | 323  | 0 |
| 4028 | YOR085W | W | OST3   | 2636 | 2388 | 0 |
| 4029 | YOR087W | W |        | 860  | 727  | 0 |
| 4030 | YOR089C | C | VPS21  | 1167 | 1538 | 0 |
| 4031 | YOR091W | W |        | 1888 | 2970 | 0 |
| 4032 | YOR093C | C |        | 335  | 267  | 1 |
| 4033 | YOR179C | C |        | 483  | 555  | 0 |
| 4034 | YOR181W | W | LAS17  | 782  | 630  | 0 |
| 4035 | YOR183W | W | FYV12  | 272  | 197  | 0 |
| 4036 | YOR185C | C | GSP2   | 1110 | 2488 | 0 |
| 4037 | YOR187W | W | TUF1   | 2016 | 2511 | 0 |
| 4038 | YOR189W | W | IES4   | 634  | 697  | 0 |
| 4039 | YOR275C | C |        | 720  | 823  | 0 |
| 4040 | YOR277C | C |        | 1426 | 1407 | 0 |
| 4041 | YOR279C | C |        | 438  | 436  | 0 |
| 4042 | YOR281C | C | PLP2   | 988  | 1358 | 0 |
| 4043 | YOR283W | W |        | 774  | 1010 | 0 |
| 4044 | YOR285W | W |        | 1015 | 2062 | 0 |
| 4045 | YOR371C | C | GPE1   | 262  | 210  | 1 |
| 4046 | YOR373W | W | NUD1   | 260  | 201  | 1 |
| 4047 | YOR375C | C | GDH1   | 876  | 665  | 0 |
| 4048 | YOR377W | W | ATF1   | 356  | 235  | 0 |
| 4049 | YOR379C | C |        | 329  | 244  | 0 |
| 4050 | YOR381W | W | FRE3   | 266  | 168  | 1 |
| 4051 | YPL073C | C |        | 275  | 206  | 1 |
| 4052 | YPL075W | W | GCR1   | 330  | 310  | 2 |
| 4053 | YPL077C | C |        | 408  | 377  | 0 |
| 4054 | YPL079W | W | RPL21B | 1198 | 1406 | 0 |
| 4055 | YPL081W | W | RPS9A  | 1510 | 1833 | 0 |

|      |         |   |        |       |       |   |
|------|---------|---|--------|-------|-------|---|
| 4056 | YPL083C | C | SEN54  | 539   | 663   | 0 |
| 4057 | YPL169C | C | MEX67  | 806   | 1056  | 0 |
| 4058 | YPL171C | C | OYE3   | 248   | 175   | 1 |
| 4059 | YPL173W | W | MRPL40 | 391   | 472   | 0 |
| 4060 | YPL175W | W | SPT14  | 473   | 505   | 0 |
| 4061 | YPL177C | C | CUP9   | 801   | 1063  | 0 |
| 4062 | YPL179W | W | PPQ1   | 1454  | 1604  | 0 |
| 4063 | YPL265W | W | DIP5   | 1466  | 2260  | 0 |
| 4064 | YPL267W | W |        | 596   | 731   | 0 |
| 4065 | YPL269W | W | KAR9   | 626   | 520   | 0 |
| 4066 | YPL271W | W | ATP15  | 245   | 155   | 0 |
| 4067 | YPL273W | W | SAM4   | 1475  | 1501  | 0 |
| 4068 | YPL275W | W |        | 437   | 297   | 0 |
| 4069 | YPR078C | C |        | 378   | 286   | 0 |
| 4070 | YPR080W | W | TEF1   | 13102 | 12927 | 0 |
| 4071 | YPR082C | C | DIB1   | 774   | 755   | 0 |
| 4072 | YPR084W | W |        | 637   | 604   | 0 |
| 4073 | YPR086W | W | SUA7   | 1288  | 1535  | 0 |
| 4074 | YPR088C | C | SRP54  | 1524  | 2001  | 0 |
| 4075 | YPR174C | C |        | 254   | 168   | 0 |
| 4076 | YPR176C | C | BET2   | 875   | 846   | 0 |
| 4077 | YPR178W | W | PRP4   | 584   | 614   | 0 |
| 4078 | YPR180W | W | AOS1   | 802   | 1042  | 0 |
| 4079 | YPR182W | W | SMX3   | 617   | 618   | 0 |
| 4080 | YPR184W | W | GDB1   | 323   | 362   | 0 |
| 4081 | NORF 28 |   |        | 409   | 337   | 0 |
| 4082 | NORF 32 |   |        | 471   | 460   | 0 |
| 4083 | NORF 36 |   |        | 291   | 237   | 0 |
| 4084 | NORF 40 |   |        | 1148  | 773   | 0 |
| 4085 | NORF 44 |   |        | 828   | 1357  | 0 |
| 4086 | NORF 48 |   |        | 440   | 324   | 0 |
| 4087 | YCLX05C |   |        | 605   | 686   | 0 |
| 4088 | YCR026C | C |        | 411   | 459   | 0 |
| 4089 | YCR028C | C | FEN2   | 744   | 687   | 0 |
| 4090 | YCR032W | W | BPH1   | 668   | 818   | 1 |
| 4091 | YCR045C | C |        | 797   | 786   | 0 |
| 4092 | YCR067C | C | SED4   | 484   | 453   | 1 |
| 4093 | YGR217W | W | CCH1   | 291   | 250   | 1 |
| 4094 | YGR271W | W | SLH1   | 561   | 605   | 2 |
| 4095 | YGR292W | W | MAL12  | 473   | 370   | 0 |
| 4096 | YHL040C | C | ARN1   | 595   | 625   | 0 |
| 4097 | YHR007C | C | ERG11  | 4087  | 3796  | 0 |
| 4098 | YHR009C | C |        | 1189  | 1488  | 0 |
| 4099 | YML103C | C | NUP188 | 440   | 359   | 1 |
| 4100 | YMR019W | W | STB4   | 594   | 675   | 2 |
| 4101 | YMR101C | C | SRT1   | 349   | 266   | 0 |
| 4102 | YMR103C | C |        | 449   | 368   | 2 |
| 4103 | YMR162C | C | DNF3   | 292   | 220   | 1 |
| 4104 | YMR173W | W | DDR48  | 1557  | 3453  | 1 |
| 4105 | YPR071W | W |        | 610   | 618   | 0 |
| 4106 | YPR104C | C | FHL1   | 620   | 775   | 2 |
| 4107 | YPR135W | W | CTF4   | 336   | 369   | 1 |

|      |                         |   |         |      |      |   |
|------|-------------------------|---|---------|------|------|---|
| 4108 | YPR164W                 | W | MMS1    | 378  | 413  | 1 |
| 4109 | YPR189W                 | W | SKI3    | 295  | 229  | 1 |
| 4110 | EMPTY                   |   |         | 307  | 235  | 0 |
| 4111 | YML036W                 | W |         | 519  | 555  | 0 |
| 4112 | YDR240C                 | C | SNU56   | 566  | 617  | 0 |
| 4113 | YDR242W                 | W | AMD2    | 546  | 568  | 0 |
| 4114 | YDR244W                 | W | PEX5    | 601  | 718  | 0 |
| 4115 | YAL043C- <del>A</del> C |   | KRE23   | 744  | 758  | 0 |
| 4116 | YDR247W                 | W |         | 628  | 462  | 0 |
| 4117 | YMR116C                 | C | ASC1    | 6146 | 4611 | 0 |
| 4118 | YMR169C                 | C | ALD3    | 304  | 269  | 1 |
| 4119 | YMR175W                 | W | SIP18   | 322  | 405  | 0 |
| 4120 | YMR251W                 | W |         | 893  | 2698 | 0 |
| 4121 | YMR273C                 | C | ZDS1    | 730  | 1172 | 1 |
| 4122 | YOL053C                 |   |         | 440  | 687  | 0 |
| 4123 | YGR162W                 | W | TIF4631 | 598  | 678  | 0 |
| 4124 | YHL023C                 | C |         | 351  | 401  | 0 |
| 4125 | YHL030W                 | W | ECM29   | 466  | 645  | 0 |
| 4126 | YHL039W                 | W |         | 728  | 826  | 0 |
| 4127 | YHR024C                 | C | MAS2    | 857  | 1069 | 2 |
| 4128 | YHR030C                 | C | SLT2    | 591  | 886  | 2 |
| 4129 | YML117W- <del>A</del> W |   |         | 661  | 799  | 0 |
| 4130 | YMR045C                 | C |         | 4276 | 5709 | 2 |
| 4131 | YMR052C- <del>A</del> C |   |         | 388  | 419  | 0 |
| 4132 | YMR086C- <del>A</del> C |   |         | 350  | 335  | 0 |
| 4133 | YMR135W- <del>A</del> W |   |         | 578  | 591  | 0 |
| 4134 | YMR143W                 | W | RPS16A  | 3237 | 3443 | 0 |
| 4135 | YLR114C                 | C | EFR4    | 1205 | 1385 | 2 |
| 4136 | YLR141W                 | W | RRN5    | 276  | 219  | 1 |
| 4137 | YLR347C                 | C | KAP95   | 1676 | 1612 | 0 |
| 4138 | YLR375W                 | W | STP3    | 908  | 1074 | 2 |
| 4139 | YLR399C                 | C | BDF1    | 1739 | 1686 | 2 |
| 4140 | YLR446W                 | W |         | 604  | 474  | 0 |
| 4141 | NORF 98                 |   |         | 260  | 195  | 0 |
| 4142 | NORF 100                |   |         | 250  | 162  | 1 |
| 4143 | NORF 102                |   |         | 293  | 262  | 2 |
| 4144 | NORF 104                |   |         | 407  | 385  | 3 |
| 4145 | NORF 106                |   |         | 255  | 156  | 0 |
| 4146 | NORF 109                |   |         | 266  | 172  | 0 |
| 4147 | EMPTY                   |   |         | 242  | 154  | 0 |
| 4148 | EMPTY                   |   |         | 247  | 168  | 0 |
| 4149 | EMPTY                   |   |         | 246  | 165  | 0 |
| 4150 | EMPTY                   |   |         | 264  | 176  | 0 |
| 4151 | EMPTY                   |   |         | 260  | 174  | 0 |
| 4152 | EMPTY                   |   |         | 266  | 190  | 0 |
| 4153 | YCR001W                 | W |         | 234  | 168  | 1 |
| 4154 | YCR024C- <del>A</del> C |   | PMP1    | 233  | 157  | 1 |
| 4155 | YDL031W                 | W | DBP10   | 823  | 1150 | 0 |
| 4156 | YDL073W                 | W |         | 545  | 631  | 0 |
| 4157 | YDL113C                 | C |         | 322  | 300  | 0 |
| 4158 | YDL203C                 | C |         | 516  | 578  | 0 |
| 4159 | EMPTY                   |   |         | 243  | 155  | 0 |

|                |      |      |   |
|----------------|------|------|---|
| 4160 EMPTY     | 239  | 158  | 0 |
| 4161 EMPTY     | 245  | 156  | 0 |
| 4162 EMPTY     | 240  | 156  | 0 |
| 4163 EMPTY     | 240  | 153  | 0 |
| 4164 EMPTY     | 237  | 148  | 0 |
| 4165 EMPTY     | 242  | 159  | 0 |
| 4166 EMPTY     | 243  | 141  | 0 |
| 4167 EMPTY     | 241  | 154  | 0 |
| 4168 EMPTY     | 246  | 142  | 0 |
| 4169 EMPTY     | 241  | 154  | 0 |
| 4170 EMPTY     | 244  | 151  | 0 |
| 4171 EMPTY     | 235  | 149  | 0 |
| 4172 EMPTY     | 242  | 158  | 0 |
| 4173 EMPTY     | 252  | 153  | 0 |
| 4174 EMPTY     | 245  | 165  | 0 |
| 4175 EMPTY     | 251  | 177  | 0 |
| 4176 EMPTY     | 267  | 185  | 0 |
| 4177 CY3 0. 1X | 248  | 164  | 0 |
| 4178 3XSSC     | 242  | 159  | 0 |
| 4179 3XSSC     | 249  | 179  | 0 |
| 4180 CY5 0. 1X | 253  | 148  | 0 |
| 4181 3XSSC     | 242  | 167  | 0 |
| 4182 3XSSC     | 240  | 161  | 0 |
| 4183 EMPTY     | 244  | 163  | 0 |
| 4184 EMPTY     | 240  | 160  | 0 |
| 4185 EMPTY     | 240  | 156  | 0 |
| 4186 EMPTY     | 243  | 156  | 0 |
| 4187 EMPTY     | 238  | 154  | 0 |
| 4188 EMPTY     | 240  | 152  | 0 |
| 4189 EMPTY     | 254  | 152  | 0 |
| 4190 EMPTY     | 241  | 148  | 0 |
| 4191 EMPTY     | 239  | 148  | 0 |
| 4192 EMPTY     | 569  | 511  | 0 |
| 4193 EMPTY     | 3562 | 4080 | 0 |
| 4194 EMPTY     | 276  | 143  | 0 |
| 4195 EMPTY     | 252  | 150  | 0 |
| 4196 EMPTY     | 250  | 162  | 0 |
| 4197 EMPTY     | 248  | 162  | 0 |
| 4198 EMPTY     | 248  | 164  | 0 |
| 4199 EMPTY     | 255  | 170  | 0 |
| 4200 EMPTY     | 261  | 175  | 0 |
| 4201 CY3 0. 1X | 787  | 158  | 0 |
| 4202 3XSSC     | 233  | 151  | 0 |
| 4203 3XSSC     | 233  | 152  | 0 |
| 4204 CY5 0. 1X | 252  | 161  | 0 |
| 4205 3XSSC     | 243  | 156  | 0 |
| 4206 3XSSC     | 241  | 156  | 0 |
| 4207 EMPTY     | 240  | 165  | 0 |
| 4208 EMPTY     | 247  | 153  | 0 |
| 4209 EMPTY     | 235  | 152  | 0 |
| 4210 EMPTY     | 241  | 149  | 0 |
| 4211 EMPTY     | 240  | 152  | 0 |

|      |                         |   |        |      |       |   |
|------|-------------------------|---|--------|------|-------|---|
| 4212 | EMPTY                   |   | 235    | 154  | 0     |   |
| 4213 | EMPTY                   |   | 257    | 156  | 0     |   |
| 4214 | EMPTY                   |   | 238    | 146  | 0     |   |
| 4215 | EMPTY                   |   | 236    | 148  | 0     |   |
| 4216 | EMPTY                   |   | 234    | 146  | 0     |   |
| 4217 | EMPTY                   |   | 243    | 149  | 0     |   |
| 4218 | EMPTY                   |   | 252    | 158  | 0     |   |
| 4219 | EMPTY                   |   | 260    | 156  | 0     |   |
| 4220 | EMPTY                   |   | 255    | 157  | 0     |   |
| 4221 | EMPTY                   |   | 250    | 164  | 0     |   |
| 4222 | EMPTY                   |   | 256    | 168  | 0     |   |
| 4223 | EMPTY                   |   | 263    | 164  | 0     |   |
| 4224 | EMPTY                   |   | 259    | 172  | 0     |   |
| 4225 | YBR207W                 | W | FTH1   | 602  | 693   | 0 |
| 4226 | YBR209W                 | W |        | 359  | 286   | 0 |
| 4227 | YBR211C                 | C | AME1   | 590  | 574   | 0 |
| 4228 | YBR213W                 | W | MET8   | 436  | 399   | 0 |
| 4229 | YBR215W                 | W | HPC2   | 778  | 1027  | 0 |
| 4230 | YBR217W                 | W | APG12  | 675  | 728   | 0 |
| 4231 | YCL001W                 | W | RER1   | 308  | 246   | 1 |
| 4232 | YCL003W                 |   |        | 577  | 576   | 0 |
| 4233 | YCL005W                 | W |        | 806  | 782   | 0 |
| 4234 | YCL007C                 | C | CWH36  | 543  | 553   | 0 |
| 4235 | YCL009C                 | C | ILV6   | 3479 | 3416  | 0 |
| 4236 | YCL011C                 | C | GBP2   | 428  | 436   | 0 |
| 4237 | YCR013C                 | C |        | 6994 | 12147 | 0 |
| 4238 | YCR015C                 | C |        | 1293 | 1486  | 0 |
| 4239 | YCR017C                 | C | CWH43  | 334  | 259   | 1 |
| 4240 | YCR019W                 | W | MAK32  | 625  | 740   | 0 |
| 4241 | YCR020C- <del>A</del> C |   | MAK31  | 552  | 585   | 0 |
| 4242 | YCR022C                 | C |        | 434  | 313   | 0 |
| 4243 | YCR106W                 | W |        | 576  | 512   | 0 |
| 4244 | YCRX01W                 |   |        | 733  | 715   | 0 |
| 4245 | YCRX03C                 |   |        | 481  | 365   | 0 |
| 4246 | YCRX05W                 |   |        | 857  | 1006  | 0 |
| 4247 | YCRX07W                 |   |        | 701  | 598   | 0 |
| 4248 | YCRX09C                 |   |        | 471  | 411   | 0 |
| 4249 | YDL074C                 | C | BRE1   | 445  | 533   | 0 |
| 4250 | YDL076C                 | C |        | 661  | 826   | 0 |
| 4251 | YDL078C                 | C | MDH3   | 1168 | 1759  | 0 |
| 4252 | YDL080C                 | C | THI3   | 552  | 626   | 0 |
| 4253 | YDL082W                 | W | RPL13A | 4250 | 5611  | 0 |
| 4254 | YDL084W                 | W | SUB2   | 2351 | 2767  | 0 |
| 4255 | YDL170W                 | W | UGA3   | 588  | 710   | 0 |
| 4256 | YDL172C                 | C |        | 1436 | 1846  | 0 |
| 4257 | YDL174C                 | C | DLD1   | 515  | 562   | 1 |
| 4258 | YDL176W                 | W |        | 760  | 796   | 0 |
| 4259 | YDL178W                 | W | DLD2   | 1104 | 1604  | 0 |
| 4260 | YDL180W                 | W |        | 606  | 550   | 0 |
| 4261 | YDR018C                 | C |        | 413  | 338   | 0 |
| 4262 | YDR020C                 | C |        | 628  | 763   | 0 |
| 4263 | YDR022C                 | C | CIS1   | 497  | 580   | 0 |

|      |         |   |        |      |      |   |
|------|---------|---|--------|------|------|---|
| 4264 | YDR024W | W | FYV1   | 748  | 783  | 0 |
| 4265 | YDR026C | C |        | 584  | 699  | 0 |
| 4266 | YDR028C | C | REG1   | 406  | 364  | 1 |
| 4267 | YDR114C | C |        | 488  | 401  | 0 |
| 4268 | YDR116C | C |        | 1050 | 1222 | 0 |
| 4269 | YDR118W | W | APC4   | 852  | 787  | 0 |
| 4270 | YDR120C | C | TRM1   | 2325 | 2977 | 0 |
| 4271 | YDR122W | W | KIN1   | 1039 | 1233 | 0 |
| 4272 | YDR124W | W |        | 738  | 724  | 0 |
| 4273 | YDR210W | W |        | 1068 | 1335 | 0 |
| 4274 | YDR212W | W | TCP1   | 2800 | 3293 | 0 |
| 4275 | YDR214W | W |        | 1943 | 4604 | 0 |
| 4276 | YDR216W | W | ADR1   | 391  | 404  | 1 |
| 4277 | YDR218C | C | SPR28  | 428  | 372  | 0 |
| 4278 | YDR220C | C |        | 539  | 471  | 0 |
| 4279 | YDR306C | C |        | 526  | 639  | 0 |
| 4280 | YDR308C | C | SRB7   | 841  | 1000 | 0 |
| 4281 | YDR310C | C | SUM1   | 491  | 596  | 0 |
| 4282 | YDR312W | W | SSF2   | 1374 | 2716 | 0 |
| 4283 | YDR314C | C |        | 435  | 453  | 0 |
| 4284 | YDR316W | W |        | 544  | 659  | 0 |
| 4285 | YDR402C | C | DIT2   | 1179 | 748  | 0 |
| 4286 | YDR404C | C | RPB7   | 1302 | 1322 | 0 |
| 4287 | YDR406W | W | PDR15  | 540  | 567  | 1 |
| 4288 | YDR408C | C | ADE8   | 851  | 991  | 0 |
| 4289 | YDR410C | C | STE14  | 1227 | 1468 | 0 |
| 4290 | YDR412W | W |        | 1240 | 1566 | 0 |
| 4291 | YDR498C | C | SEC20  | 888  | 886  | 0 |
| 4292 | YDR500C | C | RPL37B | 2910 | 3260 | 0 |
| 4293 | YDR502C | C | SAM2   | 3181 | 3781 | 0 |
| 4294 | YDR504C | C |        | 1003 | 1096 | 0 |
| 4295 | YDR506C | C |        | 545  | 540  | 0 |
| 4296 | YDR508C | C | GNP1   | 2199 | 2720 | 0 |
| 4297 | YAL048C | C |        | 374  | 382  | 0 |
| 4298 | YAL051W | W | OAF1   | 343  | 287  | 1 |
| 4299 | YAL054C | C | ACS1   | 340  | 295  | 0 |
| 4300 | YAL056W | W | GPE2   | 364  | 337  | 1 |
| 4301 | YAL059W | W | ECM1   | 635  | 887  | 0 |
| 4302 | YAL061W | W |        | 749  | 1071 | 0 |
| 4303 | YBL039C | C | URA7   | 1178 | 1582 | 0 |
| 4304 | YBL041W | W | PRE7   | 2040 | 3530 | 0 |
| 4305 | YBL043W | W | ECM13  | 431  | 374  | 0 |
| 4306 | YBL045C | C | COR1   | 1639 | 1573 | 0 |
| 4307 | YBL047C | C | EDE1   | 423  | 436  | 0 |
| 4308 | YBL049W | W |        | 468  | 441  | 0 |
| 4309 | YBR018C | C | GAL7   | 1282 | 1171 | 0 |
| 4310 | YBR020W | W | GAL1   | 477  | 389  | 0 |
| 4311 | YBR022W | W |        | 575  | 668  | 0 |
| 4312 | YBR024W | W | SC02   | 599  | 720  | 0 |
| 4313 | YBR026C | C | MRF1'  | 1106 | 2162 | 0 |
| 4314 | YBR028C | C |        | 1089 | 1287 | 0 |
| 4315 | YBR112C | C | CYC8   | 1752 | 2228 | 0 |

|      |         |   |         |       |       |   |
|------|---------|---|---------|-------|-------|---|
| 4316 | YBR114W | W | RAD16   | 627   | 857   | 0 |
| 4317 | YBR116C | C |         | 587   | 1028  | 0 |
| 4318 | YBR118W | W | TEF2    | 14009 | 14696 | 0 |
| 4319 | YBR120C | C | CBP6    | 577   | 552   | 0 |
| 4320 | YBR122C | C | MRPL36  | 1076  | 1320  | 0 |
| 4321 | YEL048C | C |         | 453   | 483   | 0 |
| 4322 | YEL050C | C | RML2    | 698   | 1043  | 0 |
| 4323 | YEL052W | W | AFG1    | 931   | 1004  | 0 |
| 4324 | YEL054C | C | RPL12A  | 2911  | 3608  | 0 |
| 4325 | YEL056W | W | HAT2    | 1360  | 1602  | 0 |
| 4326 | YEL058W | W | PCM1    | 894   | 1185  | 0 |
| 4327 | YER064C | C |         | 1681  | 2121  | 0 |
| 4328 | YER066W | W |         | 731   | 783   | 0 |
| 4329 | YER068W | W | MOT2    | 1387  | 1624  | 0 |
| 4330 | YER070W | W | RNR1    | 2526  | 3509  | 0 |
| 4331 | YER072W | W | VTC1    | 2152  | 4093  | 0 |
| 4332 | YER074W | W | RPS24A  | 4135  | 5060  | 0 |
| 4333 | YER159C | C | BUR6    | 1196  | 1774  | 0 |
| 4334 | YER161C | C | SPT2    | 1086  | 1292  | 0 |
| 4335 | YER163C | C |         | 852   | 1266  | 0 |
| 4336 | YER165W | W | PAB1    | 4857  | 3706  | 0 |
| 4337 | YER167W | W | BCK2    | 1011  | 1190  | 0 |
| 4338 | YER169W | W | RPH1    | 491   | 631   | 0 |
| 4339 | YFL062W | W | COS4    | 2434  | 2850  | 0 |
| 4340 | YFL064C | C |         | 1622  | 1364  | 0 |
| 4341 | YFL066C | C |         | 5015  | 4910  | 0 |
| 4342 | YFL068W | W |         | 3004  | 4027  | 0 |
| 4343 | YFR002W | W | NIC96   | 1232  | 1540  | 0 |
| 4344 | YFR004W | W | RPN11   | 1467  | 2158  | 0 |
| 4345 | YGL032C | C | AGA2    | 1740  | 2710  | 0 |
| 4346 | YGL034C | C |         | 531   | 686   | 1 |
| 4347 | YGL036W | W | MTC2    | 948   | 1057  | 0 |
| 4348 | YGL038C | C | OCH1    | 2322  | 2609  | 0 |
| 4349 | YGL040C | C | HEM2    | 1768  | 2078  | 0 |
| 4350 | YGL042C | C |         | 1218  | 1846  | 0 |
| 4351 | YGL128C | C |         | 584   | 671   | 0 |
| 4352 | YGL130W | W | CEG1    | 956   | 1326  | 0 |
| 4353 | YGL132W | W |         | 557   | 614   | 0 |
| 4354 | YGL134W | W | PCL10   | 741   | 806   | 0 |
| 4355 | YGL136C | C |         | 1067  | 1320  | 0 |
| 4356 | YGL138C | C |         | 421   | 324   | 0 |
| 4357 | YGL224C | C | SDT1    | 955   | 1045  | 0 |
| 4358 | YGL226W | W |         | 602   | 609   | 0 |
| 4359 | YGL228W | W | SHE10   | 1633  | 2117  | 0 |
| 4360 | YGL230C | C |         | 413   | 351   | 0 |
| 4361 | YGL232W | W |         | 1176  | 1566  | 0 |
| 4362 | YGL234W | W | ADE5, 7 | 2842  | 2328  | 0 |
| 4363 | YGR057C | C | LST7    | 631   | 662   | 0 |
| 4364 | YGR059W | W | SPR3    | 351   | 279   | 0 |
| 4365 | YGR061C | C | ADE6    | 1552  | 1206  | 0 |
| 4366 | YGR063C | C | SPT4    | 821   | 871   | 0 |
| 4367 | YGR065C | C | VHT1    | 832   | 1016  | 0 |

|      |         |   |        |      |      |   |
|------|---------|---|--------|------|------|---|
| 4368 | YGR067C | C |        | 361  | 301  | 0 |
| 4369 | YGR153W | W | TOS10  | 537  | 549  | 0 |
| 4370 | YGR155W | W | CYS4   | 3192 | 4220 | 0 |
| 4371 | YGR157W | W | CHO2   | 1003 | 1330 | 0 |
| 4372 | YGR159C | C | NSR1   | 373  | 331  | 1 |
| 4373 | YGR161C | C |        | 534  | 540  | 0 |
| 4374 | YGR163W | W | GTR2   | 946  | 1083 | 0 |
| 4375 | YGR249W | W | MGA1   | 434  | 414  | 0 |
| 4376 | YGR251W | W |        | 580  | 898  | 0 |
| 4377 | YGR253C | C | PUP2   | 1575 | 2664 | 0 |
| 4378 | YGR255C | C | COQ6   | 1209 | 1557 | 0 |
| 4379 | YGR257C | C |        | 709  | 967  | 0 |
| 4380 | YGR259C | C |        | 1065 | 1108 | 0 |
| 4381 | YHL049C | C |        | 2017 | 1741 | 0 |
| 4382 | YHR001W | W | OSH7   | 1080 | 1601 | 0 |
| 4383 | YHR003C | C |        | 1021 | 1337 | 0 |
| 4384 | YHR005C | C | GPA1   | 1516 | 2533 | 0 |
| 4385 | YHR007C | C | ERG11  | 343  | 285  | 1 |
| 4386 | YHR009C | C |        | 383  | 368  | 1 |
| 4387 | YHR093W | W | AHT1   | 457  | 357  | 0 |
| 4388 | YHR095W | W |        | 365  | 283  | 0 |
| 4389 | YHR097C | C |        | 936  | 1176 | 0 |
| 4390 | YHR099W | W | TRA1   | 297  | 230  | 1 |
| 4391 | YHR101C | C | BIG1   | 596  | 546  | 0 |
| 4392 | YHR103W | W | SBE22  | 961  | 1311 | 0 |
| 4393 | YHR188C | C | GPI16  | 1797 | 2180 | 0 |
| 4394 | YHR190W | W | ERG9   | 2310 | 2736 | 0 |
| 4395 | YHR192W | W |        | 991  | 1148 | 0 |
| 4396 | YHR194W | W |        | 722  | 654  | 0 |
| 4397 | YHR196W | W |        | 1447 | 2331 | 0 |
| 4398 | YHR198C | C |        | 827  | 1000 | 0 |
| 4399 | YIL065C | C | FIS1   | 355  | 287  | 0 |
| 4400 | YIL067C | C |        | 344  | 272  | 0 |
| 4401 | YIL069C | C | RPS24B | 354  | 265  | 0 |
| 4402 | YIL071W |   |        | 351  | 301  | 0 |
| 4403 | YIL073C | C | SP022  | 327  | 261  | 1 |
| 4404 | YIL075C | C | RPN2   | 341  | 286  | 0 |
| 4405 | YIL162W | W | SUC2   | 1345 | 1085 | 0 |
| 4406 | YIL164C | C | NIT1   | 593  | 578  | 0 |
| 4407 | YIL166C | C |        | 519  | 474  | 0 |
| 4408 | YIL168W | W | SDL1   | 416  | 398  | 0 |
| 4409 | YIL170W | W | HXT12  | 541  | 470  | 0 |
| 4410 | YIL172C | C |        | 666  | 589  | 0 |
| 4411 | YJL037W | W |        | 365  | 286  | 0 |
| 4412 | YJL039C | C | NUP192 | 430  | 370  | 1 |
| 4413 | YJL042W | W | MHP1   | 827  | 912  | 2 |
| 4414 | YJL044C | C | GYP6   | 1221 | 1470 | 0 |
| 4415 | YJL046W | W |        | 611  | 741  | 0 |
| 4416 | YJL048C | C |        | 556  | 659  | 0 |
| 4417 | YJL134W | W | LCB3   | 1315 | 1500 | 0 |
| 4418 | YJL136C | C | RPS21B | 1899 | 2668 | 2 |
| 4419 | YJL138C | C | TIF2   | 7230 | 6684 | 0 |

|      |                       |   |        |      |      |   |
|------|-----------------------|---|--------|------|------|---|
| 4420 | YJL140W               | W | RPB4   | 1774 | 2854 | 0 |
| 4421 | YJL142C               | C |        | 787  | 827  | 0 |
| 4422 | YJL144W               | W |        | 693  | 777  | 0 |
| 4423 | YJR006W               | W | HYS2   | 909  | 1072 | 0 |
| 4424 | YJR008W               | W |        | 607  | 635  | 0 |
| 4425 | YJR010C- <del>A</del> | C | SPC1   | 667  | 652  | 0 |
| 4426 | YJR011C               | C |        | 643  | 604  | 0 |
| 4427 | YJR013W               | W |        | 787  | 941  | 0 |
| 4428 | YJR015W               | W |        | 2041 | 2086 | 0 |
| 4429 | YJR102C               | C | VPS25  | 672  | 772  | 0 |
| 4430 | YJR104C               | C | SOD1   | 3508 | 6884 | 0 |
| 4431 | YJR106W               | W | ECM27  | 620  | 688  | 0 |
| 4432 | YJR108W               | W | ABM1   | 407  | 342  | 0 |
| 4433 | YJR110W               | W |        | 1499 | 1010 | 0 |
| 4434 | YJR112W               | W | NNF1   | 382  | 390  | 0 |
| 4435 | YKL035W               | W | UGP1   | 3450 | 8389 | 0 |
| 4436 | YKL037W               | W |        | 378  | 306  | 0 |
| 4437 | YKL039W               | W | PTM1   | 1829 | 2068 | 0 |
| 4438 | YKL041W               | W | VPS24  | 906  | 1197 | 0 |
| 4439 | YKL043W               | W | PHD1   | 1140 | 846  | 0 |
| 4440 | YKL045W               | W | PRI2   | 679  | 885  | 0 |
| 4441 | YKL130C               | C | SHE2   | 1263 | 1178 | 0 |
| 4442 | YKL132C               | C | RMA1   | 597  | 496  | 0 |
| 4443 | YKL134C               | C | 1-Oct  | 548  | 650  | 0 |
| 4444 | YKL136W               | W |        | 683  | 915  | 0 |
| 4445 | YKL138C               | C | MRPL31 | 842  | 1197 | 0 |
| 4446 | YKL140W               | W | TGL1   | 951  | 1062 | 0 |
| 4447 | YKR001C               | C | VPS1   | 2128 | 3116 | 0 |
| 4448 | YKR003W               | W | OSH6   | 1306 | 2014 | 0 |
| 4449 | YKR005C               | C |        | 446  | 416  | 0 |
| 4450 | YKR007W               | W |        | 774  | 1021 | 0 |
| 4451 | YKR009C               | C | FOX2   | 433  | 451  | 0 |
| 4452 | YKR011C               | C | TOS5   | 722  | 864  | 0 |
| 4453 | YKR097W               | W | PCK1   | 478  | 445  | 0 |
| 4454 | YKR099W               | W | BAS1   | 630  | 1071 | 0 |
| 4455 | YKR101W               | W | SIR1   | 415  | 481  | 0 |
| 4456 | YKR103W               | W |        | 357  | 308  | 0 |
| 4457 | YKR105C               | C |        | 513  | 479  | 0 |
| 4458 | YLL001W               | W | DNM1   | 879  | 972  | 0 |
| 4459 | YLR020C               | C |        | 1129 | 1335 | 0 |
| 4460 | YLR022C               | C |        | 883  | 893  | 1 |
| 4461 | YLR024C               | C | UBR2   | 450  | 492  | 0 |
| 4462 | YLR026C               | C | SED5   | 1104 | 1356 | 0 |
| 4463 | YLR028C               | C | ADE16  | 2266 | 3668 | 0 |
| 4464 | YLR030W               | W |        | 530  | 489  | 0 |
| 4465 | YLR116W               | W | MSL5   | 1240 | 1401 | 0 |
| 4466 | YLR118C               | C |        | 1173 | 1736 | 0 |
| 4467 | YLR120C               | C | YPS1   | 1739 | 2296 | 0 |
| 4468 | YLR122C               | C |        | 406  | 347  | 0 |
| 4469 | YLR124W               | W |        | 448  | 385  | 0 |
| 4470 | YLR126C               | C |        | 715  | 998  | 0 |
| 4471 | YLR212C               | C | TUB4   | 958  | 1053 | 0 |

|      |         |   |        |       |       |   |
|------|---------|---|--------|-------|-------|---|
| 4472 | YLR214W | W | FRE1   | 2244  | 3112  | 0 |
| 4473 | YLR216C | C | CPR6   | 1785  | 4896  | 0 |
| 4474 | YLR218C | C |        | 579   | 791   | 0 |
| 4475 | YLR220W | W | CCC1   | 1229  | 1417  | 0 |
| 4476 | YLR222C | C |        | 1242  | 1766  | 0 |
| 4477 | YLR308W | W | CDA2   | 346   | 293   | 0 |
| 4478 | YLR310C | C | CDC25  | 404   | 375   | 2 |
| 4479 | YLR312C | C |        | 397   | 337   | 0 |
| 4480 | YLR314C | C | CDC3   | 1876  | 2788  | 0 |
| 4481 | YLR316C | C | TAD3   | 596   | 667   | 0 |
| 4482 | YLR318W | W | EST2   | 332   | 270   | 1 |
| 4483 | YLR404W | W |        | 623   | 638   | 0 |
| 4484 | YLR406C | C | RPL31B | 364   | 391   | 1 |
| 4485 | YLR408C | C |        | 471   | 435   | 0 |
| 4486 | YLR410W | W | VIP1   | 926   | 1616  | 0 |
| 4487 | YLR412W | W |        | 982   | 1269  | 0 |
| 4488 | YLR414C | C |        | 1495  | 1819  | 0 |
| 4489 | YML040W | W |        | 10866 | 16024 | 0 |
| 4490 | YML042W | W | CAT2   | 714   | 752   | 0 |
| 4491 | YML045W | W |        | 11671 | 17044 | 0 |
| 4492 | YML047C | C | PRM6   | 612   | 729   | 0 |
| 4493 | YML049C | C | RSE1   | 408   | 460   | 0 |
| 4494 | YML051W | W | GAL80  | 1538  | 1788  | 0 |
| 4495 | YMR014W | W | BUD22  | 1646  | 2915  | 0 |
| 4496 | YMR016C | C | SOK2   | 1275  | 2024  | 2 |
| 4497 | YMR018W | W |        | 369   | 359   | 0 |
| 4498 | YMR020W | W | FMS1   | 661   | 975   | 0 |
| 4499 | YMR022W | W | QRI8   | 1120  | 1461  | 0 |
| 4500 | YMR024W | W | MRPL3  | 629   | 843   | 0 |
| 4501 | YMR133W | W | REC114 | 485   | 466   | 0 |
| 4502 | YMR135C | C |        | 766   | 861   | 0 |
| 4503 | YMR137C | C | PS02   | 523   | 597   | 0 |
| 4504 | YMR139W | W | RIM11  | 731   | 794   | 0 |
| 4505 | YMR141C | C |        | 611   | 676   | 0 |
| 4506 | YMR145C | C |        | 2284  | 1730  | 0 |
| 4507 | YMR226C | C |        | 2264  | 4244  | 0 |
| 4508 | YMR228W | W | MTF1   | 579   | 682   | 0 |
| 4509 | YMR231W | W | PEP5   | 774   | 873   | 0 |
| 4510 | YMR233W | W | TRI1   | 578   | 590   | 0 |
| 4511 | YMR235C | C | RNA1   | 2784  | 3230  | 0 |
| 4512 | YMR237W | W |        | 1705  | 2017  | 0 |
| 4513 | YNL005C | C | MRP7   | 1034  | 1451  | 0 |
| 4514 | YNL007C | C | SIS1   | 1173  | 1628  | 0 |
| 4515 | YNL009W | W | IDP3   | 576   | 605   | 0 |
| 4516 | YNL011C | C |        | 801   | 816   | 0 |
| 4517 | YNL013C | C |        | 1021  | 913   | 0 |
| 4518 | YNL015W | W | PBI2   | 805   | 2011  | 0 |
| 4519 | YNL101W | W |        | 586   | 743   | 0 |
| 4520 | YNL103W | W | MET4   | 947   | 1432  | 0 |
| 4521 | YNL105W | W |        | 616   | 499   | 0 |
| 4522 | YNL107W | W | YAF9   | 638   | 837   | 0 |
| 4523 | YNL109W | W |        | 960   | 1330  | 0 |

|      |         |   |        |      |      |   |
|------|---------|---|--------|------|------|---|
| 4524 | YNL111C | C | CYB5   | 780  | 1436 | 0 |
| 4525 | YNL197C | C | WHI3   | 1218 | 1328 | 0 |
| 4526 | YNL199C | C | GCR2   | 784  | 1202 | 0 |
| 4527 | YNL201C | C |        | 758  | 1364 | 0 |
| 4528 | YNL203C | C |        | 404  | 373  | 0 |
| 4529 | YNL205C | C |        | 519  | 423  | 0 |
| 4530 | YNL207W | W |        | 345  | 355  | 1 |
| 4531 | YNL293W | W | MSB3   | 583  | 667  | 0 |
| 4532 | YNL295W | W |        | 577  | 667  | 0 |
| 4533 | YNL297C | C | MON2   | 579  | 589  | 0 |
| 4534 | YNL299W | W | TRF5   | 734  | 1014 | 0 |
| 4535 | YNL301C | C | RPL18B | 5012 | 5032 | 0 |
| 4536 | YNL303W | W |        | 1048 | 1015 | 0 |
| 4537 | YNR050C | C | LYS9   | 3142 | 2102 | 0 |
| 4538 | YNR052C | C | POP2   | 1194 | 1943 | 0 |
| 4539 | YNR054C | C |        | 999  | 1740 | 0 |
| 4540 | YNR056C | C | BI05   | 421  | 486  | 0 |
| 4541 | YNR058W | W | BI03   | 370  | 356  | 0 |
| 4542 | YNR060W | W | FRE4   | 568  | 700  | 0 |
| 4543 | YOL068C | C | HST1   | 1168 | 1555 | 0 |
| 4544 | YOL070C | C |        | 1307 | 2186 | 0 |
| 4545 | YOL072W | W | THP1   | 641  | 791  | 0 |
| 4546 | YOL074C |   |        | 561  | 578  | 0 |
| 4547 | YOL076W | W | MDM20  | 950  | 1269 | 0 |
| 4548 | YOL078W | W |        | 319  | 289  | 1 |
| 4549 | YOL164W | W |        | 487  | 525  | 0 |
| 4550 | YOL166C | C |        | 381  | 360  | 0 |
| 4551 | YOR002W | W | ALG6   | 1261 | 1487 | 0 |
| 4552 | YOR004W | W |        | 1168 | 1586 | 0 |
| 4553 | YOR006C | C |        | 808  | 1188 | 0 |
| 4554 | YOR008C | C | SLG1   | 1104 | 1275 | 0 |
| 4555 | YOR094W | W | ARF3   | 781  | 1102 | 0 |
| 4556 | YOR096W | W | RPS7A  | 3376 | 3309 | 0 |
| 4557 | YOR098C | C | NUP1   | 1313 | 1788 | 0 |
| 4558 | YOR100C | C | CRC1   | 390  | 313  | 0 |
| 4559 | YOR102W | W |        | 719  | 718  | 0 |
| 4560 | YOR104W | W | PIN2   | 743  | 697  | 0 |
| 4561 | YOR190W | W | SPR1   | 485  | 440  | 0 |
| 4562 | YOR192C | C |        | 738  | 852  | 0 |
| 4563 | YOR194C | C | TOA1   | 1568 | 2331 | 0 |
| 4564 | YOR196C | C | LIP5   | 1134 | 1503 | 0 |
| 4565 | YOR198C | C | BFR1   | 4487 | 6455 | 0 |
| 4566 | YOR200W | W |        | 726  | 952  | 0 |
| 4567 | YOR286W | W |        | 1111 | 1508 | 0 |
| 4568 | YOR288C | C | MPD1   | 847  | 1010 | 0 |
| 4569 | YOR290C | C | SNF2   | 554  | 670  | 0 |
| 4570 | YOR292C | C |        | 692  | 730  | 0 |
| 4571 | YOR294W | W | RRS1   | 1348 | 1975 | 0 |
| 4572 | YOR296W | W |        | 625  | 903  | 0 |
| 4573 | YOR382W | W | FIT2   | 393  | 961  | 0 |
| 4574 | YOR384W | W | FRE5   | 308  | 279  | 2 |
| 4575 | YOR386W | W | PHR1   | 344  | 347  | 0 |

|      |         |   |       |      |      |   |
|------|---------|---|-------|------|------|---|
| 4576 | YOR388C | C | FDH1  | 334  | 291  | 0 |
| 4577 | YOR390W | W |       | 467  | 428  | 0 |
| 4578 | YOR392W | W |       | 355  | 277  | 0 |
| 4579 | YPL084W | W | BR01  | 746  | 912  | 0 |
| 4580 | YPL086C | C | ELP3  | 959  | 1295 | 0 |
| 4581 | YPL088W | W |       | 380  | 395  | 0 |
| 4582 | YPL090C | C | RPS6A | 2222 | 2550 | 0 |
| 4583 | YPL092W | W | SSU1  | 383  | 352  | 0 |
| 4584 | YPL094C | C | SEC62 | 1731 | 1839 | 0 |
| 4585 | YPL180W | W | SHD7  | 365  | 353  | 1 |
| 4586 | YPL182C | C |       | 677  | 775  | 0 |
| 4587 | YPL184C | C |       | 1711 | 1937 | 0 |
| 4588 | YPL186C | C |       | 406  | 592  | 0 |
| 4589 | YPL188W | W | POS5  | 968  | 1188 | 0 |
| 4590 | YPL190C | C | NAB3  | 965  | 1781 | 0 |
| 4591 | YPL276W | W |       | 482  | 391  | 0 |
| 4592 | YPL278C | C |       | 470  | 418  | 0 |
| 4593 | YPL280W | W |       | 470  | 372  | 0 |
| 4594 | YPL282C | C |       | 640  | 592  | 0 |
| 4595 | YPR001W | W | CIT3  | 383  | 355  | 0 |
| 4596 | YPR003C | C |       | 588  | 627  | 0 |
| 4597 | YPR089W | W |       | 684  | 724  | 0 |
| 4598 | YPR091C | C |       | 974  | 1366 | 0 |
| 4599 | YPR093C | C |       | 486  | 552  | 0 |
| 4600 | YPR095C | C | SYT1  | 322  | 282  | 1 |
| 4601 | YPR097W | W |       | 502  | 628  | 0 |
| 4602 | YPR099C | C |       | 448  | 586  | 0 |
| 4603 | YPR185W | W | APG13 | 691  | 898  | 0 |
| 4604 | YPR187W | W | RP026 | 300  | 258  | 0 |
| 4605 | YPR189W | W | SKI3  | 329  | 280  | 0 |
| 4606 | YPR191W | W | QCR2  | 1713 | 1763 | 0 |
| 4607 | YPR193C | C | HPA2  | 389  | 318  | 0 |
| 4608 | YPR195C | C |       | 299  | 239  | 0 |
| 4609 | NORF 49 |   |       | 750  | 842  | 0 |
| 4610 | NORF 53 |   |       | 919  | 910  | 0 |
| 4611 | NORF 57 |   |       | 804  | 826  | 0 |
| 4612 | NORF 61 |   |       | 536  | 545  | 0 |
| 4613 | NORF 65 |   |       | 419  | 372  | 0 |
| 4614 | NORF 69 |   |       | 403  | 396  | 0 |
| 4615 | YCR074C |   |       | 682  | 795  | 0 |
| 4616 | YDL035C | C | GPR1  | 328  | 311  | 1 |
| 4617 | YDL074C | C | BRE1  | 1399 | 2084 | 0 |
| 4618 | YDL110C | C |       | 639  | 1059 | 0 |
| 4619 | YDL112W | W | TRM3  | 407  | 477  | 0 |
| 4620 | YDL144C | C |       | 923  | 1450 | 0 |
| 4621 | YHR023W | W | MY01  | 320  | 274  | 1 |
| 4622 | YHR039C | C | MSC7  | 299  | 268  | 0 |
| 4623 | YHR075C | C | PPE1  | 298  | 253  | 0 |
| 4624 | YHR077C | C | NMD2  | 299  | 255  | 2 |
| 4625 | YHR085W | W |       | 310  | 252  | 0 |
| 4626 | YHR165C | C | PRP8  | 281  | 209  | 2 |
| 4627 | YMR189W | W | GCV2  | 374  | 769  | 0 |

|      |                     |   |        |      |      |   |
|------|---------------------|---|--------|------|------|---|
| 4628 | YMR266W             | W | RSN1   | 2128 | 1852 | 2 |
| 4629 | YMR306W             | W | FKS3   | 385  | 335  | 0 |
| 4630 | YMR323W             | W |        | 450  | 346  | 2 |
| 4631 | YNL016W             | W | PUB1   | 3605 | 4772 | 2 |
| 4632 | YNL054W             | W | VAC7   | 841  | 908  | 2 |
| 4633 | EMPTY               |   |        | 394  | 772  | 0 |
| 4634 | EMPTY               |   |        | 346  | 314  | 0 |
| 4635 | EMPTY               |   |        | 327  | 279  | 0 |
| 4636 | EMPTY               |   |        | 346  | 324  | 0 |
| 4637 | EMPTY               |   |        | 329  | 284  | 0 |
| 4638 | EMPTY               |   |        | 305  | 255  | 0 |
| 4639 | YAL035C- <i>f</i> C |   |        | 695  | 778  | 0 |
| 4640 | YEL076C- <i>f</i> C |   |        | 1945 | 1835 | 0 |
| 4641 | YAL069W             | W |        | 989  | 930  | 0 |
| 4642 | YJR094W- <i>f</i> W |   | RPL43B | 1914 | 2281 | 0 |
| 4643 | YMR084W             | W |        | 399  | 344  | 0 |
| 4644 | YHR214W- <i>f</i> W |   |        | 956  | 1330 | 0 |
| 4645 | YOR008C- <i>f</i> C |   | KIM1   | 338  | 308  | 0 |
| 4646 | YHR005C- <i>f</i> C |   | MRS11  | 1084 | 1647 | 0 |
| 4647 | YHR039C- <i>f</i> C |   | VMA10  | 1572 | 2537 | 0 |
| 4648 | YLR312W- <i>f</i> W |   | MRPL15 | 653  | 873  | 0 |
| 4649 | EMPTY               |   |        | 315  | 266  | 0 |
| 4650 | EMPTY               |   |        | 310  | 262  | 0 |
| 4651 | YHR032W             | W |        | 300  | 233  | 1 |
| 4652 | YHR034C             | C |        | 168  | 128  | 1 |
| 4653 | YHR036W             | W |        | 287  | 211  | 1 |
| 4654 | YHR041C             | C | SRB2   | 312  | 258  | 1 |
| 4655 | YHR045W             | W |        | 380  | 325  | 0 |
| 4656 | YIL013C             | C | PDR11  | 385  | 345  | 1 |
| 4657 | YMR153C- <i>f</i> C |   |        | 596  | 909  | 0 |
| 4658 | YMR172C- <i>f</i> C |   |        | 635  | 932  | 0 |
| 4659 | YMR193C- <i>f</i> C |   |        | 1128 | 1573 | 0 |
| 4660 | YMR201C             | C | RAD14  | 509  | 728  | 0 |
| 4661 | YMR244C- <i>f</i> C |   |        | 523  | 800  | 0 |
| 4662 | YMR290W- <i>f</i> W |   |        | 328  | 300  | 1 |
| 4663 | YML020W             | W |        | 595  | 779  | 0 |
| 4664 | YML097C             | C | VPS9   | 884  | 1258 | 0 |
| 4665 | YML130C             | C | ER01   | 1549 | 2120 | 2 |
| 4666 | YMR016C             | C | SOK2   | 1545 | 2576 | 2 |
| 4667 | YMR032W             | W | HOF1   | 565  | 665  | 0 |
| 4668 | YMR198W             | W | CIK1   | 627  | 692  | 2 |
| 4669 | NORF 110            |   |        | 317  | 309  | 0 |
| 4670 | EMPTY               |   |        | 302  | 266  | 0 |
| 4671 | EMPTY               |   |        | 307  | 287  | 0 |
| 4672 | EMPTY               |   |        | 316  | 273  | 0 |
| 4673 | EMPTY               |   |        | 276  | 247  | 0 |
| 4674 | EMPTY               |   |        | 283  | 242  | 0 |
| 4675 | EMPTY               |   |        | 293  | 230  | 0 |
| 4676 | EMPTY               |   |        | 296  | 225  | 0 |
| 4677 | EMPTY               |   |        | 310  | 286  | 0 |
| 4678 | EMPTY               |   |        | 284  | 207  | 0 |
| 4679 | EMPTY               |   |        | 304  | 229  | 0 |

|      |         |   |      |     |     |   |
|------|---------|---|------|-----|-----|---|
| 4680 | EMPTY   |   |      | 309 | 254 | 0 |
| 4681 | YDL227C | C | HO   | 338 | 297 | 1 |
| 4682 | YDL229W | W | SSB1 | 340 | 283 | 1 |
| 4683 | YDL239C | C | ADY3 | 318 | 274 | 1 |
| 4684 | YDR011W | W | SNQ2 | 320 | 283 | 1 |
| 4685 | YDR028C | C | REG1 | 338 | 280 | 1 |
| 4686 | YDR040C | C | ENA1 | 331 | 294 | 1 |
| 4687 | EMPTY   |   |      | 322 | 258 | 0 |
| 4688 | EMPTY   |   |      | 318 | 262 | 0 |
| 4689 | EMPTY   |   |      | 319 | 259 | 0 |
| 4690 | EMPTY   |   |      | 316 | 256 | 0 |
| 4691 | EMPTY   |   |      | 322 | 238 | 0 |
| 4692 | EMPTY   |   |      | 304 | 246 | 0 |
| 4693 | EMPTY   |   |      | 307 | 248 | 0 |
| 4694 | EMPTY   |   |      | 304 | 260 | 0 |
| 4695 | EMPTY   |   |      | 297 | 255 | 0 |
| 4696 | EMPTY   |   |      | 292 | 260 | 0 |
| 4697 | EMPTY   |   |      | 299 | 249 | 0 |
| 4698 | EMPTY   |   |      | 289 | 252 | 0 |
| 4699 | EMPTY   |   |      | 295 | 233 | 0 |
| 4700 | EMPTY   |   |      | 295 | 215 | 0 |
| 4701 | EMPTY   |   |      | 293 | 219 | 0 |
| 4702 | EMPTY   |   |      | 305 | 222 | 0 |
| 4703 | EMPTY   |   |      | 292 | 218 | 0 |
| 4704 | EMPTY   |   |      | 296 | 223 | 0 |
| 4705 | SS DNA  |   |      | 340 | 278 | 0 |
| 4706 | COT1    |   |      | 314 | 261 | 0 |
| 4707 | POLY A  |   |      | 324 | 256 | 0 |
| 4708 | PNCA    |   |      | 326 | 263 | 0 |
| 4709 | EMPTY   |   |      | 312 | 257 | 0 |
| 4710 | EMPTY   |   |      | 316 | 261 | 0 |
| 4711 | EMPTY   |   |      | 320 | 257 | 0 |
| 4712 | EMPTY   |   |      | 310 | 255 | 0 |
| 4713 | EMPTY   |   |      | 316 | 258 | 0 |
| 4714 | EMPTY   |   |      | 320 | 257 | 0 |
| 4715 | EMPTY   |   |      | 305 | 256 | 0 |
| 4716 | EMPTY   |   |      | 304 | 245 | 0 |
| 4717 | EMPTY   |   |      | 301 | 248 | 0 |
| 4718 | EMPTY   |   |      | 295 | 262 | 0 |
| 4719 | EMPTY   |   |      | 289 | 251 | 0 |
| 4720 | EMPTY   |   |      | 291 | 252 | 0 |
| 4721 | EMPTY   |   |      | 288 | 244 | 0 |
| 4722 | EMPTY   |   |      | 278 | 229 | 0 |
| 4723 | EMPTY   |   |      | 286 | 237 | 0 |
| 4724 | EMPTY   |   |      | 292 | 229 | 0 |
| 4725 | EMPTY   |   |      | 304 | 209 | 0 |
| 4726 | EMPTY   |   |      | 292 | 214 | 0 |
| 4727 | EMPTY   |   |      | 296 | 215 | 0 |
| 4728 | EMPTY   |   |      | 313 | 213 | 0 |
| 4729 | SS DNA  |   |      | 367 | 343 | 0 |
| 4730 | COT1    |   |      | 674 | 411 | 0 |
| 4731 | POLY A  |   |      | 336 | 322 | 0 |

|                              |       |  |      |      |   |
|------------------------------|-------|--|------|------|---|
| 4732 PNCA                    |       |  | 313  | 245  | 0 |
| 4733 EMPTY                   |       |  | 302  | 247  | 0 |
| 4734 EMPTY                   |       |  | 319  | 254  | 0 |
| 4735 EMPTY                   |       |  | 312  | 251  | 0 |
| 4736 EMPTY                   |       |  | 320  | 268  | 0 |
| 4737 EMPTY                   |       |  | 322  | 264  | 0 |
| 4738 EMPTY                   |       |  | 326  | 278  | 0 |
| 4739 EMPTY                   |       |  | 313  | 253  | 0 |
| 4740 EMPTY                   |       |  | 326  | 241  | 0 |
| 4741 EMPTY                   |       |  | 298  | 252  | 0 |
| 4742 EMPTY                   |       |  | 302  | 264  | 0 |
| 4743 EMPTY                   |       |  | 302  | 259  | 0 |
| 4744 EMPTY                   |       |  | 309  | 247  | 0 |
| 4745 EMPTY                   |       |  | 297  | 254  | 0 |
| 4746 EMPTY                   |       |  | 286  | 237  | 0 |
| 4747 EMPTY                   |       |  | 289  | 235  | 0 |
| 4748 EMPTY                   |       |  | 295  | 221  | 0 |
| 4749 EMPTY                   |       |  | 289  | 222  | 0 |
| 4750 EMPTY                   |       |  | 282  | 208  | 0 |
| 4751 EMPTY                   |       |  | 292  | 209  | 0 |
| 4752 EMPTY                   |       |  | 289  | 215  | 0 |
| 4753 YBR219C C               |       |  | 662  | 647  | 0 |
| 4754 YBR221C C               | PDB1  |  | 1661 | 2182 | 0 |
| 4755 YBR223C C               | TDP1  |  | 344  | 300  | 0 |
| 4756 YBR225W W               |       |  | 365  | 327  | 0 |
| 4757 YBR227C C               | MCX1  |  | 329  | 341  | 1 |
| 4758 YBR229C C               | ROT2  |  | 720  | 821  | 0 |
| 4759 YCL013W                 |       |  | 468  | 469  | 0 |
| 4760 YCL016C C               | DCC1  |  | 473  | 503  | 0 |
| 4761 YCL018W W               | LEU2  |  | 873  | 1061 | 0 |
| 4762 YCL020W W               |       |  | 4887 | 7083 | 0 |
| 4763 YCL022C C               |       |  | 493  | 574  | 0 |
| 4764 YCL024W W               | KCC4  |  | 385  | 379  | 0 |
| 4765 YCR024C C               |       |  | 318  | 249  | 0 |
| 4766 YCR025C C               |       |  | 302  | 250  | 0 |
| 4767 YCR027C C               | RSG1  |  | 639  | 588  | 0 |
| 4768 YCR029C                 |       |  | 384  | 350  | 0 |
| 4769 YCR030C C               |       |  | 1229 | 1102 | 0 |
| 4770 YCR032W W               | BPH1  |  | 263  | 209  | 1 |
| 4771 YCRX11W                 |       |  | 309  | 248  | 0 |
| 4772 YCR073W- <del>A</del> W | SOL2  |  | 737  | 878  | 0 |
| 4773 YCRX15W                 |       |  | 422  | 325  | 0 |
| 4774 YCRX17W                 |       |  | 1857 | 3544 | 0 |
| 4775 YCRX19W                 |       |  | 484  | 416  | 0 |
| 4776 YCRX21C                 |       |  | 551  | 550  | 0 |
| 4777 YDL086W W               |       |  | 593  | 811  | 0 |
| 4778 YDL088C C               | ASM4  |  | 387  | 400  | 0 |
| 4779 YDL090C C               | RAM1  |  | 428  | 452  | 0 |
| 4780 YDL092W W               | SRP14 |  | 684  | 843  | 0 |
| 4781 YDL094C C               |       |  | 369  | 306  | 0 |
| 4782 YDL096C C               |       |  | 1209 | 990  | 0 |
| 4783 YDL182W W               | LYS20 |  | 3357 | 3975 | 0 |

|      |         |   |        |      |      |   |
|------|---------|---|--------|------|------|---|
| 4784 | YDL184C | C | RPL41A | 1421 | 1514 | 0 |
| 4785 | YDL186W | W |        | 448  | 353  | 0 |
| 4786 | YDL188C | C | PPH22  | 1912 | 1991 | 0 |
| 4787 | YDL190C | C | UFD2   | 986  | 1116 | 0 |
| 4788 | YDL192W | W | ARF1   | 3816 | 4921 | 0 |
| 4789 | YDR030C | C | RAD28  | 287  | 226  | 2 |
| 4790 | YDR032C | C | PST2   | 935  | 2231 | 0 |
| 4791 | YDR034C | C | LYS14  | 123  | 86   | 0 |
| 4792 | YDR036C | C |        | 52   | 49   | 0 |
| 4793 | YDR038C | C | ENA5   | 427  | 387  | 0 |
| 4794 | YDR040C | C | ENA1   | 398  | 333  | 1 |
| 4795 | YDR126W | W | PSL10  | 485  | 369  | 0 |
| 4796 | YDR128W | W |        | 531  | 542  | 0 |
| 4797 | YDR130C | C | FIN1   | 618  | 567  | 0 |
| 4798 | YDR132C | C |        | 724  | 616  | 0 |
| 4799 | YDR134C | C |        | 6863 | 7080 | 0 |
| 4800 | YDR136C | C |        | 472  | 366  | 0 |
| 4801 | YDR222W | W |        | 843  | 1361 | 0 |
| 4802 | YDR224C | C | HTB1   | 4161 | 3226 | 0 |
| 4803 | YDR226W | W | ADK1   | 3489 | 4616 | 0 |
| 4804 | YDR228C | C | PCF11  | 906  | 1058 | 0 |
| 4805 | YDR230W | W |        | 596  | 518  | 0 |
| 4806 | YDR232W | W | HEM1   | 2120 | 1965 | 0 |
| 4807 | YDR318W | W | MCM21  | 534  | 500  | 0 |
| 4808 | YDR320C | C | SWA2   | 710  | 802  | 0 |
| 4809 | YDR322W | W | MRPL35 | 899  | 963  | 0 |
| 4810 | YDR324C | C |        | 591  | 721  | 0 |
| 4811 | YDR326C | C |        | 407  | 366  | 0 |
| 4812 | YDR328C | C | SKP1   | 1242 | 1807 | 0 |
| 4813 | YDR414C | C | ERD1   | 913  | 808  | 0 |
| 4814 | YDR416W | W | SYF1   | 486  | 526  | 0 |
| 4815 | YDR418W | W | RPL12B | 6635 | 6981 | 0 |
| 4816 | YDR420W | W | HKR1   | 606  | 574  | 2 |
| 4817 | YDR422C | C | SIP1   | 776  | 779  | 0 |
| 4818 | YDR424C | C | DYN2   | 198  | 198  | 0 |
| 4819 | YDR510W | W | SMT3   | 59   | 74   | 0 |
| 4820 | YDR512C | C |        | 299  | 398  | 0 |
| 4821 | YDR514C | C |        | 501  | 594  | 0 |
| 4822 | YDR516C | C |        | 1181 | 784  | 0 |
| 4823 | YDR518W | W | EUG1   | 1564 | 1574 | 0 |
| 4824 | YDR520C | C |        | 507  | 492  | 0 |
| 4825 | YAL063C | C | FL09   | 337  | 246  | 1 |
| 4826 | YAL065C | C |        | 404  | 342  | 1 |
| 4827 | YAL067C | C | SE01   | 293  | 217  | 0 |
| 4828 | YAR002W | W | NUP60  | 471  | 541  | 0 |
| 4829 | YAR007C | C | RFA1   | 341  | 343  | 0 |
| 4830 | YAR009C | C |        | 344  | 297  | 1 |
| 4831 | YBL051C | C | PIN4   | 880  | 1021 | 0 |
| 4832 | YBL053W | W |        | 350  | 336  | 0 |
| 4833 | YBL055C | C |        | 608  | 706  | 0 |
| 4834 | YBL057C | C |        | 868  | 1034 | 0 |
| 4835 | YBL059W | W |        | 406  | 402  | 0 |

|      |         |   |       |      |      |   |
|------|---------|---|-------|------|------|---|
| 4836 | YBL061C | C | SKT5  | 448  | 623  | 0 |
| 4837 | YBR030W | W |       | 416  | 434  | 0 |
| 4838 | YBR032W | W |       | 362  | 305  | 0 |
| 4839 | YBR034C | C | HMT1  | 1185 | 1704 | 0 |
| 4840 | YBR036C | C | CSG2  | 1115 | 1205 | 0 |
| 4841 | YBR038W | W | CHS2  | 274  | 227  | 1 |
| 4842 | YBR040W | W | FIG1  | 370  | 360  | 0 |
| 4843 | YBR124W | W |       | 460  | 348  | 0 |
| 4844 | YBR126C | C | TPS1  | 3340 | 3436 | 0 |
| 4845 | YBR128C | C | APG14 | 582  | 529  | 2 |
| 4846 | YBR130C | C | SHE3  | 948  | 1243 | 2 |
| 4847 | YBR132C | C | AGP2  | 510  | 508  | 0 |
| 4848 | YBR134W | W |       | 600  | 494  | 0 |
| 4849 | YEL060C | C | PRB1  | 498  | 782  | 0 |
| 4850 | YEL062W | W | NPR2  | 344  | 296  | 0 |
| 4851 | YEL064C | C |       | 329  | 254  | 0 |
| 4852 | YEL066W | W | HPA3  | 522  | 692  | 0 |
| 4853 | YEL068C | C |       | 414  | 430  | 0 |
| 4854 | YEL070W | W |       | 376  | 254  | 0 |
| 4855 | YER076C | C |       | 534  | 478  | 0 |
| 4856 | YER078C | C |       | 638  | 640  | 0 |
| 4857 | YER080W | W |       | 915  | 1531 | 0 |
| 4858 | YER082C | C | KRE31 | 1038 | 1528 | 0 |
| 4859 | YER084W | W |       | 346  | 253  | 0 |
| 4860 | YER086W | W | ILV1  | 2305 | 2003 | 0 |
| 4861 | YER171W | W | RAD3  | 715  | 793  | 0 |
| 4862 | YER173W | W | RAD24 | 618  | 653  | 0 |
| 4863 | YER175C | C | TMT1  | 559  | 620  | 0 |
| 4864 | YER177W | W | BMH1  | 4748 | 9014 | 0 |
| 4865 | YER179W | W | DMC1  | 392  | 353  | 0 |
| 4866 | YER181C | C |       | 358  | 343  | 0 |
| 4867 | YFR006W | W |       | 1488 | 1669 | 0 |
| 4868 | YFR008W | W |       | 744  | 908  | 0 |
| 4869 | YFR010W | W | UBP6  | 1747 | 2567 | 0 |
| 4870 | YFR012W | W |       | 415  | 344  | 0 |
| 4871 | YFR014C | C | CMK1  | 803  | 828  | 0 |
| 4872 | YFR016C | C |       | 2207 | 2179 | 0 |
| 4873 | YGL044C | C | RNA15 | 844  | 964  | 0 |
| 4874 | YGL046W | W |       | 478  | 438  | 0 |
| 4875 | YGL048C | C | RPT6  | 1870 | 3146 | 0 |
| 4876 | YGL050W | W |       | 643  | 709  | 0 |
| 4877 | YGL052W | W |       | 515  | 500  | 0 |
| 4878 | YGL054C | C | ERV14 | 1110 | 1160 | 0 |
| 4879 | YGL140C | C |       | 331  | 269  | 1 |
| 4880 | YGL142C | C | GPI10 | 786  | 766  | 0 |
| 4881 | YGL144C | C |       | 405  | 408  | 0 |
| 4882 | YGL146C | C |       | 381  | 322  | 0 |
| 4883 | YGL148W | W | ARO2  | 2271 | 2218 | 0 |
| 4884 | YGL150C | C | INO80 | 628  | 769  | 0 |
| 4885 | YGL236C | C | MT01  | 513  | 540  | 0 |
| 4886 | YGL238W | W | CSE1  | 1214 | 1138 | 0 |
| 4887 | YGL240W | W | DOC1  | 486  | 379  | 0 |

|      |         |   |        |      |      |   |
|------|---------|---|--------|------|------|---|
| 4888 | YGL242C | C |        | 1025 | 1527 | 0 |
| 4889 | YGL244W | W | RTF1   | 2560 | 2781 | 0 |
| 4890 | YGL246C | C | RAI1   | 804  | 991  | 0 |
| 4891 | YGR069W | W |        | 347  | 262  | 0 |
| 4892 | YGR071C | C |        | 437  | 372  | 1 |
| 4893 | YGR073C | C |        | 553  | 487  | 1 |
| 4894 | YGR075C | C | PRP38  | 609  | 590  | 0 |
| 4895 | YGR077C | C | PEX8   | 773  | 724  | 0 |
| 4896 | YGR079W | W |        | 808  | 1216 | 0 |
| 4897 | YGR165W | W |        | 635  | 768  | 0 |
| 4898 | YGR167W | W | CLC1   | 1689 | 2965 | 0 |
| 4899 | YGR169C | C | PUS6   | 474  | 493  | 0 |
| 4900 | YGR171C | C | MSM1   | 486  | 521  | 0 |
| 4901 | YGR173W | W |        | 1067 | 1499 | 0 |
| 4902 | YGR175C | C | ERG1   | 1929 | 2146 | 0 |
| 4903 | YGR261C | C | APL6   | 903  | 1208 | 0 |
| 4904 | YGR263C | C |        | 561  | 588  | 0 |
| 4905 | YGR265W | W |        | 1122 | 869  | 0 |
| 4906 | YGR267C | C | FOL2   | 1160 | 1423 | 0 |
| 4907 | YGR269W | W |        | 376  | 325  | 0 |
| 4908 | YGR271W | W | SLH1   | 303  | 224  | 2 |
| 4909 | YHR011W | W | DIA4   | 334  | 328  | 0 |
| 4910 | YHR013C | C | ARD1   | 1038 | 1466 | 0 |
| 4911 | YHR015W | W | MIP6   | 297  | 254  | 0 |
| 4912 | YHR017W | W | YSC83  | 653  | 654  | 0 |
| 4913 | YHR019C | C | DED81  | 4742 | 3799 | 0 |
| 4914 | YHR021C | C | RPS27B | 729  | 790  | 0 |
| 4915 | YHR105W | W |        | 411  | 372  | 0 |
| 4916 | YHR107C | C | CDC12  | 1360 | 1713 | 0 |
| 4917 | YHR109W | W | CTM1   | 469  | 456  | 0 |
| 4918 | YHR111W | W |        | 625  | 851  | 0 |
| 4919 | YHR113W | W |        | 927  | 1239 | 0 |
| 4920 | YHR115C | C |        | 958  | 1085 | 0 |
| 4921 | YHR200W | W | RPN10  | 1545 | 2186 | 0 |
| 4922 | YHR202W | W |        | 1491 | 1950 | 0 |
| 4923 | YHR204W | W | MNL1   | 1058 | 934  | 0 |
| 4924 | YHR206W | W | SKN7   | 982  | 1061 | 0 |
| 4925 | YHR208W | W | BAT1   | 2191 | 1885 | 0 |
| 4926 | YHR210C | C |        | 369  | 306  | 0 |
| 4927 | YIL077C | C |        | 548  | 508  | 0 |
| 4928 | YIL079C | C |        | 739  | 984  | 0 |
| 4929 | YIL082W | W |        | 1373 | 1902 | 0 |
| 4930 | YIL084C | C | SDS3   | 599  | 635  | 0 |
| 4931 | YIL086C | C |        | 318  | 261  | 0 |
| 4932 | YIL088C | C |        | 482  | 509  | 0 |
| 4933 | YIL174W | W |        | 435  | 342  | 0 |
| 4934 | YIL176C | C |        | 867  | 777  | 0 |
| 4935 | YIR001C | C | SGN1   | 688  | 820  | 0 |
| 4936 | YIR003W | W |        | 743  | 971  | 0 |
| 4937 | YIR005W | W | IST3   | 403  | 403  | 0 |
| 4938 | YIR007W | W |        | 483  | 527  | 0 |
| 4939 | YJL050W | W | MTR4   | 425  | 445  | 1 |

|      |         |   |        |      |      |   |
|------|---------|---|--------|------|------|---|
| 4940 | YJL052W | W | TDH1   | 3210 | 5460 | 0 |
| 4941 | YJL054W | W | TIM54  | 305  | 317  | 1 |
| 4942 | YJL056C | C | ZAP1   | 298  | 286  | 0 |
| 4943 | YJL058C | C |        | 436  | 469  | 0 |
| 4944 | YJL060W | W |        | 306  | 255  | 1 |
| 4945 | YJL146W | W | IDS2   | 466  | 551  | 0 |
| 4946 | YJL148W | W | RPA34  | 2169 | 3559 | 0 |
| 4947 | YJL150W | W |        | 308  | 233  | 0 |
| 4948 | YJL152W | W |        | 808  | 998  | 0 |
| 4949 | YJL154C | C | VPS35  | 639  | 802  | 0 |
| 4950 | YJL156C | C | SSY5   | 726  | 778  | 0 |
| 4951 | YJR017C | C | ESS1   | 1068 | 1413 | 0 |
| 4952 | YJR019C | C | TES1   | 505  | 467  | 0 |
| 4953 | YJR021C | C | REC107 | 497  | 487  | 0 |
| 4954 | YJR023C | C |        | 450  | 455  | 0 |
| 4955 | YJR025C | C | BNA1   | 534  | 845  | 0 |
| 4956 | YJR027W | W |        | 3877 | 5669 | 0 |
| 4957 | YJR114W | W |        | 555  | 707  | 0 |
| 4958 | YJR116W | W |        | 613  | 565  | 0 |
| 4959 | YJR118C | C | ILM1   | 950  | 932  | 0 |
| 4960 | YJR120W | W |        | 271  | 232  | 1 |
| 4961 | YJR122W | W | CAF17  | 520  | 554  | 0 |
| 4962 | YJR124C | C |        | 915  | 870  | 0 |
| 4963 | YKL047W | W |        | 465  | 526  | 0 |
| 4964 | YKL049C | C | CSE4   | 450  | 542  | 0 |
| 4965 | YKL051W | W |        | 694  | 861  | 0 |
| 4966 | YKL053W | W |        | 463  | 553  | 0 |
| 4967 | YKL055C | C | OAR1   | 428  | 431  | 0 |
| 4968 | YKL057C | C | NUP120 | 659  | 626  | 0 |
| 4969 | YKL142W | W | MRP8   | 940  | 1954 | 0 |
| 4970 | YKL144C | C | RPC25  | 709  | 907  | 0 |
| 4971 | YKL146W | W |        | 770  | 751  | 0 |
| 4972 | YKL148C | C | SDH1   | 902  | 703  | 0 |
| 4973 | YKL150W | W | MCR1   | 1189 | 1687 | 0 |
| 4974 | YKL152C | C | GPM1   | 4142 | 7122 | 0 |
| 4975 | YKR013W | W | PRY2   | 2749 | 4409 | 0 |
| 4976 | YKR015C | C |        | 419  | 344  | 0 |
| 4977 | YKR017C | C |        | 427  | 369  | 0 |
| 4978 | YKR019C | C | IRS4   | 594  | 659  | 0 |
| 4979 | YKR021W | W |        | 444  | 460  | 0 |
| 4980 | YKR023W | W |        | 647  | 763  | 0 |
| 4981 | YLL003W | W | SFI1   | 435  | 426  | 0 |
| 4982 | YLL005C | C | SP075  | 424  | 425  | 0 |
| 4983 | YLL007C | C |        | 283  | 220  | 1 |
| 4984 | YLL009C | C | COX17  | 475  | 712  | 0 |
| 4985 | YLL011W | W | SOF1   | 500  | 716  | 0 |
| 4986 | YLL013C | C | PUF3   | 421  | 414  | 0 |
| 4987 | YLR032W | W | RAD5   | 390  | 434  | 0 |
| 4988 | YLR034C | C | SMF3   | 1100 | 1170 | 0 |
| 4989 | YLR036C | C |        | 529  | 536  | 0 |
| 4990 | YLR038C | C | COX12  | 796  | 843  | 0 |
| 4991 | YLR040C | C |        | 520  | 555  | 0 |

|      |         |   |        |      |      |   |
|------|---------|---|--------|------|------|---|
| 4992 | YLR042C | C |        | 896  | 1241 | 0 |
| 4993 | YLR128W | W |        | 391  | 449  | 0 |
| 4994 | YLR130C | C | ZRT2   | 952  | 962  | 0 |
| 4995 | YLR132C | C |        | 336  | 299  | 0 |
| 4996 | YLR134W | W | PDC5   | 542  | 428  | 2 |
| 4997 | YLR136C | C | TIS11  | 282  | 254  | 0 |
| 4998 | YLR138W | W | NHA1   | 395  | 398  | 0 |
| 4999 | YLR224W | W |        | 809  | 979  | 0 |
| 5000 | YLR226W | W | BUR2   | 583  | 775  | 0 |
| 5001 | YLR228C | C | ECM22  | 507  | 375  | 0 |
| 5002 | YLR230W | W |        | 918  | 912  | 0 |
| 5003 | YLR232W | W |        | 534  | 568  | 0 |
| 5004 | YLR234W | W | TOP3   | 516  | 492  | 0 |
| 5005 | YLR320W | W |        | 347  | 345  | 0 |
| 5006 | YLR322W | W |        | 485  | 517  | 0 |
| 5007 | YLR324W | W |        | 713  | 805  | 0 |
| 5008 | YLR326W | W |        | 449  | 514  | 0 |
| 5009 | YLR328W | W |        | 1027 | 1115 | 0 |
| 5010 | YLR330W | W | CHS5   | 8249 | 6698 | 0 |
| 5011 | YLR416C | C |        | 332  | 235  | 0 |
| 5012 | YLR418C | C | CDC73  | 676  | 873  | 0 |
| 5013 | YLR420W | W | URA4   | 2429 | 1894 | 0 |
| 5014 | YLR422W | W |        | 317  | 258  | 1 |
| 5015 | YLR424W | W |        | 466  | 403  | 0 |
| 5016 | YLR426W | W |        | 547  | 547  | 0 |
| 5017 | YML054C | C | CYB2   | 381  | 338  | 0 |
| 5018 | YML057W | W | CMP2   | 574  | 644  | 0 |
| 5019 | YML059C | C |        | 318  | 257  | 0 |
| 5020 | YML061C | C | PIF1   | 307  | 256  | 0 |
| 5021 | YML063W | W | RPS1B  | 3066 | 3588 | 0 |
| 5022 | YML065W | W | ORC1   | 321  | 273  | 0 |
| 5023 | YMR026C | C | PEX12  | 627  | 758  | 0 |
| 5024 | YMR028W | W | TAP42  | 491  | 589  | 0 |
| 5025 | YMR030W | W |        | 444  | 445  | 0 |
| 5026 | YMR032W | W | HOF1   | 525  | 545  | 0 |
| 5027 | YMR035W | W | IMP2   | 540  | 572  | 0 |
| 5028 | YMR037C | C | MSN2   | 1234 | 1348 | 0 |
| 5029 | YMR121C | C | RPL15B | 4298 | 4628 | 0 |
| 5030 | YMR123W | W | PKR1   | 899  | 969  | 0 |
| 5031 | YMR125W | W | STO1   | 873  | 1021 | 0 |
| 5032 | YMR127C | C | SAS2   | 533  | 599  | 0 |
| 5033 | YMR129W | W | POM152 | 696  | 674  | 0 |
| 5034 | YMR131C | C | RRB1   | 1426 | 2954 | 0 |
| 5035 | YMR239C | C | RNT1   | 586  | 816  | 0 |
| 5036 | YMR241W | W | YHM2   | 1781 | 1950 | 0 |
| 5037 | YMR243C | C | ZRC1   | 2407 | 2466 | 0 |
| 5038 | YMR245W | W |        | 454  | 587  | 0 |
| 5039 | YMR247C | C |        | 429  | 347  | 0 |
| 5040 | YMR251W | W |        | 380  | 291  | 0 |
| 5041 | YNL017C | C |        | 349  | 270  | 0 |
| 5042 | YNL019C | C |        | 524  | 482  | 0 |
| 5043 | YNL021W | W | HDA1   | 702  | 854  | 0 |

|      |         |   |       |      |      |   |
|------|---------|---|-------|------|------|---|
| 5044 | YNL023C | C | FAP1  | 526  | 657  | 0 |
| 5045 | YNL025C | C | SSN8  | 550  | 446  | 0 |
| 5046 | YNL027W | W | CRZ1  | 732  | 911  | 0 |
| 5047 | YNL113W | W | RPC19 | 788  | 1337 | 0 |
| 5048 | YNL115C | C |       | 568  | 828  | 0 |
| 5049 | YNL117W | W | MLS1  | 332  | 268  | 0 |
| 5050 | YNL119W | W |       | 3850 | 3841 | 0 |
| 5051 | YNL121C | C | TOM70 | 447  | 550  | 1 |
| 5052 | YNL123W | W |       | 1072 | 1375 | 0 |
| 5053 | YNL209W | W | SSB2  | 3140 | 2279 | 0 |
| 5054 | YNL211C | C |       | 377  | 333  | 0 |
| 5055 | YNL213C | C |       | 400  | 460  | 0 |
| 5056 | YNL215W | W | IES2  | 555  | 830  | 0 |
| 5057 | YNL217W | W |       | 669  | 639  | 0 |
| 5058 | YNL219C | C | ALG9  | 836  | 821  | 0 |
| 5059 | YNL305C | C |       | 722  | 857  | 0 |
| 5060 | YNL307C | C | MCK1  | 1755 | 1816 | 0 |
| 5061 | YNL309W | W | STB1  | 519  | 599  | 0 |
| 5062 | YNL311C | C |       | 285  | 276  | 0 |
| 5063 | YNL313C | C |       | 640  | 829  | 0 |
| 5064 | YNL315C | C | ATP11 | 745  | 907  | 0 |
| 5065 | YNR062C | C |       | 424  | 399  | 0 |
| 5066 | YNR064C | C |       | 360  | 357  | 0 |
| 5067 | YNR066C | C |       | 333  | 262  | 0 |
| 5068 | YNR068C | C |       | 276  | 210  | 1 |
| 5069 | YNR070W | W |       | 285  | 210  | 1 |
| 5070 | YNR072W | W | HXT17 | 483  | 390  | 0 |
| 5071 | YOL080C | C | REX4  | 597  | 786  | 0 |
| 5072 | YOL082W | W | CVT19 | 687  | 957  | 0 |
| 5073 | YOL084W | W | PHM7  | 334  | 313  | 0 |
| 5074 | YOL086C | C | ADH1  | 4774 | 7183 | 0 |
| 5075 | YOL088C | C | MPD2  | 893  | 1163 | 0 |
| 5076 | YOL090W | W | MSH2  | 725  | 940  | 0 |
| 5077 | YOR010C | C | TIR2  | 465  | 356  | 0 |
| 5078 | YOR012W | W |       | 252  | 195  | 1 |
| 5079 | YOR014W | W | RTS1  | 1253 | 1281 | 0 |
| 5080 | YOR016C | C | ERP4  | 263  | 222  | 1 |
| 5081 | YOR018W | W | ROD1  | 484  | 491  | 0 |
| 5082 | YOR020C | C | HSP10 | 1003 | 2360 | 0 |
| 5083 | YOR106W | W | VAM3  | 531  | 615  | 0 |
| 5084 | YOR108W | W |       | 2812 | 3005 | 0 |
| 5085 | YOR110W | W | TFC7  | 261  | 229  | 1 |
| 5086 | YOR112W | W |       | 654  | 683  | 0 |
| 5087 | YOR114W | W |       | 384  | 358  | 0 |
| 5088 | YOR116C | C | RP031 | 361  | 278  | 1 |
| 5089 | YOR202W | W | HIS3  | 861  | 1149 | 0 |
| 5090 | YOR204W | W | DED1  | 2834 | 2493 | 0 |
| 5091 | YOR206W | W | NOC2  | 1464 | 2186 | 0 |
| 5092 | YOR208W | W | PTP2  | 646  | 718  | 0 |
| 5093 | YOR210W | W | RPB10 | 785  | 1026 | 0 |
| 5094 | YOR212W | W | STE4  | 1202 | 1451 | 0 |
| 5095 | YOR298W | W |       | 548  | 454  | 0 |

|      |         |   |        |      |      |   |
|------|---------|---|--------|------|------|---|
| 5096 | YOR300W | W |        | 461  | 458  | 0 |
| 5097 | YOR302W | W |        | 345  | 398  | 0 |
| 5098 | YOR304W | W | ISW2   | 669  | 884  | 0 |
| 5099 | YOR306C | C |        | 591  | 604  | 0 |
| 5100 | YOR308C | C | SNU66  | 639  | 726  | 0 |
| 5101 | YOR394W | W |        | 335  | 269  | 0 |
| 5102 | YPL002C | C | SNF8   | 459  | 511  | 0 |
| 5103 | YPL004C | C |        | 1612 | 2790 | 0 |
| 5104 | YPL006W | W | NCR1   | 258  | 206  | 1 |
| 5105 | YPL008W | W | CHL1   | 263  | 221  | 1 |
| 5106 | YPL010W | W | RET3   | 870  | 1064 | 0 |
| 5107 | YPL096W | W | PNG1   | 413  | 514  | 0 |
| 5108 | YPL098C | C |        | 672  | 833  | 0 |
| 5109 | YPL100W | W |        | 277  | 212  | 1 |
| 5110 | YPL102C | C | KRE24  | 295  | 262  | 1 |
| 5111 | YPL104W | W | MSD1   | 421  | 463  | 0 |
| 5112 | YPL106C | C | SSE1   | 1968 | 3415 | 0 |
| 5113 | YPL192C | C | PRM3   | 462  | 468  | 0 |
| 5114 | YPL194W | W | DDC1   | 439  | 449  | 0 |
| 5115 | YPL196W | W | OXR1   | 573  | 632  | 0 |
| 5116 | YPL198W | W | RPL7B  | 2233 | 2630 | 0 |
| 5117 | YPL200W | W | CSM4   | 312  | 230  | 0 |
| 5118 | YPL202C | C | AFT2   | 534  | 726  | 0 |
| 5119 | YPR005C | C | HAL1   | 412  | 332  | 0 |
| 5120 | YPR007C | C | SPO69  | 305  | 240  | 0 |
| 5121 | YPR009W | W | SUT2   | 724  | 691  | 0 |
| 5122 | YPR011C | C |        | 536  | 535  | 0 |
| 5123 | YPR013C | C |        | 688  | 694  | 0 |
| 5124 | YPR015C | C |        | 330  | 264  | 0 |
| 5125 | YPR101W | W | SNT309 | 632  | 725  | 0 |
| 5126 | YPR103W | W | PRE2   | 1416 | 2217 | 0 |
| 5127 | YPR105C | C | COD1   | 418  | 493  | 0 |
| 5128 | YPR107C | C | YTH1   | 569  | 605  | 0 |
| 5129 | YPR109W | W |        | 577  | 628  | 0 |
| 5130 | YPR111W | W | DBF20  | 440  | 471  | 0 |
| 5131 | YPR197C | C |        | 544  | 537  | 0 |
| 5132 | YPR199C | C | ARR1   | 599  | 676  | 0 |
| 5133 | YPR201W | W | ARR3   | 355  | 302  | 0 |
| 5134 | YPR203W | W |        | 1129 | 1040 | 0 |
| 5135 | EMPTY   |   |        | 289  | 239  | 0 |
| 5136 | EMPTY   |   |        | 254  | 212  | 0 |
| 5137 | NORF 50 |   |        | 1277 | 2086 | 0 |
| 5138 | NORF 54 |   |        | 289  | 241  | 1 |
| 5139 | NORF 58 |   |        | 331  | 307  | 1 |
| 5140 | NORF 62 |   |        | 311  | 299  | 1 |
| 5141 | NORF 66 |   |        | 292  | 227  | 0 |
| 5142 | NORF 70 |   |        | 320  | 263  | 0 |
| 5143 | YDL171C | C | GLT1   | 1093 | 892  | 1 |
| 5144 | YDL177C | C |        | 428  | 448  | 0 |
| 5145 | YDL183C | C |        | 407  | 372  | 0 |
| 5146 | YDL215C | C | GDH2   | 417  | 454  | 0 |
| 5147 | YDL243C | C | AAD4   | 720  | 728  | 0 |

|      |                     |   |        |      |      |   |
|------|---------------------|---|--------|------|------|---|
| 5148 | YDR070C             | C |        | 368  | 785  | 0 |
| 5149 | YIL055C             | C |        | 475  | 584  | 0 |
| 5150 | YIL068C             | C | SEC6   | 674  | 776  | 0 |
| 5151 | YIL086C             | C |        | 2014 | 1200 | 0 |
| 5152 | YIL115C             | C | NUP159 | 964  | 920  | 2 |
| 5153 | YIL126W             | W | STH1   | 304  | 266  | 1 |
| 5154 | YIL151C             | C |        | 731  | 781  | 2 |
| 5155 | YNL077W             | W |        | 333  | 300  | 0 |
| 5156 | YNL163C             | C | RIA1   | 725  | 960  | 2 |
| 5157 | YNL222W             | W | SSU72  | 464  | 472  | 0 |
| 5158 | YNL262W             | W | POL2   | 674  | 681  | 1 |
| 5159 | YNL289W             | W | PCL1   | 711  | 922  | 0 |
| 5160 | YNR016C             | C | ACC1   | 378  | 323  | 1 |
| 5161 | EMPTY               |   |        | 282  | 233  | 0 |
| 5162 | EMPTY               |   |        | 284  | 222  | 0 |
| 5163 | EMPTY               |   |        | 281  | 221  | 0 |
| 5164 | EMPTY               |   |        | 280  | 228  | 0 |
| 5165 | EMPTY               |   |        | 425  | 429  | 0 |
| 5166 | EMPTY               |   |        | 302  | 260  | 0 |
| 5167 | YFL034C- <i>A</i> C |   | RPL22B | 1050 | 1333 | 0 |
| 5168 | YER119C- <i>A</i> C |   |        | 938  | 1021 | 0 |
| 5169 | YMR166C             | C |        | 458  | 499  | 0 |
| 5170 | YIL074C             | C | SER33  | 1001 | 1400 | 0 |
| 5171 | YAL064W- <i>E</i> W |   |        | 386  | 336  | 0 |
| 5172 | YAL064C- <i>A</i> C |   |        | 309  | 269  | 0 |
| 5173 | EMPTY               |   |        | 263  | 195  | 0 |
| 5174 | EMPTY               |   |        | 256  | 196  | 0 |
| 5175 | EMPTY               |   |        | 263  | 209  | 0 |
| 5176 | EMPTY               |   |        | 272  | 232  | 0 |
| 5177 | EMPTY               |   |        | 264  | 212  | 0 |
| 5178 | EMPTY               |   |        | 300  | 222  | 0 |
| 5179 | YIL173W             | W | VTH1   | 485  | 446  | 0 |
| 5180 | YJL158C             | C | CIS3   | 3451 | 4310 | 0 |
| 5181 | YJR029W             | W |        | 2178 | 3395 | 0 |
| 5182 | YKL215C             | C |        | 324  | 289  | 0 |
| 5183 | YLL034C             | C |        | 438  | 457  | 0 |
| 5184 | YLR024C             | C | UBR2   | 305  | 241  | 0 |
| 5185 | YMR294W- <i>A</i> W |   |        | 855  | 1022 | 0 |
| 5186 | YMR306C- <i>A</i> C |   |        | 395  | 343  | 0 |
| 5187 | YMR316C- <i>E</i> C |   |        | 462  | 401  | 0 |
| 5188 | YNL338W             | W |        | 1057 | 880  | 1 |
| 5189 | YPL006W             | W | NCR1   | 346  | 323  | 0 |
| 5190 | YPL047W             | W |        | 311  | 261  | 0 |
| 5191 | YMR207C             | C | HFA1   | 264  | 196  | 1 |
| 5192 | YMR319C             | C | FET4   | 420  | 336  | 1 |
| 5193 | YNL044W             | W | YIP3   | 837  | 784  | 0 |
| 5194 | YNL232W             | W | CSL4   | 265  | 203  | 1 |
| 5195 | YNL244C             | C | SUI1   | 267  | 199  | 1 |
| 5196 | YNR021W             | W |        | 1911 | 1961 | 0 |
| 5197 | EMPTY               |   |        | 278  | 222  | 0 |
| 5198 | EMPTY               |   |        | 254  | 205  | 0 |
| 5199 | EMPTY               |   |        | 273  | 211  | 0 |

|      |         |   |       |     |      |   |
|------|---------|---|-------|-----|------|---|
| 5200 | EMPTY   |   |       | 262 | 194  | 0 |
| 5201 | EMPTY   |   |       | 264 | 207  | 0 |
| 5202 | EMPTY   |   |       | 272 | 216  | 0 |
| 5203 | EMPTY   |   |       | 262 | 207  | 0 |
| 5204 | EMPTY   |   |       | 265 | 217  | 0 |
| 5205 | EMPTY   |   |       | 358 | 224  | 0 |
| 5206 | EMPTY   |   |       | 328 | 230  | 0 |
| 5207 | EMPTY   |   |       | 272 | 199  | 0 |
| 5208 | EMPTY   |   |       | 346 | 203  | 0 |
| 5209 | YDR271C | C |       | 490 | 516  | 0 |
| 5210 | YEL025C | C | SRI1  | 382 | 361  | 0 |
| 5211 | YEL055C | C | POL5  | 908 | 1117 | 0 |
| 5212 | YER002W | W | NOP16 | 894 | 1467 | 0 |
| 5213 | YER144C | C | UBP5  | 396 | 414  | 0 |
| 5214 | YFL-TYA |   |       | 321 | 308  | 1 |
| 5215 | EMPTY   |   |       | 279 | 213  | 0 |
| 5216 | EMPTY   |   |       | 277 | 201  | 0 |
| 5217 | EMPTY   |   |       | 275 | 207  | 0 |
| 5218 | EMPTY   |   |       | 257 | 201  | 0 |
| 5219 | EMPTY   |   |       | 264 | 214  | 0 |
| 5220 | EMPTY   |   |       | 274 | 215  | 0 |
| 5221 | EMPTY   |   |       | 279 | 204  | 0 |
| 5222 | EMPTY   |   |       | 270 | 216  | 0 |
| 5223 | EMPTY   |   |       | 269 | 205  | 0 |
| 5224 | EMPTY   |   |       | 270 | 208  | 0 |
| 5225 | EMPTY   |   |       | 260 | 208  | 0 |
| 5226 | EMPTY   |   |       | 270 | 211  | 0 |
| 5227 | EMPTY   |   |       | 266 | 209  | 0 |
| 5228 | EMPTY   |   |       | 325 | 227  | 0 |
| 5229 | EMPTY   |   |       | 297 | 241  | 0 |
| 5230 | EMPTY   |   |       | 283 | 208  | 0 |
| 5231 | EMPTY   |   |       | 264 | 204  | 0 |
| 5232 | EMPTY   |   |       | 283 | 198  | 0 |
| 5233 | SS DNA  |   |       | 295 | 221  | 0 |
| 5234 | 3XSSC   |   |       | 294 | 219  | 0 |
| 5235 | 3XSSC   |   |       | 284 | 213  | 0 |
| 5236 | 3XSSC   |   |       | 273 | 209  | 0 |
| 5237 | EMPTY   |   |       | 272 | 213  | 0 |
| 5238 | EMPTY   |   |       | 271 | 197  | 0 |
| 5239 | EMPTY   |   |       | 288 | 209  | 0 |
| 5240 | EMPTY   |   |       | 286 | 246  | 0 |
| 5241 | EMPTY   |   |       | 272 | 200  | 0 |
| 5242 | EMPTY   |   |       | 267 | 204  | 0 |
| 5243 | EMPTY   |   |       | 267 | 205  | 0 |
| 5244 | EMPTY   |   |       | 275 | 210  | 0 |
| 5245 | EMPTY   |   |       | 278 | 213  | 0 |
| 5246 | EMPTY   |   |       | 271 | 206  | 0 |
| 5247 | EMPTY   |   |       | 274 | 217  | 0 |
| 5248 | EMPTY   |   |       | 279 | 208  | 0 |
| 5249 | EMPTY   |   |       | 277 | 210  | 0 |
| 5250 | EMPTY   |   |       | 277 | 216  | 0 |
| 5251 | EMPTY   |   |       | 295 | 224  | 0 |

|      |         |   |         |      |      |   |
|------|---------|---|---------|------|------|---|
| 5252 | EMPTY   |   |         | 276  | 206  | 0 |
| 5253 | EMPTY   |   |         | 278  | 213  | 0 |
| 5254 | EMPTY   |   |         | 263  | 208  | 0 |
| 5255 | EMPTY   |   |         | 277  | 205  | 0 |
| 5256 | EMPTY   |   |         | 278  | 198  | 0 |
| 5257 | SS DNA  |   |         | 372  | 294  | 0 |
| 5258 | 3XSSC   |   |         | 294  | 229  | 0 |
| 5259 | 3XSSC   |   |         | 293  | 224  | 0 |
| 5260 | 3XSSC   |   |         | 289  | 227  | 0 |
| 5261 | EMPTY   |   |         | 280  | 197  | 0 |
| 5262 | EMPTY   |   |         | 294  | 206  | 0 |
| 5263 | EMPTY   |   |         | 272  | 230  | 0 |
| 5264 | EMPTY   |   |         | 282  | 212  | 0 |
| 5265 | EMPTY   |   |         | 274  | 213  | 0 |
| 5266 | EMPTY   |   |         | 277  | 213  | 0 |
| 5267 | EMPTY   |   |         | 270  | 209  | 0 |
| 5268 | EMPTY   |   |         | 275  | 209  | 0 |
| 5269 | EMPTY   |   |         | 277  | 210  | 0 |
| 5270 | EMPTY   |   |         | 278  | 215  | 0 |
| 5271 | EMPTY   |   |         | 278  | 216  | 0 |
| 5272 | EMPTY   |   |         | 273  | 213  | 0 |
| 5273 | EMPTY   |   |         | 280  | 215  | 0 |
| 5274 | EMPTY   |   |         | 274  | 208  | 0 |
| 5275 | EMPTY   |   |         | 295  | 205  | 0 |
| 5276 | EMPTY   |   |         | 277  | 214  | 0 |
| 5277 | EMPTY   |   |         | 271  | 205  | 0 |
| 5278 | EMPTY   |   |         | 278  | 202  | 0 |
| 5279 | EMPTY   |   |         | 279  | 209  | 0 |
| 5280 | EMPTY   |   |         | 318  | 198  | 0 |
| 5281 | YBR208C | C | DUR1, 2 | 351  | 260  | 1 |
| 5282 | YBR210W | W |         | 476  | 426  | 0 |
| 5283 | YBR212W | W | NGR1    | 705  | 650  | 0 |
| 5284 | YBR214W | W | SDS24   | 359  | 220  | 1 |
| 5285 | YBR216C | C |         | 369  | 309  | 0 |
| 5286 | YBR218C | C | PYC2    | 6816 | 5515 | 1 |
| 5287 | YCL002C | C |         | 414  | 311  | 0 |
| 5288 | YCL004W | W | PGS1    | 435  | 338  | 0 |
| 5289 | YCL006C |   |         | 298  | 211  | 0 |
| 5290 | YCL008C | C | STP22   | 432  | 410  | 0 |
| 5291 | YCL010C | C | SGF29   | 394  | 394  | 0 |
| 5292 | YCL012W | W | BUD3    | 297  | 238  | 0 |
| 5293 | YCR014C | C | POL4    | 449  | 414  | 0 |
| 5294 | YCR016W | W |         | 1353 | 1755 | 0 |
| 5295 | YCR018C | C | SRD1    | 276  | 207  | 1 |
| 5296 | YCR020C | C | PET18   | 525  | 492  | 1 |
| 5297 | YCR021C | C | HSP30   | 461  | 386  | 0 |
| 5298 | YCR023C | C |         | 707  | 612  | 0 |
| 5299 | YCR107W | W | AAD3    | 679  | 638  | 0 |
| 5300 | YCRX02C |   |         | 944  | 711  | 0 |
| 5301 | YCRX04W |   |         | 653  | 825  | 0 |
| 5302 | YCRX06W |   |         | 442  | 376  | 0 |
| 5303 | YCRX08W |   |         | 491  | 475  | 0 |

|      |         |   |        |      |      |   |
|------|---------|---|--------|------|------|---|
| 5304 | YCRX10W |   | 868    | 862  | 0    |   |
| 5305 | YDL075W | W | RPL31A | 720  | 804  | 0 |
| 5306 | YDL077C | C | VAM6   | 368  | 253  | 1 |
| 5307 | YDL079C | C | MRK1   | 386  | 252  | 0 |
| 5308 | YDL081C | C | RPP1A  | 1295 | 1050 | 0 |
| 5309 | YDL083C | C | RPS16B | 679  | 652  | 0 |
| 5310 | YDL085W | W |        | 285  | 250  | 0 |
| 5311 | YDL171C | C | GLT1   | 321  | 222  | 1 |
| 5312 | YDL173W | W |        | 1369 | 1631 | 0 |
| 5313 | YDL175C | C |        | 598  | 593  | 0 |
| 5314 | YDL177C | C |        | 509  | 523  | 0 |
| 5315 | YDL179W | W | PCL9   | 625  | 727  | 0 |
| 5316 | YDL181W | W | INH1   | 847  | 1023 | 0 |
| 5317 | YDR019C | C | GCV1   | 461  | 1101 | 0 |
| 5318 | YDR021W | W | FAL1   | 435  | 553  | 0 |
| 5319 | YDR023W | W | SES1   | 1678 | 1981 | 0 |
| 5320 | YDR025W | W | RPS11A | 1432 | 1489 | 0 |
| 5321 | YDR027C | C | LUV1   | 394  | 372  | 0 |
| 5322 | YDR029W | W |        | 613  | 647  | 0 |
| 5323 | YDR115W | W |        | 757  | 818  | 0 |
| 5324 | YDR117C | C |        | 1192 | 1314 | 0 |
| 5325 | YDR119W | W |        | 1218 | 1269 | 0 |
| 5326 | YDR121W | W | DPB4   | 777  | 994  | 0 |
| 5327 | YDR123C | C | INO2   | 585  | 615  | 0 |
| 5328 | YDR125C | C | ECM18  | 490  | 425  | 0 |
| 5329 | YDR211W | W | GCD6   | 1365 | 1618 | 0 |
| 5330 | YDR213W | W | UPC2   | 530  | 487  | 0 |
| 5331 | YDR215C | C |        | 526  | 315  | 0 |
| 5332 | YDR217C | C | RAD9   | 428  | 260  | 0 |
| 5333 | YDR219C | C |        | 553  | 508  | 0 |
| 5334 | YDR221W | W |        | 758  | 816  | 0 |
| 5335 | YDR307W | W |        | 649  | 632  | 0 |
| 5336 | YDR309C | C | GIC2   | 1756 | 2218 | 0 |
| 5337 | YDR311W | W | TFB1   | 482  | 505  | 0 |
| 5338 | YDR313C | C | PIB1   | 547  | 522  | 0 |
| 5339 | YDR315C | C | IPK1   | 393  | 412  | 0 |
| 5340 | YDR317W | W |        | 394  | 343  | 0 |
| 5341 | YDR403W | W | DIT1   | 436  | 364  | 0 |
| 5342 | YDR405W | W | MRP20  | 745  | 721  | 0 |
| 5343 | YDR407C | C | TRS120 | 320  | 272  | 0 |
| 5344 | YDR409W | W | SIZ1   | 405  | 399  | 1 |
| 5345 | YDR411C | C |        | 1003 | 953  | 0 |
| 5346 | YDR413C | C |        | 1048 | 1270 | 0 |
| 5347 | YDR499W | W | LCD1   | 870  | 938  | 0 |
| 5348 | YDR501W | W | PLM2   | 632  | 673  | 0 |
| 5349 | YDR503C | C | LPP1   | 674  | 689  | 0 |
| 5350 | YDR505C | C | PSP1   | 1418 | 1689 | 0 |
| 5351 | YDR507C | C | GIN4   | 683  | 1027 | 0 |
| 5352 | YDR509W | W |        | 320  | 292  | 1 |
| 5353 | YAL049C | C |        | 488  | 653  | 0 |
| 5354 | YAL053W | W |        | 280  | 212  | 1 |
| 5355 | YAL055W | W | PEX22  | 428  | 430  | 0 |

|      |         |   |         |      |      |   |
|------|---------|---|---------|------|------|---|
| 5356 | YAL058W | W | CNE1    | 283  | 219  | 1 |
| 5357 | YAL060W | W |         | 457  | 692  | 0 |
| 5358 | YAL062W | W | GDH3    | 345  | 276  | 0 |
| 5359 | YBL040C | C | ERD2    | 999  | 1080 | 0 |
| 5360 | YBL042C | C | FUI1    | 1071 | 940  | 0 |
| 5361 | YBL044W | W |         | 313  | 224  | 0 |
| 5362 | YBL046W | W |         | 500  | 532  | 0 |
| 5363 | YBL048W | W |         | 344  | 309  | 0 |
| 5364 | YBL050W | W | SEC17   | 977  | 1218 | 0 |
| 5365 | YBR019C | C | GAL10   | 284  | 221  | 0 |
| 5366 | YBR021W | W | FUR4    | 412  | 383  | 0 |
| 5367 | YBR023C | C | CHS3    | 392  | 385  | 0 |
| 5368 | YBR025C | C |         | 2753 | 2889 | 0 |
| 5369 | YBR027C | C |         | 369  | 359  | 0 |
| 5370 | YBR029C | C | CDS1    | 439  | 462  | 0 |
| 5371 | YBR113W | W |         | 829  | 1063 | 0 |
| 5372 | YBR115C | C | LYS2    | 374  | 332  | 0 |
| 5373 | YBR117C | C | TKL2    | 346  | 595  | 0 |
| 5374 | YBR119W | W | MUD1    | 556  | 623  | 0 |
| 5375 | YBR121C | C | GRS1    | 2845 | 3093 | 0 |
| 5376 | YBR123C | C | TFC1    | 633  | 659  | 2 |
| 5377 | YEL049W | W | PAU2    | 376  | 319  | 0 |
| 5378 | YEL051W | W | VMA8    | 982  | 1256 | 0 |
| 5379 | YEL053C | C | MAK10   | 294  | 244  | 0 |
| 5380 | YEL055C | C | POL5    | 359  | 274  | 1 |
| 5381 | YEL057C | C |         | 355  | 274  | 0 |
| 5382 | YEL059W | W |         | 387  | 285  | 0 |
| 5383 | YER065C | C | ICL1    | 508  | 415  | 0 |
| 5384 | YER067W | W |         | 446  | 283  | 0 |
| 5385 | YER069W | W | ARG5, 6 | 522  | 509  | 0 |
| 5386 | YER071C | C |         | 590  | 620  | 0 |
| 5387 | YER073W | W | ALD5    | 1179 | 1210 | 0 |
| 5388 | YER075C | C | PTP3    | 608  | 692  | 0 |
| 5389 | YER160C | C |         | 4798 | 6936 | 0 |
| 5390 | YER162C | C | RAD4    | 554  | 575  | 0 |
| 5391 | YER164W | W | CHD1    | 978  | 1225 | 0 |
| 5392 | YER166W | W | DNF1    | 431  | 392  | 1 |
| 5393 | YER168C | C | CCA1    | 906  | 1020 | 0 |
| 5394 | YER170W | W | ADK2    | 581  | 571  | 0 |
| 5395 | YFL063W | W |         | 768  | 582  | 0 |
| 5396 | YFL065C | C |         | 1166 | 1013 | 0 |
| 5397 | YFL067W | W |         | 3448 | 4106 | 0 |
| 5398 | YFR001W | W | LOC1    | 975  | 1248 | 0 |
| 5399 | YFR003C | C |         | 698  | 1020 | 0 |
| 5400 | YFR005C | C | SAD1    | 724  | 757  | 0 |
| 5401 | YGL033W | W | HOP2    | 326  | 230  | 0 |
| 5402 | YGL035C | C | MIG1    | 662  | 699  | 0 |
| 5403 | YGL037C | C | PNC1    | 1394 | 3047 | 0 |
| 5404 | YGL039W | W |         | 875  | 765  | 0 |
| 5405 | YGL041C | C |         | 534  | 560  | 0 |
| 5406 | YGL043W | W | DST1    | 624  | 893  | 0 |
| 5407 | YGL129C | C | RSM23   | 577  | 607  | 0 |

|      |         |   |         |      |      |   |
|------|---------|---|---------|------|------|---|
| 5408 | YGL131C | C |         | 380  | 398  | 0 |
| 5409 | YGL133W | W | ITC1    | 670  | 890  | 0 |
| 5410 | YGL135W | W | RPL1B   | 5922 | 4868 | 0 |
| 5411 | YGL137W | W | SEC27   | 2415 | 2766 | 0 |
| 5412 | YGL139W | W |         | 610  | 556  | 0 |
| 5413 | YGL225W | W | VRG4    | 2277 | 2065 | 0 |
| 5414 | YGL227W | W | VID30   | 429  | 414  | 0 |
| 5415 | YGL229C | C | SAP4    | 526  | 440  | 0 |
| 5416 | YGL231C | C |         | 1096 | 1437 | 0 |
| 5417 | YGL233W | W | SEC15   | 937  | 1078 | 0 |
| 5418 | YGL235W | W |         | 419  | 361  | 0 |
| 5419 | YGR058W | W |         | 625  | 687  | 0 |
| 5420 | YGR060W | W | ERG25   | 304  | 287  | 1 |
| 5421 | YGR062C | C | COX18   | 511  | 491  | 0 |
| 5422 | YGR064W | W |         | 629  | 638  | 0 |
| 5423 | YGR066C | C |         | 341  | 292  | 0 |
| 5424 | YGR068C | C |         | 456  | 429  | 0 |
| 5425 | YGR154C | C |         | 403  | 355  | 0 |
| 5426 | YGR156W | W | PTI1    | 572  | 509  | 0 |
| 5427 | YGR158C | C | MTR3    | 810  | 825  | 0 |
| 5428 | YGR160W | W | FYV13   | 2567 | 3331 | 0 |
| 5429 | YGR162W | W | TIF4631 | 1569 | 1859 | 0 |
| 5430 | YGR164W | W |         | 320  | 241  | 0 |
| 5431 | YGR250C | C |         | 550  | 577  | 0 |
| 5432 | YGR252W | W | GCN5    | 514  | 536  | 0 |
| 5433 | YGR254W | W | ENO1    | 7027 | 8249 | 0 |
| 5434 | YGR256W | W | GND2    | 541  | 899  | 0 |
| 5435 | YGR258C | C | RAD2    | 358  | 411  | 0 |
| 5436 | YGR260W | W | TNA1    | 1388 | 1338 | 0 |
| 5437 | YHL050C | C |         | 2978 | 3683 | 0 |
| 5438 | YHR002W | W | LEU5    | 474  | 404  | 0 |
| 5439 | YHR004C | C | NEM1    | 642  | 683  | 0 |
| 5440 | YHR006W | W | STP2    | 261  | 189  | 1 |
| 5441 | YHR008C | C | SOD2    | 245  | 197  | 1 |
| 5442 | YHR010W | W | RPL27A  | 2475 | 2905 | 0 |
| 5443 | YHR094C | C | HXT1    | 4178 | 3032 | 0 |
| 5444 | YHR096C | C | HXT5    | 529  | 735  | 0 |
| 5445 | YHR098C | C | SFB3    | 793  | 727  | 0 |
| 5446 | YHR100C | C |         | 609  | 546  | 0 |
| 5447 | YHR102W | W | KIC1    | 575  | 640  | 0 |
| 5448 | YHR104W | W | GRE3    | 999  | 3071 | 0 |
| 5449 | YHR189W | W |         | 432  | 342  | 0 |
| 5450 | YHR191C | C | CTF8    | 512  | 563  | 0 |
| 5451 | YHR193C | C | EGD2    | 2382 | 3097 | 0 |
| 5452 | YHR195W | W | NVJ1    | 531  | 507  | 0 |
| 5453 | YHR197W | W |         | 901  | 1058 | 0 |
| 5454 | YHR199C | C |         | 774  | 910  | 0 |
| 5455 | YIL066C | C | RNR3    | 254  | 189  | 0 |
| 5456 | YIL068C | C | SEC6    | 246  | 192  | 1 |
| 5457 | YIL070C | C | MAM33   | 245  | 197  | 0 |
| 5458 | YIL072W | W | HOP1    | 267  | 206  | 0 |
| 5459 | YIL074W |   |         | 245  | 198  | 0 |

|      |         |   |        |      |       |   |
|------|---------|---|--------|------|-------|---|
| 5460 | YIL076W | W | SEC28  | 248  | 185   | 0 |
| 5461 | YIL163C | C |        | 334  | 251   | 0 |
| 5462 | YIL165C | C |        | 353  | 295   | 0 |
| 5463 | YIL167W | W |        | 326  | 282   | 0 |
| 5464 | YIL169C | C |        | 710  | 890   | 0 |
| 5465 | YIL171W | W | HXT12  | 352  | 280   | 0 |
| 5466 | YIL173W | W | VTH1   | 427  | 411   | 2 |
| 5467 | YJL038C | C |        | 344  | 280   | 0 |
| 5468 | YJL041W | W | NSP1   | 717  | 898   | 0 |
| 5469 | YJL043W | W |        | 271  | 206   | 0 |
| 5470 | YJL045W | W |        | 287  | 251   | 0 |
| 5471 | YJL047C | C | RTT101 | 303  | 278   | 0 |
| 5472 | YJL049W | W |        | 264  | 207   | 1 |
| 5473 | YJL135W | W |        | 768  | 975   | 0 |
| 5474 | YJL137C | C | GLG2   | 604  | 638   | 0 |
| 5475 | YJL139C | C | YUR1   | 568  | 601   | 0 |
| 5476 | YJL141C | C | YAK1   | 761  | 711   | 0 |
| 5477 | YJL143W | W | TIM17  | 1007 | 1038  | 0 |
| 5478 | YJL145W | W |        | 920  | 1194  | 0 |
| 5479 | YJR007W | W | SUI2   | 1990 | 2035  | 0 |
| 5480 | YJR009C | C | TDH2   | 7987 | 11816 | 0 |
| 5481 | YJR010W | W | MET3   | 622  | 668   | 0 |
| 5482 | YJR012C | C |        | 458  | 439   | 0 |
| 5483 | YJR014W | W |        | 1566 | 2227  | 0 |
| 5484 | YJR016C | C | ILV3   | 3485 | 2160  | 0 |
| 5485 | YJR103W | W | URA8   | 608  | 801   | 0 |
| 5486 | YJR105W | W | AD01   | 3814 | 3957  | 0 |
| 5487 | YJR107W | W |        | 633  | 595   | 0 |
| 5488 | YJR109C | C | CPA2   | 695  | 618   | 0 |
| 5489 | YJR111C | C |        | 315  | 298   | 0 |
| 5490 | YJR113C | C | RSM7   | 414  | 523   | 0 |
| 5491 | YKL036C | C |        | 561  | 833   | 0 |
| 5492 | YKL038W | W | RGT1   | 520  | 492   | 0 |
| 5493 | YKL040C | C | NFU1   | 787  | 968   | 0 |
| 5494 | YKL042W | W | SPC42  | 389  | 399   | 0 |
| 5495 | YKL044W | W |        | 470  | 343   | 0 |
| 5496 | YKL046C | C |        | 1317 | 1421  | 0 |
| 5497 | YKL131W | W |        | 351  | 240   | 0 |
| 5498 | YKL133C | C |        | 345  | 335   | 0 |
| 5499 | YKL135C | C | APL2   | 669  | 716   | 0 |
| 5500 | YKL137W | W |        | 1185 | 949   | 0 |
| 5501 | YKL139W | W | CTK1   | 583  | 554   | 0 |
| 5502 | YKL141W | W | SDH3   | 954  | 896   | 0 |
| 5503 | YKR002W | W | PAP1   | 896  | 994   | 0 |
| 5504 | YKR004C | C | ECM9   | 483  | 422   | 0 |
| 5505 | YKR006C | C | MRPL13 | 801  | 959   | 0 |
| 5506 | YKR008W | W | RSC4   | 977  | 1144  | 0 |
| 5507 | YKR010C | C | TOF2   | 621  | 567   | 2 |
| 5508 | YKR012C | C |        | 980  | 1261  | 0 |
| 5509 | YKR098C | C | UBP11  | 490  | 420   | 0 |
| 5510 | YKR100C | C |        | 726  | 737   | 0 |
| 5511 | YKR102W | W | FL010  | 324  | 225   | 0 |

|      |         |   |        |      |      |   |
|------|---------|---|--------|------|------|---|
| 5512 | YKR104W | W |        | 367  | 278  | 0 |
| 5513 | YKR106W | W |        | 470  | 372  | 0 |
| 5514 | YLL002W | W | REM50  | 493  | 437  | 0 |
| 5515 | YLR021W | W |        | 570  | 668  | 0 |
| 5516 | YLR023C | C |        | 1161 | 1146 | 0 |
| 5517 | YLR025W | W | SNF7   | 1014 | 1373 | 0 |
| 5518 | YLR027C | C | AAT2   | 3096 | 3643 | 0 |
| 5519 | YLR029C | C | RPL15A | 5346 | 5177 | 0 |
| 5520 | YLR031W | W |        | 392  | 363  | 0 |
| 5521 | YLR117C | C | CLF1   | 567  | 552  | 0 |
| 5522 | YLR119W | W | SRN2   | 469  | 497  | 0 |
| 5523 | YLR121C | C | YPS3   | 668  | 804  | 2 |
| 5524 | YLR123C | C |        | 287  | 209  | 0 |
| 5525 | YLR125W | W |        | 341  | 254  | 0 |
| 5526 | YLR127C | C | APC2   | 426  | 402  | 0 |
| 5527 | YLR213C | C | CRR1   | 403  | 354  | 0 |
| 5528 | YLR215C | C | CDC123 | 518  | 540  | 0 |
| 5529 | YLR217W | W |        | 885  | 1760 | 0 |
| 5530 | YLR219W | W | MSC3   | 937  | 907  | 0 |
| 5531 | YLR221C | C | RSA3   | 823  | 994  | 0 |
| 5532 | YLR223C | C | IFH1   | 547  | 881  | 0 |
| 5533 | YLR309C | C | IMH1   | 964  | 1349 | 0 |
| 5534 | YLR311C | C |        | 306  | 211  | 0 |
| 5535 | YLR313C | C | SPH1   | 406  | 370  | 0 |
| 5536 | YLR315W | W |        | 412  | 335  | 0 |
| 5537 | YLR317W | W | KRE34  | 549  | 513  | 0 |
| 5538 | YLR319C | C | BUD6   | 498  | 560  | 0 |
| 5539 | YLR405W | W |        | 604  | 626  | 0 |
| 5540 | YLR407W | W |        | 664  | 846  | 0 |
| 5541 | YLR409C | C |        | 961  | 1230 | 0 |
| 5542 | YLR411W | W | CTR3   | 440  | 407  | 0 |
| 5543 | YLR413W | W |        | 2997 | 2712 | 0 |
| 5544 | YLR415C | C |        | 345  | 262  | 0 |
| 5545 | YML041C | C |        | 553  | 536  | 0 |
| 5546 | YML043C | C | RRN11  | 505  | 634  | 0 |
| 5547 | YML046W | W | PRP39  | 776  | 637  | 0 |
| 5548 | YML048W | W | GSF2   | 1754 | 1511 | 0 |
| 5549 | YML050W | W |        | 381  | 306  | 0 |
| 5550 | YML053C | C |        | 643  | 654  | 0 |
| 5551 | YMR015C | C | ERG5   | 1485 | 1628 | 0 |
| 5552 | YMR017W | W | SPO20  | 326  | 212  | 0 |
| 5553 | YMR019W | W | STB4   | 262  | 183  | 1 |
| 5554 | YMR021C | C | MAC1   | 472  | 502  | 0 |
| 5555 | YMR023C | C | MSS1   | 404  | 372  | 0 |
| 5556 | YMR025W | W |        | 298  | 267  | 0 |
| 5557 | YMR134W | W |        | 569  | 546  | 0 |
| 5558 | YMR136W | W | GAT2   | 711  | 527  | 0 |
| 5559 | YMR138W | W | CIN4   | 400  | 344  | 0 |
| 5560 | YMR140W | W |        | 569  | 622  | 0 |
| 5561 | YMR144W | W |        | 506  | 424  | 0 |
| 5562 | YMR146C | C | TIF34  | 2055 | 2462 | 0 |
| 5563 | YMR227C | C | TAF67  | 678  | 826  | 0 |

|      |         |   |        |      |      |   |
|------|---------|---|--------|------|------|---|
| 5564 | YMR229C | C | RRP5   | 758  | 770  | 2 |
| 5565 | YMR232W | W | FUS2   | 352  | 316  | 0 |
| 5566 | YMR234W | W | RNH1   | 765  | 659  | 0 |
| 5567 | YMR236W | W | TAF17  | 884  | 1294 | 0 |
| 5568 | YMR238W | W | DFG5   | 1097 | 1234 | 0 |
| 5569 | YNL006W | W | LST8   | 736  | 680  | 0 |
| 5570 | YNL008C | C | ASI3   | 690  | 629  | 0 |
| 5571 | YNL010W | W |        | 1877 | 1746 | 0 |
| 5572 | YNL012W | W | SP01   | 380  | 278  | 0 |
| 5573 | YNL014W | W | HEF3   | 372  | 249  | 0 |
| 5574 | YNL016W | W | PUB1   | 1162 | 1368 | 1 |
| 5575 | YNL102W | W | POL1   | 339  | 296  | 0 |
| 5576 | YNL104C | C | LEU4   | 3072 | 3821 | 0 |
| 5577 | YNL106C | C | INP52  | 556  | 452  | 0 |
| 5578 | YNL108C | C |        | 949  | 1032 | 0 |
| 5579 | YNL110C | C | NOP15  | 1373 | 1894 | 0 |
| 5580 | YNL112W | W | DBP2   | 757  | 691  | 0 |
| 5581 | YNL198C | C |        | 330  | 306  | 0 |
| 5582 | YNL200C | C |        | 523  | 643  | 0 |
| 5583 | YNL202W | W | SPS19  | 360  | 305  | 0 |
| 5584 | YNL204C | C | SPS18  | 392  | 294  | 0 |
| 5585 | YNL206C | C | RTT106 | 512  | 706  | 0 |
| 5586 | YNL208W | W |        | 629  | 2514 | 0 |
| 5587 | YNL294C | C |        | 777  | 834  | 0 |
| 5588 | YNL296W | W | KRE25  | 629  | 496  | 0 |
| 5589 | YNL298W | W | CLA4   | 3388 | 2830 | 0 |
| 5590 | YNL300W | W | TOS6   | 1642 | 1690 | 0 |
| 5591 | YNL302C | C | RPS19B | 250  | 184  | 1 |
| 5592 | YNL304W | W | YPT11  | 395  | 338  | 0 |
| 5593 | YNR051C | C | BRE5   | 2265 | 2644 | 0 |
| 5594 | YNR053C | C | NOG2   | 656  | 1117 | 0 |
| 5595 | YNR055C | C | HOL1   | 599  | 579  | 0 |
| 5596 | YNR057C | C | BI04   | 309  | 243  | 0 |
| 5597 | YNR059W | W | MNT4   | 355  | 282  | 0 |
| 5598 | YNR061C | C |        | 897  | 773  | 0 |
| 5599 | YOL069W | W | NUF2   | 768  | 613  | 0 |
| 5600 | YOL071W | W |        | 534  | 621  | 0 |
| 5601 | YOL073C | C |        | 444  | 396  | 0 |
| 5602 | YOL075C | C |        | 645  | 667  | 0 |
| 5603 | YOL077C | C | BRX1   | 1523 | 1860 | 0 |
| 5604 | YOL079W | W |        | 542  | 555  | 0 |
| 5605 | YOL165C | C | AAD15  | 584  | 517  | 0 |
| 5606 | YOR001W | W | RRP6   | 905  | 1034 | 0 |
| 5607 | YOR003W | W | YSP3   | 397  | 403  | 0 |
| 5608 | YOR005C | C | DNL4   | 313  | 304  | 0 |
| 5609 | YOR007C | C | SGT2   | 2115 | 3914 | 0 |
| 5610 | YOR009W | W | TIR4   | 387  | 291  | 0 |
| 5611 | YOR095C | C | RKI1   | 1177 | 1260 | 0 |
| 5612 | YOR097C | C |        | 491  | 522  | 0 |
| 5613 | YOR099W | W | KTR1   | 2051 | 1762 | 0 |
| 5614 | YOR101W | W | RAS1   | 1008 | 1028 | 0 |
| 5615 | YOR103C | C | OST2   | 723  | 708  | 0 |

|      |         |   |            |      |      |   |
|------|---------|---|------------|------|------|---|
| 5616 | YOR105W | W |            | 442  | 396  | 0 |
| 5617 | YOR191W | W | RIS1       | 356  | 378  | 0 |
| 5618 | YOR193W | W |            | 566  | 622  | 0 |
| 5619 | YOR195W | W | SLK19      | 772  | 883  | 0 |
| 5620 | YOR197W | W |            | 1546 | 1709 | 0 |
| 5621 | YOR199W | W |            | 516  | 503  | 0 |
| 5622 | YOR201C | C | PET56      | 665  | 713  | 0 |
| 5623 | YOR287C | C |            | 646  | 1347 | 0 |
| 5624 | YOR289W | W |            | 441  | 470  | 0 |
| 5625 | YOR291W | W |            | 380  | 325  | 0 |
| 5626 | YOR293W | W | RPS10A     | 1350 | 1535 | 0 |
| 5627 | YOR295W | W | UAF30      | 397  | 385  | 0 |
| 5628 | YOR297C | C | TIM18      | 736  | 657  | 0 |
| 5629 | YOR383C | C | FIT3       | 375  | 426  | 0 |
| 5630 | YOR385W | W |            | 348  | 308  | 0 |
| 5631 | YOR387C | C |            | 307  | 254  | 0 |
| 5632 | YOR389W | W |            | 294  | 204  | 0 |
| 5633 | YOR391C | C |            | 297  | 206  | 0 |
| 5634 | YOR393W | W | ERR1       | 273  | 197  | 0 |
| 5635 | YPL085W | W | SEC16      | 230  | 167  | 1 |
| 5636 | YPL087W | W | YDC1       | 575  | 688  | 0 |
| 5637 | YPL089C | C | RLM1       | 267  | 176  | 1 |
| 5638 | YPL091W | W | GLR1       | 860  | 1197 | 0 |
| 5639 | YPL093W | W | NOG1       | 244  | 168  | 0 |
| 5640 | YPL095C | C |            | 346  | 320  | 0 |
| 5641 | YPL181W | W |            | 240  | 181  | 1 |
| 5642 | YPL183C | C |            | 610  | 621  | 0 |
| 5643 | YPL185W | W |            | 312  | 258  | 0 |
| 5644 | YPL187W | W | MF (ALPHA) | 389  | 251  | 0 |
| 5645 | YPL189W | W | GUP2       | 336  | 237  | 0 |
| 5646 | YPL191C | C |            | 469  | 412  | 0 |
| 5647 | YPL277C | C |            | 468  | 309  | 0 |
| 5648 | YPL279C | C |            | 1116 | 883  | 0 |
| 5649 | YPL281C | C | ERR2       | 428  | 310  | 0 |
| 5650 | YPL283C | C | YRF1-7     | 266  | 190  | 1 |
| 5651 | YPR002W | W | PDH1       | 333  | 300  | 0 |
| 5652 | YPR004C | C |            | 1029 | 1102 | 0 |
| 5653 | YPR090W | W |            | 813  | 937  | 0 |
| 5654 | YPR092W | W |            | 413  | 366  | 0 |
| 5655 | YPR094W | W |            | 420  | 454  | 0 |
| 5656 | YPR096C | C |            | 343  | 261  | 0 |
| 5657 | YPR098C | C |            | 549  | 689  | 0 |
| 5658 | YPR100W | W |            | 526  | 643  | 0 |
| 5659 | YPR186C | C | PZF1       | 565  | 623  | 0 |
| 5660 | YPR188C | C | MLC2       | 616  | 749  | 0 |
| 5661 | YPR190C | C | RPC82      | 759  | 884  | 0 |
| 5662 | YPR192W | W | AQY1       | 369  | 286  | 0 |
| 5663 | YPR194C | C | OPT2       | 415  | 312  | 0 |
| 5664 | YPR196W | W |            | 390  | 310  | 0 |
| 5665 | NORF 51 |   |            | 2250 | 2674 | 0 |
| 5666 | NORF 55 |   |            | 725  | 548  | 0 |
| 5667 | NORF 59 |   |            | 401  | 361  | 0 |

|      |                         |          |      |      |   |
|------|-------------------------|----------|------|------|---|
| 5668 | NORF 63                 |          | 440  | 402  | 0 |
| 5669 | NORF 67                 |          | 349  | 259  | 0 |
| 5670 | NORF 71                 |          | 376  | 346  | 0 |
| 5671 | YCR093W                 | W CDC39  | 862  | 793  | 1 |
| 5672 | YDL058W                 | W US01   | 569  | 626  | 2 |
| 5673 | YDL077C                 | C VAM6   | 523  | 619  | 0 |
| 5674 | YDL111C                 | C RRP42  | 941  | 1015 | 0 |
| 5675 | YDL138W                 | W RGT2   | 569  | 512  | 0 |
| 5676 | YDL145C                 | C COP1   | 1877 | 1778 | 0 |
| 5677 | YHR037W                 | W PUT2   | 255  | 173  | 0 |
| 5678 | YHR048W                 | W        | 256  | 177  | 0 |
| 5679 | YHR076W                 | W        | 252  | 187  | 0 |
| 5680 | YHR078W                 | W        | 252  | 174  | 0 |
| 5681 | YHR098C                 | C SFB3   | 244  | 176  | 0 |
| 5682 | YHR183W                 | W GND1   | 234  | 169  | 0 |
| 5683 | YMR190C                 | C SGS1   | 556  | 553  | 2 |
| 5684 | YMR268C                 | C PRP24  | 394  | 389  | 0 |
| 5685 | YMR312W                 | W ELP6   | 777  | 679  | 0 |
| 5686 | YMR326C                 | C        | 404  | 290  | 1 |
| 5687 | YNL050C                 | C        | 602  | 743  | 0 |
| 5688 | YNL071W                 | W LAT1   | 2352 | 3607 | 0 |
| 5689 | EMPTY                   |          | 382  | 307  | 0 |
| 5690 | EMPTY                   |          | 269  | 192  | 0 |
| 5691 | EMPTY                   |          | 266  | 191  | 0 |
| 5692 | EMPTY                   |          | 287  | 203  | 0 |
| 5693 | EMPTY                   |          | 440  | 411  | 0 |
| 5694 | EMPTY                   |          | 275  | 202  | 0 |
| 5695 | YDR248C                 | C        | 520  | 592  | 0 |
| 5696 | YAL068C                 | C        | 678  | 518  | 0 |
| 5697 | YMR006C                 | C PLB2   | 1137 | 665  | 0 |
| 5698 | YML052W                 | W SUR7   | 1617 | 1275 | 0 |
| 5699 | YMR085W                 | W        | 474  | 409  | 0 |
| 5700 | YFL034C- <del>F</del> C | MOB2     | 750  | 821  | 0 |
| 5701 | YGL226C- <del>F</del> C | OST5     | 581  | 515  | 0 |
| 5702 | YHR021W- <del>F</del> W | ECM12    | 444  | 464  | 0 |
| 5703 | YHR079C- <del>F</del> C | SAE3     | 291  | 205  | 0 |
| 5704 | EMPTY                   |          | 252  | 184  | 0 |
| 5705 | EMPTY                   |          | 266  | 184  | 0 |
| 5706 | EMPTY                   |          | 243  | 173  | 0 |
| 5707 | YHR033W                 | W        | 254  | 166  | 1 |
| 5708 | YHR035W                 | W        | 253  | 181  | 1 |
| 5709 | YHR040W                 | W        | 260  | 228  | 1 |
| 5710 | YHR044C                 | C DOG1   | 254  | 188  | 1 |
| 5711 | YHR092C                 | C HXT4   | 244  | 170  | 1 |
| 5712 | YIL125W                 | W KGD1   | 256  | 182  | 1 |
| 5713 | YMR158W- <del>F</del> W |          | 287  | 217  | 0 |
| 5714 | YMR173W- <del>F</del> W |          | 1009 | 2038 | 0 |
| 5715 | YMR194W                 | W RPL36A | 900  | 1007 | 0 |
| 5716 | YMR230W                 | W RPS10B | 916  | 956  | 0 |
| 5717 | YMR251W- <del>F</del> W | HOR7     | 601  | 1667 | 0 |
| 5718 | YMR292W                 | W GOT1   | 646  | 541  | 0 |
| 5719 | YML077W                 | W BET5   | 590  | 598  | 0 |

|      |         |   |       |      |      |   |
|------|---------|---|-------|------|------|---|
| 5720 | YML111W | W | BUL2  | 1033 | 1650 | 0 |
| 5721 | YMR008C | C | PLB1  | 1168 | 1224 | 0 |
| 5722 | YMR030W | W |       | 406  | 341  | 0 |
| 5723 | YMR187C | C |       | 443  | 398  | 2 |
| 5724 | YMR199W | W | CLN1  | 382  | 357  | 1 |
| 5725 | EMPTY   |   |       | 267  | 183  | 0 |
| 5726 | EMPTY   |   |       | 331  | 216  | 0 |
| 5727 | EMPTY   |   |       | 262  | 183  | 0 |
| 5728 | EMPTY   |   |       | 249  | 181  | 0 |
| 5729 | EMPTY   |   |       | 252  | 174  | 0 |
| 5730 | EMPTY   |   |       | 245  | 184  | 0 |
| 5731 | EMPTY   |   |       | 243  | 164  | 0 |
| 5732 | EMPTY   |   |       | 257  | 171  | 0 |
| 5733 | EMPTY   |   |       | 252  | 192  | 0 |
| 5734 | EMPTY   |   |       | 256  | 193  | 0 |
| 5735 | EMPTY   |   |       | 239  | 160  | 0 |
| 5736 | EMPTY   |   |       | 251  | 161  | 0 |
| 5737 | YDL228C | C |       | 285  | 221  | 1 |
| 5738 | YDL232W | W | OST4  | 280  | 190  | 1 |
| 5739 | YDL248W | W | COS7  | 291  | 193  | 1 |
| 5740 | YDR017C | C | KCS1  | 284  | 195  | 1 |
| 5741 | YDR030C | C | RAD28 | 284  | 187  | 1 |
| 5742 | YDR216W | W | ADR1  | 310  | 222  | 1 |
| 5743 | EMPTY   |   |       | 298  | 190  | 0 |
| 5744 | EMPTY   |   |       | 267  | 186  | 0 |
| 5745 | EMPTY   |   |       | 268  | 188  | 0 |
| 5746 | EMPTY   |   |       | 279  | 185  | 0 |
| 5747 | EMPTY   |   |       | 286  | 179  | 0 |
| 5748 | EMPTY   |   |       | 259  | 176  | 0 |
| 5749 | EMPTY   |   |       | 263  | 180  | 0 |
| 5750 | EMPTY   |   |       | 269  | 179  | 0 |
| 5751 | EMPTY   |   |       | 255  | 174  | 0 |
| 5752 | EMPTY   |   |       | 260  | 176  | 0 |
| 5753 | EMPTY   |   |       | 253  | 166  | 0 |
| 5754 | EMPTY   |   |       | 255  | 168  | 0 |
| 5755 | EMPTY   |   |       | 244  | 166  | 0 |
| 5756 | EMPTY   |   |       | 240  | 163  | 0 |
| 5757 | EMPTY   |   |       | 248  | 177  | 0 |
| 5758 | EMPTY   |   |       | 246  | 172  | 0 |
| 5759 | EMPTY   |   |       | 234  | 169  | 0 |
| 5760 | EMPTY   |   |       | 237  | 164  | 0 |
| 5761 | SS DNA  |   |       | 258  | 190  | 0 |
| 5762 | 3XSSC   |   |       | 266  | 179  | 0 |
| 5763 | 3XSSC   |   |       | 256  | 177  | 0 |
| 5764 | 3XSSC   |   |       | 261  | 171  | 0 |
| 5765 | EMPTY   |   |       | 257  | 172  | 0 |
| 5766 | EMPTY   |   |       | 282  | 186  | 0 |
| 5767 | EMPTY   |   |       | 336  | 222  | 0 |
| 5768 | EMPTY   |   |       | 278  | 184  | 0 |
| 5769 | EMPTY   |   |       | 267  | 185  | 0 |
| 5770 | EMPTY   |   |       | 276  | 180  | 0 |
| 5771 | EMPTY   |   |       | 280  | 182  | 0 |

|      |                         |   |      |      |   |
|------|-------------------------|---|------|------|---|
| 5772 | EMPTY                   |   | 255  | 177  | 0 |
| 5773 | EMPTY                   |   | 266  | 178  | 0 |
| 5774 | EMPTY                   |   | 267  | 181  | 0 |
| 5775 | EMPTY                   |   | 253  | 170  | 0 |
| 5776 | EMPTY                   |   | 252  | 188  | 0 |
| 5777 | EMPTY                   |   | 246  | 167  | 0 |
| 5778 | EMPTY                   |   | 275  | 180  | 0 |
| 5779 | EMPTY                   |   | 247  | 166  | 0 |
| 5780 | EMPTY                   |   | 246  | 164  | 0 |
| 5781 | EMPTY                   |   | 240  | 163  | 0 |
| 5782 | EMPTY                   |   | 250  | 176  | 0 |
| 5783 | EMPTY                   |   | 247  | 168  | 0 |
| 5784 | EMPTY                   |   | 246  | 157  | 0 |
| 5785 | SS DNA                  |   | 393  | 305  | 0 |
| 5786 | 3XSSC                   |   | 253  | 171  | 0 |
| 5787 | 3XSSC                   |   | 254  | 171  | 0 |
| 5788 | 3XSSC                   |   | 249  | 166  | 0 |
| 5789 | EMPTY                   |   | 254  | 172  | 0 |
| 5790 | EMPTY                   |   | 260  | 188  | 0 |
| 5791 | EMPTY                   |   | 264  | 185  | 0 |
| 5792 | EMPTY                   |   | 269  | 183  | 0 |
| 5793 | EMPTY                   |   | 270  | 180  | 0 |
| 5794 | EMPTY                   |   | 274  | 200  | 0 |
| 5795 | EMPTY                   |   | 267  | 190  | 0 |
| 5796 | EMPTY                   |   | 263  | 185  | 0 |
| 5797 | EMPTY                   |   | 269  | 182  | 0 |
| 5798 | EMPTY                   |   | 260  | 185  | 0 |
| 5799 | EMPTY                   |   | 258  | 171  | 0 |
| 5800 | EMPTY                   |   | 248  | 167  | 0 |
| 5801 | EMPTY                   |   | 255  | 165  | 0 |
| 5802 | EMPTY                   |   | 246  | 166  | 0 |
| 5803 | EMPTY                   |   | 246  | 166  | 0 |
| 5804 | EMPTY                   |   | 247  | 169  | 0 |
| 5805 | EMPTY                   |   | 250  | 169  | 0 |
| 5806 | EMPTY                   |   | 243  | 174  | 0 |
| 5807 | EMPTY                   |   | 247  | 164  | 0 |
| 5808 | EMPTY                   |   | 239  | 167  | 0 |
| 5809 | YBR220C                 | C | 737  | 723  | 0 |
| 5810 | YBR222C                 | C | 1202 | 1240 | 0 |
| 5811 | YBR224W                 | W | 244  | 183  | 1 |
| 5812 | YBR226C                 | C | 241  | 164  | 1 |
| 5813 | YBR228W                 | W | 469  | 492  | 0 |
| 5814 | YBR230C                 | C | 755  | 1102 | 0 |
| 5815 | YCL014W                 | W | 638  | 535  | 0 |
| 5816 | YCL017C                 | C | 1100 | 1112 | 0 |
| 5817 | YCL019W                 | W | 1318 | 1871 | 0 |
| 5818 | YCL021W                 |   | 1276 | 1752 | 0 |
| 5819 | YCL023C                 | C | 416  | 333  | 0 |
| 5820 | YCL025C                 | C | 830  | 567  | 0 |
| 5821 | YCR024C- <del>A</del> C | C | 716  | 774  | 1 |
| 5822 | YCR026C                 | C | 352  | 297  | 1 |
| 5823 | YCR028C                 | C | 342  | 274  | 1 |

|      |           |   |        |      |      |   |
|------|-----------|---|--------|------|------|---|
| 5824 | YCR029C-A |   | 1250   | 1132 | 0    |   |
| 5825 | YCR031C   | C | RPS14A | 3493 | 3141 | 0 |
| 5826 | YCR033W   | W | SNT1   | 313  | 243  | 0 |
| 5827 | YCRX12W   |   |        | 351  | 245  | 0 |
| 5828 | YCRX14W   |   |        | 1142 | 886  | 0 |
| 5829 | YCRX16C   |   |        | 831  | 842  | 0 |
| 5830 | YCRX18C   |   |        | 658  | 737  | 0 |
| 5831 | YCRX20C   |   |        | 846  | 716  | 0 |
| 5832 | YDL001W   | W |        | 739  | 733  | 0 |
| 5833 | YDL087C   | C | LUC7   | 395  | 375  | 0 |
| 5834 | YDL089W   | W |        | 366  | 337  | 0 |
| 5835 | YDL091C   | C |        | 416  | 422  | 0 |
| 5836 | YDL093W   | W | PMT5   | 300  | 212  | 1 |
| 5837 | YDL095W   | W | PMT1   | 802  | 718  | 0 |
| 5838 | YDL097C   | C | RPN6   | 487  | 646  | 0 |
| 5839 | YDL183C   | C |        | 470  | 366  | 0 |
| 5840 | YDL185W   | W | TFP1   | 3519 | 3240 | 0 |
| 5841 | YDL187C   | C |        | 371  | 254  | 0 |
| 5842 | YDL189W   | W |        | 1181 | 1123 | 0 |
| 5843 | YDL191W   | W | RPL35A | 2885 | 3472 | 0 |
| 5844 | YDL193W   | W |        | 880  | 929  | 0 |
| 5845 | YDR031W   | W |        | 449  | 488  | 0 |
| 5846 | YDR033W   | W | MRH1   | 2050 | 2137 | 0 |
| 5847 | YDR035W   | W | ARO3   | 1517 | 1561 | 0 |
| 5848 | YDR037W   | W | KRS1   | 3272 | 3601 | 0 |
| 5849 | YDR039C   | C | ENA2   | 549  | 551  | 0 |
| 5850 | YDR041W   | W | RSM10  | 617  | 650  | 0 |
| 5851 | YDR127W   | W | ARO1   | 787  | 823  | 1 |
| 5852 | YDR129C   | C | SAC6   | 2166 | 2622 | 0 |
| 5853 | YDR131C   | C |        | 530  | 464  | 0 |
| 5854 | YDR133C   | C |        | 3098 | 2362 | 0 |
| 5855 | YDR135C   | C | YCF1   | 429  | 358  | 1 |
| 5856 | YDR137W   | W | RGP1   | 744  | 669  | 0 |
| 5857 | YDR223W   | W |        | 461  | 428  | 0 |
| 5858 | YDR225W   | W | HTA1   | 3033 | 1856 | 0 |
| 5859 | YDR227W   | W | SIR4   | 991  | 1047 | 0 |
| 5860 | YDR229W   | W |        | 580  | 702  | 0 |
| 5861 | YDR231C   | C | COX20  | 651  | 629  | 0 |
| 5862 | YDR233C   | C |        | 3849 | 3899 | 0 |
| 5863 | YDR319C   | C |        | 617  | 542  | 0 |
| 5864 | YDR321W   | W | ASP1   | 2033 | 1481 | 0 |
| 5865 | YDR323C   | C | PEP7   | 369  | 308  | 0 |
| 5866 | YDR325W   | W | YCG1   | 426  | 436  | 0 |
| 5867 | YDR327W   | W |        | 797  | 1023 | 0 |
| 5868 | YDR329C   | C | PEX3   | 749  | 697  | 0 |
| 5869 | YDR415C   | C |        | 670  | 655  | 0 |
| 5870 | YDR417C   | C |        | 4240 | 3952 | 0 |
| 5871 | YDR419W   | W | RAD30  | 453  | 437  | 0 |
| 5872 | YDR421W   | W | ARO80  | 395  | 375  | 0 |
| 5873 | YDR423C   | C | CAD1   | 667  | 667  | 0 |
| 5874 | YDR425W   | W |        | 521  | 440  | 0 |
| 5875 | YDR511W   | W | ACN9   | 560  | 567  | 0 |

|      |          |   |       |      |      |   |
|------|----------|---|-------|------|------|---|
| 5876 | YDR513W  | W | TTR1  | 1109 | 1460 | 0 |
| 5877 | YDR515W  | W | SLF1  | 616  | 609  | 0 |
| 5878 | YDR517W  | W | GRH1  | 1256 | 1072 | 0 |
| 5879 | YDR519W  | W | FPR2  | 698  | 673  | 0 |
| 5880 | YDR521W  | W |       | 432  | 319  | 0 |
| 5881 | YAL064W  | W |       | 293  | 199  | 0 |
| 5882 | YAL066W  | W |       | 248  | 167  | 0 |
| 5883 | YAR002AC |   |       | 270  | 175  | 1 |
| 5884 | YAR003W  | W | SWD1  | 345  | 279  | 0 |
| 5885 | YAR008W  | W | SEN34 | 298  | 255  | 0 |
| 5886 | YAR010C  | C |       | 387  | 383  | 0 |
| 5887 | YBL052C  | C | SAS3  | 567  | 569  | 2 |
| 5888 | YBL054W  | W |       | 404  | 594  | 0 |
| 5889 | YBL056W  | W | PTC3  | 1281 | 1292 | 0 |
| 5890 | YBL058W  | W | SHP1  | 1212 | 1796 | 0 |
| 5891 | YBL060W  | W |       | 411  | 457  | 0 |
| 5892 | YBL062W  | W |       | 674  | 816  | 0 |
| 5893 | YBR031W  | W | RPL4A | 4509 | 4252 | 0 |
| 5894 | YBR033W  | W |       | 256  | 185  | 0 |
| 5895 | YBR035C  | C | PDX3  | 589  | 783  | 0 |
| 5896 | YBR037C  | C | SCO1  | 477  | 441  | 0 |
| 5897 | YBR039W  | W | ATP3  | 1181 | 1163 | 0 |
| 5898 | YBR041W  | W | FAT1  | 306  | 229  | 0 |
| 5899 | YBR125C  | C | PTC4  | 658  | 556  | 0 |
| 5900 | YBR127C  | C | VMA2  | 2463 | 2942 | 0 |
| 5901 | YBR129C  | C | OPY1  | 589  | 580  | 0 |
| 5902 | YBR131W  | W | CCZ1  | 395  | 375  | 0 |
| 5903 | YBR133C  | C | HSL7  | 717  | 708  | 0 |
| 5904 | YBR135W  | W | CKS1  | 2046 | 2456 | 0 |
| 5905 | YEL061C  | C | CIN8  | 243  | 176  | 1 |
| 5906 | YEL063C  | C | CAN1  | 475  | 506  | 0 |
| 5907 | YEL065W  | W | SIT1  | 410  | 470  | 0 |
| 5908 | YEL067C  | C |       | 362  | 321  | 0 |
| 5909 | YEL069C  | C | HXT13 | 386  | 305  | 0 |
| 5910 | YEL071W  | W | DLD3  | 1175 | 2963 | 0 |
| 5911 | YER077C  | C |       | 536  | 500  | 0 |
| 5912 | YER079W  | W |       | 588  | 669  | 0 |
| 5913 | YER081W  | W | SER3  | 771  | 767  | 0 |
| 5914 | YER083C  | C |       | 1211 | 1151 | 0 |
| 5915 | YER085C  | C |       | 327  | 220  | 0 |
| 5916 | YER0871C |   |       | 942  | 828  | 0 |
| 5917 | YER172C  | C | BRR2  | 296  | 229  | 1 |
| 5918 | YER174C  | C | GRX4  | 648  | 594  | 0 |
| 5919 | YER176W  | W | ECM32 | 543  | 652  | 0 |
| 5920 | YER178W  | W | PDA1  | 4169 | 5037 | 0 |
| 5921 | YER180C  | C | ISC10 | 530  | 512  | 0 |
| 5922 | YER182W  | W |       | 499  | 492  | 0 |
| 5923 | YFR007W  | W |       | 475  | 421  | 0 |
| 5924 | YFR009W  | W | GCN20 | 1452 | 1429 | 0 |
| 5925 | YFR011C  | C |       | 706  | 774  | 0 |
| 5926 | YFR013W  | W | IOC3  | 894  | 836  | 0 |
| 5927 | YFR015C  | C | GSY1  | 398  | 212  | 0 |

|      |         |   |         |      |      |   |
|------|---------|---|---------|------|------|---|
| 5928 | YFR017C | C |         | 409  | 260  | 0 |
| 5929 | YGL045W | W |         | 459  | 428  | 0 |
| 5930 | YGL047W | W |         | 515  | 623  | 0 |
| 5931 | YGL049C | C | TIF4632 | 1093 | 1091 | 0 |
| 5932 | YGL051W | W |         | 701  | 692  | 0 |
| 5933 | YGL053W | W | PRM8    | 794  | 885  | 0 |
| 5934 | YGL055W | W | OLE1    | 2445 | 2340 | 0 |
| 5935 | YGL141W | W | HUL5    | 287  | 219  | 1 |
| 5936 | YGL143C | C | MRF1    | 548  | 584  | 0 |
| 5937 | YGL145W | W | TIP20   | 614  | 595  | 0 |
| 5938 | YGL147C | C | RPL9A   | 3337 | 3524 | 0 |
| 5939 | YGL149W | W |         | 561  | 523  | 0 |
| 5940 | YGL151W | W | NUT1    | 721  | 743  | 0 |
| 5941 | YGL237C | C | HAP2    | 744  | 731  | 0 |
| 5942 | YGL239C | C |         | 684  | 463  | 0 |
| 5943 | YGL241W | W | KAP114  | 518  | 543  | 0 |
| 5944 | YGL243W | W | TAD1    | 542  | 607  | 0 |
| 5945 | YGL245W | W |         | 3485 | 3760 | 0 |
| 5946 | YGL247W | W |         | 517  | 464  | 0 |
| 5947 | YGR070W | W | ROM1    | 289  | 206  | 1 |
| 5948 | YGR072W | W | UPF3    | 633  | 718  | 0 |
| 5949 | YGR074W | W | SMD1    | 614  | 546  | 0 |
| 5950 | YGR076C | C | MRPL25  | 478  | 458  | 0 |
| 5951 | YGR078C | C | PAC10   | 761  | 863  | 0 |
| 5952 | YGR080W | W | TWF1    | 787  | 819  | 0 |
| 5953 | YGR166W | W | KRE11   | 412  | 422  | 0 |
| 5954 | YGR168C | C |         | 510  | 470  | 0 |
| 5955 | YGR170W | W | PSD2    | 584  | 559  | 0 |
| 5956 | YGR172C | C | YIP1    | 776  | 688  | 0 |
| 5957 | YGR174C | C | CBP4    | 439  | 367  | 0 |
| 5958 | YGR176W | W |         | 434  | 314  | 0 |
| 5959 | YGR262C | C | BUD32   | 657  | 583  | 0 |
| 5960 | YGR264C | C | MES1    | 2371 | 1810 | 0 |
| 5961 | YGR266W | W |         | 727  | 966  | 0 |
| 5962 | YGR268C | C |         | 565  | 564  | 0 |
| 5963 | YGR270W | W | YTA7    | 512  | 669  | 0 |
| 5964 | YGR272C | C |         | 757  | 872  | 0 |
| 5965 | YHR012W | W | VPS29   | 681  | 779  | 0 |
| 5966 | YHR014W | W | SP013   | 247  | 177  | 1 |
| 5967 | YHR016C | C | YSC84   | 478  | 637  | 0 |
| 5968 | YHR018C | C | ARG4    | 953  | 1265 | 0 |
| 5969 | YHR020W | W |         | 1152 | 930  | 0 |
| 5970 | YHR022C | C |         | 427  | 390  | 0 |
| 5971 | YHR106W | W | TRR2    | 648  | 761  | 0 |
| 5972 | YHR108W | W | GGA2    | 1776 | 1690 | 0 |
| 5973 | YHR110W | W | ERP5    | 850  | 874  | 0 |
| 5974 | YHR112C | C |         | 603  | 751  | 0 |
| 5975 | YHR114W | W | BZZ1    | 782  | 849  | 0 |
| 5976 | YHR116W | W |         | 408  | 368  | 0 |
| 5977 | YHR201C | C | PPX1    | 1016 | 1469 | 0 |
| 5978 | YHR203C | C | RPS4B   | 6498 | 6126 | 0 |
| 5979 | YHR205W | W | SCH9    | 1051 | 1067 | 0 |

|      |         |   |       |       |       |   |
|------|---------|---|-------|-------|-------|---|
| 5980 | YHR207C | C | SET5  | 670   | 670   | 0 |
| 5981 | YHR209W | W |       | 396   | 392   | 0 |
| 5982 | YHR211W | W | FL05  | 561   | 507   | 0 |
| 5983 | YIL078W | W | THS1  | 2776  | 2568  | 0 |
| 5984 | YIL080W | W |       | 654   | 849   | 0 |
| 5985 | YIL083C | C |       | 751   | 815   | 0 |
| 5986 | YIL085C | C | KTR7  | 664   | 652   | 0 |
| 5987 | YIL087C | C |       | 382   | 362   | 0 |
| 5988 | YIL089W | W |       | 312   | 237   | 0 |
| 5989 | YIL175W | W |       | 472   | 334   | 0 |
| 5990 | YIL177C | C |       | 1155  | 1247  | 0 |
| 5991 | YIR002C | C | MPH1  | 548   | 651   | 0 |
| 5992 | YIR004W | W | DJP1  | 902   | 959   | 0 |
| 5993 | YIR006C | C | PAN1  | 1300  | 1522  | 1 |
| 5994 | YIR008C | C | PRI1  | 579   | 592   | 0 |
| 5995 | YJL051W | W |       | 543   | 411   | 0 |
| 5996 | YJL053W | W | PEP8  | 610   | 642   | 0 |
| 5997 | YJL055W | W |       | 761   | 1041  | 0 |
| 5998 | YJL057C | C | IKS1  | 417   | 395   | 0 |
| 5999 | YJL059W | W | YHC3  | 452   | 376   | 0 |
| 6000 | YJL061W | W | NUP82 | 304   | 198   | 1 |
| 6001 | YJL147C | C |       | 485   | 479   | 0 |
| 6002 | YJL149W | W |       | 571   | 626   | 0 |
| 6003 | YJL151C | C |       | 797   | 969   | 0 |
| 6004 | YJL153C | C | IN01  | 373   | 277   | 0 |
| 6005 | YJL155C | C | FBP26 | 382   | 363   | 0 |
| 6006 | YJL157C | C | FAR1  | 1745  | 2429  | 0 |
| 6007 | YJR018W | W |       | 734   | 771   | 0 |
| 6008 | YJR020W | W |       | 395   | 328   | 0 |
| 6009 | YJR022W | W | LSM8  | 430   | 383   | 0 |
| 6010 | YJR024C | C |       | 815   | 780   | 0 |
| 6011 | YJR026W | W |       | 9904  | 13190 | 0 |
| 6012 | YJR028W | W |       | 12534 | 15808 | 0 |
| 6013 | YJR115W | W |       | 728   | 641   | 0 |
| 6014 | YJR117W | W | STE24 | 1430  | 1268  | 0 |
| 6015 | YJR119C | C |       | 429   | 391   | 0 |
| 6016 | YJR121W | W | ATP2  | 1301  | 1107  | 1 |
| 6017 | YJR123W | W | RPS5  | 5021  | 4149  | 0 |
| 6018 | YJR125C | C | ENT3  | 660   | 895   | 0 |
| 6019 | YKL048C | C | ELM1  | 464   | 429   | 0 |
| 6020 | YKL050C | C |       | 368   | 272   | 0 |
| 6021 | YKL052C | C | ASK1  | 535   | 510   | 0 |
| 6022 | YKL054C | C | VID31 | 909   | 1378  | 0 |
| 6023 | YKL056C | C |       | 2933  | 2304  | 0 |
| 6024 | YKL058W | W | TOA2  | 748   | 656   | 0 |
| 6025 | YKL143W | W | LTV1  | 758   | 1133  | 0 |
| 6026 | YKL145W | W | RPT1  | 1385  | 2107  | 0 |
| 6027 | YKL147C | C |       | 515   | 420   | 0 |
| 6028 | YKL149C | C | DBR1  | 560   | 563   | 0 |
| 6029 | YKL151C | C |       | 522   | 1086  | 0 |
| 6030 | YKL153W | W |       | 1960  | 3295  | 0 |
| 6031 | YKR014C | C | YPT52 | 915   | 1157  | 0 |

|      |         |   |        |      |      |   |
|------|---------|---|--------|------|------|---|
| 6032 | YKR016W | W |        | 846  | 937  | 0 |
| 6033 | YKR018C | C |        | 1158 | 1516 | 0 |
| 6034 | YKR020W | W |        | 470  | 468  | 0 |
| 6035 | YKR022C | C |        | 536  | 521  | 0 |
| 6036 | YKR024C | C | DBP7   | 729  | 828  | 0 |
| 6037 | YLL004W | W | ORC3   | 321  | 265  | 0 |
| 6038 | YLL006W | W | MMM1   | 584  | 530  | 0 |
| 6039 | YLL008W | W | DRS1   | 812  | 1076 | 0 |
| 6040 | YLL010C | C | PSR1   | 645  | 642  | 0 |
| 6041 | YLL012W | W |        | 385  | 356  | 0 |
| 6042 | YLL014W | W |        | 583  | 555  | 0 |
| 6043 | YLR033W | W | RSC58  | 728  | 708  | 0 |
| 6044 | YLR035C | C | MLH2   | 486  | 423  | 0 |
| 6045 | YLR037C | C | DAN2   | 483  | 362  | 0 |
| 6046 | YLR039C | C | RIC1   | 711  | 776  | 0 |
| 6047 | YLR041W | W |        | 417  | 340  | 0 |
| 6048 | YLR043C | C | TRX1   | 1012 | 978  | 0 |
| 6049 | YLR129W | W | DIP2   | 691  | 888  | 0 |
| 6050 | YLR131C | C | ACE2   | 244  | 172  | 1 |
| 6051 | YLR133W | W | CKI1   | 414  | 423  | 0 |
| 6052 | YLR135W | W | SLX4   | 303  | 252  | 0 |
| 6053 | YLR137W | W |        | 306  | 247  | 0 |
| 6054 | YLR139C | C | SLS1   | 292  | 216  | 0 |
| 6055 | YLR225C | C |        | 663  | 688  | 0 |
| 6056 | YLR227C | C | ADY4   | 488  | 538  | 0 |
| 6057 | YLR229C | C | CDC42  | 1113 | 1032 | 0 |
| 6058 | YLR231C | C |        | 730  | 796  | 0 |
| 6059 | YLR233C | C | EST1   | 425  | 363  | 0 |
| 6060 | YLR235C | C |        | 363  | 276  | 0 |
| 6061 | YLR321C | C | SFH1   | 826  | 821  | 0 |
| 6062 | YLR323C | C |        | 373  | 340  | 0 |
| 6063 | YLR325C | C | RPL38  | 1701 | 1892 | 0 |
| 6064 | YLR327C | C |        | 349  | 303  | 0 |
| 6065 | YLR329W | W | REC102 | 299  | 212  | 0 |
| 6066 | YLR331C | C |        | 521  | 421  | 0 |
| 6067 | YLR417W | W | VPS36  | 515  | 457  | 0 |
| 6068 | YLR419W | W |        | 305  | 249  | 1 |
| 6069 | YLR421C | C | RPN13  | 946  | 1025 | 0 |
| 6070 | YLR423C | C | APG17  | 404  | 358  | 0 |
| 6071 | YLR425W | W | TUS1   | 330  | 263  | 0 |
| 6072 | YLR427W | W |        | 445  | 473  | 0 |
| 6073 | YML055W | W | SPC2   | 782  | 910  | 0 |
| 6074 | YML058W | W | SML1   | 1366 | 1386 | 0 |
| 6075 | YML060W | W | OGG1   | 434  | 477  | 0 |
| 6076 | YML062C | C | MFT1   | 450  | 538  | 0 |
| 6077 | YML064C | C | TEM1   | 466  | 462  | 0 |
| 6078 | YML066C | C | SMA2   | 257  | 195  | 1 |
| 6079 | YMR027W | W | HRT2   | 1006 | 1414 | 0 |
| 6080 | YMR029C | C |        | 571  | 630  | 0 |
| 6081 | YMR031C | C |        | 1150 | 1158 | 0 |
| 6082 | YMR034C | C |        | 357  | 292  | 0 |
| 6083 | YMR036C | C | MIH1   | 383  | 326  | 0 |

|      |         |   |        |      |      |   |
|------|---------|---|--------|------|------|---|
| 6084 | YMR038C | C | LYS7   | 1050 | 1100 | 0 |
| 6085 | YMR122C | C |        | 355  | 236  | 0 |
| 6086 | YMR124W | W |        | 531  | 557  | 0 |
| 6087 | YMR126C | C |        | 465  | 380  | 0 |
| 6088 | YMR128W | W | ECM16  | 353  | 320  | 1 |
| 6089 | YMR130W | W |        | 610  | 593  | 0 |
| 6090 | YMR132C | C |        | 403  | 327  | 0 |
| 6091 | YMR240C | C | CUS1   | 514  | 517  | 0 |
| 6092 | YMR242C | C | RPL20A | 4528 | 4120 | 0 |
| 6093 | YMR244W | W |        | 329  | 219  | 0 |
| 6094 | YMR246W | W | FAA4   | 2512 | 2387 | 0 |
| 6095 | YMR250W | W | GAD1   | 858  | 2646 | 0 |
| 6096 | YMR252C | C |        | 479  | 433  | 0 |
| 6097 | YNL018C | C |        | 306  | 228  | 0 |
| 6098 | YNL020C | C | ARK1   | 717  | 637  | 2 |
| 6099 | YNL022C | C |        | 699  | 863  | 0 |
| 6100 | YNL024C | C |        | 385  | 295  | 0 |
| 6101 | YNL026W | W |        | 548  | 605  | 0 |
| 6102 | YNL028W | W |        | 336  | 220  | 0 |
| 6103 | YNL114C | C |        | 652  | 899  | 0 |
| 6104 | YNL116W | W |        | 679  | 676  | 0 |
| 6105 | YNL118C | C | DCP2   | 708  | 730  | 0 |
| 6106 | YNL120C | C |        | 440  | 405  | 0 |
| 6107 | YNL122C | C |        | 397  | 358  | 0 |
| 6108 | YNL124W | W |        | 559  | 641  | 0 |
| 6109 | YNL210W | W | MER1   | 312  | 217  | 0 |
| 6110 | YNL212W | W | VID27  | 548  | 525  | 0 |
| 6111 | YNL214W | W | PEX17  | 358  | 281  | 0 |
| 6112 | YNL216W | W | RAP1   | 467  | 433  | 0 |
| 6113 | YNL218W | W |        | 410  | 376  | 0 |
| 6114 | YNL220W | W | ADE12  | 1132 | 1012 | 0 |
| 6115 | YNL306W | W | MRPS18 | 847  | 849  | 0 |
| 6116 | YNL308C | C | KRI1   | 1631 | 2262 | 0 |
| 6117 | YNL310C | C |        | 505  | 508  | 0 |
| 6118 | YNL312W | W | RFA2   | 719  | 732  | 0 |
| 6119 | YNL314W | W | DAL82  | 445  | 379  | 0 |
| 6120 | YNL316C | C | PHA2   | 440  | 391  | 0 |
| 6121 | YNR063W | W |        | 311  | 269  | 0 |
| 6122 | YNR065C | C |        | 286  | 245  | 0 |
| 6123 | YNR067C | C | DSE4   | 274  | 209  | 0 |
| 6124 | YNR069C | C |        | 253  | 155  | 1 |
| 6125 | YNR071C | C |        | 277  | 182  | 0 |
| 6126 | YNR073C | C |        | 306  | 177  | 0 |
| 6127 | YOL081W | W | IRA2   | 252  | 168  | 1 |
| 6128 | YOL083W | W |        | 345  | 400  | 0 |
| 6129 | YOL085C | C |        | 286  | 180  | 0 |
| 6130 | YOL087C | C |        | 529  | 465  | 0 |
| 6131 | YOL089C | C | HAL9   | 430  | 388  | 0 |
| 6132 | YOL091W | W | SP021  | 300  | 207  | 0 |
| 6133 | YOR011W | W | AUS1   | 346  | 265  | 0 |
| 6134 | YOR013W | W |        | 411  | 310  | 0 |
| 6135 | YOR015W | W |        | 885  | 772  | 0 |

|      |         |   |        |      |      |   |
|------|---------|---|--------|------|------|---|
| 6136 | YOR017W | W | PET127 | 461  | 444  | 0 |
| 6137 | YOR019W | W |        | 342  | 310  | 0 |
| 6138 | YOR021C | C |        | 892  | 838  | 0 |
| 6139 | YOR107W | W | RGS2   | 410  | 364  | 0 |
| 6140 | YOR109W | W | INP53  | 877  | 963  | 0 |
| 6141 | YOR111W | W |        | 413  | 317  | 0 |
| 6142 | YOR113W | W | AZF1   | 486  | 452  | 0 |
| 6143 | YOR115C | C | TRS33  | 569  | 589  | 0 |
| 6144 | YOR117W | W | RPT5   | 1050 | 1273 | 0 |
| 6145 | YOR203W | W |        | 1108 | 1260 | 0 |
| 6146 | YOR205C | C |        | 562  | 670  | 0 |
| 6147 | YOR207C | C | RET1   | 680  | 732  | 0 |
| 6148 | YOR209C | C | NPT1   | 1178 | 1386 | 0 |
| 6149 | YOR211C | C | MGM1   | 302  | 276  | 1 |
| 6150 | YOR213C | C | SAS5   | 512  | 422  | 0 |
| 6151 | YOR299W | W | BUD7   | 604  | 543  | 0 |
| 6152 | YOR301W | W | RAX1   | 697  | 610  | 0 |
| 6153 | YOR303W | W | CPA1   | 922  | 1395 | 0 |
| 6154 | YOR305W | W |        | 629  | 684  | 0 |
| 6155 | YOR307C | C | SLY41  | 840  | 784  | 0 |
| 6156 | YOR309C | C |        | 2903 | 3035 | 0 |
| 6157 | YPL001W | W | HAT1   | 397  | 404  | 0 |
| 6158 | YPL003W | W | ULA1   | 409  | 381  | 0 |
| 6159 | YPL005W | W |        | 257  | 149  | 1 |
| 6160 | YPL007C | C | TFC8   | 264  | 171  | 1 |
| 6161 | YPL009C | C |        | 259  | 190  | 1 |
| 6162 | YPL011C | C | TAF47  | 313  | 280  | 0 |
| 6163 | YPL097W | W | MSY1   | 331  | 270  | 0 |
| 6164 | YPL099C | C |        | 385  | 348  | 0 |
| 6165 | YPL101W | W | ELP4   | 583  | 541  | 0 |
| 6166 | YPL103C | C |        | 393  | 345  | 0 |
| 6167 | YPL105C | C |        | 411  | 416  | 0 |
| 6168 | YPL107W | W |        | 370  | 329  | 0 |
| 6169 | YPL193W | W | RSA1   | 625  | 721  | 0 |
| 6170 | YPL195W | W | APL5   | 837  | 1133 | 0 |
| 6171 | YPL197C | C |        | 478  | 408  | 1 |
| 6172 | YPL199C | C |        | 626  | 754  | 0 |
| 6173 | YPL201C | C |        | 278  | 184  | 0 |
| 6174 | YPL203W | W | TPK2   | 462  | 459  | 0 |
| 6175 | YPR006C | C | ICL2   | 338  | 287  | 0 |
| 6176 | YPR008W | W | HAA1   | 677  | 800  | 0 |
| 6177 | YPR010C | C | RPA135 | 1161 | 992  | 2 |
| 6178 | YPR012W | W |        | 630  | 509  | 1 |
| 6179 | YPR014C | C |        | 300  | 202  | 0 |
| 6180 | YPR016C | C | TIF6   | 367  | 286  | 0 |
| 6181 | YPR102C | C | RPL11A | 2933 | 3252 | 0 |
| 6182 | YPR104C | C | FHL1   | 580  | 519  | 1 |
| 6183 | YPR106W | W | ISR1   | 720  | 681  | 0 |
| 6184 | YPR108W | W | RPN7   | 1111 | 1765 | 0 |
| 6185 | YPR110C | C | RPC40  | 1256 | 1441 | 0 |
| 6186 | YPR112C | C | MRD1   | 364  | 420  | 0 |
| 6187 | YPR198W | W | SGE1   | 545  | 496  | 0 |

|      |                         |   |        |      |      |   |
|------|-------------------------|---|--------|------|------|---|
| 6188 | YPR200C                 | C | ARR2   | 315  | 211  | 0 |
| 6189 | YPR202W                 | W |        | 1452 | 1105 | 0 |
| 6190 | YPR204W                 | W |        | 1307 | 1467 | 0 |
| 6191 | EMPTY                   |   |        | 250  | 153  | 0 |
| 6192 | EMPTY                   |   |        | 244  | 149  | 0 |
| 6193 | NORF 52                 |   |        | 300  | 238  | 1 |
| 6194 | NORF 56                 |   |        | 713  | 897  | 1 |
| 6195 | NORF 60                 |   |        | 511  | 550  | 1 |
| 6196 | NORF 64                 |   |        | 267  | 217  | 1 |
| 6197 | NORF 68                 |   |        | 447  | 344  | 0 |
| 6198 | NORF 72                 |   |        | 432  | 399  | 0 |
| 6199 | YDL174C                 | C | DLD1   | 681  | 841  | 0 |
| 6200 | YDL180W                 | W |        | 568  | 448  | 0 |
| 6201 | YDL184C                 | C | RPL41A | 653  | 684  | 0 |
| 6202 | YDL231C                 | C | BRE4   | 576  | 481  | 0 |
| 6203 | YDR060W                 | W | MAK21  | 463  | 542  | 0 |
| 6204 | YDR092W                 | W | UBC13  | 703  | 738  | 0 |
| 6205 | YIL065C                 | C | FIS1   | 434  | 418  | 0 |
| 6206 | YIL073C                 | C | SP022  | 354  | 279  | 0 |
| 6207 | YIL095W                 | W | PRK1   | 581  | 543  | 0 |
| 6208 | YIL117C                 | C | PRM5   | 454  | 593  | 0 |
| 6209 | YIL129C                 | C | TA03   | 583  | 446  | 2 |
| 6210 | YIL154C                 | C | IMP2'  | 326  | 248  | 0 |
| 6211 | YNL121C                 | C | TOM70  | 1069 | 1462 | 0 |
| 6212 | YNL172W                 | W | APC1   | 358  | 298  | 2 |
| 6213 | YNL251C                 | C | NRD1   | 913  | 567  | 2 |
| 6214 | YNL271C                 | C | BNI1   | 315  | 266  | 1 |
| 6215 | YNL339C                 | C | YRF1-6 | 367  | 333  | 0 |
| 6216 | YNR031C                 | C | SSK2   | 467  | 491  | 2 |
| 6217 | EMPTY                   |   |        | 323  | 215  | 0 |
| 6218 | EMPTY                   |   |        | 244  | 160  | 0 |
| 6219 | EMPTY                   |   |        | 256  | 212  | 0 |
| 6220 | EMPTY                   |   |        | 256  | 156  | 0 |
| 6221 | EMPTY                   |   |        | 305  | 247  | 0 |
| 6222 | EMPTY                   |   |        | 245  | 158  | 0 |
| 6223 | YHR049C- <del>A</del> C |   |        | 563  | 404  | 0 |
| 6224 | YML133C                 | C |        | 645  | 787  | 0 |
| 6225 | YMR169C                 | C | ALD3   | 504  | 1996 | 0 |
| 6226 | YIL009C- <del>A</del> C |   | EST3   | 554  | 675  | 0 |
| 6227 | YHR005C- <del>A</del> C |   | MRS11  | 724  | 893  | 0 |
| 6228 | YAR002C- <del>A</del> C |   | ERP1   | 825  | 868  | 0 |
| 6229 | EMPTY                   |   |        | 253  | 149  | 0 |
| 6230 | EMPTY                   |   |        | 271  | 158  | 0 |
| 6231 | EMPTY                   |   |        | 266  | 159  | 0 |
| 6232 | EMPTY                   |   |        | 254  | 148  | 0 |
| 6233 | EMPTY                   |   |        | 253  | 143  | 0 |
| 6234 | EMPTY                   |   |        | 250  | 149  | 0 |
| 6235 | YJL005W                 | W | CYR1   | 384  | 307  | 2 |
| 6236 | YJL213W                 | W |        | 351  | 315  | 0 |
| 6237 | YJR151C                 | C | DAN4   | 522  | 561  | 1 |
| 6238 | YKR095W                 | W | MLP1   | 355  | 462  | 0 |
| 6239 | YLL039C                 | C | UBI4   | 459  | 762  | 2 |

|      |                   |   |        |      |      |   |
|------|-------------------|---|--------|------|------|---|
| 6240 | YLR098C           | C | CHA4   | 341  | 277  | 0 |
| 6241 | YMR304C- <i>A</i> | C |        | 1101 | 971  | 0 |
| 6242 | YMR316C- <i>A</i> | C |        | 379  | 299  | 0 |
| 6243 | YMR325W           | W |        | 442  | 354  | 0 |
| 6244 | YOL052C- <i>A</i> | C | DDR2   | 346  | 465  | 0 |
| 6245 | YPL046C           | C | ELC1   | 332  | 312  | 0 |
| 6246 | YPL197C           | C |        | 2782 | 3350 | 0 |
| 6247 | YMR280C           | C | CAT8   | 268  | 196  | 1 |
| 6248 | YNL020C           | C | ARK1   | 595  | 533  | 0 |
| 6249 | YNL207W           | W |        | 359  | 265  | 1 |
| 6250 | YNL243W           | W | SLA2   | 385  | 381  | 1 |
| 6251 | YNL302C           | C | RPS19B | 2334 | 2519 | 0 |
| 6252 | YOL122C           | C | SMF1   | 735  | 663  | 0 |
| 6253 | EMPTY             |   |        | 248  | 150  | 0 |
| 6254 | EMPTY             |   |        | 262  | 148  | 0 |
| 6255 | EMPTY             |   |        | 251  | 153  | 0 |
| 6256 | EMPTY             |   |        | 244  | 154  | 0 |
| 6257 | EMPTY             |   |        | 255  | 151  | 0 |
| 6258 | EMPTY             |   |        | 259  | 151  | 0 |
| 6259 | EMPTY             |   |        | 249  | 152  | 0 |
| 6260 | EMPTY             |   |        | 258  | 164  | 0 |
| 6261 | EMPTY             |   |        | 273  | 169  | 0 |
| 6262 | EMPTY             |   |        | 246  | 157  | 0 |
| 6263 | EMPTY             |   |        | 253  | 159  | 0 |
| 6264 | EMPTY             |   |        | 256  | 148  | 0 |
| 6265 | YDR406W           | W | PDR15  | 241  | 168  | 0 |
| 6266 | YEL032W           | W | MCM3   | 457  | 420  | 0 |
| 6267 | YEL061C           | C | CIN8   | 290  | 202  | 0 |
| 6268 | YER008C           | C | SEC3   | 490  | 511  | 0 |
| 6269 | YER153C           | C | PET122 | 334  | 263  | 0 |
| 6270 | YFL050C           | C | ALR2   | 317  | 282  | 0 |
| 6271 | EMPTY             |   |        | 238  | 145  | 0 |
| 6272 | EMPTY             |   |        | 237  | 149  | 0 |
| 6273 | EMPTY             |   |        | 232  | 145  | 0 |
| 6274 | EMPTY             |   |        | 236  | 154  | 0 |
| 6275 | EMPTY             |   |        | 247  | 157  | 0 |
| 6276 | EMPTY             |   |        | 244  | 144  | 0 |
| 6277 | EMPTY             |   |        | 239  | 140  | 0 |
| 6278 | EMPTY             |   |        | 236  | 147  | 0 |
| 6279 | EMPTY             |   |        | 247  | 149  | 0 |
| 6280 | EMPTY             |   |        | 242  | 146  | 0 |
| 6281 | EMPTY             |   |        | 245  | 147  | 0 |
| 6282 | EMPTY             |   |        | 244  | 148  | 0 |
| 6283 | EMPTY             |   |        | 247  | 149  | 0 |
| 6284 | EMPTY             |   |        | 247  | 149  | 0 |
| 6285 | EMPTY             |   |        | 247  | 155  | 0 |
| 6286 | EMPTY             |   |        | 250  | 157  | 0 |
| 6287 | EMPTY             |   |        | 256  | 159  | 0 |
| 6288 | EMPTY             |   |        | 241  | 158  | 0 |
| 6289 | SS DNA            |   |        | 262  | 159  | 0 |
| 6290 | COT1              |   |        | 252  | 155  | 0 |
| 6291 | POLY A            |   |        | 250  | 153  | 0 |

|              |   |      |     |     |   |
|--------------|---|------|-----|-----|---|
| 6292 PNCA    |   |      | 237 | 150 | 0 |
| 6293 EMPTY   |   |      | 239 | 150 | 0 |
| 6294 EMPTY   |   |      | 249 | 148 | 0 |
| 6295 EMPTY   |   |      | 246 | 150 | 0 |
| 6296 EMPTY   |   |      | 237 | 152 | 0 |
| 6297 EMPTY   |   |      | 232 | 150 | 0 |
| 6298 EMPTY   |   |      | 243 | 154 | 0 |
| 6299 EMPTY   |   |      | 261 | 146 | 0 |
| 6300 EMPTY   |   |      | 243 | 153 | 0 |
| 6301 EMPTY   |   |      | 237 | 142 | 0 |
| 6302 EMPTY   |   |      | 234 | 142 | 0 |
| 6303 EMPTY   |   |      | 238 | 139 | 0 |
| 6304 EMPTY   |   |      | 264 | 141 | 0 |
| 6305 EMPTY   |   |      | 240 | 149 | 0 |
| 6306 EMPTY   |   |      | 261 | 169 | 0 |
| 6307 EMPTY   |   |      | 249 | 145 | 0 |
| 6308 EMPTY   |   |      | 227 | 144 | 0 |
| 6309 EMPTY   |   |      | 252 | 156 | 0 |
| 6310 EMPTY   |   |      | 510 | 292 | 0 |
| 6311 EMPTY   |   |      | 268 | 158 | 0 |
| 6312 EMPTY   |   |      | 253 | 152 | 0 |
| 6313 SS DNA  |   |      | 419 | 357 | 0 |
| 6314 COT1    |   |      | 290 | 178 | 0 |
| 6315 POLY A  |   |      | 273 | 186 | 0 |
| 6316 PNCA    |   |      | 258 | 153 | 0 |
| 6317 EMPTY   |   |      | 246 | 154 | 0 |
| 6318 EMPTY   |   |      | 244 | 159 | 0 |
| 6319 EMPTY   |   |      | 230 | 153 | 0 |
| 6320 EMPTY   |   |      | 291 | 201 | 0 |
| 6321 EMPTY   |   |      | 234 | 147 | 0 |
| 6322 EMPTY   |   |      | 238 | 149 | 0 |
| 6323 EMPTY   |   |      | 240 | 146 | 0 |
| 6324 EMPTY   |   |      | 240 | 140 | 0 |
| 6325 EMPTY   |   |      | 241 | 145 | 0 |
| 6326 EMPTY   |   |      | 249 | 147 | 0 |
| 6327 EMPTY   |   |      | 241 | 170 | 0 |
| 6328 EMPTY   |   |      | 243 | 142 | 0 |
| 6329 EMPTY   |   |      | 257 | 148 | 0 |
| 6330 EMPTY   |   |      | 257 | 155 | 0 |
| 6331 EMPTY   |   |      | 231 | 134 | 0 |
| 6332 EMPTY   |   |      | 253 | 154 | 0 |
| 6333 EMPTY   |   |      | 252 | 146 | 0 |
| 6334 EMPTY   |   |      | 250 | 157 | 0 |
| 6335 EMPTY   |   |      | 242 | 154 | 0 |
| 6336 EMPTY   |   |      | 262 | 152 | 0 |
| 6337 YBR231C | C | AOR1 | 633 | 912 | 0 |
| 6338 YBR233W | W | PBP2 | 705 | 874 | 0 |
| 6339 YBR235W | W |      | 416 | 427 | 0 |
| 6340 YBR237W | W | PRP5 | 473 | 589 | 0 |
| 6341 YBR239C | C |      | 685 | 797 | 0 |
| 6342 YBR241C | C |      | 630 | 941 | 0 |
| 6343 YCL026C |   |      | 408 | 350 | 0 |

|      |         |   |           |      |      |   |
|------|---------|---|-----------|------|------|---|
| 6344 | YCL028W | W | RNQ1      | 2388 | 3305 | 0 |
| 6345 | YCL030C | C | HIS4      | 1500 | 1014 | 0 |
| 6346 | YCL032W | W | STE50     | 708  | 851  | 0 |
| 6347 | YCL034W | W | LSB5      | 1039 | 1271 | 0 |
| 6348 | YCL036W | W |           | 634  | 1299 | 0 |
| 6349 | YCR034W | W | FEN1      | 2001 | 1960 | 0 |
| 6350 | YCR036W | W | RBK1      | 809  | 1219 | 0 |
| 6351 | YCR038C | C | BUD5      | 437  | 442  | 0 |
| 6352 | YCR040W | W | MATALPHA1 | 418  | 352  | 0 |
| 6353 | YCR042C | C | TSM1      | 452  | 476  | 0 |
| 6354 | YCR044C | C | PER1      | 1275 | 1330 | 0 |
| 6355 | YDL002C | C | NHP10     | 851  | 1069 | 0 |
| 6356 | YDL004W | W | ATP16     | 1916 | 1888 | 0 |
| 6357 | YDL006W | W | PTC1      | 758  | 829  | 0 |
| 6358 | YDL008W | W | APC11     | 664  | 687  | 0 |
| 6359 | YDL010W | W |           | 955  | 1038 | 0 |
| 6360 | YDL012C | C |           | 1130 | 1099 | 0 |
| 6361 | YDL098C | C | SNU23     | 522  | 666  | 0 |
| 6362 | YDL100C | C |           | 496  | 707  | 0 |
| 6363 | YDL102W | W | CDC2      | 366  | 312  | 0 |
| 6364 | YDL104C | C | QRI7      | 436  | 459  | 0 |
| 6365 | YDL106C | C | PHO2      | 460  | 509  | 0 |
| 6366 | YDL108W | W | KIN28     | 499  | 586  | 0 |
| 6367 | YDL194W | W | SNF3      | 481  | 437  | 0 |
| 6368 | YDL196W | W |           | 538  | 486  | 0 |
| 6369 | YDL198C | C | YHM1      | 1400 | 1191 | 0 |
| 6370 | YDL200C | C | MGT1      | 600  | 839  | 0 |
| 6371 | YDL202W | W | MRPL11    | 871  | 1123 | 0 |
| 6372 | YDL204W | W |           | 827  | 2626 | 0 |
| 6373 | YDR042C | C |           | 368  | 304  | 0 |
| 6374 | YDR044W | W | HEM13     | 1051 | 851  | 0 |
| 6375 | YDR046C | C | BAP3      | 617  | 668  | 0 |
| 6376 | YDR048C | C |           | 532  | 567  | 0 |
| 6377 | YDR050C | C | TPI1      | 4200 | 5668 | 0 |
| 6378 | YDR052C | C | DBF4      | 370  | 409  | 0 |
| 6379 | YDR138W | W | HPR1      | 658  | 724  | 0 |
| 6380 | YDR140W | W | FYV9      | 1120 | 1341 | 0 |
| 6381 | YDR142C | C | PEX7      | 703  | 630  | 0 |
| 6382 | YDR144C | C | MKC7      | 419  | 393  | 0 |
| 6383 | YDR146C | C | SWI5      | 812  | 768  | 0 |
| 6384 | YDR148C | C | KGD2      | 1790 | 2037 | 0 |
| 6385 | YDR234W | W | LYS4      | 1889 | 1591 | 0 |
| 6386 | YDR250C | C |           | 466  | 373  | 0 |
| 6387 | YDR252W | W | BTT1      | 613  | 600  | 0 |
| 6388 | YDR254W | W | CHL4      | 762  | 803  | 0 |
| 6389 | YDR256C | C | CTA1      | 531  | 507  | 0 |
| 6390 | YDR258C | C | HSP78     | 378  | 399  | 1 |
| 6391 | YDR330W | W |           | 739  | 1006 | 0 |
| 6392 | YDR332W | W |           | 819  | 895  | 0 |
| 6393 | YDR334W | W | SWR1      | 448  | 531  | 0 |
| 6394 | YDR336W | W |           | 647  | 686  | 0 |
| 6395 | YDR338C | C |           | 514  | 491  | 0 |

|      |         |   |        |      |      |   |
|------|---------|---|--------|------|------|---|
| 6396 | YDR340W | W |        | 1042 | 1377 | 0 |
| 6397 | YDR426C | C |        | 467  | 517  | 0 |
| 6398 | YDR428C | C |        | 456  | 565  | 0 |
| 6399 | YDR430C | C |        | 312  | 264  | 0 |
| 6400 | YDR432W | W | NPL3   | 1843 | 2859 | 0 |
| 6401 | YDR434W | W | GPI17  | 403  | 330  | 0 |
| 6402 | YDR436W | W | PPZ2   | 704  | 825  | 0 |
| 6403 | YDR522C | C | SPS2   | 413  | 338  | 0 |
| 6404 | YDR524C | C | AGE1   | 1286 | 1279 | 0 |
| 6405 | YDR526C | C |        | 862  | 1253 | 0 |
| 6406 | YDR528W | W | HLR1   | 1060 | 1298 | 0 |
| 6407 | YDR530C | C | APA2   | 674  | 671  | 0 |
| 6408 | YDR532C | C | KRE28  | 618  | 668  | 0 |
| 6409 | YAR014C | C | BUD14  | 346  | 304  | 1 |
| 6410 | YAR018C | C | KIN3   | 356  | 318  | 0 |
| 6411 | YAR020C | C | PAU7   | 382  | 352  | 0 |
| 6412 | YAR027W | W |        | 877  | 1253 | 0 |
| 6413 | YAR029W | W |        | 357  | 325  | 0 |
| 6414 | YAR031W | W | PRM9   | 433  | 503  | 0 |
| 6415 | YBL063W | W | KIP1   | 489  | 523  | 2 |
| 6416 | YBL065W | W |        | 310  | 265  | 0 |
| 6417 | YBL067C | C | UBP13  | 495  | 613  | 0 |
| 6418 | YBL069W | W | AST1   | 994  | 1342 | 0 |
| 6419 | YBL071C | C |        | 299  | 254  | 1 |
| 6420 | YBL073W | W |        | 465  | 447  | 0 |
| 6421 | YBR042C | C |        | 621  | 769  | 0 |
| 6422 | YBR044C | C | TCM62  | 531  | 624  | 0 |
| 6423 | YBR046C | C | ZTA1   | 405  | 687  | 0 |
| 6424 | YBR048W | W | RPS11B | 2015 | 2259 | 0 |
| 6425 | YBR050C | C | REG2   | 391  | 336  | 0 |
| 6426 | YBR052C | C |        | 1298 | 3089 | 0 |
| 6427 | YBR136W | W | MEC1   | 316  | 299  | 1 |
| 6428 | YBR138C | C | HDR1   | 529  | 540  | 0 |
| 6429 | YBR140C | C | IRA1   | 371  | 353  | 1 |
| 6430 | YBR142W | W | MAK5   | 1186 | 1758 | 0 |
| 6431 | YBR144C | C |        | 337  | 261  | 0 |
| 6432 | YBR146W | W | MRPS9  | 539  | 704  | 0 |
| 6433 | YEL072W | W |        | 413  | 406  | 0 |
| 6434 | YEL074W | W |        | 1352 | 1208 | 0 |
| 6435 | YEL076C | C |        | 767  | 796  | 0 |
| 6436 | YER001W | W | MNN1   | 467  | 594  | 0 |
| 6437 | YER003C | C | PMI40  | 931  | 1076 | 0 |
| 6438 | YER005W | W | YND1   | 540  | 694  | 0 |
| 6439 | YER087W | W |        | 696  | 994  | 0 |
| 6440 | YER089C | C | PTC2   | 389  | 520  | 1 |
| 6441 | YER091C | C | MET6   | 1911 | 5998 | 0 |
| 6442 | YER093C | C |        | 381  | 400  | 1 |
| 6443 | YER095W | W | RAD51  | 1151 | 1433 | 0 |
| 6444 | YER097W | W |        | 401  | 354  | 0 |
| 6445 | YER183C | C | FAU1   | 301  | 257  | 1 |
| 6446 | YER185W | W |        | 486  | 403  | 0 |
| 6447 | YER187W | W |        | 384  | 331  | 0 |

|      |         |   |        |       |       |   |
|------|---------|---|--------|-------|-------|---|
| 6448 | YER189W | W |        | 1039  | 966   | 0 |
| 6449 | YFL-TYA |   |        | 395   | 399   | 1 |
| 6450 | YFL001W | W | DEG1   | 308   | 287   | 1 |
| 6451 | YFR018C | C |        | 623   | 603   | 0 |
| 6452 | YFR020W | W |        | 487   | 442   | 0 |
| 6453 | YFR022W | W |        | 576   | 549   | 0 |
| 6454 | YFR024C | C |        | 1354  | 1971  | 0 |
| 6455 | YFR026C | C |        | 407   | 337   | 0 |
| 6456 | YFR028C | C | CDC14  | 1395  | 1741  | 0 |
| 6457 | YGL056C | C | SDS23  | 976   | 1610  | 0 |
| 6458 | YGL058W | W | RAD6   | 1161  | 1772  | 0 |
| 6459 | YGL060W | W |        | 853   | 1177  | 0 |
| 6460 | YGL062W | W | PYC1   | 560   | 1430  | 0 |
| 6461 | YGL064C | C |        | 635   | 914   | 0 |
| 6462 | YGL066W | W | SGF73  | 357   | 375   | 1 |
| 6463 | YGL152C | C |        | 827   | 1268  | 0 |
| 6464 | YGL154C | C | LYS5   | 765   | 904   | 0 |
| 6465 | YGL156W | W | AMS1   | 491   | 1045  | 0 |
| 6466 | YGL158W | W | RCK1   | 373   | 445   | 0 |
| 6467 | YGL160W | W |        | 931   | 1117  | 0 |
| 6468 | YGL162W | W | SUT1   | 580   | 607   | 0 |
| 6469 | YGL248W | W | PDE1   | 788   | 1244  | 0 |
| 6470 | YGL250W | W |        | 525   | 497   | 0 |
| 6471 | YGL252C | C | RTG2   | 1344  | 1836  | 0 |
| 6472 | YGL254W | W | FZF1   | 586   | 570   | 0 |
| 6473 | YGL256W | W | ADH4   | 1011  | 1064  | 0 |
| 6474 | YGL258W | W |        | 453   | 411   | 0 |
| 6475 | YGR081C | C |        | 804   | 1140  | 0 |
| 6476 | YGR083C | C | GCD2   | 1858  | 2991  | 0 |
| 6477 | YGR085C | C | RPL11B | 4143  | 5496  | 0 |
| 6478 | YGR087C | C | PDC6   | 526   | 418   | 0 |
| 6479 | YGR089W | W |        | 730   | 816   | 0 |
| 6480 | YGR091W | W | PRP31  | 463   | 564   | 0 |
| 6481 | YGR177C | C | ATF2   | 577   | 621   | 0 |
| 6482 | YGR179C | C |        | 662   | 728   | 0 |
| 6483 | YGR181W | W | TIM13  | 1105  | 1489  | 0 |
| 6484 | YGR183C | C | QCR9   | 731   | 733   | 0 |
| 6485 | YGR185C | C | TYS1   | 3828  | 5199  | 0 |
| 6486 | YGR187C | C | HGH1   | 1145  | 2187  | 0 |
| 6487 | YGR273C | C |        | 406   | 357   | 0 |
| 6488 | YGR275W | W | RTT102 | 1040  | 1558  | 0 |
| 6489 | YGR277C | C |        | 870   | 1262  | 0 |
| 6490 | YGR279C | C | SCW4   | 5620  | 6398  | 0 |
| 6491 | YGR281W | W | YOR1   | 527   | 677   | 0 |
| 6492 | YGR283C | C |        | 856   | 1520  | 0 |
| 6493 | YHR023W | W | MYO1   | 409   | 432   | 1 |
| 6494 | YHR025W | W | THR1   | 2330  | 2391  | 0 |
| 6495 | YHR027C | C | RPN1   | 858   | 1354  | 0 |
| 6496 | YHR029C | C |        | 598   | 708   | 0 |
| 6497 | YHR031C | C | RRM3   | 688   | 828   | 0 |
| 6498 | YHR033W | W |        | 611   | 708   | 0 |
| 6499 | YHR117W | W | TOM71  | 31980 | 33200 | 0 |

|      |         |   |       |      |      |   |
|------|---------|---|-------|------|------|---|
| 6500 | YHR119W | W | SET1  | 730  | 905  | 0 |
| 6501 | YHR121W | W |       | 861  | 1232 | 0 |
| 6502 | YHR123W | W | EPT1  | 903  | 1046 | 0 |
| 6503 | YHR125W | W |       | 328  | 260  | 0 |
| 6504 | YHR127W | W | HSN1  | 779  | 951  | 0 |
| 6505 | YHR212C | C |       | 509  | 547  | 0 |
| 6506 | YHR214W | W |       | 873  | 1259 | 0 |
| 6507 | YHR216W | W | IMD2  | 4521 | 3878 | 0 |
| 6508 | YHR218W | W |       | 2178 | 2593 | 0 |
| 6509 | YIL001W | W |       | 455  | 531  | 0 |
| 6510 | YIL003W | W |       | 725  | 976  | 0 |
| 6511 | YIL090W | W |       | 389  | 430  | 0 |
| 6512 | YIL092W | W |       | 586  | 774  | 0 |
| 6513 | YIL094C | C | LYS12 | 1947 | 2630 | 0 |
| 6514 | YIL096C | C |       | 721  | 1133 | 0 |
| 6515 | YIL098C | C | FMC1  | 532  | 730  | 0 |
| 6516 | YIL100W | W |       | 312  | 272  | 1 |
| 6517 | YIR009W | W | MSL1  | 435  | 506  | 0 |
| 6518 | YIR011C | C | STS1  | 861  | 1370 | 0 |
| 6519 | YIR013C | C | GAT4  | 356  | 287  | 0 |
| 6520 | YIR015W | W | RPR2  | 399  | 431  | 0 |
| 6521 | YIR017C | C | MET28 | 432  | 412  | 0 |
| 6522 | YIR019C | C | MUC1  | 301  | 248  | 1 |
| 6523 | YJL062W | W | LAS21 | 569  | 648  | 0 |
| 6524 | YJL064W | W |       | 471  | 584  | 0 |
| 6525 | YJL066C | C | MPM1  | 902  | 1007 | 0 |
| 6526 | YJL068C | C |       | 798  | 1556 | 0 |
| 6527 | YJL070C | C |       | 353  | 353  | 1 |
| 6528 | YJL072C | C |       | 731  | 869  | 0 |
| 6529 | YJL158C | C | CIS3  | 3470 | 5273 | 0 |
| 6530 | YJL160C | C |       | 399  | 390  | 0 |
| 6531 | YJL162C | C |       | 779  | 1340 | 0 |
| 6532 | YJL164C | C | TPK1  | 828  | 1320 | 0 |
| 6533 | YJL166W | W | QCR8  | 834  | 1038 | 0 |
| 6534 | YJL168C | C | SET2  | 518  | 759  | 0 |
| 6535 | YJR029W | W |       | 1800 | 2637 | 2 |
| 6536 | YJR031C | C | GEA1  | 460  | 534  | 0 |
| 6537 | YJR033C | C | RAV1  | 417  | 526  | 0 |
| 6538 | YJR035W | W | RAD26 | 402  | 549  | 0 |
| 6539 | YJR037W | W |       | 393  | 366  | 0 |
| 6540 | YJR039W | W |       | 402  | 337  | 0 |
| 6541 | YJR126C | C |       | 807  | 932  | 0 |
| 6542 | YJR128W | W |       | 386  | 322  | 0 |
| 6543 | YJR130C | C | STR2  | 573  | 631  | 0 |
| 6544 | YJR132W | W | NMD5  | 728  | 761  | 0 |
| 6545 | YJR134C | C | SGM1  | 719  | 957  | 0 |
| 6546 | YJR136C | C |       | 425  | 468  | 0 |
| 6547 | YKL059C | C |       | 650  | 888  | 0 |
| 6548 | YKL061W | W |       | 456  | 463  | 0 |
| 6549 | YKL063C | C |       | 972  | 1345 | 0 |
| 6550 | YKL065C | C | YET1  | 1343 | 2005 | 0 |
| 6551 | YKL067W | W | YNK1  | 972  | 1573 | 0 |

|      |         |   |        |      |      |   |
|------|---------|---|--------|------|------|---|
| 6552 | YKL069W | W |        | 689  | 963  | 0 |
| 6553 | YKL154W | W | SRP102 | 1044 | 1364 | 0 |
| 6554 | YKL156W | W | RPS27A | 1263 | 1877 | 0 |
| 6555 | YKL158W |   |        | 711  | 748  | 0 |
| 6556 | YKL160W | W |        | 1541 | 2508 | 0 |
| 6557 | YKL162C | C |        | 552  | 532  | 0 |
| 6558 | YKL164C | C | PIR1   | 4614 | 7966 | 0 |
| 6559 | YKR025W | W | RPC37  | 1124 | 1960 | 0 |
| 6560 | YKR027W | W |        | 644  | 804  | 0 |
| 6561 | YKR029C | C | SET3   | 841  | 1219 | 0 |
| 6562 | YKR031C | C | SP014  | 450  | 538  | 0 |
| 6563 | YKR033C | C |        | 316  | 292  | 0 |
| 6564 | YKR035C | C |        | 979  | 1545 | 0 |
| 6565 | YLL015W | W | BPT1   | 324  | 298  | 1 |
| 6566 | YLL017W | W | SDC25  | 420  | 390  | 0 |
| 6567 | YLL019C | C | KNS1   | 746  | 1078 | 2 |
| 6568 | YLL021W | W | SPA2   | 567  | 773  | 0 |
| 6569 | YLL023C | C |        | 980  | 1456 | 0 |
| 6570 | YLL025W | W |        | 541  | 553  | 3 |
| 6571 | YLR044C | C | PDC1   | 8683 | 6940 | 0 |
| 6572 | YLR046C | C |        | 746  | 796  | 0 |
| 6573 | YLR048W | W | RPS0B  | 6299 | 5971 | 0 |
| 6574 | YLR050C | C |        | 589  | 673  | 0 |
| 6575 | YLR052W | W | IES3   | 920  | 1220 | 0 |
| 6576 | YLR054C | C |        | 397  | 344  | 0 |
| 6577 | YLR140W | W |        | 478  | 555  | 0 |
| 6578 | YLR142W | W | PUT1   | 421  | 463  | 0 |
| 6579 | YLR144C | C | ACF2   | 828  | 1063 | 0 |
| 6580 | YLR146C | C | SPE4   | 957  | 1042 | 0 |
| 6581 | YLR148W | W | PEP3   | 680  | 920  | 0 |
| 6582 | YLR150W | W | STM1   | 6973 | 9332 | 0 |
| 6583 | YLR236C | C |        | 535  | 628  | 0 |
| 6584 | YLR238W | W |        | 661  | 938  | 0 |
| 6585 | YLR240W | W | VPS34  | 701  | 1026 | 0 |
| 6586 | YLR242C | C | ARV1   | 736  | 857  | 0 |
| 6587 | YLR244C | C | MAP1   | 2840 | 4284 | 0 |
| 6588 | YLR246W | W | ERF2   | 674  | 771  | 0 |
| 6589 | YLR332W | W | MID2   | 1047 | 1195 | 0 |
| 6590 | YLR334C | C |        | 466  | 425  | 0 |
| 6591 | YLR336C | C | SGD1   | 636  | 952  | 0 |
| 6592 | YLR338W | W | KRE21  | 1083 | 1196 | 0 |
| 6593 | YLR340W | W | RPP0   | 6098 | 4818 | 0 |
| 6594 | YLR342W | W | FKS1   | 803  | 740  | 0 |
| 6595 | YLR428C | C |        | 819  | 928  | 0 |
| 6596 | YLR430W | W | SEN1   | 389  | 383  | 1 |
| 6597 | YLR432W | W | IMD3   | 5803 | 4838 | 0 |
| 6598 | YLR434C | C |        | 497  | 527  | 0 |
| 6599 | YLR436C | C | ECM30  | 668  | 853  | 0 |
| 6600 | YLR438W | W | CAR2   | 968  | 3143 | 0 |
| 6601 | YML068W | W |        | 577  | 700  | 0 |
| 6602 | YML070W | W | DAK1   | 2109 | 6259 | 0 |
| 6603 | YML072C | C |        | 919  | 1569 | 0 |

|      |         |   |        |       |       |   |
|------|---------|---|--------|-------|-------|---|
| 6604 | YML075C | C | HMG1   | 523   | 755   | 1 |
| 6605 | YML077W | W | BET5   | 422   | 486   | 1 |
| 6606 | YML079W | W |        | 1507  | 2424  | 0 |
| 6607 | YMR039C | C | SUB1   | 1499  | 2552  | 0 |
| 6608 | YMR041C | C |        | 770   | 948   | 0 |
| 6609 | YMR043W | W | MCM1   | 2012  | 3334  | 0 |
| 6610 | YMR046C | C |        | 7600  | 12231 | 0 |
| 6611 | YMR048W | W | CSM3   | 777   | 1108  | 0 |
| 6612 | YMR051C | C |        | 11524 | 17699 | 0 |
| 6613 | YMR147W | W |        | 719   | 849   | 0 |
| 6614 | YMR149W | W | SWP1   | 2076  | 2318  | 0 |
| 6615 | YMR151W | W | YIM2   | 429   | 386   | 0 |
| 6616 | YMR153W | W | NUP53  | 1043  | 1425  | 0 |
| 6617 | YMR155W | W |        | 814   | 853   | 0 |
| 6618 | YMR157C | C |        | 510   | 543   | 0 |
| 6619 | YMR253C | C |        | 564   | 580   | 0 |
| 6620 | YMR257C | C | PET111 | 664   | 656   | 0 |
| 6621 | YMR259C | C |        | 536   | 603   | 0 |
| 6622 | YMR261C | C | TPS3   | 361   | 352   | 1 |
| 6623 | YMR263W | W | SAP30  | 631   | 824   | 0 |
| 6624 | YMR265C | C |        | 576   | 692   | 0 |
| 6625 | YNL029C | C | KTR5   | 730   | 831   | 0 |
| 6626 | YNL031C | C | HHT2   | 5724  | 5700  | 0 |
| 6627 | YNL033W | W |        | 613   | 689   | 0 |
| 6628 | YNL035C | C |        | 667   | 979   | 0 |
| 6629 | YNL037C | C | IDH1   | 1296  | 3439  | 0 |
| 6630 | YNL039W | W | TFC5   | 1073  | 1717  | 0 |
| 6631 | YNL125C | C | ESBP6  | 845   | 1005  | 0 |
| 6632 | YNL127W | W |        | 608   | 838   | 0 |
| 6633 | YNL129W | W |        | 814   | 1207  | 0 |
| 6634 | YNL131W | W | TOM22  | 1436  | 2293  | 0 |
| 6635 | YNL133C | C | FYV6   | 584   | 837   | 0 |
| 6636 | YNL135C | C | FPR1   | 1922  | 3016  | 0 |
| 6637 | YNL221C | C | POP1   | 581   | 977   | 0 |
| 6638 | YNL223W | W | AUT2   | 488   | 526   | 0 |
| 6639 | YNL225C | C | CNM67  | 555   | 732   | 0 |
| 6640 | YNL227C | C |        | 756   | 1243  | 0 |
| 6641 | YNL229C | C | URE2   | 797   | 1215  | 0 |
| 6642 | YNL231C | C | PDR16  | 1016  | 1744  | 0 |
| 6643 | YNL317W | W | PFS2   | 702   | 877   | 0 |
| 6644 | YNL319W | W |        | 368   | 321   | 0 |
| 6645 | YNL321W | W |        | 893   | 929   | 0 |
| 6646 | YNL323W | W | LEM3   | 1051  | 1413  | 0 |
| 6647 | YNL325C | C | FIG4   | 884   | 936   | 0 |
| 6648 | YNL327W | W | EGT2   | 1002  | 1393  | 0 |
| 6649 | YNR074C | C |        | 678   | 897   | 0 |
| 6650 | YNR076W | W | PAU6   | 755   | 828   | 0 |
| 6651 | YOL001W | W | PHO80  | 730   | 830   | 0 |
| 6652 | YOL003C | C |        | 713   | 910   | 0 |
| 6653 | YOL005C | C | RPB11  | 1105  | 1653  | 0 |
| 6654 | YOL007C | C | CSI2   | 1028  | 1521  | 0 |
| 6655 | YOL092W | W |        | 2201  | 2282  | 0 |

|      |         |   |        |      |      |   |
|------|---------|---|--------|------|------|---|
| 6656 | YOL094C | C | RFC4   | 900  | 1245 | 0 |
| 6657 | YOL096C | C | COQ3   | 604  | 698  | 0 |
| 6658 | YOL098C | C |        | 997  | 1435 | 0 |
| 6659 | YOL100W | W | PKH2   | 540  | 773  | 0 |
| 6660 | YOL102C | C | TPT1   | 653  | 808  | 0 |
| 6661 | YOR022C | C |        | 800  | 855  | 0 |
| 6662 | YOR024W | W |        | 368  | 329  | 0 |
| 6663 | YOR026W | W | BUB3   | 1545 | 973  | 0 |
| 6664 | YOR028C | C | CIN5   | 540  | 431  | 0 |
| 6665 | YOR030W | W | DFG16  | 417  | 419  | 0 |
| 6666 | YOR032C | C | HMS1   | 407  | 381  | 0 |
| 6667 | YOR118W | W |        | 760  | 1013 | 0 |
| 6668 | YOR120W | W | GCY1   | 709  | 1445 | 0 |
| 6669 | YOR122C | C | PFY1   | 1262 | 1817 | 0 |
| 6670 | YOR124C | C | UBP2   | 774  | 1417 | 2 |
| 6671 | YOR126C | C | IAH1   | 575  | 595  | 0 |
| 6672 | YOR128C | C | ADE2   | 1074 | 1473 | 0 |
| 6673 | YOR214C | C |        | 446  | 394  | 0 |
| 6674 | YOR216C | C | RUD3   | 952  | 1694 | 0 |
| 6675 | YOR218C | C |        | 985  | 1362 | 0 |
| 6676 | YOR220W | W |        | 780  | 1100 | 0 |
| 6677 | YOR222W | W | ODC2   | 932  | 894  | 0 |
| 6678 | YOR224C | C | RPB8   | 2131 | 2581 | 0 |
| 6679 | YOR310C | C | NOP58  | 3785 | 5037 | 0 |
| 6680 | YOR312C | C | RPL20B | 3066 | 3865 | 0 |
| 6681 | YOR314W | W |        | 394  | 343  | 0 |
| 6682 | YOR316C | C | COT1   | 840  | 1065 | 0 |
| 6683 | YOR318C | C |        | 443  | 399  | 0 |
| 6684 | YOR320C | C |        | 779  | 1176 | 0 |
| 6685 | YPL012W | W | RRP12  | 332  | 313  | 1 |
| 6686 | YPL014W | W |        | 422  | 408  | 0 |
| 6687 | YPL016W | W | SWI1   | 332  | 288  | 1 |
| 6688 | YPL018W | W | CTF19  | 473  | 574  | 0 |
| 6689 | YPL020C | C | ULP1   | 422  | 449  | 0 |
| 6690 | YPL022W | W | RAD1   | 427  | 511  | 1 |
| 6691 | YPL108W | W |        | 577  | 679  | 0 |
| 6692 | YPL110C | C |        | 349  | 354  | 0 |
| 6693 | YPL112C | C |        | 416  | 393  | 0 |
| 6694 | YPL114W | W |        | 381  | 358  | 0 |
| 6695 | YPL116W | W | HOS3   | 831  | 912  | 0 |
| 6696 | YPL118W | W | MRP51  | 874  | 1344 | 0 |
| 6697 | YPL204W | W | HRR25  | 1257 | 2541 | 0 |
| 6698 | YPL206C | C |        | 1645 | 2159 | 0 |
| 6699 | YPL208W | W |        | 447  | 538  | 0 |
| 6700 | YPL210C | C | SRP72  | 415  | 504  | 1 |
| 6701 | YPL212C | C | PUS1   | 782  | 1390 | 0 |
| 6702 | YPL214C | C | THI6   | 825  | 1100 | 0 |
| 6703 | YPR017C | C | DSS4   | 674  | 745  | 0 |
| 6704 | YPR019W | W | CDC54  | 601  | 911  | 0 |
| 6705 | YPR021C | C |        | 482  | 610  | 0 |
| 6706 | YPR023C | C | EAF3   | 1498 | 2044 | 0 |
| 6707 | YPR025C | C | CCL1   | 868  | 1212 | 0 |

|      |                         |   |        |      |      |   |
|------|-------------------------|---|--------|------|------|---|
| 6708 | YPR027C                 | C |        | 657  | 544  | 0 |
| 6709 | YPR113W                 | W | PIS1   | 1313 | 1687 | 0 |
| 6710 | YPR115W                 | W |        | 352  | 323  | 1 |
| 6711 | YPR117W                 | W |        | 423  | 395  | 1 |
| 6712 | YPR119W                 | W | CLB2   | 1611 | 1558 | 0 |
| 6713 | YPR121W                 | W | THI22  | 1986 | 1657 | 0 |
| 6714 | YPR123C                 | C |        | 652  | 1019 | 0 |
| 6715 | EMPTY                   |   |        | 643  | 805  | 0 |
| 6716 | EMPTY                   |   |        | 417  | 391  | 0 |
| 6717 | EMPTY                   |   |        | 353  | 324  | 0 |
| 6718 | EMPTY                   |   |        | 322  | 293  | 0 |
| 6719 | EMPTY                   |   |        | 318  | 285  | 0 |
| 6720 | EMPTY                   |   |        | 330  | 279  | 0 |
| 6721 | NORF 73                 |   |        | 2463 | 3681 | 0 |
| 6722 | NORF 77                 |   |        | 722  | 882  | 0 |
| 6723 | NORF 81                 |   |        | 512  | 561  | 0 |
| 6724 | NORF 85                 |   |        | 748  | 745  | 0 |
| 6725 | NORF 89                 |   |        | 1251 | 1247 | 0 |
| 6726 | NORF 93                 |   |        | 1052 | 1083 | 0 |
| 6727 | YDR093W                 | W | DNF2   | 537  | 607  | 1 |
| 6728 | YDR128W                 | W |        | 754  | 1164 | 2 |
| 6729 | YDR150W                 | W | NUM1   | 750  | 1096 | 1 |
| 6730 | YDR215C                 | C |        | 387  | 327  | 0 |
| 6731 | YDR258C                 | C | HSP78  | 730  | 1249 | 0 |
| 6732 | YDR285W                 | W | ZIP1   | 446  | 478  | 2 |
| 6733 | YIL155C                 | C | GUT2   | 768  | 1077 | 0 |
| 6734 | YIR006C                 | C | PAN1   | 2573 | 3469 | 2 |
| 6735 | YIR032C                 | C | DAL3   | 447  | 461  | 0 |
| 6736 | YJL073W                 | W | JEM1   | 839  | 1192 | 2 |
| 6737 | YJL113W                 | W |        | 521  | 490  | 1 |
| 6738 | YJL127C                 | C | SPT10  | 747  | 948  | 0 |
| 6739 | YNR040W                 | W |        | 709  | 813  | 0 |
| 6740 | YNR069C                 | C |        | 593  | 548  | 0 |
| 6741 | YOL016C                 | C | CMK2   | 741  | 1012 | 0 |
| 6742 | YOL051W                 | W | GAL11  | 875  | 1436 | 2 |
| 6743 | YOL081W                 | W | IRA2   | 586  | 831  | 1 |
| 6744 | YOR012W                 | W |        | 458  | 469  | 0 |
| 6745 | EMPTY                   |   |        | 441  | 432  | 0 |
| 6746 | EMPTY                   |   |        | 439  | 398  | 0 |
| 6747 | EMPTY                   |   |        | 425  | 405  | 0 |
| 6748 | EMPTY                   |   |        | 419  | 416  | 0 |
| 6749 | EMPTY                   |   |        | 435  | 483  | 0 |
| 6750 | EMPTY                   |   |        | 480  | 422  | 0 |
| 6751 | YGL226C- <del>A</del> C |   | OST5   | 644  | 762  | 0 |
| 6752 | YER060W- <del>A</del> W |   | FCY22  | 1411 | 2217 | 0 |
| 6753 | YLR312W- <del>A</del> W |   | MRPL15 | 795  | 1027 | 0 |
| 6754 | YML010C- <del>E</del> C |   |        | 673  | 849  | 0 |
| 6755 | YOR008C- <del>A</del> C |   | KIM1   | 401  | 366  | 0 |
| 6756 | YBR286W-50              |   |        | 4418 | 8359 | 0 |
| 6757 | EMPTY                   |   |        | 393  | 368  | 0 |
| 6758 | EMPTY                   |   |        | 403  | 368  | 0 |
| 6759 | EMPTY                   |   |        | 454  | 435  | 0 |

|      |              |   |       |      |      |   |
|------|--------------|---|-------|------|------|---|
| 6760 | EMPTY        |   | 519   | 493  | 0    |   |
| 6761 | EMPTY        |   | 584   | 568  | 0    |   |
| 6762 | EMPTY        |   | 603   | 591  | 0    |   |
| 6763 | YLR305C      | C | STT4  | 603  | 614  | 1 |
| 6764 | YLR384C      | C | IKI3  | 680  | 755  | 1 |
| 6765 | YLR422W      | W |       | 572  | 650  | 0 |
| 6766 | YML049C      | C | RSE1  | 466  | 514  | 0 |
| 6767 | YML072C      | C |       | 494  | 606  | 0 |
| 6768 | YMR109W      | W | MY05  | 581  | 839  | 2 |
| 6769 | YPR012W      | W |       | 531  | 627  | 0 |
| 6770 | YPR052C      | C | NHP6A | 1782 | 2187 | 0 |
| 6771 | YBR286W-800  |   |       | 478  | 614  | 1 |
| 6772 | YBR286W-900  |   |       | 485  | 577  | 1 |
| 6773 | YBR286W-1000 |   |       | 453  | 477  | 1 |
| 6774 | YBR286W-1100 |   |       | 436  | 446  | 1 |
| 6775 | YOR048C      | C | RAT1  | 1327 | 2102 | 0 |
| 6776 | YOR266W      | W | PNT1  | 541  | 652  | 0 |
| 6777 | YOR273C      | C |       | 755  | 516  | 0 |
| 6778 | YOR334W      | W | MRS2  | 864  | 854  | 0 |
| 6779 | YOR336W      | W | KRE5  | 568  | 838  | 2 |
| 6780 | YOR338W      | W |       | 523  | 1299 | 0 |
| 6781 | EMPTY        |   |       | 436  | 522  | 0 |
| 6782 | EMPTY        |   |       | 436  | 420  | 0 |
| 6783 | EMPTY        |   |       | 470  | 468  | 0 |
| 6784 | EMPTY        |   |       | 531  | 510  | 0 |
| 6785 | EMPTY        |   |       | 595  | 624  | 0 |
| 6786 | EMPTY        |   |       | 632  | 658  | 0 |
| 6787 | EMPTY        |   |       | 689  | 687  | 0 |
| 6788 | EMPTY        |   |       | 710  | 741  | 0 |
| 6789 | EMPTY        |   |       | 701  | 748  | 0 |
| 6790 | EMPTY        |   |       | 592  | 622  | 0 |
| 6791 | EMPTY        |   |       | 483  | 389  | 0 |
| 6792 | EMPTY        |   |       | 355  | 333  | 0 |
| 6793 | YGL086W      | W | MAD1  | 710  | 1147 | 0 |
| 6794 | YGL167C      | C | PMR1  | 1150 | 1794 | 0 |
| 6795 | YGL214W      | W |       | 590  | 745  | 0 |
| 6796 | YGR071C      | C |       | 527  | 614  | 0 |
| 6797 | YGR159C      | C | NSR1  | 2599 | 4759 | 0 |
| 6798 | YHR016C      | C | YSC84 | 509  | 875  | 0 |
| 6799 | EMPTY        |   |       | 400  | 421  | 0 |
| 6800 | EMPTY        |   |       | 419  | 384  | 0 |
| 6801 | EMPTY        |   |       | 405  | 386  | 0 |
| 6802 | EMPTY        |   |       | 415  | 369  | 0 |
| 6803 | EMPTY        |   |       | 402  | 377  | 0 |
| 6804 | EMPTY        |   |       | 426  | 432  | 0 |
| 6805 | EMPTY        |   |       | 418  | 391  | 0 |
| 6806 | EMPTY        |   |       | 444  | 434  | 0 |
| 6807 | EMPTY        |   |       | 491  | 489  | 0 |
| 6808 | EMPTY        |   |       | 538  | 561  | 0 |
| 6809 | EMPTY        |   |       | 614  | 665  | 0 |
| 6810 | EMPTY        |   |       | 682  | 716  | 0 |
| 6811 | EMPTY        |   |       | 743  | 786  | 0 |

|                  |     |     |   |
|------------------|-----|-----|---|
| 6812 EMPTY       | 831 | 865 | 0 |
| 6813 EMPTY       | 817 | 820 | 0 |
| 6814 EMPTY       | 708 | 748 | 0 |
| 6815 EMPTY       | 618 | 621 | 0 |
| 6816 EMPTY       | 423 | 421 | 0 |
| 6817 3XSSC       | 474 | 482 | 0 |
| 6818 E. COLI #29 | 478 | 480 | 0 |
| 6819 E. COLI #35 | 478 | 463 | 0 |
| 6820 E. COLI #38 | 464 | 460 | 0 |
| 6821 3XSSC       | 438 | 438 | 0 |
| 6822 3XSSC       | 434 | 421 | 0 |
| 6823 EMPTY       | 420 | 411 | 0 |
| 6824 EMPTY       | 429 | 401 | 0 |
| 6825 EMPTY       | 427 | 422 | 0 |
| 6826 EMPTY       | 421 | 406 | 0 |
| 6827 EMPTY       | 429 | 418 | 0 |
| 6828 EMPTY       | 442 | 416 | 0 |
| 6829 EMPTY       | 442 | 432 | 0 |
| 6830 EMPTY       | 458 | 467 | 0 |
| 6831 EMPTY       | 512 | 525 | 0 |
| 6832 EMPTY       | 581 | 592 | 0 |
| 6833 EMPTY       | 654 | 662 | 0 |
| 6834 EMPTY       | 698 | 758 | 0 |
| 6835 EMPTY       | 772 | 821 | 0 |
| 6836 EMPTY       | 835 | 880 | 0 |
| 6837 EMPTY       | 781 | 888 | 0 |
| 6838 EMPTY       | 789 | 840 | 0 |
| 6839 EMPTY       | 663 | 706 | 0 |
| 6840 EMPTY       | 542 | 568 | 0 |
| 6841 3XSSC       | 794 | 784 | 0 |
| 6842 E. COLI #29 | 507 | 515 | 0 |
| 6843 E. COLI #35 | 492 | 482 | 0 |
| 6844 E. COLI #38 | 470 | 445 | 0 |
| 6845 3XSSC       | 485 | 507 | 0 |
| 6846 3XSSC       | 456 | 443 | 0 |
| 6847 EMPTY       | 450 | 528 | 0 |
| 6848 EMPTY       | 493 | 560 | 0 |
| 6849 EMPTY       | 431 | 416 | 0 |
| 6850 EMPTY       | 429 | 432 | 0 |
| 6851 EMPTY       | 436 | 430 | 0 |
| 6852 EMPTY       | 444 | 420 | 0 |
| 6853 EMPTY       | 452 | 446 | 0 |
| 6854 EMPTY       | 478 | 484 | 0 |
| 6855 EMPTY       | 516 | 517 | 0 |
| 6856 EMPTY       | 607 | 601 | 0 |
| 6857 EMPTY       | 653 | 671 | 0 |
| 6858 EMPTY       | 687 | 713 | 0 |
| 6859 EMPTY       | 785 | 847 | 0 |
| 6860 EMPTY       | 831 | 893 | 0 |
| 6861 EMPTY       | 871 | 913 | 0 |
| 6862 EMPTY       | 792 | 892 | 0 |
| 6863 EMPTY       | 766 | 856 | 0 |

|      |         |   |       |      |      |   |
|------|---------|---|-------|------|------|---|
| 6864 | EMPTY   |   | 655   | 681  | 0    |   |
| 6865 | YBR243C | C | ALG7  | 868  | 838  | 0 |
| 6866 | YBR245C | C | ISW1  | 404  | 411  | 1 |
| 6867 | YBR247C | C | ENP1  | 827  | 1267 | 0 |
| 6868 | YBR249C | C | ARO4  | 2153 | 1823 | 0 |
| 6869 | YBR251W | W | MRPS5 | 636  | 641  | 0 |
| 6870 | YBR253W | W | SRB6  | 745  | 845  | 0 |
| 6871 | YCL038C | C | AUT4  | 398  | 409  | 0 |
| 6872 | YCL040W | W | GLK1  | 2418 | 5164 | 0 |
| 6873 | YCL042W | W |       | 1087 | 1667 | 0 |
| 6874 | YCL044C | C |       | 865  | 913  | 0 |
| 6875 | YCL046W | W |       | 668  | 520  | 0 |
| 6876 | YCL048W | W |       | 429  | 389  | 0 |
| 6877 | YCR046C | C | IMG1  | 800  | 1072 | 0 |
| 6878 | YCR048W | W | ARE1  | 419  | 388  | 0 |
| 6879 | YCR050C | C |       | 430  | 367  | 0 |
| 6880 | YCR052W | W | RSC6  | 1130 | 1411 | 0 |
| 6881 | YCR054C | C | CTR86 | 414  | 379  | 0 |
| 6882 | YCR056W |   |       | 733  | 734  | 0 |
| 6883 | YDL014W | W | NOP1  | 863  | 770  | 0 |
| 6884 | YDL016C | C |       | 950  | 1014 | 0 |
| 6885 | YDL018C | C | ERP3  | 650  | 709  | 0 |
| 6886 | YDL020C | C | RPN4  | 788  | 731  | 0 |
| 6887 | YDL022W | W | GPD1  | 4833 | 3242 | 0 |
| 6888 | YDL024C | C | DIA3  | 356  | 291  | 0 |
| 6889 | YDL110C | C |       | 360  | 370  | 0 |
| 6890 | YDL112W | W | TRM3  | 315  | 237  | 1 |
| 6891 | YDL114W | W |       | 317  | 227  | 0 |
| 6892 | YDL116W | W | NUP84 | 328  | 295  | 0 |
| 6893 | YDL118W | W |       | 325  | 297  | 0 |
| 6894 | YDL120W | W | YFH1  | 363  | 394  | 0 |
| 6895 | YDL206W | W |       | 295  | 232  | 0 |
| 6896 | YDL208W | W | NHP2  | 287  | 226  | 0 |
| 6897 | YDL210W | W | UGA4  | 293  | 228  | 0 |
| 6898 | YDL212W | W | SHR3  | 279  | 213  | 0 |
| 6899 | YDL214C | C | PRR2  | 275  | 196  | 0 |
| 6900 | YDL216C | C | RRI1  | 281  | 208  | 0 |
| 6901 | YDR054C | C | CDC34 | 770  | 1005 | 0 |
| 6902 | YDR056C | C |       | 874  | 1049 | 0 |
| 6903 | YDR058C | C | TGL2  | 349  | 305  | 0 |
| 6904 | YDR060W | W | MAK21 | 350  | 289  | 1 |
| 6905 | YDR062W | W | LCB2  | 745  | 753  | 0 |
| 6906 | YDR064W | W | RPS13 | 1443 | 1347 | 0 |
| 6907 | YDR150W | W | NUM1  | 326  | 264  | 1 |
| 6908 | YDR152W | W |       | 1342 | 1590 | 0 |
| 6909 | YDR154C | C |       | 4879 | 8239 | 0 |
| 6910 | YDR156W | W | RPA14 | 961  | 1201 | 0 |
| 6911 | YDR158W | W | HOM2  | 2502 | 2516 | 0 |
| 6912 | YDR160W | W | SSY1  | 648  | 565  | 0 |
| 6913 | YDR260C | C | SWM1  | 598  | 669  | 0 |
| 6914 | YDR262W | W |       | 959  | 1080 | 0 |
| 6915 | YDR263C | C | DIN7  | 493  | 428  | 0 |

|      |         |   |        |      |      |   |
|------|---------|---|--------|------|------|---|
| 6916 | YDR264C | C | AKR1   | 912  | 1193 | 0 |
| 6917 | YDR265W | W | PEX10  | 462  | 493  | 0 |
| 6918 | YDR266C | C |        | 1297 | 1833 | 0 |
| 6919 | YDR342C | C | HXT7   | 1918 | 2076 | 0 |
| 6920 | YDR344C | C |        | 394  | 266  | 0 |
| 6921 | YDR346C | C |        | 1445 | 1722 | 0 |
| 6922 | YDR348C | C |        | 1062 | 1112 | 0 |
| 6923 | YDR350C | C | TCM10  | 565  | 538  | 0 |
| 6924 | YDR352W | W |        | 812  | 747  | 0 |
| 6925 | YDR438W | W |        | 490  | 423  | 0 |
| 6926 | YDR440W | W | DOT1   | 727  | 820  | 0 |
| 6927 | YDR442W | W |        | 548  | 478  | 0 |
| 6928 | YDR444W | W |        | 728  | 682  | 0 |
| 6929 | YDR446W | W | ECM11  | 409  | 298  | 0 |
| 6930 | YDR448W | W | ADA2   | 881  | 974  | 0 |
| 6931 | YDR534C | C | FIT1   | 375  | 291  | 0 |
| 6932 | YDR536W | W | STL1   | 433  | 304  | 0 |
| 6933 | YDR538W | W | PAD1   | 592  | 457  | 0 |
| 6934 | YDR540C | C |        | 361  | 303  | 0 |
| 6935 | YDR542W | W |        | 736  | 565  | 0 |
| 6936 | YDR544C | C |        | 1965 | 1462 | 0 |
| 6937 | YAR035W | W | YAT1   | 300  | 221  | 0 |
| 6938 | YAR040C |   |        | 297  | 240  | 0 |
| 6939 | YAR043C |   |        | 407  | 405  | 0 |
| 6940 | YAR047C | C |        | 302  | 237  | 0 |
| 6941 | YAR052C |   |        | 384  | 337  | 0 |
| 6942 | YAR060C | C |        | 324  | 287  | 0 |
| 6943 | YBL075C | C | SSA3   | 367  | 422  | 0 |
| 6944 | YBL077W | W |        | 2433 | 2703 | 0 |
| 6945 | YBL079W | W | NUP170 | 347  | 278  | 2 |
| 6946 | YBL081W | W |        | 2653 | 2367 | 0 |
| 6947 | YBL083C | C |        | 656  | 566  | 0 |
| 6948 | YBL085W | W | BOI1   | 279  | 195  | 1 |
| 6949 | YBR054W | W | YR02   | 2032 | 2680 | 0 |
| 6950 | YBR056W | W |        | 520  | 965  | 0 |
| 6951 | YBR058C | C | UBP14  | 425  | 445  | 0 |
| 6952 | YBR060C | C | ORC2   | 534  | 587  | 0 |
| 6953 | YBR062C | C |        | 459  | 577  | 0 |
| 6954 | YBR064W | W |        | 448  | 461  | 0 |
| 6955 | YBR148W | W | YSW1   | 314  | 250  | 0 |
| 6956 | YBR150C | C | TBS1   | 448  | 424  | 0 |
| 6957 | YBR152W | W | SPP381 | 528  | 511  | 0 |
| 6958 | YBR154C | C | RPB5   | 1516 | 2088 | 0 |
| 6959 | YBR156C | C | SLI15  | 681  | 1006 | 2 |
| 6960 | YBR158W | W | CST13  | 1389 | 2110 | 0 |
| 6961 | YER007W | W | PAC2   | 352  | 337  | 0 |
| 6962 | YER009W | W | NTF2   | 993  | 1070 | 0 |
| 6963 | YER011W | W | TIR1   | 291  | 226  | 1 |
| 6964 | YER013W | W | PRP22  | 360  | 361  | 1 |
| 6965 | YER015W | W | FAA2   | 314  | 231  | 0 |
| 6966 | YER017C | C | AFG3   | 326  | 283  | 1 |
| 6967 | YER099C | C | PRS2   | 933  | 1086 | 0 |

|      |         |   |        |      |      |   |
|------|---------|---|--------|------|------|---|
| 6968 | YER101C | C | AST2   | 514  | 512  | 0 |
| 6969 | YER103W | W | SSA4   | 840  | 1749 | 0 |
| 6970 | YER105C | C | NUP157 | 587  | 621  | 0 |
| 6971 | YER107C | C | GLE2   | 1013 | 1187 | 0 |
| 6972 | YER109C | C | FL08   | 785  | 915  | 0 |
| 6973 | YFL003C | C | MSH4   | 372  | 309  | 0 |
| 6974 | YFL005W | W | SEC4   | 1246 | 1341 | 0 |
| 6975 | YFL007W | W | BLM3   | 365  | 328  | 0 |
| 6976 | YFL009W | W | CDC4   | 738  | 807  | 0 |
| 6977 | YFL010C | C |        | 1361 | 2283 | 0 |
| 6978 | YFL012W | W |        | 338  | 260  | 0 |
| 6979 | YFR030W | W | MET10  | 727  | 824  | 0 |
| 6980 | YFR031C | C | SMC2   | 571  | 683  | 0 |
| 6981 | YFR033C | C | QCR6   | 1256 | 1528 | 0 |
| 6982 | YFR035C | C |        | 573  | 592  | 0 |
| 6983 | YFR037C | C | RSC8   | 1338 | 1741 | 0 |
| 6984 | YFR039C | C |        | 798  | 860  | 0 |
| 6985 | YGL068W | W |        | 995  | 1260 | 0 |
| 6986 | YGL070C | C | RPB9   | 719  | 811  | 0 |
| 6987 | YGL072C | C |        | 574  | 645  | 0 |
| 6988 | YGL074C | C |        | 441  | 439  | 0 |
| 6989 | YGL076C | C | RPL7A  | 1806 | 2084 | 0 |
| 6990 | YGL078C | C | DBP3   | 1437 | 2071 | 0 |
| 6991 | YGL164C | C |        | 590  | 697  | 0 |
| 6992 | YGL166W | W | CUP2   | 478  | 497  | 0 |
| 6993 | YGL168W | W |        | 848  | 885  | 0 |
| 6994 | YGL170C | C | SP074  | 353  | 282  | 0 |
| 6995 | YGL172W | W | NUP49  | 1094 | 1249 | 0 |
| 6996 | YGL174W | W | BUD13  | 587  | 675  | 0 |
| 6997 | YGL260W | W |        | 408  | 334  | 0 |
| 6998 | YGL262W | W |        | 354  | 247  | 0 |
| 6999 | YGR001C | C |        | 856  | 964  | 0 |
| 7000 | YGR003W | W |        | 555  | 615  | 0 |
| 7001 | YGR005C | C | TFG2   | 932  | 1205 | 0 |
| 7002 | YGR007W | W | MUQ1   | 1104 | 1301 | 0 |
| 7003 | YGR093W | W |        | 724  | 898  | 0 |
| 7004 | YGR095C | C | RRP46  | 779  | 953  | 0 |
| 7005 | YGR097W | W | ASK10  | 403  | 481  | 1 |
| 7006 | YGR099W | W | TEL2   | 525  | 467  | 0 |
| 7007 | YGR101W | W |        | 601  | 605  | 0 |
| 7008 | YGR103W | W | RRP13  | 2335 | 2553 | 0 |
| 7009 | YGR189C | C | CRH1   | 2117 | 3599 | 0 |
| 7010 | YGR191W | W | HIP1   | 1281 | 1637 | 0 |
| 7011 | YGR193C | C | PDX1   | 735  | 1011 | 0 |
| 7012 | YGR195W | W | SKI6   | 718  | 935  | 0 |
| 7013 | YGR197C | C | SNG1   | 418  | 369  | 0 |
| 7014 | YGR199W | W | PMT6   | 761  | 988  | 0 |
| 7015 | YGR285C | C | ZU01   | 3882 | 4727 | 0 |
| 7016 | YGR287C | C |        | 426  | 388  | 0 |
| 7017 | YGR289C | C | MAL11  | 3515 | 2473 | 0 |
| 7018 | YGR291C | C |        | 1442 | 1401 | 0 |
| 7019 | YGR293C | C |        | 315  | 265  | 0 |

|      |          |   |        |      |      |   |
|------|----------|---|--------|------|------|---|
| 7020 | YGR295C  | C | COS6   | 5388 | 3925 | 0 |
| 7021 | YHR035W  | W |        | 346  | 276  | 0 |
| 7022 | YHR037W  | W | PUT2   | 306  | 226  | 1 |
| 7023 | YHR039BC |   |        | 1378 | 1989 | 0 |
| 7024 | YHR040W  | W |        | 600  | 718  | 0 |
| 7025 | YHR042W  | W | NCP1   | 1466 | 1458 | 0 |
| 7026 | YHR044C  | C | DOG1   | 412  | 390  | 0 |
| 7027 | YHR129C  | C | ARP1   | 653  | 687  | 0 |
| 7028 | YHR131C  | C |        | 693  | 783  | 0 |
| 7029 | YHR133C  | C |        | 1639 | 1654 | 0 |
| 7030 | YHR135C  | C | YCK1   | 1315 | 1609 | 0 |
| 7031 | YHR137W  | W | AR09   | 1685 | 3071 | 0 |
| 7032 | YHR139C  | C | SPS100 | 417  | 373  | 0 |
| 7033 | YIL005W  | W | EPS1   | 963  | 1245 | 0 |
| 7034 | YIL007C  | C |        | 402  | 411  | 0 |
| 7035 | YIL009W  | W | FAA3   | 1006 | 1628 | 0 |
| 7036 | YIL011W  | W | TIR3   | 533  | 423  | 0 |
| 7037 | YIL013C  | C | PDR11  | 301  | 240  | 0 |
| 7038 | YIL015W  | W | BAR1   | 1483 | 2860 | 0 |
| 7039 | YIL102C  | C |        | 297  | 241  | 0 |
| 7040 | YIL104C  | C |        | 566  | 764  | 0 |
| 7041 | YIL106W  | W | MOB1   | 630  | 688  | 0 |
| 7042 | YIL108W  | W |        | 646  | 698  | 0 |
| 7043 | YIL110W  | W |        | 703  | 822  | 0 |
| 7044 | YIL112W  | W |        | 416  | 534  | 0 |
| 7045 | YIR021W  | W | MRS1   | 537  | 531  | 0 |
| 7046 | YIR023W  | W | DAL81  | 687  | 949  | 0 |
| 7047 | YIR025W  | W | MND2   | 529  | 474  | 0 |
| 7048 | YIR027C  | C | DAL1   | 415  | 365  | 0 |
| 7049 | YIR029W  | W | DAL2   | 411  | 364  | 0 |
| 7050 | YIR031C  | C | DAL7   | 608  | 510  | 0 |
| 7051 | YJL074C  | C | SMC3   | 536  | 611  | 0 |
| 7052 | YJL076W  | W | NET1   | 564  | 646  | 0 |
| 7053 | YJL078C  | C | PRY3   | 323  | 244  | 1 |
| 7054 | YJL080C  | C | SCP160 | 847  | 838  | 0 |
| 7055 | YJL082W  | W | IML2   | 424  | 370  | 0 |
| 7056 | YJL084C  | C |        | 463  | 497  | 0 |
| 7057 | YJL170C  | C | ASG7   | 397  | 450  | 0 |
| 7058 | YJL172W  | W | CPS1   | 1161 | 1849 | 0 |
| 7059 | YJL174W  | W | KRE9   | 1081 | 1455 | 0 |
| 7060 | YJL176C  | C | SWI3   | 757  | 975  | 0 |
| 7061 | YJL178C  | C |        | 775  | 1051 | 0 |
| 7062 | YJL180C  | C | ATP12  | 529  | 557  | 0 |
| 7063 | YJR041C  | C |        | 423  | 446  | 0 |
| 7064 | YJR043C  | C | POL32  | 568  | 708  | 0 |
| 7065 | YJR045C  | C | SSC1   | 2558 | 4505 | 0 |
| 7066 | YJR047C  | C | ANB1   | 2114 | 2613 | 0 |
| 7067 | YJR049C  | C | UTR1   | 613  | 845  | 0 |
| 7068 | YJR051W  | W | OSM1   | 661  | 866  | 0 |
| 7069 | YJR138W  | W | IML1   | 325  | 293  | 1 |
| 7070 | YJR140C  | C | HIR3   | 349  | 370  | 0 |
| 7071 | YJR142W  | W |        | 734  | 933  | 0 |

|      |         |   |        |      |      |   |
|------|---------|---|--------|------|------|---|
| 7072 | YJR144W | W | MGM101 | 885  | 1055 | 0 |
| 7073 | YJR146W | W |        | 486  | 401  | 0 |
| 7074 | YJR148W | W | BAT2   | 1592 | 3774 | 0 |
| 7075 | YKL071W | W |        | 642  | 459  | 0 |
| 7076 | YKL073W | W | LHS1   | 803  | 848  | 0 |
| 7077 | YKL075C | C |        | 603  | 708  | 0 |
| 7078 | YKL077W | W |        | 1599 | 2032 | 0 |
| 7079 | YKL079W | W | SMY1   | 693  | 823  | 0 |
| 7080 | YKL081W | W | TEF4   | 8036 | 5652 | 0 |
| 7081 | YKL166C | C | TPK3   | 315  | 261  | 1 |
| 7082 | YKL168C | C | KKQ8   | 492  | 519  | 0 |
| 7083 | YKL170W | W | MRPL38 | 475  | 542  | 0 |
| 7084 | YKL172W | W | EBP2   | 1458 | 2415 | 0 |
| 7085 | YKL174C | C |        | 460  | 497  | 0 |
| 7086 | YKL176C | C | LST4   | 614  | 677  | 0 |
| 7087 | YKR037C | C | SPC34  | 502  | 558  | 0 |
| 7088 | YKR039W | W | GAP1   | 464  | 522  | 0 |
| 7089 | YKR041W | W |        | 434  | 381  | 0 |
| 7090 | YKR043C | C |        | 1209 | 1242 | 2 |
| 7091 | YKR045C | C |        | 584  | 685  | 0 |
| 7092 | YKR047W | W |        | 848  | 1423 | 0 |
| 7093 | YLL027W | W | ISA1   | 632  | 802  | 0 |
| 7094 | YLL029W | W |        | 581  | 775  | 0 |
| 7095 | YLL031C | C | GPI13  | 510  | 441  | 0 |
| 7096 | YLL033W | W |        | 388  | 377  | 0 |
| 7097 | YLL035W | W | GRC3   | 452  | 501  | 0 |
| 7098 | YLL037W | W |        | 602  | 615  | 0 |
| 7099 | YLR056W | W | ERG3   | 1983 | 2543 | 0 |
| 7100 | YLR058C | C | SHM2   | 2765 | 5596 | 0 |
| 7101 | YLR060W | W | FRS1   | 2909 | 3380 | 0 |
| 7102 | YLR062C | C | BUD28  | 3736 | 4505 | 0 |
| 7103 | YLR064W | W |        | 1144 | 1356 | 0 |
| 7104 | YLR066W | W | SPC3   | 1126 | 1268 | 0 |
| 7105 | YLR152C | C |        | 472  | 438  | 0 |
| 7106 | YLR154C | C |        | 544  | 686  | 0 |
| 7107 | YLR156W | W |        | 406  | 391  | 0 |
| 7108 | YLR158C | C | ASP3-3 | 1449 | 1834 | 0 |
| 7109 | YLR160C | C | ASP3-4 | 1147 | 1385 | 0 |
| 7110 | YLR162W | W |        | 400  | 375  | 0 |
| 7111 | YLR248W | W | RCK2   | 1168 | 1577 | 0 |
| 7112 | YLR250W | W | SSP120 | 947  | 1598 | 0 |
| 7113 | YLR252W | W |        | 396  | 459  | 0 |
| 7114 | YLR254C | C |        | 452  | 511  | 0 |
| 7115 | YLR256W | W | HAP1   | 600  | 776  | 0 |
| 7116 | YLR258W | W | GSY2   | 989  | 1348 | 0 |
| 7117 | YLR344W | W | RPL26A | 1654 | 1827 | 0 |
| 7118 | YLR346C | C |        | 364  | 283  | 0 |
| 7119 | YLR348C | C | DIC1   | 565  | 822  | 0 |
| 7120 | YLR350W | W |        | 1214 | 1201 | 0 |
| 7121 | YLR352W | W |        | 532  | 561  | 0 |
| 7122 | YLR354C | C | TAL1   | 2714 | 4063 | 0 |
| 7123 | YLR440C | C |        | 526  | 612  | 0 |

|      |         |   |       |      |      |   |
|------|---------|---|-------|------|------|---|
| 7124 | YLR442C | C | SIR3  | 330  | 310  | 1 |
| 7125 | YLR444C | C |       | 572  | 510  | 0 |
| 7126 | YLR446W | W |       | 579  | 492  | 0 |
| 7127 | YLR448W | W | RPL6B | 5090 | 5670 | 0 |
| 7128 | YLR450W | W | HMG2  | 383  | 322  | 1 |
| 7129 | YML081W | W |       | 583  | 737  | 0 |
| 7130 | YML083C | C |       | 355  | 303  | 0 |
| 7131 | YML087C | C |       | 293  | 261  | 1 |
| 7132 | YML089C | C |       | 318  | 266  | 0 |
| 7133 | YML091C | C | RPM2  | 353  | 300  | 0 |
| 7134 | YML093W | W |       | 646  | 1138 | 0 |
| 7135 | YMR053C | C | STB2  | 396  | 381  | 0 |
| 7136 | YMR055C | C | BUB2  | 604  | 593  | 0 |
| 7137 | YMR057C | C |       | 328  | 278  | 0 |
| 7138 | YMR059W | W | SEN15 | 434  | 447  | 0 |
| 7139 | YMR063W | W | RIM9  | 426  | 393  | 0 |
| 7140 | YMR065W | W | KAR5  | 410  | 466  | 0 |
| 7141 | YMR159C | C | APG16 | 433  | 371  | 0 |
| 7142 | YMR161W | W | HLJ1  | 775  | 809  | 0 |
| 7143 | YMR163C | C |       | 519  | 473  | 0 |
| 7144 | YMR165C | C | SMP2  | 300  | 248  | 1 |
| 7145 | YMR168C | C | CEP3  | 436  | 481  | 0 |
| 7146 | YMR171C | C |       | 880  | 947  | 0 |
| 7147 | YMR267W | W | PPA2  | 740  | 866  | 0 |
| 7148 | YMR269W | W |       | 690  | 995  | 0 |
| 7149 | YMR271C | C | URA10 | 430  | 441  | 0 |
| 7150 | YMR274C | C | RCE1  | 581  | 455  | 0 |
| 7151 | YMR276W | W | DSK2  | 337  | 356  | 0 |
| 7152 | YMR278W | W |       | 917  | 1000 | 0 |
| 7153 | YNL041C | C | TFI2  | 667  | 895  | 0 |
| 7154 | YNL043C | C |       | 676  | 674  | 0 |
| 7155 | YNL045W | W |       | 1353 | 2045 | 0 |
| 7156 | YNL047C | C |       | 593  | 726  | 0 |
| 7157 | YNL049C | C | SFB2  | 700  | 833  | 0 |
| 7158 | YNL051W | W |       | 529  | 626  | 0 |
| 7159 | YNL137C | C | NAM9  | 670  | 885  | 0 |
| 7160 | YNL139C | C | RLR1  | 346  | 374  | 0 |
| 7161 | YNL141W | W | AAH1  | 1106 | 1628 | 0 |
| 7162 | YNL143C | C |       | 361  | 324  | 0 |
| 7163 | YNL145W | W | MFA2  | 1044 | 1542 | 0 |
| 7164 | YNL147W | W | LSM7  | 689  | 856  | 0 |
| 7165 | YNL233W | W | BNI4  | 510  | 650  | 0 |
| 7166 | YNL235C | C |       | 622  | 721  | 0 |
| 7167 | YNL237W | W | YTP1  | 402  | 447  | 0 |
| 7168 | YNL239W | W | LAP3  | 1072 | 1620 | 0 |
| 7169 | YNL241C | C | ZWF1  | 1708 | 2405 | 0 |
| 7170 | YNL243W | W | SLA2  | 704  | 1029 | 1 |
| 7171 | YNL329C | C | PEX6  | 500  | 539  | 0 |
| 7172 | YNL331C | C | AAD14 | 642  | 733  | 0 |
| 7173 | YNL333W | W | SNZ2  | 545  | 524  | 0 |
| 7174 | YNL335W | W |       | 440  | 379  | 0 |
| 7175 | YNL337W | W |       | 489  | 390  | 0 |

|      |         |   |        |      |      |   |
|------|---------|---|--------|------|------|---|
| 7176 | YNL339C | C | YRF1-6 | 371  | 329  | 0 |
| 7177 | YOL009C | C | MDM12  | 593  | 549  | 0 |
| 7178 | YOL011W | W | PLB3   | 555  | 658  | 0 |
| 7179 | YOL013C | C | HRD1   | 419  | 466  | 0 |
| 7180 | YOL015W | W |        | 298  | 247  | 0 |
| 7181 | YOL017W | W |        | 335  | 344  | 0 |
| 7182 | YOL019W | W | TOS7   | 490  | 656  | 0 |
| 7183 | YOL104C | C | NDJ1   | 455  | 543  | 0 |
| 7184 | YOL106W | W |        | 948  | 1315 | 0 |
| 7185 | YOL108C | C | INO4   | 431  | 497  | 0 |
| 7186 | YOL110W | W | SHR5   | 324  | 313  | 0 |
| 7187 | YOL112W | W | MSB4   | 476  | 574  | 0 |
| 7188 | YOL114C | C |        | 426  | 350  | 0 |
| 7189 | YOR034C | C | AKR2   | 571  | 604  | 0 |
| 7190 | YOR036W | W | PEP12  | 511  | 552  | 0 |
| 7191 | YOR038C | C | HIR2   | 512  | 604  | 0 |
| 7192 | YOR040W | W | GLO4   | 474  | 588  | 0 |
| 7193 | YOR042W | W |        | 960  | 1670 | 0 |
| 7194 | YOR044W | W |        | 418  | 398  | 0 |
| 7195 | YOR130C | C | ORT1   | 552  | 582  | 0 |
| 7196 | YOR132W | W | VPS17  | 1089 | 1236 | 0 |
| 7197 | YOR134W | W | BAG7   | 391  | 354  | 0 |
| 7198 | YOR136W | W | IDH2   | 1622 | 3648 | 0 |
| 7199 | YOR138C | C |        | 641  | 754  | 0 |
| 7200 | YOR140W | W | SFL1   | 688  | 800  | 0 |
| 7201 | YOR226C | C | ISU2   | 658  | 685  | 0 |
| 7202 | YOR228C | C |        | 226  | 164  | 0 |
| 7203 | YOR230W | W | WTM1   | 2360 | 2798 | 0 |
| 7204 | YOR232W | W | MGE1   | 1278 | 1995 | 0 |
| 7205 | YOR234C | C | RPL33B | 1201 | 1615 | 0 |
| 7206 | YOR236W | W | DFR1   | 631  | 745  | 0 |
| 7207 | YOR322C | C |        | 611  | 814  | 0 |
| 7208 | YOR324C | C |        | 548  | 635  | 0 |
| 7209 | YOR326W | W | MYO2   | 443  | 580  | 0 |
| 7210 | YOR328W | W | PDR10  | 344  | 446  | 0 |
| 7211 | YOR330C | C | MIP1   | 432  | 557  | 0 |
| 7212 | YOR332W | W | VMA4   | 2089 | 3641 | 0 |
| 7213 | YPL024W | W | NCE4   | 408  | 534  | 0 |
| 7214 | YPL026C | C | SKS1   | 435  | 533  | 0 |
| 7215 | YPL028W | W | ERG10  | 761  | 1127 | 0 |
| 7216 | YPL030W | W |        | 304  | 283  | 1 |
| 7217 | YPL032C | C | SVL3   | 383  | 285  | 1 |
| 7218 | YPL034W | W |        | 437  | 564  | 0 |
| 7219 | YPL120W | W | VPS30  | 420  | 536  | 0 |
| 7220 | YPL122C | C | TFB2   | 555  | 725  | 0 |
| 7221 | YPL124W | W | NIP29  | 457  | 466  | 0 |
| 7222 | YPL126W | W | NAN1   | 492  | 666  | 0 |
| 7223 | YPL128C | C | TBF1   | 602  | 647  | 0 |
| 7224 | YPL130W | W | SP019  | 338  | 271  | 0 |
| 7225 | YPL216W | W |        | 394  | 368  | 0 |
| 7226 | YPL218W | W | SAR1   | 1093 | 1390 | 0 |
| 7227 | YPL220W | W | RPL1A  | 5740 | 4804 | 0 |

|      |             |   |        |      |      |   |
|------|-------------|---|--------|------|------|---|
| 7228 | YPL222W     | W |        | 379  | 315  | 1 |
| 7229 | YPL224C     | C | MMT2   | 576  | 533  | 0 |
| 7230 | YPL226W     | W | NEW1   | 947  | 914  | 0 |
| 7231 | YPR029C     | C | APL4   | 554  | 673  | 0 |
| 7232 | YPR031W     | W |        | 414  | 509  | 0 |
| 7233 | YPR033C     | C | HTS1   | 1458 | 1928 | 0 |
| 7234 | YPR035W     | W | GLN1   | 1650 | 2881 | 0 |
| 7235 | YPR037C     | C | ERV2   | 648  | 754  | 0 |
| 7236 | YPR039W     | W |        | 399  | 409  | 0 |
| 7237 | YPR125W     | W |        | 586  | 1099 | 0 |
| 7238 | YPR127W     | W |        | 503  | 891  | 0 |
| 7239 | YPR129W     | W | SCD6   | 626  | 990  | 0 |
| 7240 | YPR131C     | C | NAT3   | 567  | 750  | 0 |
| 7241 | YPR133C     | C | IWS1   | 835  | 1371 | 0 |
| 7242 | YPR135W     | W | CTF4   | 298  | 258  | 1 |
| 7243 | EMPTY       |   |        | 339  | 321  | 0 |
| 7244 | EMPTY       |   |        | 327  | 270  | 0 |
| 7245 | EMPTY       |   |        | 341  | 292  | 0 |
| 7246 | EMPTY       |   |        | 336  | 305  | 0 |
| 7247 | EMPTY       |   |        | 301  | 273  | 0 |
| 7248 | EMPTY       |   |        | 286  | 262  | 0 |
| 7249 | NORF 74     |   |        | 666  | 1113 | 0 |
| 7250 | NORF 78     |   |        | 661  | 967  | 0 |
| 7251 | NORF 82     |   |        | 352  | 299  | 0 |
| 7252 | NORF 86     |   |        | 358  | 332  | 0 |
| 7253 | NORF 90     |   |        | 614  | 801  | 0 |
| 7254 | NORF 94     |   |        | 613  | 585  | 0 |
| 7255 | YDR296W     | W | MHR1   | 546  | 618  | 2 |
| 7256 | YDR359C     | C | VID21  | 502  | 676  | 2 |
| 7257 | YDR420W     | W | HKR1   | 318  | 287  | 1 |
| 7258 | YDR464W     | W | SPP41  | 400  | 544  | 1 |
| 7259 | YDR509W     | W |        | 944  | 1115 | 0 |
| 7260 | YEL031W     | W | SPF1   | 1625 | 2397 | 2 |
| 7261 | YJL136C     | C | RPS21B | 1765 | 2055 | 0 |
| 7262 | YJL207C     | C |        | 332  | 351  | 1 |
| 7263 | YJR002W     | W | MPP10  | 1432 | 2053 | 0 |
| 7264 | YJR090C     | C | GRR1   | 585  | 781  | 0 |
| 7265 | YJR120W     | W |        | 850  | 769  | 0 |
| 7266 | YJR160C     | C |        | 596  | 533  | 2 |
| 7267 | YOR058C     | C | ASE1   | 1091 | 1140 | 0 |
| 7268 | YOR062C     | C |        | 522  | 645  | 0 |
| 7269 | YOR110W     | W | TFC7   | 973  | 1160 | 0 |
| 7270 | YOR124C     | C | UBP2   | 467  | 757  | 0 |
| 7271 | YOR173W     | W |        | 600  | 1123 | 0 |
| 7272 | YOR211C     | C | MGM1   | 363  | 369  | 0 |
| 7273 | EMPTY       |   |        | 361  | 323  | 0 |
| 7274 | EMPTY       |   |        | 320  | 271  | 0 |
| 7275 | EMPTY       |   |        | 319  | 284  | 0 |
| 7276 | EMPTY       |   |        | 421  | 537  | 0 |
| 7277 | EMPTY       |   |        | 338  | 290  | 0 |
| 7278 | EMPTY       |   |        | 306  | 258  | 0 |
| 7279 | YBR286W-150 |   |        | 2275 | 3944 | 0 |

|      |              |   |       |      |      |   |
|------|--------------|---|-------|------|------|---|
| 7280 | YBR286W-250  |   | 2381  | 4101 | 0    |   |
| 7281 | YBR286W-350  |   | 2515  | 4024 | 0    |   |
| 7282 | YBR286W-450  |   | 1750  | 2717 | 0    |   |
| 7283 | YBR286W-550  |   | 1099  | 1755 | 0    |   |
| 7284 | YBR286W-650  |   | 1380  | 2516 | 0    |   |
| 7285 | EMPTY        |   | 312   | 309  | 0    |   |
| 7286 | EMPTY        |   | 315   | 283  | 0    |   |
| 7287 | EMPTY        |   | 306   | 290  | 0    |   |
| 7288 | EMPTY        |   | 309   | 287  | 0    |   |
| 7289 | EMPTY        |   | 319   | 286  | 0    |   |
| 7290 | EMPTY        |   | 312   | 267  | 0    |   |
| 7291 | YMR219W      | W | ESC1  | 322  | 334  | 0 |
| 7292 | YMR247C      | C |       | 388  | 360  | 0 |
| 7293 | YMR284W      | W | YKU70 | 461  | 540  | 0 |
| 7294 | YNL008C      | C | ASI3  | 503  | 573  | 0 |
| 7295 | YNL102W      | W | POL1  | 377  | 397  | 0 |
| 7296 | YOL004W      | W | SIN3  | 748  | 965  | 0 |
| 7297 | YBR286W-1200 |   |       | 403  | 315  | 1 |
| 7298 | YBR286W-1300 |   |       | 363  | 311  | 1 |
| 7299 | YBR286W-1400 |   |       | 321  | 275  | 1 |
| 7300 | YBR286W-1500 |   |       | 367  | 340  | 1 |
| 7301 | YBR286W-1600 |   |       | 337  | 296  | 1 |
| 7302 | EMPTY        |   |       | 305  | 273  | 0 |
| 7303 | YOR340C      | C | RPA43 | 1134 | 1593 | 0 |
| 7304 | YOR342C      | C |       | 928  | 1273 | 0 |
| 7305 | YOR351C      | C | MEK1  | 366  | 318  | 0 |
| 7306 | YOR356W      | W |       | 308  | 274  | 1 |
| 7307 | YOR360C      | C | PDE2  | 1008 | 1392 | 0 |
| 7308 | YOR363C      | C | PIP2  | 409  | 430  | 0 |
| 7309 | EMPTY        |   |       | 301  | 283  | 0 |
| 7310 | EMPTY        |   |       | 297  | 275  | 0 |
| 7311 | EMPTY        |   |       | 308  | 288  | 0 |
| 7312 | EMPTY        |   |       | 359  | 299  | 0 |
| 7313 | EMPTY        |   |       | 387  | 324  | 0 |
| 7314 | EMPTY        |   |       | 363  | 327  | 0 |
| 7315 | EMPTY        |   |       | 403  | 319  | 0 |
| 7316 | EMPTY        |   |       | 465  | 319  | 0 |
| 7317 | EMPTY        |   |       | 353  | 319  | 0 |
| 7318 | EMPTY        |   |       | 356  | 308  | 0 |
| 7319 | EMPTY        |   |       | 342  | 319  | 0 |
| 7320 | EMPTY        |   |       | 346  | 327  | 0 |
| 7321 | YHR151C      | C |       | 355  | 327  | 1 |
| 7322 | YHR164C      | C | DNA2  | 327  | 302  | 1 |
| 7323 | YIL091C      | C |       | 590  | 1019 | 0 |
| 7324 | YIL100W      | W |       | 317  | 283  | 1 |
| 7325 | YJL010C      | C |       | 456  | 639  | 0 |
| 7326 | YJL027C      | C |       | 317  | 290  | 0 |
| 7327 | EMPTY        |   |       | 325  | 295  | 0 |
| 7328 | EMPTY        |   |       | 323  | 308  | 0 |
| 7329 | EMPTY        |   |       | 320  | 300  | 0 |
| 7330 | EMPTY        |   |       | 318  | 314  | 0 |
| 7331 | EMPTY        |   |       | 346  | 319  | 0 |

|            |     |     |   |
|------------|-----|-----|---|
| 7332 EMPTY | 348 | 310 | 0 |
| 7333 EMPTY | 350 | 326 | 0 |
| 7334 EMPTY | 331 | 320 | 0 |
| 7335 EMPTY | 369 | 323 | 0 |
| 7336 EMPTY | 463 | 338 | 0 |
| 7337 EMPTY | 385 | 309 | 0 |
| 7338 EMPTY | 357 | 334 | 0 |
| 7339 EMPTY | 387 | 341 | 0 |
| 7340 EMPTY | 499 | 343 | 0 |
| 7341 EMPTY | 416 | 364 | 0 |
| 7342 EMPTY | 375 | 351 | 0 |
| 7343 EMPTY | 380 | 360 | 0 |
| 7344 EMPTY | 386 | 374 | 0 |
| 7345 3XSSC | 371 | 348 | 0 |
| 7346 3XSSC | 342 | 317 | 0 |
| 7347 3XSSC | 329 | 312 | 0 |
| 7348 3XSSC | 331 | 291 | 0 |
| 7349 3XSSC | 332 | 312 | 0 |
| 7350 3XSSC | 328 | 310 | 0 |
| 7351 EMPTY | 336 | 322 | 0 |
| 7352 EMPTY | 330 | 330 | 0 |
| 7353 EMPTY | 339 | 329 | 0 |
| 7354 EMPTY | 335 | 327 | 0 |
| 7355 EMPTY | 344 | 343 | 0 |
| 7356 EMPTY | 362 | 341 | 0 |
| 7357 EMPTY | 363 | 336 | 0 |
| 7358 EMPTY | 360 | 346 | 0 |
| 7359 EMPTY | 360 | 355 | 0 |
| 7360 EMPTY | 391 | 377 | 0 |
| 7361 EMPTY | 393 | 398 | 0 |
| 7362 EMPTY | 396 | 394 | 0 |
| 7363 EMPTY | 449 | 413 | 0 |
| 7364 EMPTY | 456 | 394 | 0 |
| 7365 EMPTY | 422 | 406 | 0 |
| 7366 EMPTY | 415 | 400 | 0 |
| 7367 EMPTY | 413 | 413 | 0 |
| 7368 EMPTY | 431 | 421 | 0 |
| 7369 3XSSC | 446 | 445 | 0 |
| 7370 3XSSC | 407 | 356 | 0 |
| 7371 3XSSC | 372 | 344 | 0 |
| 7372 3XSSC | 340 | 320 | 0 |
| 7373 3XSSC | 348 | 339 | 0 |
| 7374 3XSSC | 331 | 333 | 0 |
| 7375 EMPTY | 345 | 342 | 0 |
| 7376 EMPTY | 354 | 362 | 0 |
| 7377 EMPTY | 344 | 353 | 0 |
| 7378 EMPTY | 347 | 351 | 0 |
| 7379 EMPTY | 362 | 376 | 0 |
| 7380 EMPTY | 367 | 370 | 0 |
| 7381 EMPTY | 379 | 376 | 0 |
| 7382 EMPTY | 373 | 370 | 0 |
| 7383 EMPTY | 390 | 396 | 0 |

|      |         |   |           |      |      |   |
|------|---------|---|-----------|------|------|---|
| 7384 | EMPTY   |   | 405       | 420  | 0    |   |
| 7385 | EMPTY   |   | 452       | 437  | 0    |   |
| 7386 | EMPTY   |   | 434       | 444  | 0    |   |
| 7387 | EMPTY   |   | 445       | 445  | 0    |   |
| 7388 | EMPTY   |   | 458       | 462  | 0    |   |
| 7389 | EMPTY   |   | 456       | 467  | 0    |   |
| 7390 | EMPTY   |   | 467       | 476  | 0    |   |
| 7391 | EMPTY   |   | 480       | 489  | 0    |   |
| 7392 | EMPTY   |   | 466       | 474  | 0    |   |
| 7393 | YBR232C | C | 396       | 373  | 0    |   |
| 7394 | YBR234C | C | ARC40     | 895  | 1163 | 0 |
| 7395 | YBR236C | C | ABD1      | 708  | 899  | 0 |
| 7396 | YBR238C | C |           | 498  | 417  | 0 |
| 7397 | YBR240C | C | THI2      | 312  | 241  | 0 |
| 7398 | YBR242W | W |           | 718  | 764  | 0 |
| 7399 | YCL027W | W | FUS1      | 725  | 1057 | 0 |
| 7400 | YCL029C | C | BIK1      | 396  | 325  | 1 |
| 7401 | YCL031C | C | RRP7      | 1216 | 1390 | 0 |
| 7402 | YCL033C | C |           | 612  | 804  | 0 |
| 7403 | YCL035C | C | GRX1      | 958  | 2295 | 0 |
| 7404 | YCL037C | C | SR09      | 1924 | 2246 | 0 |
| 7405 | YCR035C | C | RRP43     | 825  | 904  | 0 |
| 7406 | YCR037C | C | PH087     | 2056 | 1585 | 0 |
| 7407 | YCR039C | C | MATALPHA2 | 781  | 929  | 0 |
| 7408 | YCR041W | W |           | 577  | 549  | 0 |
| 7409 | YCR043C | C |           | 942  | 796  | 0 |
| 7410 | YCR045C | C |           | 254  | 177  | 1 |
| 7411 | YDL003W | W | MCD1      | 725  | 959  | 0 |
| 7412 | YDL005C | C | MED2      | 756  | 869  | 0 |
| 7413 | YDL007W | W | RPT2      | 1391 | 2183 | 0 |
| 7414 | YDL009C | C |           | 672  | 698  | 0 |
| 7415 | YDL011C | C |           | 552  | 436  | 0 |
| 7416 | YDL013W | W | HEX3      | 687  | 713  | 0 |
| 7417 | YDL099W | W |           | 565  | 783  | 0 |
| 7418 | YDL101C | C | DUN1      | 360  | 326  | 0 |
| 7419 | YDL103C | C | QRI1      | 413  | 502  | 0 |
| 7420 | YDL105W | W | QRI2      | 326  | 269  | 0 |
| 7421 | YDL107W | W | MSS2      | 2155 | 1341 | 0 |
| 7422 | YDL109C | C |           | 264  | 206  | 0 |
| 7423 | YDL195W | W | SEC31     | 1813 | 1664 | 0 |
| 7424 | YDL197C | C | ASF2      | 663  | 624  | 2 |
| 7425 | YDL199C | C |           | 430  | 337  | 0 |
| 7426 | YDL201W | W |           | 1046 | 1257 | 0 |
| 7427 | YDL203C | C |           | 788  | 832  | 0 |
| 7428 | YDL205C | C | HEM3      | 663  | 493  | 0 |
| 7429 | YDR043C | C | NRG1      | 413  | 329  | 0 |
| 7430 | YDR045C | C | RPC11     | 507  | 506  | 0 |
| 7431 | YDR047W | W | HEM12     | 598  | 667  | 0 |
| 7432 | YDR049W | W |           | 366  | 398  | 0 |
| 7433 | YDR051C | C |           | 490  | 528  | 0 |
| 7434 | YDR053W | W |           | 435  | 426  | 0 |
| 7435 | YDR139C | C | RUB1      | 671  | 698  | 0 |

|      |         |   |        |      |      |   |
|------|---------|---|--------|------|------|---|
| 7436 | YDR141C | C | DOP1   | 415  | 403  | 0 |
| 7437 | YDR143C | C | SAN1   | 945  | 904  | 0 |
| 7438 | YDR145W | W | TAF61  | 1170 | 1553 | 0 |
| 7439 | YDR147W | W | EKI1   | 490  | 448  | 0 |
| 7440 | YDR149C | C |        | 264  | 174  | 0 |
| 7441 | YDR249C | C |        | 410  | 356  | 0 |
| 7442 | YDR251W | W | PAM1   | 1025 | 1011 | 0 |
| 7443 | YDR253C | C | MET32  | 434  | 354  | 0 |
| 7444 | YDR255C | C |        | 462  | 435  | 0 |
| 7445 | YDR257C | C | RMS1   | 2884 | 1865 | 0 |
| 7446 | YDR259C | C | YAP6   | 462  | 475  | 0 |
| 7447 | YDR331W | W | GPI8   | 1118 | 1077 | 0 |
| 7448 | YDR333C | C |        | 824  | 829  | 0 |
| 7449 | YDR335W | W | MSN5   | 766  | 914  | 0 |
| 7450 | YDR337W | W | MRPS28 | 720  | 777  | 0 |
| 7451 | YDR339C | C |        | 887  | 1085 | 0 |
| 7452 | YDR341C | C |        | 3269 | 2989 | 0 |
| 7453 | YDR427W | W | RPN9   | 1421 | 1877 | 0 |
| 7454 | YDR429C | C | TIF35  | 2196 | 2848 | 0 |
| 7455 | YDR431W | W |        | 421  | 341  | 0 |
| 7456 | YDR433W | W | KRE22  | 1113 | 1358 | 0 |
| 7457 | YDR435C | C | PPM1   | 573  | 486  | 0 |
| 7458 | YDR437W | W |        | 399  | 296  | 0 |
| 7459 | YDR523C | C | SPS1   | 370  | 243  | 0 |
| 7460 | YDR525W | W |        | 344  | 239  | 0 |
| 7461 | YDR527W | W |        | 756  | 1047 | 0 |
| 7462 | YDR529C | C | QCR7   | 1265 | 1266 | 0 |
| 7463 | YDR531W | W |        | 910  | 944  | 0 |
| 7464 | YDR533C | C |        | 655  | 1047 | 0 |
| 7465 | YAR015W | W | ADE1   | 392  | 435  | 2 |
| 7466 | YAR019C | C | CDC15  | 282  | 202  | 1 |
| 7467 | YAR023C | C |        | 320  | 242  | 0 |
| 7468 | YAR028W | W |        | 345  | 288  | 0 |
| 7469 | YAR030C | C |        | 316  | 242  | 0 |
| 7470 | YAR033W | W |        | 404  | 373  | 0 |
| 7471 | YBL064C | C |        | 954  | 1422 | 0 |
| 7472 | YBL066C | C | SEF1   | 371  | 255  | 1 |
| 7473 | YBL068W | W | PRS4   | 898  | 1013 | 0 |
| 7474 | YBL070C | C |        | 373  | 370  | 0 |
| 7475 | YBL072C | C | RPS8A  | 7240 | 7823 | 0 |
| 7476 | YBL074C | C | AAR2   | 505  | 418  | 0 |
| 7477 | YBR043C | C |        | 369  | 343  | 0 |
| 7478 | YBR045C | C | GIP1   | 267  | 194  | 0 |
| 7479 | YBR047W | W |        | 323  | 295  | 0 |
| 7480 | YBR049C | C | REB1   | 668  | 769  | 0 |
| 7481 | YBR051W | W |        | 331  | 226  | 0 |
| 7482 | YBR053C | C |        | 657  | 998  | 0 |
| 7483 | YBR137W | W |        | 499  | 752  | 0 |
| 7484 | YBR139W | W |        | 996  | 1382 | 0 |
| 7485 | YBR141C | C |        | 475  | 544  | 0 |
| 7486 | YBR143C | C | SUP45  | 1770 | 2148 | 0 |
| 7487 | YBR145W | W | ADH5   | 659  | 673  | 0 |

|      |         |   |        |      |      |   |
|------|---------|---|--------|------|------|---|
| 7488 | YBR147W | W |        | 319  | 239  | 0 |
| 7489 | YEL073C | C |        | 359  | 281  | 0 |
| 7490 | YEL075C | C |        | 931  | 821  | 0 |
| 7491 | YEL077C | C |        | 459  | 478  | 0 |
| 7492 | YER002W | W | NOP16  | 284  | 220  | 1 |
| 7493 | YER004W | W |        | 991  | 1311 | 0 |
| 7494 | YER006W | W | NUG1   | 1232 | 1505 | 0 |
| 7495 | YER088C | C | DOT6   | 2389 | 1628 | 0 |
| 7496 | YER090W | W | TRP2   | 1832 | 2142 | 0 |
| 7497 | YER092W | W | IES5   | 638  | 754  | 0 |
| 7498 | YER094C | C | PUP3   | 1139 | 1350 | 0 |
| 7499 | YER096W | W | SHC1   | 462  | 519  | 0 |
| 7500 | YER098W | W | UBP9   | 489  | 438  | 0 |
| 7501 | YER184C | C |        | 429  | 348  | 0 |
| 7502 | YER186C | C |        | 620  | 593  | 0 |
| 7503 | YER188W | W |        | 390  | 277  | 0 |
| 7504 | YER190W | W | YRF1-2 | 1106 | 1418 | 0 |
| 7505 | YFL-TYB |   |        | 4128 | 7420 | 0 |
| 7506 | YFL002C | C | SPB4   | 971  | 1081 | 0 |
| 7507 | YFR019W | W | FAB1   | 304  | 235  | 1 |
| 7508 | YFR021W | W | NMR1   | 630  | 614  | 0 |
| 7509 | YFR023W | W | PES4   | 360  | 246  | 0 |
| 7510 | YFR025C | C | HIS2   | 680  | 763  | 0 |
| 7511 | YFR027W | W | ECO1   | 431  | 367  | 0 |
| 7512 | YFR029W | W | PTR3   | 580  | 584  | 0 |
| 7513 | YGL057C | C |        | 554  | 513  | 0 |
| 7514 | YGL059W | W |        | 428  | 387  | 0 |
| 7515 | YGL061C | C | DUO1   | 425  | 458  | 0 |
| 7516 | YGL063W | W | PUS2   | 468  | 392  | 0 |
| 7517 | YGL065C | C | ALG2   | 867  | 835  | 0 |
| 7518 | YGL067W | W | NPY1   | 826  | 821  | 0 |
| 7519 | YGL153W | W | PEX14  | 796  | 978  | 0 |
| 7520 | YGL155W | W | CDC43  | 637  | 654  | 0 |
| 7521 | YGL157W | W |        | 1200 | 2109 | 0 |
| 7522 | YGL159W | W |        | 578  | 552  | 0 |
| 7523 | YGL161C | C |        | 925  | 904  | 0 |
| 7524 | YGL163C | C | RAD54  | 594  | 604  | 0 |
| 7525 | YGL249W | W | ZIP2   | 380  | 291  | 0 |
| 7526 | YGL251C | C | HFM1   | 363  | 312  | 0 |
| 7527 | YGL253W | W | HXK2   | 6165 | 3387 | 0 |
| 7528 | YGL255W | W | ZRT1   | 648  | 430  | 0 |
| 7529 | YGL257C | C | MNT2   | 495  | 514  | 0 |
| 7530 | YGL259W | W | YPS5   | 347  | 270  | 0 |
| 7531 | YGR082W | W | TOM20  | 1275 | 1354 | 0 |
| 7532 | YGR084C | C | MRP13  | 577  | 634  | 0 |
| 7533 | YGR086C | C |        | 4482 | 6250 | 0 |
| 7534 | YGR088W | W | CTT1   | 613  | 1078 | 0 |
| 7535 | YGR090W | W |        | 645  | 760  | 0 |
| 7536 | YGR092W | W | DBF2   | 632  | 696  | 0 |
| 7537 | YGR178C | C | PBP1   | 1502 | 1986 | 0 |
| 7538 | YGR180C | C | RNR4   | 3292 | 2456 | 0 |
| 7539 | YGR182C | C |        | 887  | 902  | 0 |

|      |         |   |        |      |      |   |
|------|---------|---|--------|------|------|---|
| 7540 | YGR184C | C | UBR1   | 303  | 226  | 1 |
| 7541 | YGR186W | W | TFG1   | 1190 | 1677 | 0 |
| 7542 | YGR188C | C | BUB1   | 313  | 285  | 0 |
| 7543 | YGR274C | C | TAF145 | 508  | 666  | 0 |
| 7544 | YGR276C | C | RNH70  | 851  | 1105 | 0 |
| 7545 | YGR278W | W |        | 395  | 368  | 0 |
| 7546 | YGR280C | C |        | 1315 | 1950 | 0 |
| 7547 | YGR282C | C | BGL2   | 2628 | 3204 | 0 |
| 7548 | YGR284C | C | ERV29  | 1195 | 1491 | 0 |
| 7549 | YHR024C | C | MAS2   | 929  | 1116 | 0 |
| 7550 | YHR026W | W | PPA1   | 2205 | 2180 | 0 |
| 7551 | YHR028C | C | DAP2   | 1127 | 1552 | 0 |
| 7552 | YHR030C | C | SLT2   | 886  | 1207 | 0 |
| 7553 | YHR032W | W |        | 955  | 880  | 0 |
| 7554 | YHR034C | C |        | 491  | 492  | 0 |
| 7555 | YHR118C | C | ORC6   | 641  | 720  | 0 |
| 7556 | YHR120W | W | MSH1   | 333  | 331  | 0 |
| 7557 | YHR122W | W |        | 578  | 649  | 0 |
| 7558 | YHR124W | W | NDT80  | 367  | 309  | 0 |
| 7559 | YHR126C | C |        | 315  | 231  | 0 |
| 7560 | YHR128W | W | FUR1   | 1692 | 1797 | 0 |
| 7561 | YHR213W | W |        | 554  | 559  | 0 |
| 7562 | YHR215W | W | PHO12  | 1396 | 2357 | 0 |
| 7563 | YHR217C | C |        | 1266 | 1093 | 0 |
| 7564 | YHR219W | W |        | 2827 | 3996 | 0 |
| 7565 | YIL002C | C | INP51  | 508  | 623  | 0 |
| 7566 | YIL004C | C | BET1   | 642  | 692  | 0 |
| 7567 | YIL091C | C |        | 271  | 212  | 1 |
| 7568 | YIL093C | C | RSM25  | 281  | 211  | 1 |
| 7569 | YIL095W | W | PRK1   | 381  | 393  | 0 |
| 7570 | YIL097W | W | FYV10  | 403  | 384  | 0 |
| 7571 | YIL099W | W | SGA1   | 333  | 283  | 0 |
| 7572 | YIL101C | C | XBP1   | 408  | 337  | 0 |
| 7573 | YIR010W | W |        | 725  | 741  | 0 |
| 7574 | YIR012W | W | SQT1   | 1477 | 1707 | 0 |
| 7575 | YIR014W | W |        | 430  | 332  | 0 |
| 7576 | YIR016W | W |        | 567  | 529  | 0 |
| 7577 | YIR018W | W | YAP5   | 439  | 388  | 0 |
| 7578 | YIR020C | C |        | 356  | 257  | 0 |
| 7579 | YJL063C | C | MRPL8  | 734  | 792  | 0 |
| 7580 | YJL065C | C |        | 591  | 664  | 0 |
| 7581 | YJL067W | W |        | 698  | 833  | 0 |
| 7582 | YJL069C | C |        | 724  | 983  | 0 |
| 7583 | YJL071W | W | ARG2   | 512  | 512  | 0 |
| 7584 | YJL073W | W | JEM1   | 734  | 833  | 2 |
| 7585 | YJL159W | W | HSP150 | 2496 | 4632 | 0 |
| 7586 | YJL161W | W |        | 329  | 336  | 0 |
| 7587 | YJL163C | C |        | 440  | 381  | 0 |
| 7588 | YJL165C | C | HAL5   | 572  | 647  | 0 |
| 7589 | YJL167W | W | ERG20  | 779  | 1217 | 0 |
| 7590 | YJL169W | W |        | 581  | 637  | 0 |
| 7591 | YJR030C | C |        | 607  | 696  | 0 |

|      |         |   |        |      |       |   |
|------|---------|---|--------|------|-------|---|
| 7592 | YJR032W | W | CPR7   | 709  | 859   | 0 |
| 7593 | YJR034W | W | PET191 | 412  | 439   | 0 |
| 7594 | YJR036C | C | HUL4   | 367  | 325   | 0 |
| 7595 | YJR038C | C |        | 369  | 249   | 0 |
| 7596 | YJR040W | W | GEF1   | 913  | 863   | 0 |
| 7597 | YJR127C | C | ZMS1   | 662  | 545   | 2 |
| 7598 | YJR129C | C |        | 549  | 497   | 0 |
| 7599 | YJR131W | W | MNS1   | 713  | 699   | 0 |
| 7600 | YJR133W | W | XPT1   | 696  | 724   | 0 |
| 7601 | YJR135C | C | MCM22  | 433  | 343   | 0 |
| 7602 | YJR137C | C | ECM17  | 659  | 831   | 0 |
| 7603 | YKL060C | C | FBA1   | 8850 | 10417 | 0 |
| 7604 | YKL062W | W | MSN4   | 864  | 576   | 0 |
| 7605 | YKL064W | W | MNR2   | 1043 | 1134  | 0 |
| 7606 | YKL066W | W |        | 276  | 201   | 1 |
| 7607 | YKL068W | W | NUP100 | 867  | 1034  | 0 |
| 7608 | YKL070W | W |        | 559  | 417   | 0 |
| 7609 | YKL155C | C | RSM22  | 647  | 718   | 0 |
| 7610 | YKL157W | W | APE2   | 1520 | 2009  | 0 |
| 7611 | YKL159C | C | RCN1   | 420  | 440   | 0 |
| 7612 | YKL161C | C |        | 444  | 405   | 0 |
| 7613 | YKL163W | W | PIR3   | 1476 | 2193  | 0 |
| 7614 | YKL165C | C | MCD4   | 398  | 326   | 0 |
| 7615 | YKR026C | C | GCN3   | 894  | 1168  | 0 |
| 7616 | YKR028W | W | SAP190 | 688  | 852   | 0 |
| 7617 | YKR030W | W |        | 880  | 782   | 2 |
| 7618 | YKR032W | W |        | 333  | 245   | 0 |
| 7619 | YKR034W | W | DAL80  | 357  | 263   | 0 |
| 7620 | YKR036C | C | CAF4   | 761  | 852   | 0 |
| 7621 | YLL016W | W | SDC25  | 332  | 241   | 1 |
| 7622 | YLL018C | C | DPS1   | 3399 | 3868  | 0 |
| 7623 | YLL020C | C |        | 536  | 534   | 0 |
| 7624 | YLL022C | C | HIF1   | 658  | 739   | 0 |
| 7625 | YLL024C | C | SSA2   | 3313 | 4744  | 0 |
| 7626 | YLL026W | W | HSP104 | 1222 | 2390  | 0 |
| 7627 | YLR045C | C | STU2   | 592  | 598   | 0 |
| 7628 | YLR047C | C |        | 676  | 576   | 0 |
| 7629 | YLR049C | C |        | 827  | 939   | 0 |
| 7630 | YLR051C | C |        | 793  | 953   | 0 |
| 7631 | YLR053C | C |        | 359  | 279   | 0 |
| 7632 | YLR055C | C | SPT8   | 779  | 1025  | 0 |
| 7633 | YLR141W | W | RRN5   | 291  | 235   | 1 |
| 7634 | YLR143W | W |        | 528  | 667   | 0 |
| 7635 | YLR145W | W |        | 460  | 506   | 0 |
| 7636 | YLR147C | C | SMD3   | 485  | 520   | 0 |
| 7637 | YLR149C | C |        | 367  | 359   | 0 |
| 7638 | YLR151C | C | PCD1   | 458  | 428   | 0 |
| 7639 | YLR237W | W | THI7   | 1265 | 934   | 0 |
| 7640 | YLR239C | C | LIP2   | 551  | 600   | 0 |
| 7641 | YLR241W | W |        | 862  | 1062  | 0 |
| 7642 | YLR243W | W |        | 744  | 861   | 0 |
| 7643 | YLR245C | C | CDD1   | 641  | 552   | 0 |

|      |         |   |        |      |      |   |
|------|---------|---|--------|------|------|---|
| 7644 | YLR247C | C |        | 556  | 835  | 0 |
| 7645 | YLR333C | C | RPS25B | 4860 | 5243 | 0 |
| 7646 | YLR335W | W | NUP2   | 1002 | 1480 | 0 |
| 7647 | YLR337W |   |        | 1070 | 1232 | 0 |
| 7648 | YLR339C | C |        | 5764 | 4453 | 0 |
| 7649 | YLR341W | W | SP077  | 440  | 320  | 0 |
| 7650 | YLR343W | W |        | 740  | 588  | 0 |
| 7651 | YLR429W | W | CRN1   | 1603 | 1942 | 0 |
| 7652 | YLR431C | C |        | 504  | 493  | 0 |
| 7653 | YLR433C | C | CNA1   | 1042 | 964  | 0 |
| 7654 | YLR435W | W |        | 832  | 1098 | 0 |
| 7655 | YLR437C | C |        | 1307 | 1508 | 0 |
| 7656 | YLR439W | W | MRPL4  | 684  | 711  | 0 |
| 7657 | YML069W | W | POB3   | 1416 | 1847 | 0 |
| 7658 | YML071C | C |        | 424  | 446  | 0 |
| 7659 | YML074C | C | FPR3   | 4042 | 5407 | 0 |
| 7660 | YML076C | C |        | 402  | 426  | 0 |
| 7661 | YML078W | W | CPR3   | 1611 | 2101 | 0 |
| 7662 | YML080W | W | DUS1   | 528  | 780  | 0 |
| 7663 | YMR040W | W |        | 355  | 356  | 0 |
| 7664 | YMR042W | W | ARG80  | 529  | 573  | 0 |
| 7665 | YMR044W | W | IOC4   | 1094 | 1344 | 0 |
| 7666 | YMR047C | C | NUP116 | 1192 | 1499 | 0 |
| 7667 | YMR049C | C | ERB1   | 2354 | 2984 | 0 |
| 7668 | YMR052W | W | FAR3   | 475  | 486  | 0 |
| 7669 | YMR148W | W |        | 707  | 781  | 0 |
| 7670 | YMR150C | C | IMP1   | 683  | 716  | 0 |
| 7671 | YMR152W | W | YIM1   | 924  | 1104 | 0 |
| 7672 | YMR154C | C | RIM13  | 478  | 450  | 0 |
| 7673 | YMR156C | C | TPP1   | 502  | 488  | 0 |
| 7674 | YMR158W | W |        | 529  | 585  | 0 |
| 7675 | YMR255W | W | GFD1   | 716  | 835  | 0 |
| 7676 | YMR258C | C |        | 625  | 618  | 0 |
| 7677 | YMR260C | C | TIF11  | 2736 | 3078 | 0 |
| 7678 | YMR262W | W |        | 622  | 516  | 0 |
| 7679 | YMR264W | W | CUE1   | 1235 | 1193 | 0 |
| 7680 | YMR266W | W | RSN1   | 379  | 325  | 1 |
| 7681 | YNL030W | W | HHF2   | 2932 | 2382 | 0 |
| 7682 | YNL032W | W | SIW14  | 744  | 865  | 0 |
| 7683 | YNL034W | W |        | 389  | 328  | 0 |
| 7684 | YNL036W | W | NCE103 | 607  | 1683 | 0 |
| 7685 | YNL038W | W | GPI15  | 783  | 941  | 0 |
| 7686 | YNL040W | W |        | 536  | 643  | 0 |
| 7687 | YNL126W | W | SPC98  | 585  | 507  | 0 |
| 7688 | YNL128W | W | TEP1   | 376  | 319  | 0 |
| 7689 | YNL130C | C | CPT1   | 1261 | 1608 | 0 |
| 7690 | YNL132W | W | KRE33  | 1523 | 1623 | 0 |
| 7691 | YNL134C | C |        | 1710 | 1363 | 0 |
| 7692 | YNL136W | W |        | 837  | 1065 | 0 |
| 7693 | YNL222W | W | SSU72  | 277  | 205  | 1 |
| 7694 | YNL224C | C |        | 714  | 978  | 0 |
| 7695 | YNL226W | W |        | 426  | 429  | 0 |

|      |         |   |       |      |      |   |
|------|---------|---|-------|------|------|---|
| 7696 | YNL228W | W |       | 703  | 959  | 0 |
| 7697 | YNL230C | C | ELA1  | 489  | 563  | 0 |
| 7698 | YNL232W | W | CSL4  | 820  | 1086 | 1 |
| 7699 | YNL318C | C | HXT14 | 301  | 230  | 0 |
| 7700 | YNL320W | W |       | 744  | 706  | 0 |
| 7701 | YNL322C | C | KRE1  | 2015 | 2637 | 0 |
| 7702 | YNL324W | W |       | 408  | 347  | 0 |
| 7703 | YNL326C | C |       | 1059 | 1212 | 0 |
| 7704 | YNL328C | C | MDJ2  | 479  | 384  | 0 |
| 7705 | YNR075W | W | COS10 | 456  | 396  | 0 |
| 7706 | YNR077C | C |       | 428  | 334  | 0 |
| 7707 | YOL002C | C |       | 712  | 679  | 0 |
| 7708 | YOL004W | W | SIN3  | 315  | 267  | 1 |
| 7709 | YOL006C | C | TOP1  | 663  | 1174 | 0 |
| 7710 | YOL008W | W |       | 543  | 576  | 0 |
| 7711 | YOL093W | W |       | 776  | 1017 | 0 |
| 7712 | YOL095C | C | HMI1  | 523  | 516  | 0 |
| 7713 | YOL097C | C | WRS1  | 2578 | 2781 | 0 |
| 7714 | YOL099C | C |       | 786  | 824  | 0 |
| 7715 | YOL101C | C |       | 678  | 669  | 0 |
| 7716 | YOL103W | W | ITR2  | 1252 | 1343 | 0 |
| 7717 | YOR023C | C | AHC1  | 892  | 1098 | 0 |
| 7718 | YOR025W | W | HST3  | 1091 | 978  | 0 |
| 7719 | YOR027W | W | STI1  | 2600 | 5335 | 0 |
| 7720 | YOR029W | W |       | 345  | 250  | 0 |
| 7721 | YOR031W | W | CRS5  | 354  | 396  | 0 |
| 7722 | YOR033C | C | EX01  | 350  | 399  | 0 |
| 7723 | YOR119C | C | RI01  | 928  | 1159 | 0 |
| 7724 | YOR121C | C |       | 601  | 835  | 0 |
| 7725 | YOR123C | C | LE01  | 1285 | 1649 | 0 |
| 7726 | YOR125C | C | CAT5  | 612  | 625  | 0 |
| 7727 | YOR127W | W | RGA1  | 2712 | 2025 | 0 |
| 7728 | YOR129C | C |       | 397  | 362  | 0 |
| 7729 | YOR215C | C |       | 4321 | 3093 | 0 |
| 7730 | YOR217W | W | RFC1  | 967  | 1054 | 0 |
| 7731 | YOR219C | C | STE13 | 791  | 806  | 0 |
| 7732 | YOR221C | C | MCT1  | 997  | 1359 | 0 |
| 7733 | YOR223W | W |       | 445  | 412  | 0 |
| 7734 | YOR225W | W |       | 519  | 563  | 0 |
| 7735 | YOR311C | C | HSD1  | 1196 | 1229 | 0 |
| 7736 | YOR313C | C | SPS4  | 375  | 279  | 0 |
| 7737 | YOR315W | W |       | 1287 | 1010 | 0 |
| 7738 | YOR317W | W | FAA1  | 2231 | 2939 | 0 |
| 7739 | YOR319W | W | HSH49 | 641  | 709  | 0 |
| 7740 | YOR321W | W | PMT3  | 916  | 950  | 0 |
| 7741 | YPL013C | C |       | 729  | 922  | 0 |
| 7742 | YPL015C | C | HST2  | 653  | 649  | 0 |
| 7743 | YPL017C | C |       | 337  | 388  | 0 |
| 7744 | YPL019C | C | VTC3  | 353  | 574  | 0 |
| 7745 | YPL021W | W | ECM23 | 284  | 209  | 0 |
| 7746 | YPL023C | C | MET12 | 361  | 384  | 0 |
| 7747 | YPL109C | C |       | 398  | 361  | 0 |

|      |         |   |       |      |      |   |
|------|---------|---|-------|------|------|---|
| 7748 | YPL111W | W | CAR1  | 853  | 829  | 0 |
| 7749 | YPL113C | C |       | 412  | 363  | 0 |
| 7750 | YPL115C | C | BEM3  | 306  | 294  | 0 |
| 7751 | YPL117C | C | IDI1  | 516  | 787  | 0 |
| 7752 | YPL119C | C | DBP1  | 417  | 386  | 0 |
| 7753 | YPL205C | C |       | 687  | 894  | 0 |
| 7754 | YPL207W | W |       | 1232 | 1308 | 0 |
| 7755 | YPL209C | C | IPL1  | 296  | 262  | 0 |
| 7756 | YPL211W | W | NIP7  | 846  | 1001 | 0 |
| 7757 | YPL213W | W | LEA1  | 498  | 574  | 0 |
| 7758 | YPL215W | W | CBP3  | 297  | 268  | 1 |
| 7759 | YPR018W | W | RLF2  | 519  | 741  | 0 |
| 7760 | YPR020W | W | ATP20 | 850  | 788  | 0 |
| 7761 | YPR022C | C |       | 364  | 364  | 0 |
| 7762 | YPR024W | W | YME1  | 1125 | 1636 | 0 |
| 7763 | YPR026W | W | ATH1  | 368  | 432  | 0 |
| 7764 | YPR028W | W | YOP1  | 1616 | 2398 | 0 |
| 7765 | YPR114W | W |       | 1474 | 1511 | 0 |
| 7766 | YPR116W | W |       | 546  | 503  | 0 |
| 7767 | YPR118W | W |       | 1349 | 1508 | 0 |
| 7768 | YPR120C | C | CLB5  | 677  | 868  | 0 |
| 7769 | YPR122W | W | AXL1  | 277  | 227  | 1 |
| 7770 | YPR124W | W | CTR1  | 1370 | 2488 | 0 |
| 7771 | EMPTY   |   |       | 279  | 215  | 0 |
| 7772 | EMPTY   |   |       | 303  | 241  | 0 |
| 7773 | EMPTY   |   |       | 386  | 412  | 0 |
| 7774 | EMPTY   |   |       | 507  | 554  | 1 |
| 7775 | EMPTY   |   |       | 425  | 459  | 0 |
| 7776 | EMPTY   |   |       | 258  | 183  | 0 |
| 7777 | NORF 75 |   |       | 344  | 299  | 0 |
| 7778 | NORF 79 |   |       | 502  | 414  | 0 |
| 7779 | NORF 83 |   |       | 454  | 389  | 0 |
| 7780 | NORF 87 |   |       | 322  | 271  | 1 |
| 7781 | NORF 91 |   |       | 433  | 384  | 0 |
| 7782 | NORF 95 |   |       | 364  | 316  | 0 |
| 7783 | YDR095C | C |       | 459  | 388  | 0 |
| 7784 | YDR135C | C | YCF1  | 352  | 312  | 1 |
| 7785 | YDR207C | C | UME6  | 480  | 650  | 2 |
| 7786 | YDR232W | W | HEM1  | 2517 | 2509 | 0 |
| 7787 | YDR274C | C |       | 597  | 621  | 0 |
| 7788 | YDR295C | C | PL02  | 791  | 959  | 0 |
| 7789 | YIL172C | C |       | 629  | 591  | 0 |
| 7790 | YIR019C | C | MUC1  | 311  | 258  | 1 |
| 7791 | YJL054W | W | TIM54 | 987  | 1342 | 0 |
| 7792 | YJL109C | C |       | 594  | 762  | 2 |
| 7793 | YJL118W | W |       | 509  | 469  | 0 |
| 7794 | YJL130C | C | URA2  | 519  | 562  | 1 |
| 7795 | YNR068C | C |       | 456  | 390  | 0 |
| 7796 | YNR070W | W |       | 375  | 365  | 2 |
| 7797 | YOL041C | C | NOP12 | 2121 | 2967 | 0 |
| 7798 | YOL078W | W |       | 413  | 588  | 2 |
| 7799 | YOL110W | W | SHR5  | 405  | 343  | 0 |

|      |              |   |       |       |       |   |
|------|--------------|---|-------|-------|-------|---|
| 7800 | YOR015W      | W |       | 1328  | 1198  | 0 |
| 7801 | EMPTY        |   |       | 383   | 346   | 0 |
| 7802 | EMPTY        |   |       | 353   | 333   | 0 |
| 7803 | EMPTY        |   |       | 357   | 333   | 0 |
| 7804 | EMPTY        |   |       | 537   | 642   | 0 |
| 7805 | EMPTY        |   |       | 404   | 396   | 0 |
| 7806 | EMPTY        |   |       | 1080  | 1196  | 0 |
| 7807 | YLR390W-F    | W | CCW14 | 3956  | 4623  | 0 |
| 7808 | YHR021W-F    | W | ECM12 | 611   | 738   | 0 |
| 7809 | YIL071C      | C | PCI8  | 648   | 659   | 0 |
| 7810 | YDL045W-F    | W | MRP10 | 697   | 978   | 0 |
| 7811 | YBR286W-FULL |   |       | 3616  | 6453  | 0 |
| 7812 | YBR286W-100  |   |       | 2382  | 4496  | 0 |
| 7813 | EMPTY        |   |       | 353   | 301   | 0 |
| 7814 | EMPTY        |   |       | 315   | 277   | 0 |
| 7815 | EMPTY        |   |       | 369   | 386   | 0 |
| 7816 | EMPTY        |   |       | 317   | 273   | 0 |
| 7817 | EMPTY        |   |       | 297   | 255   | 0 |
| 7818 | EMPTY        |   |       | 311   | 263   | 0 |
| 7819 | YLR310C      | C | CDC25 | 413   | 473   | 0 |
| 7820 | YLR419W      | W |       | 381   | 461   | 0 |
| 7821 | YLR430W      | W | SEN1  | 457   | 628   | 0 |
| 7822 | YML059C      | C |       | 456   | 510   | 0 |
| 7823 | YML075C      | C | HMG1  | 697   | 757   | 0 |
| 7824 | YMR176W      | W | ECM5  | 414   | 404   | 0 |
| 7825 | YPR042C      | C | PUF2  | 476   | 439   | 0 |
| 7826 | YBR286W-750  |   |       | 942   | 1830  | 1 |
| 7827 | YBR286W-850  |   |       | 373   | 337   | 1 |
| 7828 | YBR286W-950  |   |       | 363   | 341   | 1 |
| 7829 | YBR286W-1050 |   |       | 376   | 344   | 1 |
| 7830 | YBR286W-1150 |   |       | 366   | 355   | 1 |
| 7831 | YOR086C      | C |       | 719   | 966   | 1 |
| 7832 | YOR269W      | W | PAC1  | 800   | 866   | 0 |
| 7833 | YOR291W      | W |       | 577   | 563   | 0 |
| 7834 | YOR335C      | C | ALA1  | 3546  | 3490  | 0 |
| 7835 | YOR337W      | W | TEA1  | 762   | 1178  | 0 |
| 7836 | YOR339C      | C | UBC11 | 19929 | 18030 | 0 |
| 7837 | EMPTY        |   |       | 337   | 316   | 0 |
| 7838 | EMPTY        |   |       | 330   | 324   | 0 |
| 7839 | EMPTY        |   |       | 367   | 332   | 0 |
| 7840 | EMPTY        |   |       | 351   | 324   | 0 |
| 7841 | EMPTY        |   |       | 391   | 334   | 0 |
| 7842 | EMPTY        |   |       | 318   | 290   | 0 |
| 7843 | EMPTY        |   |       | 479   | 582   | 0 |
| 7844 | EMPTY        |   |       | 326   | 276   | 0 |
| 7845 | EMPTY        |   |       | 321   | 271   | 0 |
| 7846 | EMPTY        |   |       | 331   | 276   | 0 |
| 7847 | EMPTY        |   |       | 306   | 271   | 0 |
| 7848 | EMPTY        |   |       | 303   | 248   | 0 |
| 7849 | YGL122C      | C | NAB2  | 458   | 502   | 1 |
| 7850 | YGL173C      | C | KEM1  | 510   | 551   | 1 |
| 7851 | YGR070W      | W | ROM1  | 432   | 417   | 0 |

|                |       |     |     |   |
|----------------|-------|-----|-----|---|
| 7852 YGR073C C |       | 666 | 673 | 1 |
| 7853 YHR014W W | SP013 | 381 | 379 | 1 |
| 7854 YHR143BW  |       | 406 | 415 | 1 |
| 7855 EMPTY     |       | 392 | 409 | 0 |
| 7856 EMPTY     |       | 400 | 401 | 0 |
| 7857 EMPTY     |       | 395 | 391 | 0 |
| 7858 EMPTY     |       | 389 | 389 | 0 |
| 7859 EMPTY     |       | 381 | 364 | 0 |
| 7860 EMPTY     |       | 765 | 511 | 0 |
| 7861 EMPTY     |       | 380 | 368 | 0 |
| 7862 EMPTY     |       | 381 | 375 | 0 |
| 7863 EMPTY     |       | 362 | 371 | 0 |
| 7864 EMPTY     |       | 375 | 374 | 0 |
| 7865 EMPTY     |       | 358 | 347 | 0 |
| 7866 EMPTY     |       | 354 | 335 | 0 |
| 7867 EMPTY     |       | 345 | 326 | 0 |
| 7868 EMPTY     |       | 357 | 324 | 0 |
| 7869 EMPTY     |       | 358 | 310 | 0 |
| 7870 EMPTY     |       | 347 | 312 | 0 |
| 7871 EMPTY     |       | 348 | 307 | 0 |
| 7872 EMPTY     |       | 323 | 294 | 0 |
| 7873 3XSSC     |       | 421 | 407 | 0 |
| 7874 3XSSC     |       | 422 | 412 | 0 |
| 7875 3XSSC     |       | 442 | 442 | 0 |
| 7876 3XSSC     |       | 413 | 403 | 0 |
| 7877 3XSSC     |       | 413 | 409 | 0 |
| 7878 3XSSC     |       | 408 | 428 | 0 |
| 7879 EMPTY     |       | 393 | 433 | 0 |
| 7880 EMPTY     |       | 409 | 447 | 0 |
| 7881 EMPTY     |       | 408 | 431 | 0 |
| 7882 EMPTY     |       | 407 | 418 | 0 |
| 7883 EMPTY     |       | 401 | 424 | 0 |
| 7884 EMPTY     |       | 401 | 405 | 0 |
| 7885 EMPTY     |       | 388 | 416 | 0 |
| 7886 EMPTY     |       | 413 | 434 | 0 |
| 7887 EMPTY     |       | 422 | 448 | 0 |
| 7888 EMPTY     |       | 422 | 441 | 0 |
| 7889 EMPTY     |       | 397 | 408 | 0 |
| 7890 EMPTY     |       | 397 | 390 | 0 |
| 7891 EMPTY     |       | 383 | 374 | 0 |
| 7892 EMPTY     |       | 374 | 374 | 0 |
| 7893 EMPTY     |       | 369 | 364 | 0 |
| 7894 EMPTY     |       | 375 | 346 | 0 |
| 7895 EMPTY     |       | 354 | 348 | 0 |
| 7896 EMPTY     |       | 365 | 348 | 0 |
| 7897 3XSSC     |       | 467 | 467 | 0 |
| 7898 3XSSC     |       | 450 | 445 | 0 |
| 7899 3XSSC     |       | 442 | 488 | 0 |
| 7900 3XSSC     |       | 428 | 439 | 0 |
| 7901 3XSSC     |       | 448 | 489 | 0 |
| 7902 3XSSC     |       | 443 | 472 | 0 |
| 7903 EMPTY     |       | 447 | 478 | 0 |

|      |         |   |       |      |      |   |
|------|---------|---|-------|------|------|---|
| 7904 | EMPTY   |   | 431   | 456  | 0    |   |
| 7905 | EMPTY   |   | 427   | 460  | 0    |   |
| 7906 | EMPTY   |   | 426   | 460  | 0    |   |
| 7907 | EMPTY   |   | 429   | 429  | 0    |   |
| 7908 | EMPTY   |   | 423   | 453  | 0    |   |
| 7909 | EMPTY   |   | 419   | 433  | 0    |   |
| 7910 | EMPTY   |   | 403   | 442  | 0    |   |
| 7911 | EMPTY   |   | 429   | 449  | 0    |   |
| 7912 | EMPTY   |   | 452   | 492  | 0    |   |
| 7913 | EMPTY   |   | 464   | 491  | 0    |   |
| 7914 | EMPTY   |   | 444   | 499  | 0    |   |
| 7915 | EMPTY   |   | 443   | 443  | 0    |   |
| 7916 | EMPTY   |   | 423   | 436  | 0    |   |
| 7917 | EMPTY   |   | 413   | 424  | 0    |   |
| 7918 | EMPTY   |   | 396   | 398  | 0    |   |
| 7919 | EMPTY   |   | 400   | 394  | 0    |   |
| 7920 | EMPTY   |   | 403   | 391  | 0    |   |
| 7921 | YBR244W | W | GPX2  | 996  | 884  | 0 |
| 7922 | YBR246W | W |       | 691  | 648  | 0 |
| 7923 | YBR248C | C | HIS7  | 712  | 906  | 0 |
| 7924 | YBR250W | W |       | 336  | 235  | 0 |
| 7925 | YBR252W | W | DUT1  | 758  | 715  | 0 |
| 7926 | YBR254C | C | TRS20 | 537  | 497  | 0 |
| 7927 | YCL039W | W |       | 330  | 258  | 1 |
| 7928 | YCL041C | C |       | 639  | 601  | 0 |
| 7929 | YCL043C | C | PDI1  | 4428 | 5400 | 0 |
| 7930 | YCL045C | C |       | 1513 | 1422 | 0 |
| 7931 | YCL047C | C |       | 530  | 480  | 0 |
| 7932 | YCL049C | C |       | 535  | 439  | 0 |
| 7933 | YCR047C | C | BUD23 | 423  | 415  | 0 |
| 7934 | YCR049C | C |       | 349  | 249  | 0 |
| 7935 | YCR051W | W |       | 371  | 331  | 0 |
| 7936 | YCR053W | W | THR4  | 818  | 924  | 0 |
| 7937 | YCR055C |   |       | 986  | 1064 | 0 |
| 7938 | YCR057C | C | PWP2  | 598  | 605  | 0 |
| 7939 | YDL015C | C | TSC13 | 1565 | 1583 | 0 |
| 7940 | YDL017W | W | CDC7  | 398  | 322  | 0 |
| 7941 | YDL019C | C | OSH2  | 450  | 455  | 1 |
| 7942 | YDL021W | W | GPM2  | 411  | 481  | 0 |
| 7943 | YDL023C | C |       | 2411 | 1343 | 0 |
| 7944 | YDL025C | C |       | 594  | 490  | 0 |
| 7945 | YDL111C | C | RRP42 | 522  | 543  | 0 |
| 7946 | YDL113C | C |       | 256  | 182  | 1 |
| 7947 | YDL115C | C | IWR1  | 325  | 286  | 0 |
| 7948 | YDL117W | W | CYK3  | 332  | 284  | 0 |
| 7949 | YDL119C | C |       | 355  | 297  | 0 |
| 7950 | YDL121C | C |       | 299  | 185  | 0 |
| 7951 | YDL207W | W | GLE1  | 269  | 162  | 0 |
| 7952 | YDL209C | C |       | 263  | 158  | 0 |
| 7953 | YDL211C | C |       | 250  | 156  | 0 |
| 7954 | YDL213C | C | FYV14 | 247  | 154  | 0 |
| 7955 | YDL215C | C | GDH2  | 251  | 157  | 0 |

|      |         |   |        |      |      |   |
|------|---------|---|--------|------|------|---|
| 7956 | YDL217C | C | TIM22  | 243  | 147  | 0 |
| 7957 | YDR055W | W | PST1   | 508  | 667  | 0 |
| 7958 | YDR057W | W |        | 320  | 267  | 0 |
| 7959 | YDR059C | C | UBC5   | 401  | 339  | 0 |
| 7960 | YDR061W | W |        | 448  | 474  | 0 |
| 7961 | YDR063W | W |        | 602  | 642  | 0 |
| 7962 | YDR065W | W |        | 431  | 438  | 0 |
| 7963 | YDR151C | C | CTH1   | 648  | 553  | 0 |
| 7964 | YDR153C | C |        | 809  | 839  | 0 |
| 7965 | YDR155C | C | CPR1   | 3292 | 4890 | 0 |
| 7966 | YDR157W | W |        | 733  | 681  | 0 |
| 7967 | YDR159W | W | SAC3   | 368  | 376  | 0 |
| 7968 | YDR161W | W | TCI1   | 880  | 872  | 0 |
| 7969 | YDR261C | C | EXG2   | 1099 | 1184 | 0 |
| 7970 | YDR262W | W |        | 788  | 769  | 0 |
| 7971 | YDR263C | C | DIN7   | 459  | 346  | 0 |
| 7972 | YDR264C | C | AKR1   | 865  | 995  | 0 |
| 7973 | YDR265W | W | PEX10  | 480  | 419  | 0 |
| 7974 | YDR266C | C |        | 1008 | 1259 | 0 |
| 7975 | YDR343C | C | HXT6   | 2991 | 2391 | 0 |
| 7976 | YDR345C | C | HXT3   | 2136 | 961  | 0 |
| 7977 | YDR347W | W | MRP1   | 809  | 854  | 0 |
| 7978 | YDR349C | C | YPS7   | 758  | 714  | 0 |
| 7979 | YDR351W | W | SBE2   | 537  | 590  | 0 |
| 7980 | YDR353W | W | TRR1   | 1916 | 2338 | 0 |
| 7981 | YDR439W | W | LRS4   | 525  | 433  | 0 |
| 7982 | YDR441C | C | APT2   | 622  | 459  | 0 |
| 7983 | YDR443C | C | SSN2   | 496  | 473  | 0 |
| 7984 | YDR445C | C |        | 497  | 352  | 0 |
| 7985 | YDR447C | C | RPS17B | 2538 | 2466 | 0 |
| 7986 | YDR449C | C |        | 998  | 1163 | 0 |
| 7987 | YDR535C | C |        | 354  | 218  | 0 |
| 7988 | YDR537C | C |        | 485  | 322  | 0 |
| 7989 | YDR539W | W |        | 536  | 415  | 0 |
| 7990 | YDR541C | C |        | 571  | 451  | 0 |
| 7991 | YDR543C | C |        | 439  | 290  | 0 |
| 7992 | YDR545W | W | YRF1-1 | 429  | 392  | 0 |
| 7993 | YAR037W |   |        | 256  | 158  | 0 |
| 7994 | YAR042W | W | SWH1   | 411  | 370  | 0 |
| 7995 | YAR044W | W | OSH1   | 261  | 167  | 1 |
| 7996 | YAR050W | W | FLO1   | 282  | 181  | 1 |
| 7997 | YAR053W | W |        | 316  | 229  | 0 |
| 7998 | YAR061W | W |        | 321  | 215  | 0 |
| 7999 | YBL076C | C | ILS1   | 1437 | 1390 | 0 |
| 8000 | YBL078C | C | AUT7   | 401  | 347  | 0 |
| 8001 | YBL080C | C | PET112 | 380  | 288  | 0 |
| 8002 | YBL082C | C | RHK1   | 721  | 556  | 0 |
| 8003 | YBL084C | C | CDC27  | 280  | 177  | 0 |
| 8004 | YBL086C | C |        | 421  | 317  | 0 |
| 8005 | YBR055C | C | PRP6   | 367  | 380  | 0 |
| 8006 | YBR057C | C | MUM2   | 486  | 442  | 0 |
| 8007 | YBR059C | C | AKL1   | 454  | 486  | 0 |

|      |          |   |        |      |      |   |
|------|----------|---|--------|------|------|---|
| 8008 | YBR061C  | C |        | 560  | 546  | 0 |
| 8009 | YBR063C  | C |        | 427  | 440  | 0 |
| 8010 | YBR065C  | C | ECM2   | 480  | 474  | 0 |
| 8011 | YBR149W  | W | ARA1   | 957  | 2075 | 0 |
| 8012 | YBR151W  | W | APD1   | 580  | 653  | 0 |
| 8013 | YBR153W  | W | RIB7   | 487  | 497  | 0 |
| 8014 | YBR155W  | W | CNS1   | 691  | 887  | 0 |
| 8015 | YBR157C  | C | ICS2   | 433  | 447  | 0 |
| 8016 | YBR159W  | W |        | 1145 | 1060 | 0 |
| 8017 | YER008C  | C | SEC3   | 313  | 264  | 1 |
| 8018 | YER010C  | C |        | 578  | 563  | 0 |
| 8019 | YER012W  | W | PRE1   | 927  | 1326 | 0 |
| 8020 | YER014W  | W | HEM14  | 299  | 316  | 0 |
| 8021 | YER016W  | W | BIM1   | 588  | 664  | 0 |
| 8022 | YER018C  | C | SPC25  | 371  | 297  | 0 |
| 8023 | YER100W  | W | UBC6   | 829  | 949  | 0 |
| 8024 | YER102W  | W | RPS8B  | 6994 | 6984 | 0 |
| 8025 | YER104W  | W | RTT105 | 485  | 369  | 0 |
| 8026 | YER106W  | W | MAM1   | 348  | 229  | 0 |
| 8027 | YER108C  |   |        | 493  | 448  | 0 |
| 8028 | YER110C  | C | KAP123 | 426  | 283  | 0 |
| 8029 | YFL004W  | W | VTC2   | 1590 | 1770 | 0 |
| 8030 | YFL006W  | W |        | 1130 | 1125 | 0 |
| 8031 | YFL008W  | W | SMC1   | 541  | 646  | 0 |
| 8032 | YFL010BW |   |        | 804  | 1057 | 0 |
| 8033 | YFL011W  | W | HXT10  | 351  | 237  | 0 |
| 8034 | YFL013C  | C | IES1   | 674  | 721  | 0 |
| 8035 | YFR031BC |   |        | 7111 | 6152 | 0 |
| 8036 | YFR032C  | C |        | 321  | 218  | 0 |
| 8037 | YFR034C  | C | PH04   | 270  | 190  | 1 |
| 8038 | YFR036W  | W | CDC26  | 446  | 413  | 0 |
| 8039 | YFR038W  | W |        | 719  | 745  | 0 |
| 8040 | YFR040W  | W | SAP155 | 626  | 614  | 0 |
| 8041 | YGL069C  | C |        | 850  | 900  | 0 |
| 8042 | YGL071W  | W | RCS1   | 276  | 214  | 1 |
| 8043 | YGL073W  | W | HSF1   | 760  | 840  | 0 |
| 8044 | YGL075C  | C | MPS2   | 435  | 332  | 0 |
| 8045 | YGL077C  | C | HN1    | 1209 | 1126 | 0 |
| 8046 | YGL079W  | W |        | 564  | 572  | 0 |
| 8047 | YGL165C  | C |        | 511  | 461  | 0 |
| 8048 | YGL167C  | C | PMR1   | 512  | 465  | 1 |
| 8049 | YGL169W  | W | SUA5   | 785  | 735  | 0 |
| 8050 | YGL171W  | W | ROK1   | 933  | 1066 | 0 |
| 8051 | YGL173C  | C | KEM1   | 576  | 565  | 1 |
| 8052 | YGL175C  | C | SAE2   | 446  | 327  | 0 |
| 8053 | YGL261C  | C |        | 701  | 527  | 0 |
| 8054 | YGL263W  | W | COS12  | 407  | 281  | 0 |
| 8055 | YGR002C  | C |        | 584  | 574  | 0 |
| 8056 | YGR004W  | W |        | 641  | 510  | 0 |
| 8057 | YGR006W  | W | PRP18  | 438  | 345  | 0 |
| 8058 | YGR008C  | C | STF2   | 507  | 523  | 0 |
| 8059 | YGR094W  | W | VAS1   | 1555 | 1346 | 0 |

|      |         |   |        |      |       |   |
|------|---------|---|--------|------|-------|---|
| 8060 | YGR096W | W |        | 439  | 310   | 0 |
| 8061 | YGR098C | C | ESP1   | 348  | 310   | 1 |
| 8062 | YGR100W | W | MDR1   | 508  | 554   | 0 |
| 8063 | YGR102C | C |        | 571  | 596   | 0 |
| 8064 | YGR104C | C | SRB5   | 501  | 427   | 0 |
| 8065 | YGR190C | C |        | 814  | 772   | 0 |
| 8066 | YGR192C | C | TDH3   | 6933 | 10050 | 0 |
| 8067 | YGR194C | C | XKS1   | 474  | 387   | 0 |
| 8068 | YGR196C | C | FYV8   | 438  | 436   | 0 |
| 8069 | YGR198W | W |        | 592  | 567   | 0 |
| 8070 | YGR200C | C | ELP2   | 1070 | 1173  | 0 |
| 8071 | YGR286C | C | BI02   | 488  | 476   | 0 |
| 8072 | YGR288W | W | MAL13  | 394  | 253   | 0 |
| 8073 | YGR290W | W |        | 342  | 200   | 0 |
| 8074 | YGR292W | W | MAL12  | 256  | 157   | 1 |
| 8075 | YGR294W | W |        | 549  | 425   | 0 |
| 8076 | YGR296W | W | YRF1-3 | 306  | 203   | 1 |
| 8077 | YHR036W | W |        | 423  | 377   | 0 |
| 8078 | YHR038W | W | FIL1   | 458  | 402   | 0 |
| 8079 | YHR039C | C | MSC7   | 275  | 177   | 1 |
| 8080 | YHR041C | C | SRB2   | 714  | 619   | 0 |
| 8081 | YHR043C | C | DOG2   | 604  | 626   | 0 |
| 8082 | YHR045W | W |        | 618  | 607   | 0 |
| 8083 | YHR130C | C |        | 363  | 281   | 0 |
| 8084 | YHR132C | C | ECM14  | 1067 | 1073  | 0 |
| 8085 | YHR134W | W | WSS1   | 543  | 485   | 0 |
| 8086 | YHR136C | C | SPL2   | 351  | 477   | 0 |
| 8087 | YHR138C | C |        | 439  | 486   | 0 |
| 8088 | YHR140W | W |        | 337  | 279   | 0 |
| 8089 | YIL006W | W |        | 462  | 312   | 0 |
| 8090 | YIL008W | W | URM1   | 619  | 500   | 0 |
| 8091 | YIL010W | W | DOT5   | 713  | 974   | 0 |
| 8092 | YIL012W | W |        | 304  | 202   | 0 |
| 8093 | YIL014W | W | MNT3   | 693  | 732   | 0 |
| 8094 | YIL016W | W | SNL1   | 2451 | 1435  | 0 |
| 8095 | YIL103W | W |        | 692  | 708   | 0 |
| 8096 | YIL105C | C |        | 335  | 349   | 1 |
| 8097 | YIL107C | C | PFK26  | 511  | 482   | 0 |
| 8098 | YIL109C | C | SEC24  | 2887 | 2374  | 0 |
| 8099 | YIL111W | W | COX5B  | 598  | 942   | 0 |
| 8100 | YIL113W | W |        | 579  | 430   | 0 |
| 8101 | YIR022W | W | SEC11  | 987  | 907   | 0 |
| 8102 | YIR024C | C | GIF1   | 431  | 411   | 0 |
| 8103 | YIR026C | C | YVH1   | 677  | 684   | 0 |
| 8104 | YIR028W | W | DAL4   | 386  | 280   | 0 |
| 8105 | YIR030C | C | DCG1   | 358  | 287   | 0 |
| 8106 | YIR032C | C | DAL3   | 347  | 255   | 0 |
| 8107 | YJL075C | C |        | 1213 | 1203  | 0 |
| 8108 | YJL077C | C | ICS3   | 667  | 515   | 0 |
| 8109 | YJL079C | C | PRY1   | 1696 | 1601  | 0 |
| 8110 | YJL081C | C | ARP4   | 791  | 864   | 0 |
| 8111 | YJL083W | W |        | 555  | 480   | 0 |

|      |         |   |        |      |      |   |
|------|---------|---|--------|------|------|---|
| 8112 | YJL085W | W | EX070  | 353  | 314  | 0 |
| 8113 | YJL171C | C |        | 667  | 627  | 1 |
| 8114 | YJL173C | C | RFA3   | 693  | 642  | 0 |
| 8115 | YJL175W | W |        | 654  | 570  | 0 |
| 8116 | YJL177W | W | RPL17B | 4923 | 4944 | 0 |
| 8117 | YJL179W | W | PFD1   | 508  | 541  | 0 |
| 8118 | YJL181W | W |        | 357  | 297  | 0 |
| 8119 | YJR042W | W | NUP85  | 270  | 185  | 1 |
| 8120 | YJR044C | C |        | 589  | 589  | 0 |
| 8121 | YJR046W | W | TAH11  | 670  | 682  | 0 |
| 8122 | YJR048W | W | CYC1   | 565  | 532  | 0 |
| 8123 | YJR050W | W | ISY1   | 573  | 584  | 0 |
| 8124 | YJR052W | W | RAD7   | 537  | 537  | 0 |
| 8125 | YJR139C | C | HOM6   | 2315 | 2616 | 0 |
| 8126 | YJR141W | W |        | 555  | 532  | 0 |
| 8127 | YJR143C | C | PMT4   | 2112 | 1680 | 0 |
| 8128 | YJR145C | C | RPS4A  | 7825 | 7210 | 0 |
| 8129 | YJR147W | W | HMS2   | 881  | 705  | 0 |
| 8130 | YJR149W | W |        | 418  | 424  | 0 |
| 8131 | YKL072W | W | STB6   | 467  | 445  | 0 |
| 8132 | YKL074C | C | MUD2   | 534  | 607  | 0 |
| 8133 | YKL076C | C |        | 530  | 522  | 0 |
| 8134 | YKL078W | W |        | 580  | 674  | 0 |
| 8135 | YKL080W | W | VMA5   | 2325 | 2260 | 0 |
| 8136 | YKL082C | C |        | 1585 | 2128 | 0 |
| 8137 | YKL167C | C | MRP49  | 534  | 484  | 0 |
| 8138 | YKL169C | C |        | 468  | 417  | 0 |
| 8139 | YKL171W | W |        | 371  | 309  | 0 |
| 8140 | YKL173W | W | SNU114 | 392  | 393  | 0 |
| 8141 | YKL175W | W | ZRT3   | 1001 | 1067 | 0 |
| 8142 | YKL177W | W |        | 308  | 195  | 0 |
| 8143 | YKR038C | C |        | 919  | 973  | 0 |
| 8144 | YKR040C | C |        | 375  | 288  | 2 |
| 8145 | YKR042W | W | UTH1   | 7373 | 6749 | 0 |
| 8146 | YKR044W | W |        | 565  | 487  | 0 |
| 8147 | YKR046C | C |        | 865  | 955  | 0 |
| 8148 | YKR048C | C | NAP1   | 1616 | 2373 | 0 |
| 8149 | YLL028W | W | TP01   | 533  | 373  | 0 |
| 8150 | YLL030C | C |        | 316  | 203  | 0 |
| 8151 | YLL032C | C |        | 264  | 168  | 1 |
| 8152 | YLL034C | C |        | 616  | 810  | 0 |
| 8153 | YLL036C | C | PRP19  | 615  | 660  | 0 |
| 8154 | YLL038C | C | ENT4   | 464  | 442  | 0 |
| 8155 | YLR057W | W |        | 540  | 604  | 0 |
| 8156 | YLR059C | C | REX2   | 996  | 792  | 0 |
| 8157 | YLR061W | W | RPL22A | 2707 | 2984 | 0 |
| 8158 | YLR063W | W |        | 543  | 589  | 0 |
| 8159 | YLR065C | C |        | 996  | 988  | 0 |
| 8160 | YLR067C | C | PET309 | 469  | 421  | 0 |
| 8161 | YLR153C | C | ACS2   | 2320 | 2472 | 0 |
| 8162 | YLR155C | C | ASP3-1 | 1804 | 1930 | 0 |
| 8163 | YLR157C | C | ASP3-2 | 1205 | 1223 | 0 |

|      |         |   |       |      |      |   |
|------|---------|---|-------|------|------|---|
| 8164 | YLR159W | W |       | 450  | 346  | 0 |
| 8165 | YLR161W | W |       | 460  | 341  | 0 |
| 8166 | YLR163C | C | MAS1  | 528  | 707  | 0 |
| 8167 | YLR249W | W | YEF3  | 6868 | 3985 | 0 |
| 8168 | YLR251W | W |       | 447  | 437  | 0 |
| 8169 | YLR253W | W |       | 621  | 619  | 0 |
| 8170 | YLR255C | C |       | 398  | 279  | 0 |
| 8171 | YLR257W | W |       | 1437 | 1385 | 0 |
| 8172 | YLR259C | C | HSP60 | 3100 | 5577 | 0 |
| 8173 | YLR345W | W |       | 622  | 605  | 0 |
| 8174 | YLR347C | C | KAP95 | 982  | 1074 | 2 |
| 8175 | YLR349W | W |       | 492  | 574  | 0 |
| 8176 | YLR351C | C | NIT3  | 1181 | 1316 | 0 |
| 8177 | YLR353W | W | BUD8  | 807  | 688  | 0 |
| 8178 | YLR355C | C | ILV5  | 4875 | 4174 | 0 |
| 8179 | YLR441C | C | RPS1A | 2928 | 3224 | 0 |
| 8180 | YLR443W | W | ECM7  | 572  | 496  | 0 |
| 8181 | YLR445W | W |       | 482  | 366  | 0 |
| 8182 | YLR447C | C | VMA6  | 2131 | 2105 | 0 |
| 8183 | YLR449W | W | FPR4  | 2236 | 2079 | 0 |
| 8184 | YLR451W | W | LEU3  | 662  | 756  | 0 |
| 8185 | YML082W | W |       | 605  | 594  | 0 |
| 8186 | YML084W | W |       | 298  | 214  | 0 |
| 8187 | YML088W | W | UF01  | 522  | 600  | 0 |
| 8188 | YML090W | W |       | 494  | 277  | 0 |
| 8189 | YML092C | C | PRE8  | 999  | 1231 | 0 |
| 8190 | YML095C | C | RAD10 | 371  | 334  | 0 |
| 8191 | YMR054W | W | STV1  | 1109 | 1078 | 0 |
| 8192 | YMR056C | C | AAC1  | 467  | 384  | 0 |
| 8193 | YMR058W | W | FET3  | 3088 | 2952 | 0 |
| 8194 | YMR061W | W | RNA14 | 644  | 614  | 0 |
| 8195 | YMR064W | W | AEP1  | 636  | 693  | 0 |
| 8196 | YMR066W | W | SOV1  | 383  | 367  | 0 |
| 8197 | YMR160W | W |       | 433  | 401  | 0 |
| 8198 | YMR162C | C | DNF3  | 296  | 227  | 1 |
| 8199 | YMR164C | C | MSS11 | 459  | 539  | 0 |
| 8200 | YMR167W | W | MLH1  | 539  | 566  | 0 |
| 8201 | YMR170C | C | ALD2  | 604  | 2495 | 0 |
| 8202 | YMR172W | W | HOT1  | 474  | 536  | 0 |
| 8203 | YMR268C | C | PRP24 | 315  | 248  | 1 |
| 8204 | YMR270C | C | RRN9  | 719  | 669  | 0 |
| 8205 | YMR272C | C | SCS7  | 1427 | 1180 | 0 |
| 8206 | YMR275C | C | BUL1  | 706  | 724  | 0 |
| 8207 | YMR277W | W | FCP1  | 1100 | 1234 | 0 |
| 8208 | YMR279C | C |       | 657  | 734  | 0 |
| 8209 | YNL042W | W | BOP3  | 579  | 678  | 0 |
| 8210 | YNL044W | W | YIP3  | 1071 | 953  | 2 |
| 8211 | YNL046W | W |       | 568  | 571  | 0 |
| 8212 | YNL048W | W | ALG11 | 981  | 995  | 0 |
| 8213 | YNL050C | C |       | 282  | 218  | 1 |
| 8214 | YNL052W | W | COX5A | 998  | 741  | 0 |
| 8215 | YNL138W | W | SRV2  | 1729 | 2558 | 0 |

|      |         |   |       |       |      |   |
|------|---------|---|-------|-------|------|---|
| 8216 | YNL140C | C |       | 945   | 986  | 0 |
| 8217 | YNL142W | W | MEP2  | 442   | 339  | 0 |
| 8218 | YNL144C | C |       | 351   | 237  | 0 |
| 8219 | YNL146W | W |       | 330   | 244  | 0 |
| 8220 | YNL148C | C | ALF1  | 316   | 240  | 0 |
| 8221 | YNL234W | W |       | 383   | 451  | 0 |
| 8222 | YNL236W | W | SIN4  | 375   | 377  | 0 |
| 8223 | YNL238W | W | KEX2  | 559   | 593  | 0 |
| 8224 | YNL240C | C | NAR1  | 406   | 351  | 0 |
| 8225 | YNL242W | W | APG2  | 303   | 246  | 0 |
| 8226 | YNL244C | C | SUI1  | 1182  | 1469 | 1 |
| 8227 | YNL330C | C | RPD3  | 821   | 932  | 0 |
| 8228 | YNL332W | W | THI12 | 492   | 379  | 0 |
| 8229 | YNL334C | C | SN02  | 520   | 446  | 0 |
| 8230 | YNL336W | W | COS1  | 1703  | 1999 | 0 |
| 8231 | YNL338W | W |       | 1227  | 962  | 0 |
| 8232 | YNR001C | C | CIT1  | 1203  | 2246 | 0 |
| 8233 | YOL010W | W | RCL1  | 725   | 1064 | 0 |
| 8234 | YOL012C | C | HTZ1  | 713   | 680  | 0 |
| 8235 | YOL014W | W |       | 364   | 285  | 0 |
| 8236 | YOL016C | C | CMK2  | 416   | 482  | 0 |
| 8237 | YOL018C | C | TLG2  | 446   | 499  | 0 |
| 8238 | YOL020W | W | TAT2  | 574   | 608  | 0 |
| 8239 | YOL105C | C | WSC3  | 674   | 585  | 0 |
| 8240 | YOL107W | W |       | 647   | 626  | 0 |
| 8241 | YOL109W | W | ZE01  | 2393  | 2609 | 0 |
| 8242 | YOL111C | C |       | 1077  | 1068 | 0 |
| 8243 | YOL113W | W | SKM1  | 502   | 429  | 0 |
| 8244 | YOL115W | W | TRF4  | 647   | 662  | 0 |
| 8245 | YOR035C | C | SHE4  | 447   | 433  | 0 |
| 8246 | YOR037W | W | CYC2  | 472   | 689  | 0 |
| 8247 | YOR039W | W | CKB2  | 1070  | 1116 | 0 |
| 8248 | YOR041C | C |       | 800   | 980  | 0 |
| 8249 | YOR043W | W | WHI2  | 898   | 920  | 0 |
| 8250 | YOR045W | W | TOM6  | 602   | 610  | 0 |
| 8251 | YOR131C | C |       | 510   | 542  | 0 |
| 8252 | YOR133W | W | EFT1  | 14010 | 9087 | 0 |
| 8253 | YOR135C | C |       | 1145  | 2088 | 0 |
| 8254 | YOR137C | C |       | 578   | 530  | 0 |
| 8255 | YOR139C | C |       | 363   | 286  | 0 |
| 8256 | YOR141C | C | ARP8  | 680   | 812  | 0 |
| 8257 | YOR227W | W |       | 557   | 656  | 0 |
| 8258 | YOR229W | W | WTM2  | 663   | 817  | 0 |
| 8259 | YOR231W | W | MKK1  | 913   | 983  | 0 |
| 8260 | YOR233W | W | KIN4  | 610   | 836  | 0 |
| 8261 | YOR235W | W |       | 342   | 258  | 0 |
| 8262 | YOR237W | W | HES1  | 465   | 415  | 0 |
| 8263 | YOR323C | C | PRO2  | 2120  | 2551 | 0 |
| 8264 | YOR325W | W |       | 565   | 468  | 0 |
| 8265 | YOR327C | C | SNC2  | 881   | 1424 | 0 |
| 8266 | YOR329C | C | SCD5  | 701   | 785  | 0 |
| 8267 | YOR331C | C |       | 2324  | 3364 | 0 |

|      |         |   |        |      |      |   |
|------|---------|---|--------|------|------|---|
| 8268 | YOR333C | C |        | 431  | 300  | 0 |
| 8269 | YPL025C | C |        | 288  | 213  | 0 |
| 8270 | YPL027W | W | SMA1   | 289  | 202  | 0 |
| 8271 | YPL029W | W | SUV3   | 338  | 380  | 0 |
| 8272 | YPL031C | C | PH085  | 369  | 408  | 0 |
| 8273 | YPL033C | C |        | 774  | 371  | 0 |
| 8274 | YPL035C | C |        | 331  | 380  | 0 |
| 8275 | YPL121C | C | MEI5   | 293  | 194  | 0 |
| 8276 | YPL123C | C | RNY1   | 303  | 278  | 0 |
| 8277 | YPL125W | W | KAP120 | 304  | 263  | 0 |
| 8278 | YPL127C | C | HH01   | 312  | 299  | 0 |
| 8279 | YPL129W | W | ANC1   | 954  | 1251 | 0 |
| 8280 | YPL131W | W | RPL5   | 8115 | 7032 | 0 |
| 8281 | YPL217C | C | BMS1   | 525  | 760  | 0 |
| 8282 | YPL219W | W | PCL8   | 488  | 467  | 0 |
| 8283 | YPL221W | W | BOP1   | 948  | 1246 | 0 |
| 8284 | YPL223C | C | GRE1   | 304  | 485  | 0 |
| 8285 | YPL225W | W |        | 943  | 1528 | 0 |
| 8286 | YPL227C | C | ALG5   | 542  | 683  | 0 |
| 8287 | YPR030W | W | CSR2   | 284  | 206  | 0 |
| 8288 | YPR032W | W | SR07   | 405  | 448  | 0 |
| 8289 | YPR034W | W | ARP7   | 854  | 1082 | 0 |
| 8290 | YPR036W | W | VMA13  | 1912 | 3137 | 0 |
| 8291 | YPR038W | W |        | 600  | 583  | 0 |
| 8292 | YPR040W | W | SDF1   | 531  | 573  | 0 |
| 8293 | YPR126C | C |        | 554  | 779  | 0 |
| 8294 | YPR128C | C | ANT1   | 931  | 918  | 0 |
| 8295 | YPR130C | C |        | 1075 | 1311 | 0 |
| 8296 | YPR132W | W | RPS23B | 1921 | 2212 | 0 |
| 8297 | YPR134W | W | MSS18  | 386  | 381  | 0 |
| 8298 | YPR136C | C | FYV15  | 474  | 653  | 0 |
| 8299 | EMPTY   |   |        | 294  | 215  | 1 |
| 8300 | EMPTY   |   |        | 279  | 225  | 1 |
| 8301 | EMPTY   |   |        | 350  | 336  | 0 |
| 8302 | EMPTY   |   |        | 363  | 331  | 0 |
| 8303 | EMPTY   |   |        | 284  | 216  | 0 |
| 8304 | EMPTY   |   |        | 344  | 280  | 0 |
| 8305 | NORF 76 |   |        | 413  | 405  | 1 |
| 8306 | NORF 80 |   |        | 395  | 428  | 1 |
| 8307 | NORF 84 |   |        | 450  | 495  | 0 |
| 8308 | NORF 88 |   |        | 320  | 291  | 0 |
| 8309 | NORF 92 |   |        | 391  | 339  | 0 |
| 8310 | NORF 96 |   |        | 415  | 417  | 0 |
| 8311 | YDR356W | W | NUF1   | 573  | 592  | 2 |
| 8312 | YDR409W | W | SIZ1   | 325  | 341  | 0 |
| 8313 | YDR457W | W | TOM1   | 306  | 259  | 1 |
| 8314 | YDR496C | C | PUF6   | 1358 | 2211 | 0 |
| 8315 | YEL008W | W |        | 346  | 262  | 0 |
| 8316 | YER004W | W |        | 1463 | 1821 | 0 |
| 8317 | YJL171C | C |        | 1619 | 1626 | 0 |
| 8318 | YJL220W | W |        | 453  | 336  | 0 |
| 8319 | YJR066W | W | TOR1   | 861  | 1482 | 2 |

|      |              |   |        |      |      |   |
|------|--------------|---|--------|------|------|---|
| 8320 | YJR101W      | W | RSM26  | 675  | 712  | 0 |
| 8321 | YJR138W      | W | IML1   | 321  | 297  | 1 |
| 8322 | YKL001C      | C | MET14  | 560  | 711  | 0 |
| 8323 | YOR061W      | W | CKA2   | 1199 | 1398 | 0 |
| 8324 | YOR093C      | C |        | 343  | 350  | 2 |
| 8325 | YOR116C      | C | RP031  | 1114 | 1487 | 2 |
| 8326 | YOR172W      | W |        | 749  | 854  | 0 |
| 8327 | YOR174W      | W | MED4   | 852  | 787  | 0 |
| 8328 | YOR221C      | C | MCT1   | 1608 | 1954 | 0 |
| 8329 | EMPTY        |   |        | 439  | 220  | 0 |
| 8330 | EMPTY        |   |        | 378  | 392  | 0 |
| 8331 | EMPTY        |   |        | 277  | 213  | 0 |
| 8332 | EMPTY        |   |        | 416  | 596  | 0 |
| 8333 | EMPTY        |   |        | 301  | 272  | 0 |
| 8334 | EMPTY        |   |        | 294  | 239  | 0 |
| 8335 | YBR286W-200  |   |        | 4212 | 7566 | 0 |
| 8336 | YBR286W-300  |   |        | 3812 | 6098 | 0 |
| 8337 | YBR286W-400  |   |        | 2836 | 4402 | 0 |
| 8338 | YBR286W-500  |   |        | 1879 | 2927 | 0 |
| 8339 | YBR286W-600  |   |        | 1555 | 2578 | 0 |
| 8340 | YBR286W-700  |   |        | 1126 | 1875 | 0 |
| 8341 | EMPTY        |   |        | 295  | 260  | 0 |
| 8342 | EMPTY        |   |        | 327  | 268  | 0 |
| 8343 | EMPTY        |   |        | 331  | 274  | 0 |
| 8344 | EMPTY        |   |        | 309  | 249  | 0 |
| 8345 | EMPTY        |   |        | 309  | 240  | 0 |
| 8346 | EMPTY        |   |        | 314  | 235  | 0 |
| 8347 | YMR229C      | C | RRP5   | 814  | 967  | 0 |
| 8348 | YMR261C      | C | TPS3   | 459  | 460  | 0 |
| 8349 | YMR313C      | C |        | 728  | 734  | 0 |
| 8350 | YNL088W      | W | TOP2   | 604  | 770  | 0 |
| 8351 | YNL106C      | C | INP52  | 480  | 432  | 2 |
| 8352 | YOR016C      | C | ERP4   | 822  | 844  | 0 |
| 8353 | YBR286W-1250 |   |        | 344  | 281  | 1 |
| 8354 | YBR286W-1350 |   |        | 315  | 241  | 1 |
| 8355 | YBR286W-1450 |   |        | 335  | 280  | 1 |
| 8356 | YBR286W-1550 |   |        | 296  | 249  | 1 |
| 8357 | YBR286W-1650 |   |        | 372  | 364  | 1 |
| 8358 | EMPTY        |   |        | 296  | 249  | 0 |
| 8359 | YOR341W      | W | RPA190 | 668  | 824  | 0 |
| 8360 | YOR346W      | W | REV1   | 375  | 426  | 1 |
| 8361 | YOR355W      | W | GDS1   | 2915 | 3603 | 0 |
| 8362 | YOR359W      | W |        | 326  | 297  | 1 |
| 8363 | YOR361C      | C | PRT1   | 2507 | 3001 | 0 |
| 8364 | YOR370C      | C | MRS6   | 1674 | 2289 | 0 |
| 8365 | EMPTY        |   |        | 319  | 277  | 0 |
| 8366 | EMPTY        |   |        | 336  | 271  | 0 |
| 8367 | EMPTY        |   |        | 353  | 289  | 0 |
| 8368 | EMPTY        |   |        | 336  | 264  | 0 |
| 8369 | EMPTY        |   |        | 353  | 283  | 0 |
| 8370 | EMPTY        |   |        | 330  | 275  | 0 |
| 8371 | EMPTY        |   |        | 359  | 289  | 0 |

|      |             |   |       |     |     |   |
|------|-------------|---|-------|-----|-----|---|
| 8372 | EMPTY       |   | 511   | 553 | 0   |   |
| 8373 | EMPTY       |   | 401   | 330 | 0   |   |
| 8374 | EMPTY       |   | 387   | 346 | 0   |   |
| 8375 | EMPTY       |   | 388   | 366 | 0   |   |
| 8376 | EMPTY       |   | 400   | 373 | 0   |   |
| 8377 | YHR154W     | W | ESC4  | 331 | 290 | 1 |
| 8378 | YHR172W     | W | SPC97 | 349 | 283 | 1 |
| 8379 | YIL093C     | C | RSM25 | 353 | 276 | 1 |
| 8380 | YIL105C     | C |       | 522 | 356 | 1 |
| 8381 | YJL011C     | C |       | 611 | 755 | 0 |
| 8382 | YJL030W     | W | MAD2  | 350 | 335 | 1 |
| 8383 | EMPTY       |   |       | 350 | 305 | 0 |
| 8384 | EMPTY       |   |       | 332 | 288 | 0 |
| 8385 | EMPTY       |   |       | 333 | 289 | 0 |
| 8386 | EMPTY       |   |       | 341 | 289 | 0 |
| 8387 | EMPTY       |   |       | 343 | 296 | 0 |
| 8388 | EMPTY       |   |       | 339 | 299 | 0 |
| 8389 | EMPTY       |   |       | 342 | 300 | 0 |
| 8390 | EMPTY       |   |       | 371 | 310 | 0 |
| 8391 | EMPTY       |   |       | 352 | 298 | 0 |
| 8392 | EMPTY       |   |       | 343 | 307 | 0 |
| 8393 | EMPTY       |   |       | 374 | 302 | 0 |
| 8394 | EMPTY       |   |       | 384 | 321 | 0 |
| 8395 | EMPTY       |   |       | 403 | 418 | 0 |
| 8396 | EMPTY       |   |       | 382 | 346 | 0 |
| 8397 | EMPTY       |   |       | 402 | 361 | 0 |
| 8398 | EMPTY       |   |       | 396 | 374 | 0 |
| 8399 | EMPTY       |   |       | 415 | 385 | 0 |
| 8400 | EMPTY       |   |       | 425 | 388 | 0 |
| 8401 | E. COLI #10 |   |       | 375 | 338 | 0 |
| 8402 | E. COLI #33 |   |       | 371 | 333 | 0 |
| 8403 | E. COLI #36 |   |       | 366 | 324 | 0 |
| 8404 | E. COLI #40 |   |       | 405 | 336 | 0 |
| 8405 | 3XSSC       |   |       | 365 | 337 | 0 |
| 8406 | 3XSSC       |   |       | 371 | 320 | 0 |
| 8407 | EMPTY       |   |       | 360 | 337 | 0 |
| 8408 | EMPTY       |   |       | 362 | 350 | 0 |
| 8409 | EMPTY       |   |       | 372 | 352 | 0 |
| 8410 | EMPTY       |   |       | 397 | 341 | 0 |
| 8411 | EMPTY       |   |       | 371 | 329 | 0 |
| 8412 | EMPTY       |   |       | 375 | 339 | 0 |
| 8413 | EMPTY       |   |       | 569 | 905 | 0 |
| 8414 | EMPTY       |   |       | 367 | 329 | 0 |
| 8415 | EMPTY       |   |       | 378 | 401 | 0 |
| 8416 | EMPTY       |   |       | 384 | 336 | 0 |
| 8417 | EMPTY       |   |       | 398 | 286 | 0 |
| 8418 | EMPTY       |   |       | 445 | 381 | 0 |
| 8419 | EMPTY       |   |       | 412 | 373 | 0 |
| 8420 | EMPTY       |   |       | 447 | 392 | 0 |
| 8421 | EMPTY       |   |       | 454 | 403 | 0 |
| 8422 | EMPTY       |   |       | 439 | 401 | 0 |
| 8423 | EMPTY       |   |       | 455 | 428 | 0 |

|                  |     |     |   |
|------------------|-----|-----|---|
| 8424 EMPTY       | 449 | 436 | 0 |
| 8425 E. COLI #10 | 405 | 389 | 0 |
| 8426 E. COLI #33 | 392 | 370 | 0 |
| 8427 E. COLI #36 | 396 | 373 | 0 |
| 8428 E. COLI #40 | 397 | 363 | 0 |
| 8429 3XSSC       | 396 | 365 | 0 |
| 8430 3XSSC       | 407 | 393 | 0 |
| 8431 EMPTY       | 414 | 400 | 0 |
| 8432 EMPTY       | 419 | 383 | 0 |
| 8433 EMPTY       | 403 | 370 | 0 |
| 8434 EMPTY       | 404 | 382 | 0 |
| 8435 EMPTY       | 410 | 391 | 0 |
| 8436 EMPTY       | 412 | 389 | 0 |
| 8437 EMPTY       | 436 | 392 | 0 |
| 8438 EMPTY       | 469 | 440 | 0 |
| 8439 EMPTY       | 411 | 386 | 0 |
| 8440 EMPTY       | 423 | 398 | 0 |
| 8441 EMPTY       | 426 | 381 | 0 |
| 8442 EMPTY       | 476 | 421 | 0 |
| 8443 EMPTY       | 461 | 400 | 0 |
| 8444 EMPTY       | 470 | 447 | 0 |
| 8445 EMPTY       | 450 | 450 | 0 |
| 8446 EMPTY       | 491 | 467 | 0 |
| 8447 EMPTY       | 468 | 474 | 0 |
| 8448 EMPTY       | 472 | 475 | 0 |

| z-score_c | z-score_ch1 (p) | Ch2       | med-bkg  | z-score  | z-score (p) |
|-----------|-----------------|-----------|----------|----------|-------------|
| 0.410651  | 0.410651        | gamma     | 1235.468 | 0.470916 | 0.470916    |
| 2.063936  | 2.063936        | 126.5321  | 1235.468 | 1.588347 | 1.588347    |
| 0.17018   | 0.17018         | sigma (lc | 1235.468 | -0.00094 | -0.00094    |
| -0.44219  | -0.44219        | 0.374563  | 1235.468 | -0.50903 | -0.50903    |
| -0.29472  | -0.29472        | mu (log10 | 1235.468 | -0.31387 | -0.31387    |
| 0.050836  | 0.050836        | (each gri | 1235.468 | 1.02456  | 1.02456     |
| -0.83518  | -0.83518        |           | 1235.468 | -0.50033 | -0.50033    |
| 0.160917  | 0.160917        | upper lin | 1235.468 | 0.245236 | 0.245236    |
| -1.18415  | -1.18415        | 2.2       | 1235.468 | -0.91029 | -0.91029    |
| 0.28544   | 0.28544         | lower lin | 1235.468 | 0.446911 | 0.446911    |
| 1.482716  | 1.482716        | -1.7      | 1235.468 | 1.047981 | 1.047981    |
| 0.578365  | 0.578365        |           | 1235.468 | 0.352532 | 0.352532    |
| 0.73194   | 0.73194         |           | 1235.468 | 1.03537  | 1.03537     |
| 0.357055  | 0.357055        |           | 1235.468 | 0.283341 | 0.283341    |
| 0.209052  | 0.209052        |           | 1235.468 | 0.626877 | 0.626877    |
| 0.249113  | 0.249113        |           | 1235.468 | 0.391344 | 0.391344    |
| 0.534131  | 0.534131        |           | 1235.468 | 0.714228 | 0.714228    |
| 0.873082  |                 |           | 1235.468 | 0.743261 |             |
| ...       | ...             | ...       | ...      | ...      | ...         |
| ...       | ...             | ...       | ...      | ...      | ...         |
| ...       | ...             | ...       | ...      | ...      | ...         |
| ...       | ...             | ...       | ...      | ...      | ...         |
| ...       | ...             | ...       | ...      | ...      | ...         |





































































































































































































































































































































| log2ratio | log2ratio | (p) |
|-----------|-----------|-----|
| -0.0754   | -0.0754   |     |
| 0.595052  | 0.595052  |     |
| 0.214102  | 0.214102  |     |
| 0.083625  | 0.083625  |     |
| 0.023957  | 0.023957  |     |
| -1.21831  | -1.21831  |     |
| -0.41896  | -0.41896  |     |
| -0.1055   | -0.1055   |     |
| -0.34265  | -0.34265  |     |
| -0.20203  | -0.20203  |     |
| 0.543936  | 0.543936  |     |
| 0.28256   | 0.28256   |     |
| -0.37965  | -0.37965  |     |
| 0.092231  | 0.092231  |     |
| -0.52278  | -0.52278  |     |
| -0.17796  | -0.17796  |     |
| -0.22534  | -0.22534  |     |
| 0.162431  |           |     |
| ...       | ...       |     |
| ...       | ...       |     |
| ...       | ...       |     |
| ...       | ...       |     |
| ...       | ...       |     |
